# Supplementary material for: Long-Term Benefits of TUDCA Supplement in ARSACS Zebrafish Model
Source: Research Square preprint supplement (doi:10.21203/rs.3.rs-5957432/v1), 2025-04-16
Supplement: Supplementary file 1 [file e5a8a3546065612e45e5b7ff.xlsx]

## Sheet: Foglio1
Table 1: differentially expressed gene transcripts (DEGs)
Row names	log2 Fold Change	Fold change	padj	"- LOG10 padj "
ENSDARG00000069734	3.94496	0.430417	1.50851e-17	16.8215
ENSDARG00000069735	3.42629	0.456697	4.37831e-12	11.3587
ENSDARG00000079078	2.98429	0.593655	5.29376e-06	5.27624
ENSDARG00000089087	2.84508	0.613949	2.57297e-05	4.58957
ENSDARG00000097011	2.65939	0.719553	0.000659587	3.18073
ENSDARG00000097238	2.55202	0.556809	3.09026e-05	4.51
ENSDARG00000079043	2.3753	1.0792	0.0207203	1.6836
ENSDARG00000077504	2.34288	0.430304	7.84222e-07	6.10556
ENSDARG00000054055	2.22011	0.686639	0.00222352	2.65296
ENSDARG00000012881	2.20071	0.291074	2.57316e-12	11.5895
ENSDARG00000019253	2.14621	0.536662	0.000231682	3.63511
ENSDARG00000055053	2.12299	0.329135	3.84166e-09	8.41548
ENSDARG00000079946	2.12142	0.235072	3.82569e-17	16.4173
ENSDARG00000038643	2.01753	0.292819	2.72109e-10	9.56526
ENSDARG00000105484	2.00041	0.728138	0.00720935	2.1421
ENSDARG00000105022	1.99017	0.551751	0.000862099	3.06444
ENSDARG00000109737	1.95036	0.691486	0.00585991	2.23211
ENSDARG00000042090	1.93458	0.611902	0.00279269	2.55398
ENSDARG00000094857	1.91373	0.272467	1.04981e-10	9.97889
ENSDARG00000020890	1.90496	0.384993	7.1632e-06	5.14489
ENSDARG00000105345	1.8916	0.601563	0.00280483	2.55209
ENSDARG00000057206	1.84992	0.797032	0.0169569	1.77065
ENSDARG00000033227	1.84515	0.673343	0.00724572	2.13992
ENSDARG00000040944	1.77338	0.649125	0.00739599	2.131
ENSDARG00000094533	1.76433	0.579796	0.003884	2.41072
ENSDARG00000019856	1.69474	0.218658	7.74321e-13	12.1111
ENSDARG00000096992	1.68002	0.798684	0.0216968	1.6636
ENSDARG00000000796	1.65522	0.282542	9.26281e-08	7.03326
ENSDARG00000036427	1.61715	0.190853	2.68191e-15	14.5716
ENSDARG00000055876	1.61053	0.177816	3.16112e-17	16.5002
ENSDARG00000087981	1.59117	0.416112	0.000466217	3.33141
ENSDARG00000037691	1.55905	0.304653	3.41631e-06	5.46644
ENSDARG00000009018	1.53572	0.318695	1.24276e-05	4.90561
ENSDARG00000053066	1.51659	0.508508	0.00438886	2.35765
ENSDARG00000053262	1.5029	0.159195	2.47389e-18	17.6066
ENSDARG00000041799	1.50092	0.135269	1.78607e-25	24.7481
ENSDARG00000056774	1.48915	0.29731	5.54301e-06	5.25625
ENSDARG00000059053	1.48183	0.341807	8.14473e-05	4.08912
ENSDARG00000112375	1.47726	0.730314	0.0251334	1.59975
ENSDARG00000070717	1.44778	0.219061	1.39979e-09	8.85394
ENSDARG00000102340	1.43275	0.269494	1.38428e-06	5.85878
ENSDARG00000053831	1.42197	0.329365	8.91273e-05	4.04999
ENSDARG00000104027	1.40014	0.50867	0.00724572	2.13992
ENSDARG00000018077	1.40013	0.739581	0.0293969	1.5317
ENSDARG00000057789	1.3995	0.843342	0.0388057	1.4111
ENSDARG00000057598	1.3976	0.177961	3.58158e-13	12.4459
ENSDARG00000044642	1.39469	0.229916	3.03758e-08	7.51747
ENSDARG00000032010	1.38914	0.347987	0.000256932	3.59018
ENSDARG00000111396	1.38656	0.525153	0.00889171	2.05101
ENSDARG00000045414	1.3798	0.23372	7.86019e-08	7.10457
ENSDARG00000076534	1.3729	0.636028	0.0212463	1.67272
ENSDARG00000070155	1.36987	0.228997	4.92194e-08	7.30786
ENSDARG00000088140	1.36646	0.303075	4.0663e-05	4.3908
ENSDARG00000044098	1.34705	0.334713	0.00023921	3.62122
ENSDARG00000093198	1.34629	0.923698	0.0487911	1.31166
ENSDARG00000101362	1.34493	0.323266	0.000156937	3.80427
ENSDARG00000053493	1.33828	0.302202	6.00887e-05	4.22121
ENSDARG00000013730	1.33537	0.144431	1.04269e-17	16.9818
ENSDARG00000034852	1.325	0.367026	0.000820515	3.08591
ENSDARG00000042641	1.31983	0.160523	2.18204e-14	13.6611
ENSDARG00000061274	1.31708	0.293636	4.54292e-05	4.34266
ENSDARG00000103025	1.29243	0.263498	8.53845e-06	5.06862
ENSDARG00000105508	1.27821	0.899424	0.0483414	1.31568
ENSDARG00000078847	1.27317	0.35249	0.000855979	3.06754
ENSDARG00000103498	1.27115	0.218981	9.4181e-08	7.02604
ENSDARG00000109458	1.2686	0.672866	0.0307005	1.51285
ENSDARG00000004964	1.26653	0.245992	3.12133e-06	5.50566
ENSDARG00000052734	1.24566	0.146624	2.6566e-15	14.5757
ENSDARG00000040135	1.24004	0.183539	6.06515e-10	9.21716
ENSDARG00000022437	1.23159	0.537437	0.0173592	1.76047
ENSDARG00000016733	1.22487	0.262754	2.38577e-05	4.62237
ENSDARG00000091579	1.21756	0.238205	3.68852e-06	5.43315
ENSDARG00000091061	1.20484	0.35639	0.00163918	2.78537
ENSDARG00000013236	1.20191	0.210246	1.99139e-07	6.70084
ENSDARG00000044688	1.1937	0.212914	3.69251e-07	6.43268
ENSDARG00000051735	1.189	0.598524	0.0271661	1.56597
ENSDARG00000051718	1.18864	0.697181	0.0384939	1.41461
ENSDARG00000114895	1.18775	0.658617	0.0348639	1.45762
ENSDARG00000043180	1.17758	0.185204	6.29238e-09	8.20119
ENSDARG00000037997	1.17476	0.222516	1.75911e-06	5.75471
ENSDARG00000094132	1.16899	0.317126	0.00068865	3.162
ENSDARG00000099306	1.16065	0.2781	0.000154418	3.8113
ENSDARG00000074662	1.15402	0.346085	0.00187677	2.72659
ENSDARG00000044754	1.15394	0.660179	0.0372305	1.4291
ENSDARG00000087554	1.14929	0.722502	0.0444696	1.35194
ENSDARG00000100024	1.14451	0.614954	0.0324677	1.48855
ENSDARG00000035603	1.14269	0.486408	0.0162172	1.79003
ENSDARG00000051730	1.13863	0.376594	0.00425688	2.37091
ENSDARG00000007739	1.13544	0.788251	0.0496514	1.30407
ENSDARG00000077138	1.13025	0.384607	0.0052224	2.28213
ENSDARG00000059826	1.12821	0.271237	0.000164925	3.78271
ENSDARG00000041623	1.12703	0.20317	4.95911e-07	6.3046
ENSDARG00000088247	1.11245	0.232359	1.42758e-05	4.8454
ENSDARG00000008100	1.10603	0.260452	0.000121745	3.91455
ENSDARG00000075015	1.102	0.340028	0.0024616	2.60878
ENSDARG00000025147	1.09573	0.182046	4.36293e-08	7.36022
ENSDARG00000015759	1.08328	0.299309	0.000855979	3.06754
ENSDARG00000015349	1.07873	0.280579	0.000454343	3.34262
ENSDARG00000059485	1.07766	0.304402	0.00110265	2.95756
ENSDARG00000067964	1.07722	0.134674	1.22633e-13	12.9114
ENSDARG00000044550	1.06021	0.366196	0.00578756	2.2375
ENSDARG00000079293	1.05719	0.379742	0.00725554	2.13933
ENSDARG00000027199	1.05529	0.30696	0.0015043	2.82266
ENSDARG00000060319	1.05049	0.199126	1.74492e-06	5.75823
ENSDARG00000055216	1.04722	0.120695	6.56776e-16	15.1826
ENSDARG00000045367	1.04269	0.217382	1.42758e-05	4.8454
ENSDARG00000045958	1.02686	0.426174	0.0146094	1.83537
ENSDARG00000031044	1.0266	0.432657	0.0155348	1.8087
ENSDARG00000030844	1.02467	0.344609	0.00492343	2.30773
ENSDARG00000005085	1.01763	0.243521	0.000161234	3.79254
ENSDARG00000015472	1.01185	0.149974	7.0194e-10	9.1537
ENSDARG00000071384	1.01128	0.31285	0.00261065	2.58325
ENSDARG00000099336	1.00888	0.301253	0.00187677	2.72659
ENSDARG00000098980	1.00719	0.457524	0.0210066	1.67765
ENSDARG00000016868	1.00433	0.122366	2.51776e-14	13.599
ENSDARG00000101366	1.00308	0.226145	6.06116e-05	4.21744
ENSDARG00000075625	0.996156	0.154398	3.89313e-09	8.4097
ENSDARG00000005154	0.993571	0.183941	9.92293e-07	6.00336
ENSDARG00000058839	0.992538	0.56493	0.0384767	1.4148
ENSDARG00000074425	0.990835	0.289191	0.00156057	2.80672
ENSDARG00000040890	0.990164	0.143854	2.93628e-10	9.5322
ENSDARG00000025301	0.986013	0.189664	2.62701e-06	5.58054
ENSDARG00000030490	0.980628	0.259105	0.000566432	3.24685
ENSDARG00000006003	0.979383	0.324318	0.00445308	2.35134
ENSDARG00000101322	0.978914	0.235937	0.00017719	3.75156
ENSDARG00000019260	0.978744	0.279512	0.00128028	2.89269
ENSDARG00000018459	0.976944	0.34969	0.00735007	2.13371
ENSDARG00000019404	0.97089	0.188395	3.12133e-06	5.50566
ENSDARG00000007412	0.969893	0.190837	4.48058e-06	5.34867
ENSDARG00000098645	0.958167	0.372172	0.0114385	1.94163
ENSDARG00000056722	0.947206	0.19844	1.68343e-05	4.7738
ENSDARG00000056934	0.947123	0.152659	1.54875e-08	7.81002
ENSDARG00000001873	0.946189	0.227731	0.00017719	3.75156
ENSDARG00000019353	0.93848	0.169647	5.59161e-07	6.25246
ENSDARG00000068934	0.936688	0.203673	3.18346e-05	4.4971
ENSDARG00000042826	0.93583	0.515692	0.0369506	1.43238
ENSDARG00000062501	0.933332	0.185417	5.54301e-06	5.25625
ENSDARG00000042690	0.933133	0.250528	0.00068865	3.162
ENSDARG00000089255	0.92893	0.271311	0.00157265	2.80337
ENSDARG00000101726	0.927351	0.34366	0.00913777	2.03916
ENSDARG00000018145	0.924383	0.145919	7.60136e-09	8.11911
ENSDARG00000056643	0.9227	0.421373	0.0220842	1.65592
ENSDARG00000028306	0.919133	0.227257	0.000248287	3.60505
ENSDARG00000022165	0.910365	0.430852	0.0255048	1.59338
ENSDARG00000105529	0.905001	0.161397	4.11348e-07	6.38579
ENSDARG00000098591	0.902288	0.180642	6.7538e-06	5.17045
ENSDARG00000027088	0.901384	0.211338	0.000125302	3.90204
ENSDARG00000086573	0.897825	0.239151	0.00064076	3.1933
ENSDARG00000102395	0.897655	0.343652	0.0107525	1.96849
ENSDARG00000018534	0.893157	0.159615	4.388e-07	6.35773
ENSDARG00000099124	0.880339	0.230567	0.000527227	3.278
ENSDARG00000104068	0.875497	0.228718	0.000518861	3.28495
ENSDARG00000010437	0.867269	0.44607	0.0323792	1.48973
ENSDARG00000045799	0.861477	0.384844	0.0215757	1.66604
ENSDARG00000088157	0.8573	0.264664	0.0027626	2.55868
ENSDARG00000070340	0.856849	0.507793	0.0449729	1.34705
ENSDARG00000089553	0.856816	0.21635	0.000334327	3.47583
ENSDARG00000095273	0.851133	0.14423	8.74277e-08	7.05835
ENSDARG00000021149	0.851055	0.287489	0.00554789	2.25587
ENSDARG00000036967	0.849293	0.201809	0.000154418	3.8113
ENSDARG00000039650	0.849169	0.313593	0.00926453	2.03318
ENSDARG00000007129	0.848886	0.296747	0.00683202	2.16545
ENSDARG00000042947	0.846986	0.523327	0.0468774	1.32904
ENSDARG00000094730	0.846308	0.171846	9.15887e-06	5.03816
ENSDARG00000079472	0.845097	0.212548	0.000319956	3.49491
ENSDARG00000004687	0.841455	0.232575	0.00097261	3.01206
ENSDARG00000102055	0.84032	0.204378	0.000212428	3.67279
ENSDARG00000007697	0.838387	0.208717	0.000284549	3.54584
ENSDARG00000011166	0.837649	0.21485	0.000425671	3.37093
ENSDARG00000090980	0.833771	0.297739	0.00769831	2.1136
ENSDARG00000100304	0.832982	0.314579	0.0106615	1.97218
ENSDARG00000027009	0.83265	0.233375	0.00115593	2.93707
ENSDARG00000035553	0.832041	0.253674	0.00249262	2.60334
ENSDARG00000040469	0.831237	0.337939	0.0146671	1.83366
ENSDARG00000098312	0.830502	0.170188	1.14769e-05	4.94018
ENSDARG00000054942	0.826821	0.315209	0.0112316	1.94956
ENSDARG00000099056	0.823342	0.284628	0.00639342	2.19427
ENSDARG00000056378	0.823228	0.508104	0.0484281	1.3149
ENSDARG00000102858	0.819616	0.208629	0.000386348	3.41302
ENSDARG00000005392	0.816666	0.464197	0.0417572	1.37927
ENSDARG00000043066	0.815865	0.312497	0.0115897	1.93593
ENSDARG00000067567	0.809686	0.23196	0.00144865	2.83904
ENSDARG00000019130	0.809424	0.171392	2.19587e-05	4.65839
ENSDARG00000015065	0.805514	0.293614	0.00889315	2.05094
ENSDARG00000104501	0.803579	0.478387	0.0458345	1.33881
ENSDARG00000024717	0.802969	0.269487	0.00536237	2.27064
ENSDARG00000069446	0.801135	0.424031	0.0365824	1.43673
ENSDARG00000038990	0.800496	0.362186	0.023249	1.6336
ENSDARG00000022995	0.800355	0.125371	6.29238e-09	8.20119
ENSDARG00000099776	0.798427	0.200506	0.000325743	3.48713
ENSDARG00000010710	0.795345	0.168876	2.30535e-05	4.63726
ENSDARG00000094860	0.793967	0.401237	0.032814	1.48394
ENSDARG00000013946	0.788951	0.243331	0.00283534	2.5474
ENSDARG00000087697	0.784455	0.241508	0.00282934	2.54831
ENSDARG00000053217	0.782991	0.229726	0.0018115	2.74196
ENSDARG00000038881	0.782719	0.289483	0.00977095	2.01006
ENSDARG00000039522	0.782475	0.132125	8.53353e-08	7.06887
ENSDARG00000002021	0.780877	0.229662	0.00189562	2.72225
ENSDARG00000058421	0.778932	0.207712	0.000690783	3.16066
ENSDARG00000015575	0.776847	0.229447	0.00193857	2.71252
ENSDARG00000078399	0.776273	0.180823	0.000122983	3.91015
ENSDARG00000002344	0.775157	0.108868	7.78965e-11	10.1085
ENSDARG00000024588	0.774871	0.410893	0.03781	1.42239
ENSDARG00000006456	0.773705	0.268394	0.00683202	2.16545
ENSDARG00000025012	0.772848	0.144191	1.38428e-06	5.85878
ENSDARG00000099491	0.765758	0.161822	2.19587e-05	4.65839
ENSDARG00000102115	0.764991	0.181819	0.000161234	3.79254
ENSDARG00000061478	0.762511	0.409512	0.0384225	1.41541
ENSDARG00000100952	0.761966	0.436185	0.0444696	1.35194
ENSDARG00000013575	0.761245	0.195437	0.000448492	3.34825
ENSDARG00000024479	0.758455	0.216891	0.00144074	2.84141
ENSDARG00000003869	0.75736	0.232901	0.0028503	2.54511
ENSDARG00000018817	0.75704	0.0980631	1.02408e-12	11.9897
ENSDARG00000037097	0.755564	0.286905	0.0113828	1.94375
ENSDARG00000099236	0.754066	0.203618	0.000820515	3.08591
ENSDARG00000017676	0.751998	0.174678	0.000120534	3.91889
ENSDARG00000062222	0.750056	0.218594	0.00175406	2.75596
ENSDARG00000069940	0.746091	0.252933	0.0060943	2.21508
ENSDARG00000091650	0.745737	0.406507	0.0410681	1.3865
ENSDARG00000043511	0.745097	0.181737	0.000235716	3.62761
ENSDARG00000091304	0.744251	0.315262	0.0188843	1.7239
ENSDARG00000057128	0.744148	0.314902	0.0191871	1.71699
ENSDARG00000114180	0.742037	0.352125	0.0285838	1.54388
ENSDARG00000024443	0.740953	0.179173	0.000208752	3.68037
ENSDARG00000077691	0.740439	0.443723	0.0484281	1.3149
ENSDARG00000101143	0.740121	0.29029	0.0137492	1.86172
ENSDARG00000090481	0.735703	0.191382	0.000536545	3.27039
ENSDARG00000037746	0.733494	0.175639	0.000186761	3.72871
ENSDARG00000025904	0.732749	0.173287	0.000157801	3.80189
ENSDARG00000043257	0.728518	0.0821375	1.51581e-16	15.8194
ENSDARG00000006031	0.717357	0.168009	0.000141569	3.84903
ENSDARG00000099014	0.716765	0.265608	0.0104973	1.97892
ENSDARG00000071626	0.71489	0.154377	3.39191e-05	4.46956
ENSDARG00000034777	0.705339	0.193476	0.000979913	3.00881
ENSDARG00000053248	0.70509	0.195828	0.00115593	2.93707
ENSDARG00000042469	0.705029	0.238259	0.00602429	2.22009
ENSDARG00000006260	0.703978	0.164596	0.00014169	3.84866
ENSDARG00000036809	0.703662	0.382339	0.0420366	1.37637
ENSDARG00000092225	0.702554	0.35446	0.0352718	1.45257
ENSDARG00000068732	0.70024	0.12596	5.77888e-07	6.23816
ENSDARG00000069701	0.699802	0.296382	0.0196996	1.70554
ENSDARG00000058730	0.698481	0.197112	0.00136433	2.86508
ENSDARG00000086746	0.698055	0.241321	0.00724572	2.13992
ENSDARG00000099663	0.696241	0.193091	0.00113387	2.94544
ENSDARG00000055305	0.69611	0.223075	0.00417064	2.3798
ENSDARG00000011141	0.695519	0.124132	4.78285e-07	6.32031
ENSDARG00000016393	0.695326	0.158141	8.89874e-05	4.05067
ENSDARG00000013968	0.692701	0.168908	0.000244933	3.61095
ENSDARG00000017794	0.691309	0.281833	0.0169569	1.77065
ENSDARG00000078411	0.691088	0.247843	0.00894245	2.04854
ENSDARG00000077473	0.688835	0.303166	0.0230767	1.63683
ENSDARG00000013750	0.688289	0.299494	0.022403	1.64969
ENSDARG00000022438	0.686085	0.137418	7.86465e-06	5.10432
ENSDARG00000091029	0.684219	0.402766	0.0495854	1.30465
ENSDARG00000070338	0.683779	0.335343	0.0331734	1.47921
ENSDARG00000061547	0.682433	0.267813	0.0143808	1.84222
ENSDARG00000099510	0.677108	0.150311	5.93394e-05	4.22666
ENSDARG00000035873	0.677073	0.210411	0.00335112	2.47481
ENSDARG00000114472	0.676604	0.344965	0.0373207	1.42805
ENSDARG00000027657	0.675712	0.191842	0.00148255	2.82899
ENSDARG00000040942	0.671038	0.173432	0.000527227	3.278
ENSDARG00000102015	0.670695	0.267146	0.0157179	1.80361
ENSDARG00000024831	0.670337	0.209646	0.00359297	2.44455
ENSDARG00000043658	0.669372	0.249404	0.0111719	1.95187
ENSDARG00000078785	0.668998	0.225377	0.00616538	2.21004
ENSDARG00000016301	0.668544	0.120158	7.31894e-07	6.13555
ENSDARG00000071454	0.668271	0.255243	0.0128591	1.89079
ENSDARG00000057751	0.665733	0.193782	0.00190202	2.72079
ENSDARG00000032102	0.664469	0.136907	1.45777e-05	4.83631
ENSDARG00000034424	0.664171	0.345605	0.0399272	1.39873
ENSDARG00000055398	0.66377	0.281146	0.0204411	1.6895
ENSDARG00000114237	0.662009	0.188121	0.00150601	2.82217
ENSDARG00000059060	0.661893	0.241613	0.010084	1.99637
ENSDARG00000040527	0.661723	0.250631	0.0125066	1.90286
ENSDARG00000029356	0.660133	0.296527	0.0259764	1.58542
ENSDARG00000074894	0.658494	0.162396	0.000288635	3.53965
ENSDARG00000022509	0.657351	0.270154	0.0185086	1.73263
ENSDARG00000090623	0.655215	0.256095	0.0146094	1.83537
ENSDARG00000024204	0.652742	0.289304	0.0246983	1.60733
ENSDARG00000068428	0.652482	0.286536	0.0240309	1.61923
ENSDARG00000013926	0.65036	0.251466	0.0139435	1.85563
ENSDARG00000044751	0.649324	0.20868	0.00451706	2.34514
ENSDARG00000088357	0.648529	0.151707	0.000150581	3.82223
ENSDARG00000060410	0.647812	0.296304	0.0280627	1.55187
ENSDARG00000099358	0.646751	0.180134	0.00125177	2.90247
ENSDARG00000088277	0.646072	0.202526	0.00369582	2.43229
ENSDARG00000033160	0.64577	0.238223	0.0109869	1.95912
ENSDARG00000001676	0.645476	0.248897	0.0139908	1.85416
ENSDARG00000039914	0.643225	0.0831193	9.8768e-13	12.0054
ENSDARG00000112637	0.641866	0.257419	0.0167265	1.7766
ENSDARG00000033436	0.64079	0.173249	0.000899782	3.04586
ENSDARG00000007127	0.639789	0.145146	9.11489e-05	4.04025
ENSDARG00000099412	0.637692	0.151902	0.000190393	3.72035
ENSDARG00000029064	0.636788	0.212277	0.0059745	2.2237
ENSDARG00000019302	0.636477	0.183303	0.00179568	2.74577
ENSDARG00000052470	0.635788	0.253679	0.0163924	1.78536
ENSDARG00000104431	0.633906	0.238961	0.0124358	1.90533
ENSDARG00000026369	0.632384	0.278331	0.024923	1.6034
ENSDARG00000012066	0.624554	0.199907	0.00455509	2.3415
ENSDARG00000059370	0.624402	0.303845	0.0348639	1.45762
ENSDARG00000027141	0.623628	0.119433	3.12133e-06	5.50566
ENSDARG00000023028	0.623551	0.161961	0.000604862	3.21834
ENSDARG00000093569	0.617926	0.306585	0.0374463	1.42659
ENSDARG00000054980	0.616493	0.205078	0.00602429	2.22009
ENSDARG00000039034	0.616084	0.129125	2.20781e-05	4.65604
ENSDARG00000040401	0.613461	0.340152	0.0487494	1.31203
ENSDARG00000026829	0.611106	0.159361	0.000637804	3.19531
ENSDARG00000062594	0.610196	0.189557	0.00365437	2.43719
ENSDARG00000015266	0.608613	0.127947	2.32588e-05	4.63341
ENSDARG00000040674	0.608513	0.311342	0.0411936	1.38517
ENSDARG00000070494	0.605313	0.197214	0.00537465	2.26965
ENSDARG00000102808	0.60496	0.226091	0.0125354	1.90186
ENSDARG00000102412	0.604761	0.14757	0.000268895	3.57042
ENSDARG00000057698	0.604735	0.12772	2.57147e-05	4.58982
ENSDARG00000013087	0.602616	0.158973	0.000735562	3.13338
ENSDARG00000053656	0.60096	0.109451	9.12426e-07	6.0398
ENSDARG00000044341	0.600138	0.122574	1.3973e-05	4.85471
ENSDARG00000089156	0.599719	0.156522	0.000657611	3.18203
ENSDARG00000091801	0.599158	0.255346	0.0226866	1.64423
ENSDARG00000111920	0.597997	0.25023	0.0213212	1.67119
ENSDARG00000005115	0.597796	0.258588	0.0239925	1.61992
ENSDARG00000042357	0.596072	0.321161	0.0470141	1.32777
ENSDARG00000029353	0.594061	0.243089	0.0195993	1.70776
ENSDARG00000018461	0.592117	0.286894	0.0357105	1.4472
ENSDARG00000042126	0.591586	0.266098	0.0285296	1.5447
ENSDARG00000061011	0.591539	0.297796	0.0402891	1.39481
ENSDARG00000039005	0.590018	0.260783	0.0264496	1.57758
ENSDARG00000069425	0.589022	0.204994	0.00838022	2.07674
ENSDARG00000071586	0.58867	0.208392	0.00926453	2.03318
ENSDARG00000091348	0.588535	0.108794	1.38428e-06	5.85878
ENSDARG00000052330	0.58818	0.220326	0.0128591	1.89079
ENSDARG00000103226	0.587674	0.252238	0.0239341	1.62098
ENSDARG00000055129	0.585739	0.295432	0.0408339	1.38898
ENSDARG00000103590	0.585363	0.274422	0.0331293	1.47979
ENSDARG00000009534	0.585311	0.175065	0.00274475	2.5615
ENSDARG00000058966	0.584439	0.225573	0.0149616	1.82502
ENSDARG00000038428	0.583433	0.298566	0.0420547	1.37619
ENSDARG00000088023	0.582797	0.159612	0.00115593	2.93707
ENSDARG00000102975	0.582766	0.110202	2.46983e-06	5.60733
ENSDARG00000004757	0.581946	0.150352	0.000607748	3.21628
ENSDARG00000068262	0.581566	0.218617	0.0133437	1.87472
ENSDARG00000011611	0.581496	0.101475	3.16161e-07	6.50009
ENSDARG00000043148	0.57794	0.264288	0.0310693	1.50767
ENSDARG00000025350	0.577307	0.114725	7.81323e-06	5.10717
ENSDARG00000091161	0.576611	0.127086	5.97872e-05	4.22339
ENSDARG00000095459	0.575931	0.237612	0.0204522	1.68926
ENSDARG00000019113	0.575347	0.277234	0.0366995	1.43534
ENSDARG00000017982	0.574085	0.312064	0.0493698	1.30654
ENSDARG00000002731	0.572889	0.127392	7.03803e-05	4.15255
ENSDARG00000021806	0.572761	0.14853	0.000638681	3.19472
ENSDARG00000017299	0.571587	0.258342	0.0300673	1.52191
ENSDARG00000074860	0.570927	0.279985	0.0383569	1.41616
ENSDARG00000006356	0.570408	0.163923	0.00190202	2.72079
ENSDARG00000019596	0.570158	0.148843	0.00068865	3.162
ENSDARG00000105159	0.569592	0.222216	0.0162113	1.79018
ENSDARG00000099389	0.568763	0.216158	0.0142742	1.84545
ENSDARG00000041068	0.567871	0.140962	0.000363161	3.4399
ENSDARG00000090912	0.567624	0.210209	0.0125506	1.90133
ENSDARG00000002523	0.565907	0.151116	0.000888779	3.05121
ENSDARG00000001889	0.565066	0.118994	2.57297e-05	4.58957
ENSDARG00000025375	0.564583	0.123863	5.7371e-05	4.24131
ENSDARG00000090297	0.563517	0.264469	0.0343789	1.46371
ENSDARG00000090872	0.556278	0.114426	1.68343e-05	4.7738
ENSDARG00000018903	0.552697	0.179632	0.00574161	2.24097
ENSDARG00000090861	0.552365	0.266364	0.03781	1.42239
ENSDARG00000055901	0.551957	0.273571	0.0408024	1.38931
ENSDARG00000075813	0.551812	0.169471	0.0036118	2.44228
ENSDARG00000052746	0.551695	0.18585	0.00725554	2.13933
ENSDARG00000005891	0.550517	0.22095	0.0191871	1.71699
ENSDARG00000027824	0.550246	0.197039	0.0106615	1.97218
ENSDARG00000056008	0.549624	0.157659	0.00193857	2.71252
ENSDARG00000058079	0.548331	0.19168	0.0091852	2.03691
ENSDARG00000021346	0.544513	0.0838225	4.6668e-09	8.33098
ENSDARG00000040946	0.541757	0.198646	0.0124244	1.90573
ENSDARG00000093572	0.541234	0.175859	0.0058399	2.23359
ENSDARG00000053542	0.540419	0.146009	0.00106881	2.9711
ENSDARG00000070914	0.53858	0.145557	0.00107723	2.96769
ENSDARG00000010770	0.538055	0.195731	0.0118615	1.92586
ENSDARG00000069737	0.536556	0.200926	0.0139908	1.85416
ENSDARG00000017780	0.534911	0.202441	0.0148349	1.82872
ENSDARG00000037259	0.534903	0.221882	0.0226651	1.64464
ENSDARG00000042948	0.534525	0.105733	7.66678e-06	5.11539
ENSDARG00000062711	0.533132	0.253524	0.037506	1.4259
ENSDARG00000055791	0.531018	0.181463	0.00829102	2.08139
ENSDARG00000015978	0.529468	0.111283	2.60422e-05	4.58432
ENSDARG00000100003	0.527277	0.264463	0.0445851	1.35081
ENSDARG00000018524	0.526837	0.168628	0.00544045	2.26436
ENSDARG00000103364	0.525616	0.109198	2.19587e-05	4.65839
ENSDARG00000044601	0.525146	0.125603	0.000239287	3.62108
ENSDARG00000102564	0.524402	0.187561	0.0109826	1.9593
ENSDARG00000056480	0.523916	0.246477	0.0369486	1.4324
ENSDARG00000042041	0.52293	0.270172	0.0477964	1.3206
ENSDARG00000078760	0.521504	0.247594	0.0379369	1.42094
ENSDARG00000014348	0.520359	0.257658	0.0426602	1.36998
ENSDARG00000036995	0.51993	0.210583	0.0211938	1.67379
ENSDARG00000090815	0.519438	0.214524	0.0231162	1.63608
ENSDARG00000087402	0.519422	0.264348	0.0468288	1.32949
ENSDARG00000058734	0.518954	0.206259	0.0193872	1.71249
ENSDARG00000077934	0.518137	0.133105	0.000632364	3.19903
ENSDARG00000070734	0.517438	0.123826	0.000244552	3.61163
ENSDARG00000003931	0.517215	0.172963	0.00730899	2.13614
ENSDARG00000044852	0.514956	0.157098	0.00368033	2.43411
ENSDARG00000057652	0.514122	0.159582	0.0043441	2.3621
ENSDARG00000019332	0.513757	0.207725	0.0211521	1.67465
ENSDARG00000041150	0.512656	0.125083	0.000321971	3.49218
ENSDARG00000077523	0.512077	0.142221	0.00151902	2.81844
ENSDARG00000102249	0.511297	0.191702	0.0147062	1.8325
ENSDARG00000104929	0.511238	0.2404	0.0378179	1.4223
ENSDARG00000075842	0.509935	0.214034	0.0249899	1.60224
ENSDARG00000029150	0.508849	0.139992	0.00140332	2.85284
ENSDARG00000031216	0.508004	0.178523	0.0103476	1.98516
ENSDARG00000024314	0.507137	0.139481	0.00138285	2.85923
ENSDARG00000018600	0.506708	0.151953	0.00323999	2.48946
ENSDARG00000087753	0.504983	0.251098	0.0451345	1.34549
ENSDARG00000102234	0.504549	0.235532	0.03781	1.42239
ENSDARG00000103490	0.503929	0.169085	0.00779015	2.10845
ENSDARG00000036080	0.503711	0.081869	3.63317e-08	7.43971
ENSDARG00000004034	0.502876	0.16003	0.00537465	2.26965
ENSDARG00000054172	0.502067	0.177544	0.0108588	1.96422
ENSDARG00000038784	0.502025	0.138278	0.00140752	2.85155
ENSDARG00000032296	0.501826	0.168582	0.00778689	2.10864
ENSDARG00000061161	0.501295	0.219027	0.0302125	1.51981
ENSDARG00000077946	-0.501384	0.121739	0.000286482	3.5429
ENSDARG00000103479	-0.503058	0.120699	0.000242174	3.61587
ENSDARG00000117245	-0.503842	0.176293	0.0095135	2.02166
ENSDARG00000011020	-0.507651	0.165446	0.0059745	2.2237
ENSDARG00000007523	-0.508649	0.120922	0.000213735	3.67012
ENSDARG00000062361	-0.510223	0.115816	0.000109319	3.9613
ENSDARG00000061204	-0.510689	0.185119	0.0116245	1.93463
ENSDARG00000016464	-0.51216	0.15733	0.00367512	2.43473
ENSDARG00000062823	-0.512164	0.136094	0.000871929	3.05952
ENSDARG00000099522	-0.513058	0.205503	0.0193872	1.71249
ENSDARG00000052419	-0.513089	0.122424	0.000217457	3.66263
ENSDARG00000039392	-0.513803	0.142915	0.00137216	2.8626
ENSDARG00000024651	-0.514275	0.233681	0.0316667	1.4994
ENSDARG00000032606	-0.516736	0.166729	0.0060457	2.21855
ENSDARG00000018319	-0.518635	0.181179	0.00910574	2.04068
ENSDARG00000062081	-0.518856	0.243147	0.034311	1.46457
ENSDARG00000071772	-0.520559	0.19568	0.0139908	1.85416
ENSDARG00000057583	-0.521598	0.136462	0.000700831	3.15439
ENSDARG00000091293	-0.521684	0.133845	0.000572216	3.24244
ENSDARG00000079840	-0.522109	0.100235	3.68852e-06	5.43315
ENSDARG00000074636	-0.522354	0.182728	0.00913777	2.03916
ENSDARG00000102406	-0.522355	0.164621	0.00439689	2.35685
ENSDARG00000095904	-0.522775	0.1763	0.00729285	2.1371
ENSDARG00000043746	-0.52348	0.143175	0.00122941	2.9103
ENSDARG00000060309	-0.523622	0.105996	1.19329e-05	4.92325
ENSDARG00000063535	-0.523969	0.13175	0.000438872	3.35766
ENSDARG00000103013	-0.524294	0.114633	5.35311e-05	4.27139
ENSDARG00000068742	-0.525996	0.202335	0.0153941	1.81264
ENSDARG00000002411	-0.526149	0.136547	0.000655428	3.18347
ENSDARG00000099966	-0.527661	0.162434	0.00359297	2.44455
ENSDARG00000077686	-0.527763	0.16519	0.00411992	2.38511
ENSDARG00000014655	-0.528068	0.177944	0.0072068	2.14226
ENSDARG00000041137	-0.528896	0.157623	0.0027446	2.56152
ENSDARG00000079397	-0.529433	0.233622	0.0280793	1.55161
ENSDARG00000091916	-0.529765	0.217761	0.0208192	1.68154
ENSDARG00000042141	-0.530245	0.256595	0.0377566	1.42301
ENSDARG00000099621	-0.531053	0.221694	0.0220006	1.65757
ENSDARG00000037286	-0.531787	0.21741	0.0205628	1.68692
ENSDARG00000009499	-0.53263	0.125179	0.000172916	3.76217
ENSDARG00000012495	-0.533338	0.235352	0.0277242	1.55714
ENSDARG00000010773	-0.534008	0.252909	0.0344739	1.46251
ENSDARG00000070981	-0.53535	0.128503	0.000229639	3.63895
ENSDARG00000037652	-0.536106	0.227859	0.0239341	1.62098
ENSDARG00000104353	-0.537072	0.23487	0.0263219	1.57968
ENSDARG00000115956	-0.537989	0.166263	0.00365437	2.43719
ENSDARG00000021200	-0.538276	0.152272	0.00164522	2.78378
ENSDARG00000089372	-0.538361	0.231428	0.02403	1.61925
ENSDARG00000101665	-0.539143	0.154098	0.00180966	2.7424
ENSDARG00000061454	-0.539397	0.137053	0.000481987	3.31696
ENSDARG00000090232	-0.539487	0.278957	0.0429963	1.36657
ENSDARG00000101926	-0.539901	0.259676	0.0364892	1.43784
ENSDARG00000102506	-0.540071	0.231624	0.0239429	1.62082
ENSDARG00000110470	-0.543586	0.156741	0.00193857	2.71252
ENSDARG00000083325	-0.544236	0.217191	0.0178736	1.74779
ENSDARG00000073741	-0.545056	0.134264	0.000316183	3.50006
ENSDARG00000035133	-0.54515	0.130229	0.000211893	3.67388
ENSDARG00000006712	-0.545558	0.204734	0.0129299	1.8884
ENSDARG00000062469	-0.545909	0.102099	1.81739e-06	5.74055
ENSDARG00000021987	-0.546551	0.299537	0.0477964	1.3206
ENSDARG00000111110	-0.546743	0.115541	2.57297e-05	4.58957
ENSDARG00000061282	-0.547129	0.133252	0.000267496	3.57268
ENSDARG00000011171	-0.548142	0.114835	2.19587e-05	4.65839
ENSDARG00000079742	-0.548183	0.128128	0.000154418	3.8113
ENSDARG00000077052	-0.551513	0.130779	0.000186648	3.72898
ENSDARG00000032129	-0.551676	0.264191	0.0349725	1.45627
ENSDARG00000023678	-0.553271	0.271834	0.0375682	1.42518
ENSDARG00000075211	-0.55338	0.218513	0.0158482	1.80002
ENSDARG00000063568	-0.557406	0.173202	0.00411992	2.38511
ENSDARG00000020811	-0.557539	0.167263	0.00273122	2.56364
ENSDARG00000100012	-0.557602	0.287141	0.0410818	1.38635
ENSDARG00000069855	-0.558297	0.158886	0.00164522	2.78378
ENSDARG00000042623	-0.558525	0.129511	0.000139706	3.85478
ENSDARG00000088245	-0.562235	0.238256	0.0211521	1.67465
ENSDARG00000101220	-0.564926	0.18547	0.00566021	2.24717
ENSDARG00000104480	-0.566023	0.171728	0.00290126	2.53741
ENSDARG00000112930	-0.566171	0.138362	0.00027499	3.56068
ENSDARG00000103390	-0.566973	0.12625	6.82737e-05	4.16575
ENSDARG00000099465	-0.567017	0.19071	0.00656566	2.18272
ENSDARG00000105972	-0.568836	0.207213	0.0106203	1.97386
ENSDARG00000057000	-0.568992	0.159187	0.00134368	2.8717
ENSDARG00000063706	-0.569081	0.126357	6.37356e-05	4.19562
ENSDARG00000060222	-0.570619	0.168624	0.00230933	2.63651
ENSDARG00000083738	-0.572534	0.3198	0.0477964	1.3206
ENSDARG00000099437	-0.575241	0.214872	0.0122073	1.91338
ENSDARG00000100075	-0.576881	0.188266	0.00537465	2.26965
ENSDARG00000093803	-0.578504	0.305616	0.0432428	1.36409
ENSDARG00000044414	-0.579451	0.120816	1.98528e-05	4.70218
ENSDARG00000062727	-0.579583	0.156188	0.000899466	3.04602
ENSDARG00000057074	-0.581807	0.229998	0.0157179	1.80361
ENSDARG00000063299	-0.58251	0.138388	0.000180664	3.74313
ENSDARG00000061039	-0.582811	0.197184	0.00672475	2.17232
ENSDARG00000111388	-0.584127	0.231606	0.016163	1.79148
ENSDARG00000013343	-0.584464	0.176477	0.00273122	2.56364
ENSDARG00000078839	-0.586262	0.13525	0.000121745	3.91455
ENSDARG00000032238	-0.588141	0.284282	0.0335127	1.47479
ENSDARG00000010934	-0.590428	0.2581	0.0232317	1.63392
ENSDARG00000074804	-0.594532	0.221026	0.0111904	1.95116
ENSDARG00000075815	-0.596535	0.117184	5.3392e-06	5.27252
ENSDARG00000079160	-0.599128	0.234773	0.0149679	1.82484
ENSDARG00000103906	-0.599176	0.161124	0.000838345	3.07658
ENSDARG00000063068	-0.600265	0.131506	4.54292e-05	4.34266
ENSDARG00000100041	-0.600644	0.290654	0.032276	1.49112
ENSDARG00000009782	-0.600984	0.207686	0.00724572	2.13992
ENSDARG00000008976	-0.601917	0.10715	4.60239e-07	6.33702
ENSDARG00000061735	-0.602397	0.124536	1.57329e-05	4.80319
ENSDARG00000037145	-0.603185	0.116833	3.92089e-06	5.40662
ENSDARG00000116789	-0.606308	0.179945	0.00230933	2.63651
ENSDARG00000079161	-0.609024	0.143594	0.000154418	3.8113
ENSDARG00000006301	-0.610161	0.129075	2.39068e-05	4.62148
ENSDARG00000029668	-0.611822	0.110226	6.07024e-07	6.21679
ENSDARG00000054224	-0.61222	0.170781	0.00123157	2.90954
ENSDARG00000015199	-0.613997	0.139209	7.90853e-05	4.1019
ENSDARG00000104549	-0.615011	0.150507	0.000256202	3.59142
ENSDARG00000101687	-0.621067	0.222535	0.00868285	2.06134
ENSDARG00000100145	-0.621922	0.205354	0.00525194	2.27968
ENSDARG00000093165	-0.623987	0.300743	0.0318296	1.49717
ENSDARG00000043012	-0.627624	0.264264	0.0192086	1.7165
ENSDARG00000051915	-0.629777	0.358897	0.0453396	1.34352
ENSDARG00000091859	-0.630107	0.253156	0.0159305	1.79777
ENSDARG00000092799	-0.631129	0.257041	0.0168676	1.77295
ENSDARG00000016936	-0.633726	0.355726	0.0437678	1.35885
ENSDARG00000073732	-0.634062	0.105921	6.40712e-08	7.19334
ENSDARG00000040031	-0.635556	0.219287	0.00696298	2.15721
ENSDARG00000104110	-0.636336	0.260666	0.0169187	1.77163
ENSDARG00000101641	-0.636678	0.237598	0.0108283	1.96544
ENSDARG00000058015	-0.637008	0.15353	0.00020315	3.69218
ENSDARG00000087666	-0.639074	0.168691	0.000652642	3.18533
ENSDARG00000087461	-0.639326	0.200187	0.00352866	2.45239
ENSDARG00000068323	-0.641544	0.120032	1.52982e-06	5.81536
ENSDARG00000023886	-0.646468	0.3228	0.0328151	1.48393
ENSDARG00000106522	-0.647749	0.155826	0.000196929	3.70569
ENSDARG00000096420	-0.648649	0.326034	0.0344037	1.4634
ENSDARG00000079697	-0.649226	0.151946	0.0001378	3.86075
ENSDARG00000077996	-0.649818	0.250869	0.0125724	1.90058
ENSDARG00000097897	-0.65329	0.195632	0.00221855	2.65393
ENSDARG00000105561	-0.653297	0.365512	0.0438964	1.35757
ENSDARG00000092260	-0.654126	0.183279	0.0011998	2.92089
ENSDARG00000011190	-0.655933	0.275347	0.0184597	1.73377
ENSDARG00000071905	-0.657007	0.185327	0.00128886	2.88979
ENSDARG00000069139	-0.660302	0.220533	0.00537465	2.26965
ENSDARG00000015025	-0.660681	0.0987225	1.07214e-09	8.96975
ENSDARG00000058562	-0.661215	0.202233	0.0027446	2.56152
ENSDARG00000070522	-0.661265	0.175833	0.000674687	3.1709
ENSDARG00000117740	-0.661398	0.22285	0.00580087	2.23651
ENSDARG00000101338	-0.661931	0.164077	0.000283096	3.54807
ENSDARG00000105095	-0.664921	0.361896	0.0398059	1.40005
ENSDARG00000055099	-0.665942	0.165051	0.000281955	3.54982
ENSDARG00000079278	-0.667077	0.243906	0.00913777	2.03916
ENSDARG00000103229	-0.667141	0.261318	0.013434	1.8718
ENSDARG00000006524	-0.672541	0.0997569	8.09266e-10	9.09191
ENSDARG00000088475	-0.672751	0.131313	4.21328e-06	5.37538
ENSDARG00000104128	-0.672948	0.32463	0.0303193	1.51828
ENSDARG00000074635	-0.674166	0.243936	0.00838691	2.0764
ENSDARG00000078508	-0.674687	0.35657	0.0369454	1.43244
ENSDARG00000116179	-0.674704	0.352232	0.0369454	1.43244
ENSDARG00000104080	-0.676545	0.151232	6.04226e-05	4.2188
ENSDARG00000097414	-0.678881	0.394357	0.0456898	1.34018
ENSDARG00000097262	-0.686074	0.231236	0.00574425	2.24077
ENSDARG00000010583	-0.687862	0.116195	8.53353e-08	7.06887
ENSDARG00000091043	-0.691411	0.226511	0.00448926	2.34783
ENSDARG00000100000	-0.696741	0.178998	0.000435577	3.36093
ENSDARG00000063253	-0.700524	0.193854	0.00103795	2.98382
ENSDARG00000103454	-0.706834	0.407035	0.0442869	1.35373
ENSDARG00000117428	-0.709791	0.21901	0.00273122	2.56364
ENSDARG00000018061	-0.714451	0.229944	0.00396286	2.40199
ENSDARG00000098963	-0.715307	0.118228	4.10173e-08	7.38703
ENSDARG00000018923	-0.715348	0.208045	0.00140332	2.85284
ENSDARG00000036152	-0.715526	0.315261	0.020495	1.68835
ENSDARG00000078101	-0.715602	0.380266	0.0362016	1.44127
ENSDARG00000038793	-0.719061	0.439634	0.0468288	1.32949
ENSDARG00000095427	-0.719608	0.253873	0.00729285	2.1371
ENSDARG00000044431	-0.720867	0.19199	0.000659522	3.18077
ENSDARG00000067509	-0.723876	0.184342	0.000367858	3.43432
ENSDARG00000003989	-0.727862	0.10891	1.07214e-09	8.96975
ENSDARG00000069795	-0.732045	0.199228	0.00083587	3.07786
ENSDARG00000078060	-0.733162	0.190557	0.00046907	3.32876
ENSDARG00000090348	-0.73457	0.099753	1.22183e-11	10.913
ENSDARG00000100274	-0.735661	0.130817	3.69251e-07	6.43268
ENSDARG00000088493	-0.737581	0.194968	0.000587327	3.23112
ENSDARG00000098880	-0.739538	0.128648	1.94352e-07	6.71141
ENSDARG00000087341	-0.740657	0.245103	0.00462991	2.33443
ENSDARG00000073728	-0.74149	0.249183	0.00515831	2.28749
ENSDARG00000026925	-0.742585	0.299089	0.0136415	1.86514
ENSDARG00000093024	-0.743031	0.279097	0.00984227	2.0069
ENSDARG00000013763	-0.745597	0.238125	0.00351504	2.45407
ENSDARG00000077139	-0.746438	0.231348	0.00273122	2.56364
ENSDARG00000104995	-0.746547	0.403524	0.0372854	1.42846
ENSDARG00000102312	-0.760516	0.250932	0.00439689	2.35685
ENSDARG00000011422	-0.762267	0.308357	0.0139026	1.8569
ENSDARG00000087950	-0.765866	0.185681	0.000195409	3.70905
ENSDARG00000086256	-0.769647	0.238935	0.00273122	2.56364
ENSDARG00000001014	-0.770441	0.14701	2.08798e-06	5.68027
ENSDARG00000076624	-0.778129	0.134142	1.41139e-07	6.85035
ENSDARG00000001818	-0.779653	0.332642	0.0168921	1.77232
ENSDARG00000061052	-0.782683	0.181493	9.86731e-05	4.0058
ENSDARG00000101469	-0.786593	0.466398	0.0423809	1.37283
ENSDARG00000054290	-0.789406	0.125798	1.06525e-08	7.97255
ENSDARG00000019742	-0.790785	0.44946	0.0404319	1.39328
ENSDARG00000101256	-0.791283	0.196291	0.000247069	3.60718
ENSDARG00000033012	-0.792979	0.102994	1.02408e-12	11.9897
ENSDARG00000004539	-0.793037	0.353738	0.0205628	1.68692
ENSDARG00000099201	-0.802679	0.22508	0.00102471	2.9894
ENSDARG00000079614	-0.805543	0.413253	0.0305043	1.51564
ENSDARG00000104057	-0.808418	0.130981	1.85499e-08	7.73166
ENSDARG00000055713	-0.80981	0.151957	1.38428e-06	5.85878
ENSDARG00000015156	-0.810636	0.515647	0.0437744	1.35878
ENSDARG00000075706	-0.8141	0.180507	4.50123e-05	4.34667
ENSDARG00000088117	-0.816175	0.176245	2.67665e-05	4.57241
ENSDARG00000089297	-0.819569	0.24407	0.0018115	2.74196
ENSDARG00000062263	-0.821951	0.428235	0.0308303	1.51102
ENSDARG00000116197	-0.827453	0.551447	0.0468288	1.32949
ENSDARG00000014717	-0.828544	0.152813	8.75677e-07	6.05766
ENSDARG00000103847	-0.834538	0.25459	0.00220219	2.65715
ENSDARG00000076189	-0.835131	0.413495	0.0278658	1.55493
ENSDARG00000101495	-0.838023	0.262515	0.00282934	2.54831
ENSDARG00000062640	-0.838248	0.242122	0.00134368	2.8717
ENSDARG00000117326	-0.839437	0.225307	0.00064076	3.1933
ENSDARG00000098390	-0.845352	0.585541	0.0463736	1.33373
ENSDARG00000099458	-0.855564	0.161909	1.62373e-06	5.78949
ENSDARG00000061764	-0.85663	0.18372	2.23295e-05	4.65112
ENSDARG00000035605	-0.857448	0.247199	0.00136433	2.86508
ENSDARG00000116402	-0.857695	0.195639	6.9182e-05	4.16001
ENSDARG00000011602	-0.860119	0.210561	0.000198641	3.70193
ENSDARG00000079610	-0.870573	0.139737	1.21151e-08	7.91667
ENSDARG00000099262	-0.871414	0.261577	0.00187677	2.72659
ENSDARG00000098644	-0.871641	0.13961	1.1698e-08	7.93189
ENSDARG00000117548	-0.874852	0.429957	0.0271246	1.56664
ENSDARG00000068246	-0.879389	0.274869	0.00261128	2.58315
ENSDARG00000079307	-0.880551	0.133103	1.35072e-09	8.86944
ENSDARG00000101275	-0.887555	0.371886	0.0149968	1.824
ENSDARG00000074633	-0.888076	0.359801	0.0128591	1.89079
ENSDARG00000102146	-0.897238	0.332702	0.00800305	2.09674
ENSDARG00000038557	-0.898735	0.512099	0.0357117	1.44719
ENSDARG00000091760	-0.901797	0.352002	0.0109826	1.9593
ENSDARG00000103003	-0.911395	0.398681	0.0169956	1.76966
ENSDARG00000010764	-0.911417	0.246712	0.00064076	3.1933
ENSDARG00000100805	-0.91278	0.335148	0.00777173	2.10948
ENSDARG00000025011	-0.91499	0.141699	3.4384e-09	8.46364
ENSDARG00000017834	-0.915115	0.336836	0.0079944	2.09721
ENSDARG00000061391	-0.916429	0.457762	0.026337	1.57943
ENSDARG00000088039	-0.917134	0.602237	0.0441168	1.3554
ENSDARG00000054973	-0.920423	0.130482	9.06008e-11	10.0429
ENSDARG00000110545	-0.931106	0.2856	0.00218206	2.66113
ENSDARG00000113858	-0.932979	0.463426	0.0243168	1.61409
ENSDARG00000059866	-0.946293	0.17808	1.38428e-06	5.85878
ENSDARG00000078571	-0.947167	0.261829	0.000775723	3.11029
ENSDARG00000058090	-0.949157	0.292605	0.00225148	2.64753
ENSDARG00000058256	-0.949586	0.202617	2.04623e-05	4.68905
ENSDARG00000036985	-0.949915	0.140532	5.8734e-10	9.23111
ENSDARG00000100231	-0.953267	0.582711	0.0386111	1.41329
ENSDARG00000093646	-0.9623	0.535552	0.0326119	1.48662
ENSDARG00000018971	-0.973233	0.459953	0.0211521	1.67465
ENSDARG00000024561	-0.985481	0.223252	5.79664e-05	4.23682
ENSDARG00000090767	-0.986247	0.315519	0.003046	2.51627
ENSDARG00000092624	-0.98809	0.114905	1.10226e-15	14.9577
ENSDARG00000096217	-0.995644	0.243006	0.000178218	3.74905
ENSDARG00000016664	-0.996307	0.203942	8.53845e-06	5.06862
ENSDARG00000097539	-1.00366	0.65954	0.0412603	1.38447
ENSDARG00000059719	-1.00462	0.303731	0.00186805	2.72861
ENSDARG00000113690	-1.00561	0.275082	0.000699764	3.15505
ENSDARG00000117340	-1.00607	0.549847	0.030645	1.51364
ENSDARG00000102680	-1.00782	0.18857	1.12008e-06	5.95075
ENSDARG00000095106	-1.00792	0.517919	0.0282433	1.54908
ENSDARG00000112168	-1.00806	0.529039	0.0303572	1.51774
ENSDARG00000017004	-1.01366	0.209734	1.09577e-05	4.96028
ENSDARG00000093503	-1.02851	0.242036	0.000111863	3.95131
ENSDARG00000058416	-1.03428	0.606083	0.0339735	1.46886
ENSDARG00000102729	-1.0377	0.43624	0.0144549	1.83998
ENSDARG00000101374	-1.03997	0.444742	0.0156013	1.80684
ENSDARG00000116915	-1.04201	0.375126	0.00639803	2.19395
ENSDARG00000010756	-1.04829	0.622117	0.0365824	1.43673
ENSDARG00000088656	-1.05005	0.804477	0.0470752	1.32721
ENSDARG00000061951	-1.05112	0.198598	1.38428e-06	5.85878
ENSDARG00000031782	-1.05224	0.332978	0.00258871	2.58692
ENSDARG00000100533	-1.05621	0.411644	0.00975634	2.01071
ENSDARG00000091887	-1.05713	0.633852	0.0356937	1.44741
ENSDARG00000079986	-1.05788	0.387688	0.00710188	2.14863
ENSDARG00000086569	-1.06276	0.493319	0.0191876	1.71698
ENSDARG00000105592	-1.06818	0.297177	0.000786461	3.10432
ENSDARG00000104205	-1.06851	0.771236	0.045766	1.33946
ENSDARG00000095528	-1.07218	0.497575	0.0196959	1.70562
ENSDARG00000100584	-1.07317	0.493286	0.0185157	1.73246
ENSDARG00000021677	-1.07946	0.582308	0.0308701	1.51046
ENSDARG00000037177	-1.08255	0.165069	1.6699e-09	8.77731
ENSDARG00000078250	-1.08867	0.33109	0.00187677	2.72659
ENSDARG00000061791	-1.08959	0.577098	0.0283839	1.54693
ENSDARG00000109164	-1.09045	0.539074	0.0215757	1.66604
ENSDARG00000101321	-1.09083	0.33826	0.00229041	2.64009
ENSDARG00000086925	-1.09376	0.490166	0.0168207	1.77416
ENSDARG00000031745	-1.09441	0.451128	0.0120658	1.91844
ENSDARG00000096359	-1.09688	0.223143	7.25677e-06	5.13926
ENSDARG00000100065	-1.10062	0.401828	0.00693583	2.1589
ENSDARG00000101459	-1.10113	0.352255	0.00287687	2.54108
ENSDARG00000105630	-1.11258	0.536638	0.0226651	1.64464
ENSDARG00000098585	-1.11296	0.733285	0.044556	1.35109
ENSDARG00000116712	-1.12532	0.317574	0.000908875	3.0415
ENSDARG00000041092	-1.13002	0.639077	0.0346165	1.46072
ENSDARG00000102631	-1.13799	0.437504	0.00927939	2.03248
ENSDARG00000090734	-1.14296	0.379116	0.00368033	2.43411
ENSDARG00000077126	-1.14613	0.23054	5.54301e-06	5.25625
ENSDARG00000099352	-1.14694	0.34287	0.00163557	2.78633
ENSDARG00000011785	-1.14867	0.515896	0.0167801	1.77521
ENSDARG00000075022	-1.15055	0.732439	0.0407386	1.38999
ENSDARG00000090192	-1.15654	0.282299	0.000177741	3.75021
ENSDARG00000103474	-1.17426	0.345504	0.00133819	2.87348
ENSDARG00000092448	-1.1814	0.29349	0.0002131	3.67142
ENSDARG00000073915	-1.18297	0.660497	0.0320062	1.49477
ENSDARG00000099876	-1.1837	0.690984	0.0327793	1.4844
ENSDARG00000091025	-1.18581	0.558303	0.0205628	1.68692
ENSDARG00000075292	-1.19295	0.514018	0.0142195	1.84712
ENSDARG00000103143	-1.19547	0.37427	0.0023948	2.62073
ENSDARG00000069262	-1.19768	0.311202	0.000372397	3.42899
ENSDARG00000088048	-1.19905	0.510968	0.0125506	1.90133
ENSDARG00000117663	-1.20534	0.396654	0.00349655	2.45636
ENSDARG00000098406	-1.22407	0.632534	0.0261267	1.58292
ENSDARG00000099276	-1.23171	0.274318	4.04015e-05	4.3936
ENSDARG00000038898	-1.23272	0.538943	0.0158743	1.7993
ENSDARG00000101073	-1.23826	0.570637	0.0187324	1.72741
ENSDARG00000086418	-1.24263	0.280775	4.73303e-05	4.32486
ENSDARG00000112487	-1.24762	0.601008	0.0211521	1.67465
ENSDARG00000117603	-1.25615	0.637655	0.024923	1.6034
ENSDARG00000002445	-1.25775	0.463826	0.00724572	2.13992
ENSDARG00000102540	-1.29028	0.25639	4.21328e-06	5.37538
ENSDARG00000087575	-1.29467	0.67446	0.0251331	1.59975
ENSDARG00000103133	-1.3003	0.52874	0.0118138	1.92761
ENSDARG00000101351	-1.30454	0.741572	0.0320011	1.49483
ENSDARG00000101213	-1.33166	0.713346	0.02891	1.53895
ENSDARG00000117707	-1.33547	0.593266	0.0162172	1.79003
ENSDARG00000105463	-1.33662	0.580661	0.0144382	1.84049
ENSDARG00000103265	-1.3651	0.660142	0.0215757	1.66604
ENSDARG00000078349	-1.37382	0.571327	0.012139	1.91582
ENSDARG00000056443	-1.3765	0.726591	0.0281698	1.55022
ENSDARG00000098177	-1.37958	0.419454	0.00175298	2.75622
ENSDARG00000033029	-1.38123	0.290096	1.2601e-05	4.89959
ENSDARG00000099318	-1.40632	0.791283	0.0300009	1.52287
ENSDARG00000008019	-1.40669	0.478427	0.00452589	2.3443
ENSDARG00000095533	-1.41144	0.79299	0.0275467	1.55993
ENSDARG00000079420	-1.43016	0.775007	0.030652	1.51354
ENSDARG00000079269	-1.43904	0.579748	0.0106382	1.97313
ENSDARG00000042953	-1.43958	0.425373	0.00134519	2.87122
ENSDARG00000110878	-1.4406	0.430556	0.00140604	2.852
ENSDARG00000056836	-1.46238	0.683319	0.0170514	1.76824
ENSDARG00000104007	-1.49167	0.639277	0.0120658	1.91844
ENSDARG00000077220	-1.50479	0.634889	0.0117022	1.93173
ENSDARG00000104804	-1.50639	0.717051	0.0208723	1.68043
ENSDARG00000105570	-1.50785	0.539338	0.00595166	2.22536
ENSDARG00000091561	-1.51075	0.797956	0.0288673	1.53959
ENSDARG00000039863	-1.51635	0.718098	0.0205984	1.68617
ENSDARG00000067859	-1.52269	0.333974	2.60422e-05	4.58432
ENSDARG00000117813	-1.5281	0.413434	0.000519731	3.28422
ENSDARG00000102904	-1.54764	0.61717	0.00864089	2.06344
ENSDARG00000106998	-1.56282	0.649425	0.0125066	1.90286
ENSDARG00000074607	-1.5748	0.819894	0.0233452	1.6318
ENSDARG00000077697	-1.58845	0.71078	0.0156269	1.80613
ENSDARG00000113877	-1.59241	0.469261	0.00140604	2.852
ENSDARG00000094890	-1.61586	0.288916	3.40611e-07	6.46774
ENSDARG00000051939	-1.62448	0.841708	0.0216968	1.6636
ENSDARG00000099377	-1.63136	0.552184	0.00403704	2.39394
ENSDARG00000078167	-1.65482	0.603022	0.00583401	2.23403
ENSDARG00000113044	-1.66954	0.517306	0.00177453	2.75092
ENSDARG00000102212	-1.6702	0.362345	2.32652e-05	4.63329
ENSDARG00000036422	-1.67628	0.717617	0.0125666	1.90078
ENSDARG00000090953	-1.69282	0.793387	0.0183639	1.73603
ENSDARG00000117159	-1.69797	0.546703	0.00259533	2.58581
ENSDARG00000037758	-1.70711	0.701402	0.0114218	1.94227
ENSDARG00000094980	-1.72275	0.722842	0.0142235	1.84699
ENSDARG00000078309	-1.76539	0.496231	0.00072493	3.1397
ENSDARG00000114030	-1.77107	0.804114	0.0185157	1.73246
ENSDARG00000103946	-1.77474	0.59802	0.00368033	2.43411
ENSDARG00000102873	-1.79947	0.33107	6.02885e-07	6.21977
ENSDARG00000088836	-1.81471	0.730001	0.00850056	2.07055
ENSDARG00000090033	-1.85815	0.607681	0.00282775	2.54856
ENSDARG00000070229	-1.93118	0.772535	0.0106557	1.97242
ENSDARG00000042780	-1.95983	0.675328	0.00368033	2.43411
ENSDARG00000078474	-1.96794	0.545295	0.000690783	3.16066
ENSDARG00000095065	-2.0084	0.822477	0.0106615	1.97218
ENSDARG00000111637	-2.02305	0.787459	0.00973581	2.01163
ENSDARG00000088377	-2.02339	0.587939	0.0010337	2.9856
ENSDARG00000113045	-2.03896	0.425859	9.5424e-06	5.02034
ENSDARG00000117216	-2.13684	0.613906	0.00125177	2.90247
ENSDARG00000116510	-2.17913	0.56235	0.000267496	3.57268
ENSDARG00000101189	-2.25036	0.94759	0.0147088	1.83242
ENSDARG00000103436	-2.40551	0.452028	9.29226e-07	6.03188
ENSDARG00000117818	-2.41445	0.580841	0.000107024	3.97052
ENSDARG00000101916	-2.41843	1.04129	0.0138794	1.85763
ENSDARG00000077706	-2.62202	0.740083	0.000906239	3.04276
ENSDARG00000019686	-2.72028	0.666792	0.000154418	3.8113
ENSDARG00000100341	-2.82246	0.897617	0.00304138	2.51693
ENSDARG00000102288	-2.8291	0.916766	0.00456695	2.34037
ENSDARG00000091800	-2.84401	1.07386	0.0107152	1.97
ENSDARG00000117735	-2.84796	0.87611	0.00205387	2.68743
ENSDARG00000117421	-2.87629	0.634936	2.82885e-05	4.54839
ENSDARG00000117470	-3.22788	1.00985	0.00240791	2.61836
ENSDARG00000117450	-3.36691	0.855331	0.000465811	3.33179
ENSDARG00000109678	-5.4339	1.3571	0.000237353	3.62461
