# Supplementary material for: Long-Term Benefits of TUDCA Supplement in ARSACS Zebrafish Model
Source: Research Square preprint supplement (doi:10.21203/rs.3.rs-5957432/v1), 2025-04-16
Supplement: Supplementary file 2 [file e71c4cc5a53fdad1743b15a3.xlsx]

## Sheet: Sheet 1
Row.names	TUDCA_brain_3	TUDCA_brain_1	TUDCA_brain_2	brain_wt4	brain_wt1	brain_wt3	baseMean	log2FoldChange	lfcSE	pvalue	padj	symbol	entrezgene	refseq	Gene.description	Gene.name	Chromosome.scaffold.name	GO.annotation	Var.20
ENSDARG00000043854	10.82	7.53	10.05	8.44	10.23	9.26	230.51	0.000191118	0.161077	0.999813	0.999813	ppil4	554886		peptidylprolyl isomerase (cyclophilin)-like 4 [Source:ZFIN	Acc:ZDB-GENE-030131-6251]	ppil4	20	() ): :
ENSDARG00000099518	1.86	1.27	1.61	1.4	1.91	1.32	46.9814	0.000218891	0.206235	0.99973	0.999776	si:ch211-119e14.1	560599				7	GO:0016020(cellular_component) ): :membrane,GO:0031514(cellular_component) ): :motile cilium
ENSDARG00000044102	6.55	8.48	5.7	6.08	7.7	6.6	45.1185	0.000294374	0.206301	0.999671	0.999763	znf593	559352		zinc finger protein 593 [Source:ZFIN	Acc:ZDB-GENE-040426-1789]	znf593	17	() ): :
ENSDARG00000077471	2.13	2.31	2.74	1.42	3.2	2.35	29.0334	0.000315897	0.218822	0.999567	0.999706	hmces	560402		5-hydroxymethylcytosine binding, ES cell specific [Source:ZFIN	Acc:ZDB-GENE-070620-10]	hmces	11	() ): :
ENSDARG00000034344	76.43	80.28	80.93	81.72	64.41	90.14	3882.46	0.000253366	0.111488	0.999452	0.999637	pcdh19	555688		protocadherin 19 [Source:ZFIN	Acc:ZDB-GENE-030131-4218]	pcdh19	14	() ): :
ENSDARG00000045910	35.75	34.69	30.67	36.03	27.86	36.63	510.118	0.000369136	0.137471	0.999394	0.999625	tmem181	557799		transmembrane protein 181 [Source:ZFIN	Acc:ZDB-GENE-060503-309]	tmem181	4	() ): :
ENSDARG00000037555	5.14	4.29	3.9	5.76	3.34	4.12	87.6846	0.000399295	0.193295	0.999129	0.99946	atoh8	561606		atonal bHLH transcription factor 8 [Source:NCBI gene (formerly Entrezgene)	Acc:561606]	atoh8	14	() ): :
ENSDARG00000045708	0.99	0.94	0.45	0.82	0.31	1.31	13.5395	0.000136584	0.232432	0.999163	0.99946	adm2a	403114		adrenomedullin 2a [Source:ZFIN	Acc:ZDB-GENE-041210-100]	adm2a	4	() ): :
ENSDARG00000056713	2.38	1.97	2.09	2.48	1.44	2.53	54.78	0.000387871	0.201664	0.999059	0.99946	pskh1	554840		protein serine kinase H1 [Source:ZFIN	Acc:ZDB-GENE-050119-1]	pskh1	18	() ): :
ENSDARG00000061378	10.76	10.02	11.92	8.83	11.68	11.76	319.263	3.85321e-05	0.146127	0.999059	0.99946	smg8	567424		SMG8 nonsense mediated mRNA decay factor [Source:HGNC Symbol	Acc:HGNC:25551]	SMG8	10	GO:0000184(biological_process) ): :nuclear-transcribed mRNA catabolic process, nonsense-mediated decay
ENSDARG00000117236	28.97	25.44	29.03	28.27	21.82	33.03	166.04	0.000893215	0.162314	0.999183	0.99946	ube2o	101883975				6	() ): :
ENSDARG00000095970	2.8	1.66	1.55	1.16	2.33	2.46	11.9938	0.000108341	0.231222	0.998951	0.999459						22	() ): :
ENSDARG00000052344	3.3	4.34	3.61	3.1	3.45	4.65	98.1084	6.24743e-05	0.183032	0.998878	0.999432	tbl3	492761		transducin beta like 3 [Source:ZFIN	Acc:ZDB-GENE-041114-104]	tbl3	3	() ): :
ENSDARG00000086391	0.33	0.82	0.4	0.41	0.51	0.62	10.3436	0.000300222	0.23287	0.998831	0.999432	cald1b	563892		caldesmon 1b [Source:ZFIN	Acc:ZDB-GENE-090313-229]	cald1b	25	() ): :
ENSDARG00000104118	1.51	1.97	1.96	2.63	1.36	1.37	95.9614	0.000777665	0.199424	0.998809	0.999432	antxr2a	557239		ANTXR cell adhesion molecule 2a [Source:ZFIN	Acc:ZDB-GENE-060526-14]	antxr2a	5	() ): :
ENSDARG00000104726	65.81	66.6	74.12	74.78	63.87	65.03	223.605	0.000526513	0.149495	0.998583	0.999276	si:ch211-162e15.3	563358				2	() ): :
ENSDARG00000076510	2.02	1.66	1.83	1.94	1.25	2.34	7.68266	3.87727e-05	0.234447	0.998394	0.999243	fgf22	100005852		fibroblast growth factor 22 [Source:ZFIN	Acc:ZDB-GENE-050208-380]	fgf22	22	() ): :
ENSDARG00000076939	22.49	20.05	25.6	25.1	17.71	24.78	623.317	-5.50877e-05	0.138236	0.998427	0.999243	znf451	557758				13	() ): :,GO:0005634(cellular_component) ): :nucleus,GO:0045944(biological_process) ): :positive regulation of transcription by RNA polymerase II,GO:0016874(molecular_function) ): :ligase activity
ENSDARG00000100617	0.48	1.2	0.44	0.4	1.2	0.42	4.09252	2.69697e-05	0.239697	0.998503	0.999243						3	() ): :
ENSDARG00000116334	2.3	0.81	0.46	1.89	0.95	0.67	4.39634	0.00022567	0.239628	0.998471	0.999243	tmem17	568092		transmembrane protein 17 [Source:ZFIN	Acc:ZDB-GENE-070615-15]	tmem17	25	() ): :
ENSDARG00000018856	122.51	113.86	128.14	120.02	116.34	123.78	1482.84	-9.13598e-05	0.0995646	0.998246	0.999204	dclk1a	558997		doublecortin-like kinase 1a [Source:ZFIN	Acc:ZDB-GENE-061013-124]	dclk1a	10	() ): :
ENSDARG00000027279	22.71	17.05	15.18	17.87	17.28	19.21	517.675	-8.08636e-05	0.150037	0.998218	0.999204	numb	692064		NUMB endocytic adaptor protein [Source:ZFIN	Acc:ZDB-GENE-060422-1]	numb	17	() ): :,GO:0005737(cellular_component) ): :cytoplasm,GO:0016323(cellular_component) ): :basolateral plasma membrane,GO:0031410(cellular_component) ): :cytoplasmic vesicle,GO:0005886(cellular_component) ): :plasma membrane,GO:0007368(biological_process) ): :determination of left/right symmetry,GO:0007399(biological_process) ): :nervous system development,GO:0060319(biological_process) ): :primitiv…
ENSDARG00000055206	14.78	17.71	21.35	22.98	16.66	13.02	116.282	0.000537221	0.190545	0.99828	0.999204	dtnbp1b	556784		dystrobrevin binding protein 1b [Source:ZFIN	Acc:ZDB-GENE-060503-889]	dtnbp1b	19	() ): :
ENSDARG00000028786	22.62	23.03	24.32	23.56	23.1	22.26	297.269	0.000461275	0.13801	0.998025	0.999088	chst12a	407076		carbohydrate (chondroitin 4) sulfotransferase 12a [Source:ZFIN	Acc:ZDB-GENE-081022-13]	chst12a	3	() ): :
ENSDARG00000077799	32.31	28.64	41.12	60.07	17.39	22.57	619.759	0.000171592	0.224737	0.997817	0.999054	egr4	795099		early growth response 4 [Source:ZFIN	Acc:ZDB-GENE-080204-90]	egr4	23	GO:0005634(cellular_component) ): :nucleus,GO:0005737(cellular_component) ): :cytoplasm,GO:0000978(molecular_function) ): :RNA polymerase II cis-regulatory region sequence-specific DNA binding,GO:0006357(biological_process) ): :regulation of transcription by RNA polymerase II,GO:0000981(molecular_function) ): :DNA-binding transcription factor activity, RNA polymerase II-specific,GO:0048511(biolog…
ENSDARG00000078333	4.65	6.37	5.5	5.39	5.18	5.79	35.8533	-3.62038e-05	0.20853	0.997945	0.999054	tmem234	568275		transmembrane protein 234 [Source:ZFIN	Acc:ZDB-GENE-090313-326]	tmem234	13	() ): :
ENSDARG00000090697	48.12	49.08	54.28	49.27	56.43	42.79	641.608	-0.000116603	0.142395	0.997856	0.999054	eif3ea	325102		eukaryotic translation initiation factor 3, subunit E, a [Source:ZFIN	Acc:ZDB-GENE-030131-3827]	eif3ea	16	() ): :
ENSDARG00000102294	46.02	39.69	44.82	41.44	40.13	47.83	988.064	2.03662e-06	0.108944	0.997905	0.999054	fbxo11a	777607		F-box protein 11a [Source:ZFIN	Acc:ZDB-GENE-061103-70]	fbxo11a	13	() ): :
ENSDARG00000116393	21.17	19.61	17.38	21.25	14.55	22.36	38.1625	-5.82706e-05	0.208199	0.997735	0.999029						17	() ): :
ENSDARG00000013227	0.49	0.81	0.44	0.5	0.42	0.84	7.03838	-3.55937e-05	0.235723	0.997412	0.998781	glulc	566165		glutamate-ammonia ligase (glutamine synthase) c [Source:ZFIN	Acc:ZDB-GENE-060929-540]	glulc	21	() ): :
ENSDARG00000104105	4.76	4.88	5.97	4.33	5.26	5.83	170.96	-0.000185403	0.160798	0.997441	0.998781	ttf2	555382				9	() ): :,GO:0046872(molecular_function) ): :metal ion binding,GO:0005524(molecular_function) ): :ATP binding,GO:0005634(cellular_component) ): :nucleus,GO:0008270(molecular_function) ): :zinc ion binding,GO:0008094(molecular_function) ): :ATP-dependent activity, acting on DNA,GO:0006281(biological_process) ): :DNA repair,GO:0140658(molecular_function) ): :ATP-dependent chromatin remodeler activity…
ENSDARG00000042707	1.15	0.56	0.47	0.38	0.86	0.92	11.5154	-3.52958e-05	0.23317	0.997219	0.998724	gjb8	404725		gap junction protein beta 8 [Source:ZFIN	Acc:ZDB-GENE-040406-1]	gjb8	9	() ): :
ENSDARG00000053695	4.71	5.93	6.43	5.01	6.32	5.41	76.0312	-0.000163377	0.189694	0.997291	0.998724	zgc:162948	797781		zgc:162948 [Source:ZFIN	Acc:ZDB-GENE-070424-46]	zgc:162948	4	() ): :
ENSDARG00000056765	0.62	0.25	1.69	0	1.17	1.37	6.11161	-4.51256e-05	0.240056	0.996988	0.998724	ela2l	334304		elastase 2 like [Source:ZFIN	Acc:ZDB-GENE-040511-1]	ela2l	8	() ): :
ENSDARG00000079080	2.54	4.5	3.71	4.13	2.99	3.53	25.467	0.000594916	0.218903	0.996941	0.998724	etfbkmt	100005455		electron transfer flavoprotein subunit beta lysine methyltransferase [Source:ZFIN	Acc:ZDB-GENE-111107-1]	etfbkmt	25	() ): :
ENSDARG00000079516	11.36	11.11	12.35	12.63	14.55	6.54	217.495	0.000724073	0.191048	0.997122	0.998724	cisd1	393577		CDGSH iron sulfur domain 1 [Source:ZFIN	Acc:ZDB-GENE-040426-1162]	cisd1	13	() ): :
ENSDARG00000089780	0.63	0.43	0.6	0.5	0.34	0.83	15.4657	0.00047597	0.227646	0.997259	0.998724	si:dkey-288a3.2	101886857				17	() ): :
ENSDARG00000095339	0.27	0.47	0.26	0.61	0.14	0.26	18.2434	0.000514712	0.230978	0.997029	0.998724	col23a1a	567373				14	() ): :
ENSDARG00000098799	0.8	0.16	0.66	0.36	0.48	0.77	6.83131	0.000382769	0.237024	0.997119	0.998724	si:ch211-194m7.5	101883669				25	() ): :
ENSDARG00000104647	12.9	9.74	11.94	13.62	9.66	10.93	141.021	-0.000200694	0.173441	0.997172	0.998724	surf4	394102		surfeit 4 [Source:NCBI gene (formerly Entrezgene)	Acc:394102]	surf4	5	() ): :
ENSDARG00000013292	23.16	19.05	28.11	30.25	22.05	16.28	228.627	0.00123078	0.182524	0.996829	0.998678	tmem179aa	445310		transmembrane protein 179a, genome duplicate A [Source:NCBI gene (formerly Entrezgene)	Acc:445310]	tmem179aa	20	() ): :
ENSDARG00000088899	18.98	17.13	17.5	15.12	16.2	22.07	786.836	0.000212807	0.130444	0.996761	0.998655	ralgapb	559303		Ral GTPase activating protein non-catalytic subunit beta [Source:HGNC Symbol	Acc:HGNC:29221]	RALGAPB	6	() ): :,GO:0005096(molecular_function) ): :GTPase activator activity,GO:0051056(biological_process) ): :regulation of small GTPase mediated signal transduction
ENSDARG00000094514	11.86	10.25	10.7	10.51	9.42	12.68	148.436	-0.000301763	0.16234	0.996651	0.998591	si:dkey-7l6.3	570117				2	GO:0005634(cellular_component) ): :nucleus,() ): :
ENSDARG00000036245	0.32	0.54	0.66	0.58	0.31	0.64	6.44277	0.00042182	0.236411	0.996586	0.998572	wipf3	368364				19	() ): :
ENSDARG00000076560	102.99	99.19	106.21	101.76	94.53	108.92	2398.65	0.00047303	0.0915173	0.996556	0.998572	apbb1	565164				10	() ): :,GO:0005737(cellular_component) ): :cytoplasm,GO:0006355(biological_process) ): :regulation of DNA-templated transcription,GO:0005634(cellular_component) ): :nucleus,GO:0001540(molecular_function) ): :amyloid-beta binding
ENSDARG00000004051	0.11	0.18	0.18	0.08	0.18	0.2	6.70661	-0.000122605	0.236144	0.996473	0.998555	cyp7a1b	559097				7	() ): :
ENSDARG00000054414	0.51	0.46	0.23	0.32	0.32	0.56	4.37618	0.000363213	0.238719	0.996476	0.998555	spata17	799739		spermatogenesis associated 17 [Source:ZFIN	Acc:ZDB-GENE-111214-1]	spata17	17	GO:0005737(cellular_component) ): :cytoplasm,GO:0000278(biological_process) ): :mitotic cell cycle,GO:0005516(molecular_function) ): :calmodulin binding,GO:0000922(cellular_component) ): :spindle pole,GO:0007051(biological_process) ): :spindle organization,GO:0051295(biological_process) ): :establishment of meiotic spindle localization,() ): :
ENSDARG00000097758	1.27	1.33	5.75	5.46	1.16	1.64	4.10672	-7.81246e-05	0.240238	0.996383	0.998554						16	() ): :
ENSDARG00000023712	18.25	18.54	20.41	24.01	17.25	14.93	846.965	-0.000325124	0.155435	0.996173	0.99839	mao	404730		monoamine oxidase [Source:NCBI gene (formerly Entrezgene)	Acc:404730]	mao	9	() ): :
ENSDARG00000103679	2.45	1.51	2.01	2.06	2.26	1.51	137.426	0.000854731	0.187073	0.996128	0.99839	bmp16	100329171		bone morphogenetic protein 16 [Source:ZFIN	Acc:ZDB-GENE-100115-1]	bmp16	18	() ): :
ENSDARG00000117239	0.82	0.87	1.78	0.82	1.1	1.38	7.96316	0.000513453	0.234713	0.99617	0.99839	LOC100004075	100004075				8	() ): :
ENSDARG00000007244	18.09	18.75	20.58	20.41	17.28	19.03	198.448	0.000914033	0.150841	0.995123	0.998337	acp2	503759		acid phosphatase 2, lysosomal [Source:ZFIN	Acc:ZDB-GENE-050306-40]	acp2	7	() ): :
ENSDARG00000008287	9.05	6.53	9.24	5.46	10.61	8.35	121.203	-0.000394257	0.191769	0.995398	0.998337	fam114a1	560911		family with sequence similarity 114 member A1 [Source:ZFIN	Acc:ZDB-GENE-070410-52]	fam114a1	1	() ): :
ENSDARG00000009610	2.09	2.14	2.24	2.54	1.61	2.33	82.2053	-0.000401421	0.187306	0.99566	0.998337	rgs12a	570516				7	GO:0005634(cellular_component) ): :nucleus,GO:0005737(cellular_component) ): :cytoplasm,GO:0007165(biological_process) ): :signal transduction,GO:0005096(molecular_function) ): :GTPase activator activity,GO:0005886(cellular_component) ): :plasma membrane,GO:0030695(molecular_function) ): :GTPase regulator activity,GO:0008277(biological_process) ): :regulation of G protein-coupled receptor signali…
ENSDARG00000010524	8.62	10.33	9.27	9.77	8.26	9.95	250.964	0.000731313	0.14777	0.995982	0.998337	si:ch211-282j22.3	562939				21	GO:0016787(molecular_function) ): :hydrolase activity,GO:0016020(cellular_component) ): :membrane,GO:0046872(molecular_function) ): :metal ion binding,GO:0005509(molecular_function) ): :calcium ion binding,GO:0005783(cellular_component) ): :endoplasmic reticulum,GO:0016798(molecular_function) ): :hydrolase activity, acting on glycosyl bonds,GO:0005975(biological_process) ): :carbohydrate metaboli…
ENSDARG00000015628	4.64	4.43	4.9	4.75	4.61	4.38	52.0852	0.00091191	0.196433	0.995593	0.998337	psmd10	403085		proteasome 26S subunit, non-ATPase 10 [Source:ZFIN	Acc:ZDB-GENE-050112-1]	psmd10	14	() ): :
ENSDARG00000016307	6.68	6.45	7.27	6.21	7.29	6.52	114.9	0.00100004	0.171458	0.995715	0.998337	mrpl46	436791		mitochondrial ribosomal protein L46 [Source:ZFIN	Acc:ZDB-GENE-040718-224]	mrpl46	7	() ): :
ENSDARG00000024431	2.32	2.14	2.68	0.77	3.04	3.27	14.2641	-0.000192489	0.230902	0.995518	0.998337	ets1	280651		v-ets avian erythroblastosis virus E26 oncogene homolog 1 [Source:ZFIN	Acc:ZDB-GENE-021115-5]	ets1	18	() ): :
ENSDARG00000033597	38.11	33.43	39.71	39.61	37.82	31.69	949.467	-0.000540316	0.134381	0.995564	0.998337	api5	321676		apoptosis inhibitor 5 [Source:ZFIN	Acc:ZDB-GENE-030131-395]	api5	25	() ): :
ENSDARG00000034801	3.38	3.22	2.26	2.26	3.14	3.37	101.441	0.000937286	0.189235	0.995531	0.998337				myosin light chain kinase [Source:HGNC Symbol	Acc:HGNC:7590]	MYLK	9	() ): :
ENSDARG00000037061	7.73	3.14	6.58	5.33	6.15	5.68	103.671	-0.000316085	0.199215	0.995829	0.998337	aldh9a1b	399481		aldehyde dehydrogenase 9 family, member A1b [Source:NCBI gene (formerly Entrezgene)	Acc:399481]	aldh9a1b	2	() ): :
ENSDARG00000037958	24.79	30.35	27.05	26.52	29.52	24.7	205.761	0.000802488	0.160851	0.995952	0.998337	nosip	492793		nitric oxide synthase interacting protein [Source:ZFIN	Acc:ZDB-GENE-041114-146]	nosip	3	() ): :
ENSDARG00000043242	0.43	0.79	0.39	0.38	0.7	0.49	8.10394	0.000531802	0.234897	0.995923	0.998337	si:dkey-222f2.1	568321				22	GO:0005882(cellular_component) ): :intermediate filament,GO:0045095(cellular_component) ): :keratin filament,GO:0045109(biological_process) ): :intermediate filament organization,GO:0030280(molecular_function) ): :structural constituent of skin epidermis,GO:0031424(biological_process) ): :keratinization
ENSDARG00000043938	9.62	8.96	8.62	8.24	9.61	8.89	112.165	0.000839488	0.173075	0.995979	0.998337	lrrc57	436900		leucine rich repeat containing 57 [Source:ZFIN	Acc:ZDB-GENE-040718-372]	lrrc57	17	() ): :
ENSDARG00000045105	8.08	9.78	10.21	8.94	8.62	10.23	184.271	0.000826035	0.155143	0.995692	0.998337	foxn2b	550127		forkhead box N2b [Source:ZFIN	Acc:ZDB-GENE-050417-1]	foxn2b	12	() ): :
ENSDARG00000054320	155.48	147.97	141.99	139.79	149.24	151.3	4349.07	0.00105049	0.103453	0.995319	0.998337	ap2a1	558153		adaptor related protein complex 2 subunit alpha 1 [Source:HGNC Symbol	Acc:HGNC:561]	AP2A1	3	() ): :
ENSDARG00000054937	4.05	3.18	3.03	3.83	3.72	2.43	32.0007	-0.00036931	0.215119	0.995191	0.998337	badb	58100		BCL2 associated agonist of cell death b [Source:ZFIN	Acc:ZDB-GENE-000616-1]	badb	7	() ): :
ENSDARG00000068365	5.04	4.6	3.57	3.6	5.02	4.35	89.2941	0.000979732	0.190067	0.995167	0.998337	lmx1bb	554360		LIM homeobox transcription factor 1, beta b [Source:ZFIN	Acc:ZDB-GENE-050114-2]	lmx1bb	8	() ): :
ENSDARG00000070396	2.43	5.26	0.55	3.09	2.25	2.93	51.2179	0.000788102	0.228074	0.995318	0.998337	serpinb1l2	568898		serpin peptidase inhibitor, clade B (ovalbumin), member 1, like 2 [Source:ZFIN	Acc:ZDB-GENE-041001-117]	serpinb1l2	20	() ): :
ENSDARG00000095455	14.38	12.12	8.34	6.39	12.33	16.15	48.5538	-0.000357956	0.213474	0.995146	0.998337						22	() ): :
ENSDARG00000098397	0.72	0.03	0.75	0.39	0.31	0.8	32.596	0.000656635	0.233746	0.995821	0.998337	LOC101882579	101882579				3	() ): :
ENSDARG00000103926	6.6	6.95	10.95	5.76	7.93	10.63	191.306	-0.000454504	0.182377	0.99522	0.998337	inpp5e	606579		inositol polyphosphate-5-phosphatase E [Source:ZFIN	Acc:ZDB-GENE-050809-23]	inpp5e	5	() ): :
ENSDARG00000105807	0.95	1.05	0.76	1.54	0.59	0.53	4.06547	-0.000191154	0.239298	0.995	0.998337						7	() ): :
ENSDARG00000109844	5.41	4.27	4.4	3.8	6.5	3.48	37.7863	0.00083369	0.214812	0.995555	0.998337	si:dkey-153k10.6	100536018				4	() ): :
ENSDARG00000011615	0.47	0.25	0.25	0.18	0.17	0.66	7.8392	-0.000211043	0.236595	0.994841	0.998259	mybpc3	556489		myosin binding protein C3 [Source:ZFIN	Acc:ZDB-GENE-070112-2362]	mybpc3	7	() ): :
ENSDARG00000008502	37.59	36.67	41.44	43.36	39.54	30.32	320.947	0.00104886	0.158058	0.994551	0.998199	pno1	393520		partner of NOB1 homolog [Source:ZFIN	Acc:ZDB-GENE-040426-1419]	pno1	13	() ): :,GO:0003676(molecular_function) ): :nucleic acid binding,GO:0003723(molecular_function) ): :RNA binding
ENSDARG00000032737	176.63	131.36	142.37	129.05	134.36	185.55	1873.08	-0.000531312	0.135858	0.994713	0.998199	gria3a	170452		glutamate receptor, ionotropic, AMPA 3a [Source:ZFIN	Acc:ZDB-GENE-020125-5]	gria3a	5	() ): :
ENSDARG00000100959	1.99	2.47	4.91	2.08	2.18	5.18	44.8273	-0.000343038	0.219264	0.994735	0.998199						4	() ): :
ENSDARG00000101431	12.74	11.88	10.89	11.48	12.24	11.2	161.155	0.000549791	0.162797	0.994596	0.998199	gas8	323260		growth arrest-specific 8 [Source:ZFIN	Acc:ZDB-GENE-030131-1980]	gas8	18	() ): :
ENSDARG00000104993	1.98	1.19	1.53	0	1.83	2.94	5.43299	0.000493942	0.239856	0.994628	0.998199						11	() ): :
ENSDARG00000117729	91.37	74.82	73.44	66.56	80.6	90.82	1244.63	-0.00058914	0.132481	0.994712	0.998199						KZ116019.1	() ): :
ENSDARG00000019778	258.74	275.03	285.39	259.16	297.57	248.09	1807.64	0.000820152	0.124089	0.994356	0.998097	rps6	445028		ribosomal protein S6 [Source:ZFIN	Acc:ZDB-GENE-040801-8]	rps6	1	() ): :
ENSDARG00000024744	53.01	50.03	63.22	51.33	56.36	56	2121.82	0.000556542	0.111404	0.994232	0.998051	dpp6b	566832		dipeptidyl-peptidase 6b [Source:ZFIN	Acc:ZDB-GENE-070705-88]	dpp6b	2	GO:0006508(biological_process) ): :proteolysis,GO:0016020(cellular_component) ): :membrane,GO:0005886(cellular_component) ): :plasma membrane,GO:0008076(cellular_component) ): :voltage-gated potassium channel complex,GO:0008236(molecular_function) ): :serine-type peptidase activity,GO:0004177(molecular_function) ): :aminopeptidase activity,GO:0015459(molecular_function) ): :potassium channel regu…
ENSDARG00000098618	3.44	3.97	3.8	3.17	4.66	3.09	118.425	0.00109543	0.184934	0.994265	0.998051	erap2	100144556		endoplasmic reticulum aminopeptidase 2 [Source:ZFIN	Acc:ZDB-GENE-080402-6]	erap2	5	() ): :
ENSDARG00000011683	3.24	4.15	4.15	2.96	4.28	4.11	82.5141	0.00113729	0.188801	0.994042	0.997947	prtfdc1b	30765		phosphoribosyl transferase domain containing 1b [Source:ZFIN	Acc:ZDB-GENE-980526-324]	prtfdc1b	2	() ): :
ENSDARG00000101543	23.07	19.73	21.61	18.42	22.2	23.1	682.361	-0.000670066	0.12668	0.994069	0.997947	washc5	393152		WASH complex subunit 5 [Source:ZFIN	Acc:ZDB-GENE-040426-838]	washc5	16	() ): :
ENSDARG00000055250	0.54	0.44	0.58	0.51	0.6	0.39	7.17853	-0.00032361	0.23503	0.993894	0.997864	ccnp	561391		cyclin P [Source:ZFIN	Acc:ZDB-GENE-030131-5453]	ccnp	18	() ): :
ENSDARG00000055463	1.71	2.16	1.52	1.61	1.69	2.06	43.9836	-0.00060706	0.204794	0.993804	0.997864	lrit3a	558559		info leucine-rich repeat, immunoglobulin-like and transmembrane domains 3a [Source:ZFIN	Acc:ZDB-GENE-080723-63]	lrit3a	14	() ): :
ENSDARG00000101497	13.34	6.85	12.03	13.53	11.87	5.62	4.58492	0.000545559	0.238547	0.99386	0.997864						4	() ): :
ENSDARG00000008372	13.51	11.45	12.55	12.82	10.36	14.15	371.51	-0.000707456	0.137783	0.993693	0.997801	spred2b	793290		sprouty related EVH1 domain containing 2b [Source:NCBI gene (formerly Entrezgene)	Acc:793290]	spred2b	13	() ): :
ENSDARG00000077577	6.78	8.45	7.01	7.45	7.56	6.86	81.4987	0.00121025	0.186009	0.993591	0.997778	ntsr1	569344		neurotensin receptor 1 [Source:HGNC Symbol	Acc:HGNC:8039]	NTSR1	23	() ): :,GO:0016020(cellular_component) ): :membrane,GO:0005886(cellular_component) ): :plasma membrane,GO:0004930(molecular_function) ): :G protein-coupled receptor activity,GO:0007165(biological_process) ): :signal transduction,GO:0007186(biological_process) ): :G protein-coupled receptor signaling pathway,GO:0007218(biological_process) ): :neuropeptide signaling pathway,GO:0016492(molecular_fun…
ENSDARG00000102069	1.45	1.11	0.89	0.06	1.32	2.07	7.36906	0.000599615	0.238687	0.993623	0.997778						25	() ): :
ENSDARG00000012057	0.71	0.97	1.46	0.88	0.57	1.73	9.61516	0.000743164	0.233849	0.993515	0.997762	mtnr1al	30660		melatonin receptor type 1A like [Source:ZFIN	Acc:ZDB-GENE-990415-154]	mtnr1al	14	() ): :
ENSDARG00000003909	0.3	0.27	0.32	0.31	0.19	0.4	5.5065	-0.000370132	0.237076	0.993399	0.997737	ftr01	565787				2	GO:0005737(cellular_component) ): :cytoplasm,GO:0046872(molecular_function) ): :metal ion binding,GO:0008270(molecular_function) ): :zinc ion binding,GO:0002376(biological_process) ): :immune system process
ENSDARG00000077103	0.6	0.97	1.19	0.63	1.19	0.86	16.8387	0.000908404	0.22708	0.993444	0.997737	LOC798168	798168				16	() ): :
ENSDARG00000094846	6.1	7.47	6.84	9.04	3.85	7.64	26.2767	-0.000559435	0.220116	0.993284	0.997669	si:ch211-14a11.5	103909363	XR_659242			20	() ): :
ENSDARG00000010279	12.1	12.39	13.79	12.29	11.1	14.61	194.934	0.00120167	0.15054	0.993214	0.99765	scamp2	406687		secretory carrier membrane protein 2 [Source:ZFIN	Acc:ZDB-GENE-040426-2702]	scamp2	25	() ): :
ENSDARG00000014907	8.62	7.01	6.88	6.4	8.3	7.45	281.967	0.000729257	0.156529	0.993219	0.99765	htra1b	565082		HtrA serine peptidase 1b [Source:ZFIN	Acc:ZDB-GENE-080219-7]	htra1b	12	() ): :
ENSDARG00000099438	0.55	0.28	0.58	0.47	0.36	0.58	14.9641	0.000944286	0.227815	0.993062	0.99765						19	() ): :
ENSDARG00000100234	0.44	0.62	1.99	1.3	0.36	1.32	40.4518	0.00102275	0.228476	0.992996	0.99765						23	() ): :
ENSDARG00000101281	4.62	5.48	5.11	3.61	5.36	6.07	113.094	0.00129076	0.181727	0.993083	0.99765	corin	100320926		corin, serine peptidase [Source:HGNC Symbol	Acc:HGNC:19012]	CORIN	23	() ): :
ENSDARG00000104005	14.31	16.82	16.29	16.56	12.95	17.58	514.758	0.0011136	0.134234	0.993145	0.99765	slc4a3	100333073		solute carrier family 4 member 3 [Source:NCBI gene (formerly Entrezgene)	Acc:100333073]	slc4a3	9	() ): :
ENSDARG00000011648	29.79	32.18	36.89	35.25	32.57	29.2	175.041	0.00130672	0.161861	0.992799	0.997649	snrpd1	192331		small nuclear ribonucleoprotein D1 polypeptide [Source:ZFIN	Acc:ZDB-GENE-020419-14]	snrpd1	19	() ): :
ENSDARG00000014169	127.54	122.25	110.2	81.92	141.96	131.75	692.049	0.00143317	0.160897	0.99294	0.997649				synaptotagmin 2 [Source:HGNC Symbol	Acc:HGNC:11510]	SYT2	6	() ): :
ENSDARG00000015312	4.11	6.17	5.5	6.07	4.34	5.26	136.423	-0.000839082	0.17871	0.992891	0.997649	klf12a	798629		Kruppel like factor 12a [Source:ZFIN	Acc:ZDB-GENE-030131-9188]	klf12a	1	() ): :
ENSDARG00000035607	12.25	10.12	12.99	12.03	12.23	10.56	353.062	-0.000783124	0.146024	0.992941	0.997649	ankle2	559297		ankyrin repeat and LEM domain containing 2 [Source:ZFIN	Acc:ZDB-GENE-030131-6090]	ankle2	5	() ): :
ENSDARG00000056089	24.78	27.03	27.58	29.38	23.56	25.57	983.348	-0.000971564	0.123081	0.992813	0.997649	nrbp1	569806		nuclear receptor binding protein 1 [Source:ZFIN	Acc:ZDB-GENE-041001-146]	nrbp1	20	() ): :
ENSDARG00000028663	5.2	3.28	4.75	4.58	4	4.53	150.003	-0.000936399	0.172387	0.992181	0.997228	tek	30747		TEK tyrosine kinase, endothelial [Source:ZFIN	Acc:ZDB-GENE-990415-56]	tek	5	() ): :
ENSDARG00000034293	69.07	65.85	61.29	63.34	66.56	63.7	2121.3	0.000514964	0.114201	0.992194	0.997228	hif1ab	393202		hypoxia inducible factor 1 subunit alpha b [Source:ZFIN	Acc:ZDB-GENE-040426-706]	hif1ab	20	() ): :
ENSDARG00000044627	1.58	1.57	1.58	1.22	1.49	2.01	26.9361	-0.000760318	0.215544	0.99228	0.997228	alg8	327601		ALG8 alpha-1,3-glucosyltransferase [Source:ZFIN	Acc:ZDB-GENE-030131-5812]	alg8	21	() ): :
ENSDARG00000062872	4.39	4.17	3.64	3.15	3.84	5.18	72.3312	0.000813457	0.191996	0.992206	0.997228	mrs2	565251		magnesium transporter MRS2 [Source:HGNC Symbol	Acc:HGNC:13785]	MRS2	16	GO:0045016(biological_process) ): :mitochondrial magnesium ion transmembrane transport,GO:0016020(cellular_component) ): :membrane,GO:0006811(biological_process) ): :monoatomic ion transport,GO:0005743(cellular_component) ): :mitochondrial inner membrane,GO:0015095(molecular_function) ): :magnesium ion transmembrane transporter activity,() ): :
ENSDARG00000097537	24.32	25.62	24.06	17.62	22.79	33.77	596.356	-0.000902606	0.1578	0.992281	0.997228	LOC103909792	103909792		WW domain containing E3 ubiquitin protein ligase 1 [Source:HGNC Symbol	Acc:HGNC:17004]	WWP1	24	() ): :
ENSDARG00000103612	3.79	2.91	2.83	2.82	3.35	3.25	49.3535	-0.00086893	0.201155	0.992291	0.997228	akt2l	403146		v-akt murine thymoma viral oncogene homolog 2, like [Source:ZFIN	Acc:ZDB-GENE-040121-5]	akt2l	10	() ): :
ENSDARG00000041502	1.31	1.16	1.41	1.54	1.01	1.3	57.4184	0.00147965	0.196977	0.991913	0.997126	tgfb1a	359834		transforming growth factor, beta 1a [Source:ZFIN	Acc:ZDB-GENE-030618-1]	tgfb1a	15	() ): :
ENSDARG00000028541	7.43	9.37	7.45	9.27	7.23	7.33	38.2663	0.00141769	0.208377	0.991522	0.996804	si:ch211-121a2.4	569653				20	() ): :,GO:0016020(cellular_component) ): :membrane
ENSDARG00000098235	7.34	5.31	6.09	6	6.56	5.91	116.8	-0.00106253	0.176188	0.991546	0.996804	actr5	406809		actin related protein 5 [Source:ZFIN	Acc:ZDB-GENE-040426-2877]	actr5	9	() ): :
ENSDARG00000004724	4.59	6.49	8.28	5.54	8.13	5.19	66.2631	-0.00312141	0.203883	0.991198	0.996786	tcea3	402983		transcription elongation factor A (SII), 3 [Source:ZFIN	Acc:ZDB-GENE-040426-1860]	tcea3	16	() ): :
ENSDARG00000006316	526.88	437.17	409.04	436.8	463.17	459.29	1516.65	-0.000236717	0.126908	0.991414	0.996786	rpl23a	335539		ribosomal protein L23a [Source:ZFIN	Acc:ZDB-GENE-030131-7479]	rpl23a	21	() ): :,GO:0003723(molecular_function) ): :RNA binding,GO:0031016(biological_process) ): :pancreas development,GO:0003735(molecular_function) ): :structural constituent of ribosome,GO:0006412(biological_process) ): :translation,GO:0005840(cellular_component) ): :ribosome,GO:0051726(biological_process) ): :regulation of cell cycle,GO:1990904(cellular_component) ): :ribonucleoprotein complex,GO:001…
ENSDARG00000010478	0.08	2.11	0.14	0.76	0.5	1.16	19.0995	-0.000354653	0.237791	0.991175	0.996786	hsp90aa1.1	30591		heat shock protein 90, alpha (cytosolic), class A member 1, tandem duplicate 1 [Source:ZFIN	Acc:ZDB-GENE-990415-94]	hsp90aa1.1	20	() ): :
ENSDARG00000014139	13.21	12.02	13.36	12.07	12.84	13.24	292.238	-0.00180863	0.135985	0.991284	0.996786	srp72	327335		signal recognition particle 72 [Source:HGNC Symbol	Acc:HGNC:11303]	SRP72	14	() ): :
ENSDARG00000024030	0.63	0.74	0.58	0.96	0.5	0.46	22.8131	0.00128908	0.223048	0.990843	0.996786	angptl2a	569092		angiopoietin-like 2a [Source:ZFIN	Acc:ZDB-GENE-080721-15]	angptl2a	5	() ): :
ENSDARG00000026835	7.04	4.57	6.07	5.24	4.77	7.71	54.1415	-0.0010978	0.201559	0.990652	0.996786	slc25a32b	503758		solute carrier family 25 member 32b [Source:ZFIN	Acc:ZDB-GENE-050306-39]	slc25a32b	16	() ): :
ENSDARG00000029905	3.41	3.82	4.23	4.33	3.41	3.6	38.9978	-0.00101054	0.206279	0.990981	0.996786	phyhd1	492804		phytanoyl-CoA dioxygenase domain containing 1 [Source:ZFIN	Acc:ZDB-GENE-041114-159]	phyhd1	21	() ): :
ENSDARG00000036818	1.91	1.77	2.03	2.38	1.38	1.94	27.8221	-0.000867709	0.215892	0.991337	0.996786	hyal3	100004557		hyaluronidase 3 [Source:ZFIN	Acc:ZDB-GENE-081104-366]	hyal3	8	() ): :
ENSDARG00000042470	0.82	0.78	0.83	0.46	0.86	1.09	8.20276	0.00100461	0.234125	0.990699	0.996786	s1pr3a	798390		sphingosine-1-phosphate receptor 3a [Source:ZFIN	Acc:ZDB-GENE-050208-347]	s1pr3a	22	() ): :
ENSDARG00000059699	15.92	14.9	16.63	16.79	15.17	14.86	355.338	-0.000884422	0.135673	0.991142	0.996786	dnajc16	559762		DnaJ heat shock protein family (Hsp40) member C16 [Source:HGNC Symbol	Acc:HGNC:29157]	DNAJC16	23	() ): :
ENSDARG00000059774	4	4	3.31	1.56	3.55	6.25	39.1056	0.00133323	0.2195	0.991303	0.996786	dub	566846		duboraya [Source:ZFIN	Acc:ZDB-GENE-060825-81]	dub	21	() ): :
ENSDARG00000062817	0.22	0.87	1.23	0.64	0.5	1.16	7.72259	0.000859665	0.236747	0.991073	0.996786	crym	791205		crystallin, mu [Source:ZFIN	Acc:ZDB-GENE-070112-1782]	crym	12	() ): :
ENSDARG00000074346	9.36	6.7	6.82	6.08	7.66	8.96	133.274	-0.00110219	0.178244	0.990777	0.996786	l3mbtl1b	559572				16	GO:0006355(biological_process) ): :regulation of DNA-templated transcription,GO:0005634(cellular_component) ): :nucleus,GO:0003682(molecular_function) ): :chromatin binding,GO:0042393(molecular_function) ): :histone binding,GO:0046872(molecular_function) ): :metal ion binding,GO:0008270(molecular_function) ): :zinc ion binding,GO:0045892(biological_process) ): :negative regulation of DNA-template…
ENSDARG00000076730	31.67	19.82	29.4	20.12	25.96	34.44	399.592	-0.001171	0.16708	0.990716	0.996786	syt6a	100149310		synaptotagmin 6 [Source:HGNC Symbol	Acc:HGNC:18638]	SYT6	23	GO:0016020(cellular_component) ): :membrane,GO:0005886(cellular_component) ): :plasma membrane,GO:0005509(molecular_function) ): :calcium ion binding,GO:0005544(molecular_function) ): :calcium-dependent phospholipid binding,GO:0071277(biological_process) ): :cellular response to calcium ion,GO:0019905(molecular_function) ): :syntaxin binding,GO:0070382(cellular_component) ): :exocytic vesicle,GO:…
ENSDARG00000079017	5.73	6.85	7.25	6.28	5.81	7.64	175.414	-0.00118413	0.15832	0.991063	0.996786	tlnrd1	100003148		talin rod domain containing 1 [Source:HGNC Symbol	Acc:HGNC:13519]	TLNRD1	7	() ): :
ENSDARG00000079286	38.27	39.37	38.3	32.95	35.3	47.35	1991.83	-0.00105878	0.119455	0.990907	0.996786	bcr	568320		BCR activator of RhoGEF and GTPase [Source:HGNC Symbol	Acc:HGNC:1014]	BCR	21	GO:0007165(biological_process) ): :signal transduction,GO:0004674(molecular_function) ): :protein serine/threonine kinase activity,GO:0005096(molecular_function) ): :GTPase activator activity,GO:0016020(cellular_component) ): :membrane,GO:0035556(biological_process) ): :intracellular signal transduction,GO:0005085(molecular_function) ): :guanyl-nucleotide exchange factor activity,GO:0042995(cellu…
ENSDARG00000089071	11.26	4.54	1.92	9.34	2.67	5.5	76.402	0.00125039	0.226819	0.99136	0.996786	ushbp1	100148935				11	() ): :
ENSDARG00000096120	3.35	3.89	3.36	4.75	2.23	3.7	100.676	-0.00106284	0.194705	0.990926	0.996786	si:ch73-266f23.3	100333922		si:ch73-266f23.3 [Source:ZFIN	Acc:ZDB-GENE-110914-182]	si:ch73-266f23.3	4	GO:0000977(molecular_function) ): :RNA polymerase II transcription regulatory region sequence-specific DNA binding,GO:0005634(cellular_component) ): :nucleus,GO:0006357(biological_process) ): :regulation of transcription by RNA polymerase II,GO:0000981(molecular_function) ): :DNA-binding transcription factor activity, RNA polymerase II-specific,() ): :
ENSDARG00000100136	4.48	4.92	5.09	5.15	4.44	4.7	248.489	0.00138096	0.145297	0.991209	0.996786	dcp1a	360153		decapping mRNA 1A [Source:ZFIN	Acc:ZDB-GENE-030723-5]	dcp1a	8	() ): :
ENSDARG00000100548	11.78	13.1	11.68	10.6	12.54	13.04	95.8818	-0.00102693	0.178239	0.991436	0.996786	tefm	566236		transcription elongation factor, mitochondrial [Source:NCBI gene (formerly Entrezgene)	Acc:566236]	tefm	6	() ): :
ENSDARG00000062178	19.6	25.23	26.97	21.43	23.96	25.66	961.045	-0.00186191	0.131253	0.990493	0.996764	ripor1	566573		RHO family interacting cell polarization regulator 1 [Source:ZFIN	Acc:ZDB-GENE-050420-32]	ripor1	18	() ): :
ENSDARG00000003132	13.54	7.57	14.89	12.06	11.41	11.87	81.2236	0.00170119	0.194924	0.990253	0.996758	apip	447941		APAF1 interacting protein [Source:ZFIN	Acc:ZDB-GENE-040912-128]	apip	7	() ): :
ENSDARG00000007129	6.61	4.2	5.9	4.32	3.24	9.35	84.3638	0.00162997	0.207453	0.990328	0.996758	slc6a16a	555229				3	() ): :
ENSDARG00000056806	3.85	4.37	4.02	4.75	3.57	3.86	12.9786	-0.000773545	0.22832	0.99044	0.996758						1	() ): :
ENSDARG00000093563	4.23	3.96	4.82	3.24	4.53	5.08	131.786	0.00169568	0.173619	0.990414	0.996758	si:ch211-225b11.4	561626				5	() ): :,GO:0030488(biological_process) ): :tRNA methylation
ENSDARG00000093665	0.99	1.02	1.86	2.04	0.78	0.91	16.691	0.00119667	0.229157	0.990361	0.996758						4	() ): :
ENSDARG00000098862	28.97	17.88	17.22	15.73	17.61	30.74	64.3917	0.00164528	0.20584	0.990155	0.996758	plpp4	100334794		phospholipid phosphatase 4 [Source:HGNC Symbol	Acc:HGNC:23531]	PLPP4	13	() ): :
ENSDARG00000102606	6.46	7.42	8.05	5.53	7.56	8.57	131.897	0.00169029	0.173661	0.99029	0.996758	znf1158	108181161				22	() ): :
ENSDARG00000115832	6.12	3.1	3.32	5.74	2.95	3.83	16.1063	-0.000789126	0.22829	0.990123	0.996758	rab31	568800				2	() ): :
ENSDARG00000115987	14.21	9.73	12.64	12.58	11.73	11.66	80.54	0.00170506	0.186807	0.990317	0.996758	srp14	619260		signal recognition particle 14 [Source:ZFIN	Acc:ZDB-GENE-050913-131]	srp14	17	() ): :
ENSDARG00000002509	0.12	0.45	0.33	0.3	0.4	0.16	4.58866	0.000783062	0.238998	0.989855	0.99673	zgc:153911	768172		zgc:153911 [Source:ZFIN	Acc:ZDB-GENE-061013-174]	zgc:153911	13	GO:0016020(cellular_component) ): :membrane,GO:0005886(cellular_component) ): :plasma membrane,GO:0009897(cellular_component) ): :external side of plasma membrane,GO:0007166(biological_process) ): :cell surface receptor signaling pathway,GO:0006955(biological_process) ): :immune response,GO:0071222(biological_process) ): :cellular response to lipopolysaccharide,GO:0031295(biological_process) ): :…
ENSDARG00000003732	0.17	0.61	0.28	0.31	0.2	0.49	4.07651	0.000744698	0.239545	0.989998	0.99673	mitfa	30080		melanocyte inducing transcription factor a [Source:ZFIN	Acc:ZDB-GENE-990910-11]	mitfa	6	() ): :
ENSDARG00000014348	12.37	7.67	9.69	5.91	12.49	10.85	142.684	-0.00104892	0.194458	0.989732	0.99673	stk17b	393507		serine/threonine kinase 17b (apoptosis-inducing) [Source:ZFIN	Acc:ZDB-GENE-040426-1499]	stk17b	9	() ): :
ENSDARG00000029204	2.78	2.37	2.01	2.19	1.95	3.07	43.22	-0.00114495	0.206068	0.989972	0.99673	tyrp1a	100333145		tyrosinase related protein 1 [Source:HGNC Symbol	Acc:HGNC:12450]	TYRP1	7	GO:0030318(biological_process) ): :melanocyte differentiation,GO:0016020(cellular_component) ): :membrane,GO:0046872(molecular_function) ): :metal ion binding,GO:0043473(biological_process) ): :pigmentation,GO:0016491(molecular_function) ): :oxidoreductase activity,GO:0031410(cellular_component) ): :cytoplasmic vesicle,GO:0003406(biological_process) ): :retinal pigment epithelium development,GO:0…
ENSDARG00000043858	8.36	9.41	9.52	7.52	8.37	11.34	116.245	-0.00144252	0.173948	0.989698	0.99673	cdk19	100149670		cyclin dependent kinase 19 [Source:HGNC Symbol	Acc:HGNC:19338]	CDK19	20	() ): :,GO:0005829(cellular_component) ): :cytosol,GO:0004672(molecular_function) ): :protein kinase activity,GO:0004674(molecular_function) ): :protein serine/threonine kinase activity,GO:0005524(molecular_function) ): :ATP binding,GO:0005634(cellular_component) ): :nucleus,GO:0000166(molecular_function) ): :nucleotide binding,GO:0016301(molecular_function) ): :kinase activity,GO:0016310(biologi…
ENSDARG00000044625	63.34	61.19	71.99	62.59	63.95	67.65	2262.8	-0.00110419	0.0982778	0.98993	0.99673	pcf11	492341		PCF11 cleavage and polyadenylation factor subunit [Source:ZFIN	Acc:ZDB-GENE-041114-175]	pcf11	21	() ): :
ENSDARG00000056832	0.38	0	0.24	0.05	0.41	0.21	4.50386	-0.000365009	0.241194	0.989964	0.99673	exo1	406778		exonuclease 1 [Source:ZFIN	Acc:ZDB-GENE-040426-2828]	exo1	17	() ): :
ENSDARG00000063572	8.72	10.84	9.01	16.97	6.26	4.85	307.883	-0.00100743	0.207343	0.98971	0.99673	perp	494479		p53 apoptosis effector related to pmp22 [Source:ZFIN	Acc:ZDB-GENE-050104-1]	perp	13	() ): :
ENSDARG00000069926	1.68	2.01	1.1	1.51	1.65	1.6	22.2048	-0.000997125	0.221614	0.989883	0.99673	hsd3b1	553532		hydroxy-delta-5-steroid dehydrogenase, 3 beta- and steroid delta-isomerase 1 [Source:NCBI gene (formerly Entrezgene)	Acc:553532]		9	GO:0043473(biological_process) ): :pigmentation,GO:0016491(molecular_function) ): :oxidoreductase activity,GO:0008202(biological_process) ): :steroid metabolic process,GO:0003854(molecular_function) ): :3-beta-hydroxy-delta5-steroid dehydrogenase activity,GO:0016616(molecular_function) ): :oxidoreductase activity, acting on the CH-OH group of donors, NAD or NADP as acceptor,GO:0006694(biological_…
ENSDARG00000099695	0.3	0.58	0.3	0.23	0.23	0.8	14.4458	-0.000681906	0.232477	0.989959	0.99673						3	() ): :
ENSDARG00000100232	7.23	6.16	5.56	4.59	5.86	8.56	75.8034	-0.0012738	0.194768	0.989636	0.99673	glis2b	102725539		GLIS family zinc finger 2b [Source:ZFIN	Acc:ZDB-GENE-091204-120]	glis2b	3	() ): :
ENSDARG00000105584	5.39	4.61	5.08	5.1	4.56	5.35	40.9946	-0.00118542	0.203492	0.989912	0.99673	slc8b1	560601				7	() ): :
ENSDARG00000117300	0.16	0.23	0.19	0.29	0.05	0.24	6.83159	-0.000565557	0.237119	0.989963	0.99673						18	() ): :
ENSDARG00000086420	2.09	5.75	1.26	0.7	2.94	5.63	88.1854	0.00117794	0.237085	0.989304	0.996636						12	() ): :
ENSDARG00000096375	14.28	14.8	14.13	14.97	11.4	16.77	594.656	-0.00131963	0.133431	0.9893	0.996636						6	() ): :
ENSDARG00000039356	1.76	1.41	2.17	2.67	1.5	1.01	47.4952	0.00166402	0.215147	0.989211	0.996635	zgc:194209	570908		zgc:194209 [Source:ZFIN	Acc:ZDB-GENE-081022-75]	zgc:194209	4	GO:0009058(biological_process) ): :biosynthetic process,GO:0016844(molecular_function) ): :strictosidine synthase activity,GO:0016787(molecular_function) ): :hydrolase activity
ENSDARG00000009505	30.9	30.07	39.26	38.22	27.8	33.12	496.845	-0.00138314	0.143344	0.989131	0.996634	prelid3b	378855		PRELI domain containing 3 [Source:ZFIN	Acc:ZDB-GENE-031002-13]	prelid3b	6	() ): :
ENSDARG00000025071	27.26	26.41	28.52	23.36	25.64	32.74	506.369	-0.00136424	0.129466	0.98911	0.996634	brd8b	337414		bromodomain containing 8b [Source:ZFIN	Acc:ZDB-GENE-030722-10]	brd8b	14	() ): :
ENSDARG00000042946	14.87	11.15	23.1	18.29	13.75	16.3	602.161	-0.00138912	0.169993	0.989164	0.996634	hook1	570393		hook microtubule-tethering protein 1 [Source:ZFIN	Acc:ZDB-GENE-041001-159]	hook1	20	() ): :
ENSDARG00000055973	0.7	0.44	0.59	0.56	0.49	0.69	7.2739	0.0010876	0.23475	0.988982	0.996591	zar1l	561189		zygote arrest 1-like [Source:ZFIN	Acc:ZDB-GENE-060810-119]	zar1l	10	() ): :
ENSDARG00000077631	1.14	1	1.03	1.88	0.35	0.99	5.2771	-0.000596452	0.238307	0.988983	0.996591						22	() ): :
ENSDARG00000095293	0.11	0.36	0.06	0.23	0.11	0.18	6.04312	0.000890639	0.238654	0.9889	0.996591						4	() ): :
ENSDARG00000017615	4.91	2.13	5.28	2.74	5.26	3.98	92.8423	0.00185072	0.207727	0.988787	0.996554	tlx3b	266965		T cell leukemia homeobox 3b [Source:ZFIN	Acc:ZDB-GENE-021021-1]	tlx3b	10	() ): :
ENSDARG00000018111	24.32	21.52	27.96	25.19	23.72	23.87	650.158	-0.00137129	0.125722	0.98879	0.996554	kdm7aa	321248		lysine (K)-specific demethylase 7Aa [Source:ZFIN	Acc:ZDB-GENE-030131-9829]	kdm7aa	4	() ): :
ENSDARG00000043727	13.67	14.19	14.95	16.8	11.46	14.08	248.659	0.00194833	0.15544	0.988495	0.996554	cwc27	394078		CWC27 spliceosome associated cyclophilin [Source:ZFIN	Acc:ZDB-GENE-040426-1118]	cwc27	10	() ): :
ENSDARG00000070512	34.6	35.99	44.72	42.92	37.22	32.81	580.338	0.00298698	0.145136	0.988627	0.996554	cnpy3	550136		canopy FGF signaling regulator 3 [Source:NCBI gene (formerly Entrezgene)	Acc:550136]	cnpy3	1	() ): :
ENSDARG00000079456	0.32	0.78	0.46	0.83	0.28	0.4	28.883	0.00148442	0.22568	0.988795	0.996554	si:ch211-149a19.3	568118				19	() ): :
ENSDARG00000092722	21.87	19.11	19.61	18.36	19.31	22.47	464.791	-0.00147554	0.127898	0.988674	0.996554	unc5da	566274		unc-5 netrin receptor Da [Source:ZFIN	Acc:ZDB-GENE-080908-2]	unc5da	21	() ): :
ENSDARG00000094736	1.13	1.31	2.24	0	1.67	3.05	26.5073	-0.000647717	0.234937	0.988628	0.996554	znf1157	100038791		zinc finger protein 1157 [Source:ZFIN	Acc:ZDB-GENE-070424-89]	znf1157	22	() ): :,GO:0000977(molecular_function) ): :RNA polymerase II transcription regulatory region sequence-specific DNA binding,GO:0005634(cellular_component) ): :nucleus,GO:0006357(biological_process) ): :regulation of transcription by RNA polymerase II,GO:0000981(molecular_function) ): :DNA-binding transcription factor activity, RNA polymerase II-specific
ENSDARG00000100072	37.12	35.02	41.62	38.5	33.09	40.99	709.97	0.00157529	0.116281	0.988808	0.996554	mgrn1a	793939		mahogunin, ring finger 1a [Source:ZFIN	Acc:ZDB-GENE-030131-6192]	mgrn1a	12	() ): :
ENSDARG00000117145	1.34	0.35	0.63	0.29	0.74	1.28	15.42	0.00123999	0.232976	0.988614	0.996554	notum1b	436917		notum, palmitoleoyl-protein carboxylesterase b [Source:ZFIN	Acc:ZDB-GENE-040718-391]	notum1b	11	() ): :
ENSDARG00000104713	2.8	3.94	2.34	3.48	3.36	2.06	25.2907	-0.00113009	0.2213	0.988367	0.996527	zgc:165653	100006671		zgc:165653 [Source:ZFIN	Acc:ZDB-GENE-070620-24]	zgc:165653	12	GO:0003779(molecular_function) ): :actin binding,GO:0005575(cellular_component) ): :cellular_component
ENSDARG00000044813	7.86	7.55	9.83	8.68	8.08	8.15	194.46	-0.00155222	0.155246	0.988262	0.996468	vps33b	541534		VPS33B late endosome and lysosome associated [Source:ZFIN	Acc:ZDB-GENE-050327-73]	vps33b	7	() ): :
ENSDARG00000035578	6.14	7.03	9.88	9.02	6.29	7.38	150.171	0.00208812	0.178677	0.988192	0.996444	hs3st1l2	562344		heparan sulfate (glucosamine) 3-O-sulfotransferase 1-like 2 [Source:ZFIN	Acc:ZDB-GENE-070202-3]	hs3st1l2	5	() ): :
ENSDARG00000058601	36.4	38.56	44.25	32.49	44.85	40.14	531.327	-0.000945415	0.143271	0.988079	0.996415	gdap1	553702		ganglioside induced differentiation associated protein 1 [Source:ZFIN	Acc:ZDB-GENE-050522-424]	gdap1	24	() ): :
ENSDARG00000060734	26.35	26.71	31.1	29.81	24.51	29.06	670.773	-0.00184238	0.121564	0.988117	0.996415				adaptor protein, phosphotyrosine interaction, PH domain and leucine zipper containing 1 [Source:ZFIN	Acc:ZDB-GENE-081016-1]	appl1	11	() ): :
ENSDARG00000069289	9.43	9.1	10.31	7.5	10.89	9.99	167.167	0.00207343	0.166824	0.987914	0.996303	gabpa	58110		GA binding protein transcription factor subunit alpha [Source:ZFIN	Acc:ZDB-GENE-011010-2]	gabpa	9	() ): :
ENSDARG00000093331	1.16	0.47	0.43	0.72	0.84	0.37	5.79752	0.00100318	0.237829	0.987909	0.996303						16	() ): :
ENSDARG00000021022	10.58	10.15	13.46	9.61	9.52	15.07	154.852	-0.00161638	0.172194	0.987735	0.996283	ift57	414929		intraflagellar transport 57 homolog (Chlamydomonas) [Source:ZFIN	Acc:ZDB-GENE-040614-1]	ift57	2	() ): :
ENSDARG00000058548	0.58	0.91	0.6	0.52	0.91	0.6	13.7842	0.00143525	0.229245	0.987802	0.996283	bves	415107		blood vessel epicardial substance [Source:ZFIN	Acc:ZDB-GENE-040624-11]	bves	16	() ): :,GO:0016020(cellular_component) ): :membrane,GO:0005886(cellular_component) ): :plasma membrane,GO:0007155(biological_process) ): :cell adhesion,GO:0005923(cellular_component) ): :bicellular tight junction,GO:0016328(cellular_component) ): :lateral plasma membrane,GO:0070161(cellular_component) ): :anchoring junction
ENSDARG00000100851	25.28	30.52	27.08	29.1	23.04	30.41	668.891	-0.00151864	0.132506	0.987772	0.996283	gphnb	100007749		gephyrin b [Source:ZFIN	Acc:ZDB-GENE-070705-4]	gphnb	20	() ): :
ENSDARG00000113484	0.44	1.39	0	0.28	0.1	1.67	5.01463	0.0007886	0.241302	0.987721	0.996283						11	() ): :
ENSDARG00000054447	0.43	0.32	0.85	0.65	0.16	0.79	18.2208	0.00140518	0.231426	0.987565	0.99623	slc29a1b	100331439		solute carrier family 29 member 1 (Augustine blood group) [Source:HGNC Symbol	Acc:HGNC:11003]	SLC29A1	11	GO:0016020(cellular_component) ): :membrane,GO:0005886(cellular_component) ): :plasma membrane,GO:0005337(molecular_function) ): :nucleoside transmembrane transporter activity,GO:0015862(biological_process) ): :uridine transport,GO:1901642(biological_process) ): :nucleoside transmembrane transport,GO:0016323(cellular_component) ): :basolateral plasma membrane,GO:0016328(cellular_component) ): :la…
ENSDARG00000062579	2.71	3.4	3.25	2.95	2.02	4.48	54.53	0.00202122	0.204971	0.987487	0.996198	kremen1	100141352		kringle containing transmembrane protein 1 [Source:ZFIN	Acc:ZDB-GENE-070705-262]	kremen1	5	() ): :
ENSDARG00000038608	25.92	28.7	26.94	27.62	29.69	22.4	152.793	0.00225291	0.170971	0.987345	0.996101	sdhc	445129		succinate dehydrogenase complex, subunit C, integral membrane protein [Source:ZFIN	Acc:ZDB-GENE-040801-26]	sdhc	2	() ): :
ENSDARG00000104047	2.45	3.17	3.03	2.74	2.17	3.71	113.674	0.00220767	0.181151	0.987167	0.995968	misp	567688				11	() ): :
ENSDARG00000102783	3.39	2.71	4.4	3.92	2.62	3.99	26.9215	-0.0013845	0.216967	0.987047	0.995893	slc25a35	557185		solute carrier family 25 member 35 [Source:NCBI gene (formerly Entrezgene)	Acc:557185]	slc25a35	5	() ): :
ENSDARG00000010925	0.34	0.55	0.39	0.43	0.57	0.23	4.59428	0.00100779	0.23852	0.98696	0.995852	htra3b	573378		HtrA serine peptidase 3 [Source:HGNC Symbol	Acc:HGNC:30406]	HTRA3	7	() ): :
ENSDARG00000098712	4.25	4.57	5.45	3.94	3.77	6.71	44.4348	-0.00158289	0.206118	0.986778	0.995751						5	() ): :
ENSDARG00000101423	0.47	0.56	0.24	0.69	0.43	0.11	7.70367	0.00115176	0.237097	0.986727	0.995751	cyp2y3	368352		cytochrome P450, family 2, subfamily Y, polypeptide 3 [Source:ZFIN	Acc:ZDB-GENE-050522-490]	cyp2y3	15	() ): :
ENSDARG00000104453	1.84	1.15	1.75	1.33	1.52	1.87	75.6384	-0.00168458	0.192098	0.986813	0.995751	flt4	30121		fms related receptor tyrosine kinase 4 [Source:ZFIN	Acc:ZDB-GENE-980526-326]	flt4	14	() ): :
ENSDARG00000005392	3.98	2.4	4.22	2.43	2.48	5.83	65.7239	-0.0015122	0.209956	0.986581	0.995709	slc5a5	561445		solute carrier family 5 member 5 [Source:ZFIN	Acc:ZDB-GENE-060503-585]	slc5a5	8	() ): :
ENSDARG00000014674	32.3	30.56	31.71	28.87	32.63	32	1625.04	-0.00188251	0.108431	0.986633	0.995709	acsl3b	559656		acyl-CoA synthetase long chain family member 3b [Source:ZFIN	Acc:ZDB-GENE-030131-492]	acsl3b	2	() ): :
ENSDARG00000045935	1.77	1.03	2.87	1.25	3.17	1.08	10.177	-0.000924144	0.234632	0.986598	0.995709	immp1l	795154		inner mitochondrial membrane peptidase subunit 1 [Source:ZFIN	Acc:ZDB-GENE-070522-4]	immp1l	7	() ): :,GO:0016787(molecular_function) ): :hydrolase activity,GO:0006508(biological_process) ): :proteolysis,GO:0016020(cellular_component) ): :membrane,GO:0004252(molecular_function) ): :serine-type endopeptidase activity,GO:0005739(cellular_component) ): :mitochondrion,GO:0005743(cellular_component) ): :mitochondrial inner membrane,GO:0008233(molecular_function) ): :peptidase activity,GO:000823…
ENSDARG00000070657	37.19	36.56	40.76	34.96	42.5	35.2	669.215	-0.00172078	0.134139	0.986562	0.995709	pa2g4b	323462		proliferation-associated 2G4, b [Source:ZFIN	Acc:ZDB-GENE-030131-2182]	pa2g4b	23	() ): :
ENSDARG00000074761	24.96	21.39	21.61	22.17	14.98	31.42	212.656	-0.00178697	0.17627	0.986592	0.995709	bicdl1	100537719		BICD family like cargo adaptor 1 [Source:HGNC Symbol	Acc:HGNC:28095]	BICDL1	8	() ): :
ENSDARG00000075608	0.86	3.15	2.8	4.05	1.17	1.42	47.9334	0.00175323	0.226628	0.986536	0.995709	mical2a	569607		microtubule associated monooxygenase, calponin and LIM domain containing 2 [Source:HGNC Symbol	Acc:HGNC:24693]	MICAL2	7	() ): :
ENSDARG00000086576	1.24	1.43	2.17	1.57	1.37	1.85	38.4806	0.00207671	0.209295	0.986575	0.995709						4	() ): :
ENSDARG00000088515	16.56	14.52	16.08	15.58	13.51	17.72	268.746	0.00203016	0.141388	0.986632	0.995709	st6gal2b	797439		ST6 beta-galactosamide alpha-2,6-sialyltranferase 2b [Source:ZFIN	Acc:ZDB-GENE-120426-2]	st6gal2b	6	() ): :
ENSDARG00000091253	0.83	1.59	0.78	0.27	1.87	0.91	16.6839	0.0014325	0.233125	0.986597	0.995709	smyd1b	569027		SET and MYND domain containing 1b [Source:ZFIN	Acc:ZDB-GENE-060522-1]	smyd1b	8	() ): :
ENSDARG00000092387	6.84	5.89	6.56	7.66	5.17	6.07	19.2885	0.00184136	0.222278	0.986161	0.995709	zgc:193742	558782		zgc:193742 [Source:ZFIN	Acc:ZDB-GENE-081022-37]	zgc:193742	10	() ): :
ENSDARG00000096837	1.7	3.62	2.63	3.35	1.88	2.63	24.7075	0.00181959	0.222227	0.986414	0.995709						15	() ): :
ENSDARG00000101479	3.83	1.44	5.44	6.75	3.55	0	12.1907	-0.000696712	0.238232	0.986483	0.995709	LOC103910140	103910140				2	() ): :
ENSDARG00000087693	8.79	16.22	20.44	13.57	16.33	14.23	45.1614	0.00212192	0.211713	0.986068	0.995696	atox1	558347		antioxidant 1 copper chaperone [Source:ZFIN	Acc:ZDB-GENE-120720-2]	atox1	14	GO:0006811(biological_process) ): :monoatomic ion transport,GO:0046872(molecular_function) ): :metal ion binding,GO:0005829(cellular_component) ): :cytosol,GO:0016531(molecular_function) ): :copper chaperone activity,GO:0006825(biological_process) ): :copper ion transport
ENSDARG00000007125	7.57	8.24	7.62	7.63	6.69	9.09	95.4254	-0.00212652	0.177202	0.984638	0.995587	asb6	553600		ankyrin repeat and SOCS box containing 6 [Source:ZFIN	Acc:ZDB-GENE-050522-338]	asb6	8	() ): :
ENSDARG00000015158	2.6	3.22	3.65	2.92	2.6	3.87	34.9041	0.00228606	0.209865	0.984945	0.995587	slc50a1	503533		solute carrier family 50 member 1 [Source:NCBI gene (formerly Entrezgene)	Acc:503533]	slc50a1	16	() ): :
ENSDARG00000016460	33.28	28.33	34.32	27.73	28.59	38.91	1219.07	0.00192177	0.123605	0.985267	0.995587	fut9a	796410		fucosyltransferase 9a [Source:ZFIN	Acc:ZDB-GENE-080723-75]	fut9a	17	() ): :
ENSDARG00000021135	9.84	6.68	5.43	9.13	8.06	4.1	77.537	0.00225167	0.209636	0.985628	0.995587	dhrs4	393539		dehydrogenase/reductase (SDR family) member 4 [Source:ZFIN	Acc:ZDB-GENE-040426-1498]	dhrs4	7	() ): :
ENSDARG00000022550	1.43	1.82	2.09	1.64	1.35	2.39	30.1903	-0.00157398	0.214797	0.985741	0.995587	gxylt1b	556315		glucoside xylosyltransferase 1b [Source:ZFIN	Acc:ZDB-GENE-041210-116]	gxylt1b	4	() ): :
ENSDARG00000024365	0.46	0.74	0.97	1.01	0.52	0.61	15.5056	-0.00134063	0.228507	0.984731	0.995587	crlf1a	436923		cytokine receptor-like factor 1a [Source:ZFIN	Acc:ZDB-GENE-040718-397]	crlf1a	2	() ): :
ENSDARG00000028485	3.48	1.2	2.48	2.22	2.21	2.6	23.452	0.00188496	0.223309	0.985747	0.995587	cabp5b	553766		calcium binding protein 5b [Source:ZFIN	Acc:ZDB-GENE-050522-146]	cabp5b	3	() ): :
ENSDARG00000031261	17.21	19.62	19.89	20.39	19.74	15.32	256.935	0.00239442	0.160113	0.985673	0.995587	sap30bp	321738		SAP30 binding protein [Source:ZFIN	Acc:ZDB-GENE-030131-457]	sap30bp	8	() ): :
ENSDARG00000035338	81.92	66.91	76.89	65.43	94.26	60.2	605.114	0.00255488	0.162666	0.98494	0.995587	tppp2	559490		tubulin polymerization-promoting protein family member 2 [Source:ZFIN	Acc:ZDB-GENE-140106-24]	tppp2	5	GO:0005737(cellular_component) ): :cytoplasm,GO:0015631(molecular_function) ): :tubulin binding,GO:0005874(cellular_component) ): :microtubule,GO:0046785(biological_process) ): :microtubule polymerization,GO:0048675(biological_process) ): :axon extension,GO:0001578(biological_process) ): :microtubule bundle formation,GO:0032273(biological_process) ): :positive regulation of protein polymerization
ENSDARG00000036232	14.66	13.64	13.61	11.48	11.12	19.56	533.51	-0.00189537	0.15585	0.985807	0.995587	trpm7	280653		transient receptor potential cation channel, subfamily M, member 7 [Source:ZFIN	Acc:ZDB-GENE-021115-2]	trpm7	18	() ): :
ENSDARG00000036684	24.84	21.31	27.5	20.67	34.2	15.89	65.4985	0.00235693	0.206717	0.985045	0.995587	ndufa7	445042		NADH:ubiquinone oxidoreductase subunit A7 [Source:ZFIN	Acc:ZDB-GENE-040801-169]	ndufa7	8	() ): :
ENSDARG00000037040	5.08	4.11	6.25	5.34	4.72	5.14	63.1087	0.00236209	0.193377	0.985858	0.995587	cgrrf1	692284		cell growth regulator with ring finger domain 1 [Source:ZFIN	Acc:ZDB-GENE-040724-100]	cgrrf1	20	() ): :
ENSDARG00000038067	31.22	29.87	30.13	24.72	31.93	33.84	1022.92	-0.00182257	0.126791	0.984749	0.995587	smurf2	563633		SMAD specific E3 ubiquitin protein ligase 2 [Source:NCBI gene (formerly Entrezgene)	Acc:563633]	smurf2	3	() ): :
ENSDARG00000039378	4.85	4.94	7	6.05	5.84	4.59	108.931	-0.00203142	0.184194	0.984994	0.995587	rcn2	571340		reticulocalbin 2 [Source:ZFIN	Acc:ZDB-GENE-050706-62]	rcn2	18	() ): :
ENSDARG00000042527	2.35	1.44	1.49	2.21	1.39	1.67	12.5992	-0.00123485	0.229882	0.985316	0.995587	unga	393949		uracil DNA glycosylase a [Source:ZFIN	Acc:ZDB-GENE-040426-900]	unga	5	() ): :
ENSDARG00000045611	14.41	13.49	15.42	14.52	15.07	12.81	160.5	0.00234885	0.16246	0.985914	0.995587	nfybb	503744		nuclear transcription factor Y, beta b [Source:ZFIN	Acc:ZDB-GENE-050306-25]	nfybb	25	() ): :
ENSDARG00000055360	9.47	11.49	12.42	13.24	10.12	9.35	78.5534	0.00252911	0.190686	0.984723	0.995587	llph	100003313		LLP homolog, long-term synaptic facilitation factor [Source:ZFIN	Acc:ZDB-GENE-051030-30]	llph	4	() ): :
ENSDARG00000058089	16.11	17.81	15.75	16.29	14.91	18.21	709.71	-0.000398393	0.121254	0.985052	0.995587	rprd2a	334701		regulation of nuclear pre-mRNA domain containing 2a [Source:ZFIN	Acc:ZDB-GENE-030131-6641]	rprd2a	19	() ): :
ENSDARG00000074848	4.55	4.88	7.93	6.54	5.45	5.11	68.3084	-0.00185758	0.198747	0.985604	0.995587	smim7	100093704		small integral membrane protein 7 [Source:NCBI gene (formerly Entrezgene)	Acc:100093704]	smim7	11	() ): :
ENSDARG00000077306	3.18	4.44	3.19	4.98	3.29	2.42	20.2312	-0.00136405	0.224521	0.985681	0.995587	cutc	450025		cutC copper transporter homolog (E. coli) [Source:ZFIN	Acc:ZDB-GENE-041010-144]	cutc	13	() ): :
ENSDARG00000079263	0.28	0.54	1.52	0.69	1.05	0.59	6.66704	0.00124703	0.237218	0.985265	0.995587	si:dkeyp-2e4.2	100149164		si:dkeyp-2e4.2 [Source:ZFIN	Acc:ZDB-GENE-030131-9307]	si:dkeyp-2e4.2	13	() ): :
ENSDARG00000079983	0.46	0.71	0.82	0.64	0.64	0.71	16.0098	-0.00134433	0.225933	0.985642	0.995587	agbl2	568152		AGBL carboxypeptidase 2 [Source:NCBI gene (formerly Entrezgene)	Acc:568152]	agbl2	25	() ): :
ENSDARG00000086405	3.31	4.34	5	4.13	3.9	4.53	105.171	-0.00199165	0.178737	0.985513	0.995587	mterf2	557469		mitochondrial transcription termination factor 2 [Source:ZFIN	Acc:ZDB-GENE-070424-91]	mterf2	18	() ): :
ENSDARG00000094151	1.49	2.03	2.5	1.58	2.18	2.23	8.82519	-0.00106471	0.233182	0.985886	0.995587						5	() ): :
ENSDARG00000099779	3.79	4	3.11	4.34	2.72	3.83	190.89	-0.00204349	0.172636	0.985085	0.995587	si:ch211-11n16.2	563140				15	GO:0003924(molecular_function) ): :GTPase activity,GO:0005525(molecular_function) ): :GTP binding,GO:0005575(cellular_component) ): :cellular_component,GO:0046872(molecular_function) ): :metal ion binding,GO:0008150(biological_process) ): :biological_process,GO:0003674(molecular_function) ): :molecular_function,GO:0005811(cellular_component) ): :lipid droplet,GO:0005545(molecular_function) ): :1-…
ENSDARG00000100028	0.83	0.63	0.86	0.15	0.89	1.25	6.00688	0.00119137	0.237857	0.9853	0.995587	pole2	192320		polymerase (DNA directed), epsilon 2 [Source:ZFIN	Acc:ZDB-GENE-020419-16]	pole2	13	() ): :
ENSDARG00000100625	4.96	3.71	5.57	3.63	5.72	4.72	20.3829	-0.00146361	0.222238	0.985495	0.995587	si:ch73-197b13.1	100535586		si:ch73-197b13.1 [Source:ZFIN	Acc:ZDB-GENE-081104-251]	si:ch73-197b13.1	22	() ): :
ENSDARG00000104547	1.74	2.32	1.45	2.35	0.82	2.48	11.9412	-0.00111006	0.231997	0.985697	0.995587						20	() ): :
ENSDARG00000104894	9.1	9.04	13.25	10.92	9.77	10.39	65.3165	-0.00210077	0.193209	0.985164	0.995587	si:ch73-138e16.2	100005958		si:ch73-138e16.2 [Source:ZFIN	Acc:ZDB-GENE-070705-201]	si:ch73-138e16.2	22	GO:0005634(cellular_component) ): :nucleus,GO:0000978(molecular_function) ): :RNA polymerase II cis-regulatory region sequence-specific DNA binding,GO:0003700(molecular_function) ): :DNA-binding transcription factor activity,GO:0006357(biological_process) ): :regulation of transcription by RNA polymerase II
ENSDARG00000110709	2.14	1.79	2.48	2.22	1.88	2.26	104.454	-0.00209416	0.175606	0.984874	0.995587	zdhhc21	100144560		zinc finger DHHC-type palmitoyltransferase 21 [Source:ZFIN	Acc:ZDB-GENE-080401-2]	zdhhc21	7	() ): :
ENSDARG00000033655	552.91	506.38	663.91	535.37	606.13	548.8	8837.63	0.00162546	0.117836	0.984136	0.995196	stmn1b	550548		stathmin 1b [Source:ZFIN	Acc:ZDB-GENE-050417-397]	stmn1b	16	() ): :
ENSDARG00000098569	2.2	2.37	2.15	2.22	2.41	1.89	16.8102	0.00200545	0.224456	0.984146	0.995196						4	() ): :
ENSDARG00000078076	9.99	13.41	17.52	13	11.54	16.17	295.521	-0.002542	0.165653	0.984026	0.995169	nab2	100005680		NGFI-A binding protein 2 (EGR1 binding protein 2) [Source:ZFIN	Acc:ZDB-GENE-080204-105]	nab2	11	() ): :
ENSDARG00000041306	14.81	13.29	14.35	17.96	9.91	14.34	895.588	-0.00216281	0.155425	0.983931	0.995119	mrps25	550252		mitochondrial ribosomal protein S25 [Source:ZFIN	Acc:ZDB-GENE-050417-52]	mrps25	8	() ): :
ENSDARG00000069527	10.73	9.55	11	10.42	11.36	8.75	154.551	0.00269385	0.168584	0.983898	0.995119	ube2g1b	100000479		ubiquitin-conjugating enzyme E2G 1b (UBC7 homolog, yeast) [Source:ZFIN	Acc:ZDB-GENE-040426-2939]	ube2g1b	21	() ): :
ENSDARG00000031126	1.26	1.3	0.91	0.7	1.27	1.49	24.8242	-0.00169034	0.220796	0.983786	0.995065	notum1a	570510		notum, palmitoleoyl-protein carboxylesterase a [Source:ZFIN	Acc:ZDB-GENE-120807-2]	notum1a	3	() ): :
ENSDARG00000043011	1.42	2.22	2.1	1.92	2.29	1.41	30.0081	-0.00180384	0.217032	0.983665	0.994989	chst14	404732		carbohydrate (N-acetylgalactosamine 4-0) sulfotransferase 14 [Source:NCBI gene (formerly Entrezgene)	Acc:404732]	chst14	20	() ): :
ENSDARG00000074546	39.05	48.1	51.89	0.6	93.03	44.55	1339.1	-0.00124151	0.241028	0.983556	0.994925	si:ch211-213a13.9	569389				22	() ): :
ENSDARG00000015879	0.71	0.84	0.43	0.39	0.89	0.62	7.73942	0.00152184	0.235321	0.983423	0.994838	pax8	60637		paired box 8 [Source:HGNC Symbol	Acc:HGNC:8622]	PAX8	5	GO:0003677(molecular_function) ): :DNA binding,GO:0006355(biological_process) ): :regulation of DNA-templated transcription,GO:0005634(cellular_component) ): :nucleus,GO:0000978(molecular_function) ): :RNA polymerase II cis-regulatory region sequence-specific DNA binding,GO:0006357(biological_process) ): :regulation of transcription by RNA polymerase II,GO:0000981(molecular_function) ): :DNA-bind…
ENSDARG00000025549	15.3	14.56	19	14.36	18.34	14.94	166.809	0.00274878	0.167877	0.983318	0.994778	ndufaf1	503714		NADH:ubiquinone oxidoreductase complex assembly factor 1 [Source:ZFIN	Acc:ZDB-GENE-050306-9]	ndufaf1	13	() ): :
ENSDARG00000004616	5.1	4.14	5.94	4.88	5.99	3.84	101.35	0.0027986	0.1896	0.983122	0.994663	mtmr2	30644		myotubularin related protein 2 [Source:ZFIN	Acc:ZDB-GENE-990715-14]	mtmr2	5	() ): :
ENSDARG00000031562	13.21	12.78	15.33	15.02	11.82	13.93	210.712	0.0034335	0.152008	0.983029	0.994663	tada2a	797303		transcriptional adaptor 2A [Source:ZFIN	Acc:ZDB-GENE-060929-508]	tada2a	15	() ): :
ENSDARG00000053480	0.23	0.2	0.1	0.09	0.18	0.25	4.33276	0.00123272	0.238905	0.983071	0.994663	aqp9b	570191		aquaporin 9b [Source:ZFIN	Acc:ZDB-GENE-070911-1]	aqp9b	7	() ): :
ENSDARG00000061363	39.47	41.83	40.47	37.11	36.93	47.25	540.106	-0.00209511	0.124074	0.983158	0.994663	gfod1	556899		Gfo/Idh/MocA-like oxidoreductase domain containing 1 [Source:HGNC Symbol	Acc:HGNC:21096]	GFOD1	24	() ): :
ENSDARG00000074050	4.54	5.97	6.02	6.06	4.37	5.91	60.2083	0.00274045	0.195781	0.983006	0.994663	efnb2b	114402		ephrin-B2b [Source:ZFIN	Acc:ZDB-GENE-010618-1]	efnb2b	1	() ): :
ENSDARG00000078762	3.84	4.49	3.49	4.93	2.44	4.57	29.8539	-0.00189544	0.217006	0.982885	0.994663	tmem169b	570044		transmembrane protein 169 [Source:HGNC Symbol	Acc:HGNC:25130]	TMEM169	9	GO:0016020(cellular_component) ): :membrane
ENSDARG00000088238	40.05	39.5	40.38	34.55	32.48	53.23	1305.7	-0.00221351	0.137273	0.983047	0.994663	kansl1b	567884		KAT8 regulatory NSL complex subunit 1 [Source:HGNC Symbol	Acc:HGNC:24565]	KANSL1	3	GO:0000123(cellular_component) ): :histone acetyltransferase complex,GO:0044545(cellular_component) ): :NSL complex,GO:0035035(molecular_function) ): :histone acetyltransferase binding,() ): :
ENSDARG00000096242	0.23	2.26	0.41	0.94	0.56	1.4	17.5324	-0.00112006	0.235405	0.982996	0.994663	si:ch211-76l23.4	798209				3	() ): :
ENSDARG00000033706	0.98	0.67	0.98	0.46	0.8	1.35	31.9535	0.0025146	0.219366	0.98261	0.994481	adora2aa	561701		adenosine A2a receptor a [Source:ZFIN	Acc:ZDB-GENE-080723-28]	adora2aa	8	() ): :
ENSDARG00000029609	4.05	6.26	3.86	3.71	5.08	5.33	92.8209	-0.00232038	0.194287	0.982479	0.994397	macrod1	447834		mono-ADP ribosylhydrolase 1 [Source:ZFIN	Acc:ZDB-GENE-040912-100]	macrod1	14	() ): :
ENSDARG00000035146	14.97	20.03	20.33	22.6	15.36	16.98	78.6062	-0.00236032	0.19199	0.982482	0.994397	polr2j	554099		RNA polymerase II subunit J [Source:ZFIN	Acc:ZDB-GENE-050522-120]	polr2j	5	() ): :
ENSDARG00000057408	0.37	0.56	0.47	0.28	0.21	0.98	5.90659	-0.00107412	0.23783	0.982412	0.994397	LOC101886389	101886389				15	() ): :
ENSDARG00000117089	1.22	0.95	1.61	1.79	0.83	1.17	10.6165	-0.00143435	0.232062	0.982266	0.994319	zgc:86839	415200		zgc:86839 [Source:ZFIN	Acc:ZDB-GENE-040625-102]	CKS2	21	() ): :
ENSDARG00000040703	9.01	8.76	10.78	11.85	5.27	11.34	67.7383	0.00280466	0.203153	0.982193	0.994314						6	() ): :
ENSDARG00000096229	0.65	0.19	0.59	0.38	0.57	0.46	10.1576	-0.00135611	0.233585	0.982215	0.994314	hrob	561004				3	() ): :
ENSDARG00000078529	37.85	41.5	43.32	60	28.14	32.16	2010.54	0.00325415	0.174801	0.982051	0.994241	adgrb1b	100302472	XR_658929	adhesion G protein-coupled receptor B1 [Source:HGNC Symbol	Acc:HGNC:943]	ADGRB1	19	() ): :
ENSDARG00000114841	6.58	6.62	7.41	5	4.23	11.55	52.3476	0.00271088	0.211444	0.981828	0.994062	LOC100329789	100329789		cyclin and CBS domain divalent metal cation transport mediator 4 [Source:HGNC Symbol	Acc:HGNC:105]	CNNM4	KN150361.1	() ): :
ENSDARG00000074376	19.9	19.44	18.24	20.23	14.87	22.47	638.817	-0.00241788	0.137207	0.981755	0.994035	mdga1	569180		MAM domain containing glycosylphosphatidylinositol anchor 1 [Source:HGNC Symbol	Acc:HGNC:19267]	MDGA1	13	() ): :
ENSDARG00000003846	7.09	7.86	9	8.4	7.95	7.03	47.0555	0.00291258	0.201283	0.981362	0.993949	mrpl21	768305		mitochondrial ribosomal protein L21 [Source:ZFIN	Acc:ZDB-GENE-061027-183]	mrpl21	7	GO:0005737(cellular_component) ): :cytoplasm,GO:0005840(cellular_component) ): :ribosome,GO:0003735(molecular_function) ): :structural constituent of ribosome,GO:0005762(cellular_component) ): :mitochondrial large ribosomal subunit,GO:0043229(cellular_component) ): :intracellular organelle
ENSDARG00000035005	4.87	5.79	6.89	7.29	4.56	5.65	38.1755	-0.00224017	0.209563	0.981622	0.993949	bag2	393975		BCL2 associated athanogene 2 [Source:ZFIN	Acc:ZDB-GENE-040426-1399]	bag2	13	() ): :
ENSDARG00000063522	22.05	23.1	20.45	20.54	20.95	23.67	398.875	-0.00241012	0.132068	0.981531	0.993949	bbs4	768303		Bardet-Biedl syndrome 4 [Source:ZFIN	Acc:ZDB-GENE-060126-2]	bbs4	25	() ): :
ENSDARG00000078383	8.14	8.38	8.78	9.06	9.01	6.57	81.5986	0.00301008	0.188765	0.981625	0.993949	mcrip1	751762		MAPK regulated corepressor interacting protein 1 [Source:ZFIN	Acc:ZDB-GENE-060825-259]	mcrip1	3	() ): :
ENSDARG00000079555	14.13	13.37	18.03	18.61	9.93	16.89	306.622	-0.00258627	0.171408	0.981416	0.993949	ccdc85cb	436901		coiled-coil domain containing 85C, b [Source:NCBI gene (formerly Entrezgene)	Acc:436901]	ccdc85cb	20	() ): :
ENSDARG00000094461	0.32	0.79	0.04	0	0.34	0.9	4.30111	0.000989786	0.241765	0.981543	0.993949						10	() ): :
ENSDARG00000101008	103.96	113.17	103.68	108.01	93.53	117.96	856.544	-0.00216416	0.117876	0.981435	0.993949	soul4	558832		heme-binding protein soul4 [Source:ZFIN	Acc:ZDB-GENE-110718-1]	soul4	22	GO:0020037(molecular_function) ): :heme binding,() ): :
ENSDARG00000101481	10.49	7.14	7.16	10.63	8.33	5.21	66.7618	0.00284627	0.206885	0.981442	0.993949	rbp5	171477		retinol binding protein 1a, cellular [Source:ZFIN	Acc:ZDB-GENE-020320-1]	rbp5	16	() ): :
ENSDARG00000091932	9.86	10.22	11.3	8.78	9.14	13.38	201.887	0.00304868	0.159008	0.981239	0.993931	si:ch211-152p11.8	100536566		si:ch73-25f10.6 [Source:NCBI gene (formerly Entrezgene)	Acc:100536472]	si:ch73-25f10.6	19	() ): :
ENSDARG00000007566	31.07	27.06	31.02	29.93	29.15	28.58	771.051	0.00270784	0.118462	0.980784	0.99384	appbp2	322995		amyloid beta precursor protein (cytoplasmic tail) binding protein 2 [Source:ZFIN	Acc:ZDB-GENE-030131-1715]	appbp2	15	() ): :
ENSDARG00000015515	1.85	2.08	2.43	1.53	2.12	2.71	19.2196	-0.00196556	0.222732	0.981021	0.99384	mc4r	286833		melanocortin 4 receptor [Source:ZFIN	Acc:ZDB-GENE-021223-2]	mc4r	2	() ): :
ENSDARG00000021462	2.13	1.35	1.83	2.28	1.12	1.85	27.671	0.00258066	0.218823	0.980983	0.99384	daw1	556760		dynein assembly factor with WDR repeat domains 1 [Source:ZFIN	Acc:ZDB-GENE-050419-255]	daw1	18	() ): :
ENSDARG00000042937	2.22	2.54	2.29	3.24	2.81	0.81	28.6555	-0.00185081	0.225011	0.980936	0.99384						1	() ): :
ENSDARG00000063385	1.95	0.95	1.8	0.64	2.25	1.71	80.4199	0.00269631	0.215906	0.98107	0.99384	cenpe	767754		centromere protein E [Source:ZFIN	Acc:ZDB-GENE-060929-860]	cenpe	1	() ): :
ENSDARG00000071212	2.73	3.08	3	3.09	2.86	2.69	79.0123	0.00311597	0.184524	0.981032	0.99384	p3h1	553321		prolyl 3-hydroxylase 1 [Source:HGNC Symbol	Acc:HGNC:19316]	P3H1	11	GO:0016491(molecular_function) ): :oxidoreductase activity,GO:0005783(cellular_component) ): :endoplasmic reticulum,GO:0005506(molecular_function) ): :iron ion binding,GO:0016705(molecular_function) ): :oxidoreductase activity, acting on paired donors, with incorporation or reduction of molecular oxygen,GO:0019797(molecular_function) ): :procollagen-proline 3-dioxygenase activity,GO:0031418(molec…
ENSDARG00000073752	10.95	7.33	13.68	15.99	9.5	5.71	204.272	-0.00238448	0.203879	0.981103	0.99384	cacna2d1	101882457		calcium voltage-gated channel auxiliary subunit alpha2delta 1 [Source:HGNC Symbol	Acc:HGNC:1399]	CACNA2D1	18	() ): :
ENSDARG00000077553	18.93	14.17	12.41	15.91	11.44	17.88	51.8824	0.00295451	0.20347	0.980931	0.99384	LOC100332969	100332969				9	() ): :
ENSDARG00000097061	0.37	0.34	0.25	0.2	0.05	0.76	5.6588	-0.00104384	0.239147	0.981096	0.99384						24	() ): :
ENSDARG00000076306	1.18	0.98	0.52	0.2	0.96	1.51	20.1186	0.00206683	0.231519	0.980635	0.993785	loxl3a	568839		lysyl oxidase-like 3a [Source:ZFIN	Acc:ZDB-GENE-070818-2]	loxl3a	14	() ): :,GO:0016020(cellular_component) ): :membrane,GO:0046872(molecular_function) ): :metal ion binding,GO:0016491(molecular_function) ): :oxidoreductase activity,GO:0005507(molecular_function) ): :copper ion binding,GO:0005576(cellular_component) ): :extracellular region,GO:0005615(cellular_component) ): :extracellular space,GO:0016641(molecular_function) ): :oxidoreductase activity, acting on …
ENSDARG00000027159	41.45	31.51	39.41	38.1	32.34	41.37	322.139	-0.00264635	0.143299	0.980481	0.993719	fbxo28	556288		F-box protein 28 [Source:ZFIN	Acc:ZDB-GENE-030131-4665]	fbxo28	13	() ): :
ENSDARG00000043141	0.23	0.68	0.42	0.44	0.53	0.34	22.8827	-0.00188978	0.225646	0.980473	0.993719	si:ch211-132f19.7	560410				17	GO:0016020(cellular_component) ): :membrane,GO:0046872(molecular_function) ): :metal ion binding,GO:0005524(molecular_function) ): :ATP binding,GO:0000166(molecular_function) ): :nucleotide binding,GO:0007189(biological_process) ): :adenylate cyclase-activating G protein-coupled receptor signaling pathway,GO:0035556(biological_process) ): :intracellular signal transduction,GO:0016829(molecular_fu…
ENSDARG00000054251	5.39	5.44	5.96	5.41	5.71	5.34	69.2652	0.00319089	0.187222	0.980434	0.993719	slc66a3	447876		solute carrier family 66 member 3 [Source:ZFIN	Acc:ZDB-GENE-040912-40]	slc66a3	13	() ): :
ENSDARG00000062363	2.74	2.77	1.98	1.54	2.92	2.87	53.7805	0.00296041	0.207707	0.980384	0.993719	phex	386969		phosphate regulating endopeptidase homolog, X-linked [Source:ZFIN	Acc:ZDB-GENE-030103-2]	phex	24	() ): :
ENSDARG00000090577	1.91	1.35	1.15	0.79	1.58	1.94	6.42681	0.00165615	0.236383	0.980409	0.993719	rassf11	561036				8	() ): :
ENSDARG00000115571	0.68	0.79	0.7	0	0.45	1.72	5.50161	0.00130741	0.239898	0.980524	0.993719	LOC101885094	101885094				20	() ): :
ENSDARG00000079474	6.35	5.05	6.6	6.36	4.37	7.15	184.968	0.00324335	0.167913	0.980244	0.993715	msantd2	799368		Myb/SANT DNA binding domain containing 2 [Source:HGNC Symbol	Acc:HGNC:26266]	MSANTD2	10	() ): :
ENSDARG00000044326	1.76	1.42	1.1	0.5	1.39	2.39	81.806	0.00286405	0.216513	0.980178	0.993695						6	() ): :
ENSDARG00000074337	15.68	18.24	22.81	9.55	20.39	26.92	263.545	-0.002634	0.192822	0.980129	0.993691	cbfa2t2	767652		CBFA2/RUNX1 partner transcriptional co-repressor 2 [Source:ZFIN	Acc:ZDB-GENE-070209-1]	cbfa2t2	6	() ): :
ENSDARG00000110729	69.67	49.5	43.61	59.07	66.18	34.87	7.57256	-0.00145189	0.235095	0.980122	0.993691				Purkinje cell protein 4 [Source:HGNC Symbol	Acc:HGNC:8742]	PCP4	15	() ): :
ENSDARG00000045268	0.41	0.75	0.7	1.05	0.39	0.46	7.18666	-0.00136899	0.236263	0.979908	0.993593	tectb	494051		tectorin beta [Source:ZFIN	Acc:ZDB-GENE-041212-16]	tectb	12	() ): :
ENSDARG00000054666	5.07	5.3	5.61	6.82	3.55	5.51	231.861	0.00334879	0.173002	0.97994	0.993593	pgpep1	553547		pyroglutamyl-peptidase I [Source:ZFIN	Acc:ZDB-GENE-050522-88]	pgpep1	2	() ): :
ENSDARG00000044282	6.69	8.23	6.13	4.13	6.37	10.75	194.714	0.00331609	0.192465	0.979752	0.993496	smc5	566749		structural maintenance of chromosomes 5 [Source:ZFIN	Acc:ZDB-GENE-061013-288]	smc5	10	() ): :
ENSDARG00000062268	12	12.02	14.18	12.77	10.92	14.31	556.621	-0.00257485	0.124184	0.979674	0.993463	jarid2b	558456		jumonji and AT-rich interaction domain containing 2b [Source:ZFIN	Acc:ZDB-GENE-060503-246]	jarid2b	19	() ): :
ENSDARG00000075528	1.81	2.09	1.79	1.43	2.15	1.94	10.6861	0.00214301	0.23101	0.979657	0.993463	lyrm9	563525		LYR motif containing 9 [Source:ZFIN	Acc:ZDB-GENE-081022-28]	lyrm9	15	() ): :
ENSDARG00000089503	2.26	2.43	3.18	1.83	2.97	3	61.1299	-0.00268271	0.199487	0.97962	0.993463						19	() ): :
ENSDARG00000016543	2.23	2.14	2.72	2.68	1.88	2.54	28.6591	-0.00242114	0.214061	0.979512	0.993439	mrm3a	550390		mitochondrial rRNA methyltransferase 3a [Source:ZFIN	Acc:ZDB-GENE-050417-184]	mrm3a	15	() ): :
ENSDARG00000004308	7.1	8.27	9.02	8.44	8.57	6.79	133.27	0.00341833	0.174096	0.979327	0.993298	fam8a1b	548347		family with sequence similarity 8 member A1b [Source:ZFIN	Acc:ZDB-GENE-050410-14]	fam8a1b	16	() ): :
ENSDARG00000022772	32.02	28.27	31.46	22.98	27.13	41.25	534.457	0.00336454	0.153258	0.979202	0.993258	osbp2b	561797		oxysterol binding protein 2b [Source:ZFIN	Acc:ZDB-GENE-060526-3]	osbp2b	5	() ): :
ENSDARG00000096972	1.2	1.87	2.29	2.56	1.09	1.69	59.8719	-0.00248194	0.210927	0.979242	0.993258						2	() ): :
ENSDARG00000115603	2.02	4.98	3.25	5.54	1.88	2.64	14.2615	0.00216594	0.231709	0.979111	0.993219						8	() ): :
ENSDARG00000025718	13.84	15.65	16.57	15.48	13.85	16.45	264.337	-0.00292067	0.141313	0.978544	0.992971	cxxc1b	360150		CXXC finger protein 1b [Source:ZFIN	Acc:ZDB-GENE-030728-4]	cxxc1b	11	() ): :
ENSDARG00000028000	141.02	120.02	127.91	130.15	122.54	132.74	4801.6	-0.00154077	0.101742	0.978816	0.992971	pfkpa	560944		phosphofructokinase, platelet [Source:HGNC Symbol	Acc:HGNC:8878]	PFKP	24	GO:0016740(molecular_function) ): :transferase activity,GO:0005737(cellular_component) ): :cytoplasm,GO:0046872(molecular_function) ): :metal ion binding,GO:0005524(molecular_function) ): :ATP binding,GO:0000166(molecular_function) ): :nucleotide binding,GO:0016301(molecular_function) ): :kinase activity,GO:0016310(biological_process) ): :phosphorylation,GO:0016020(cellular_component) ): :membran…
ENSDARG00000060646	3.39	3.67	4.02	3.29	3.53	4.14	99.9819	0.00352872	0.174252	0.978413	0.992971	senp5	570299		SUMO specific peptidase 5 [Source:ZFIN	Acc:ZDB-GENE-050208-772]	senp5	22	() ): :
ENSDARG00000062519	0.76	0.62	0.56	0.62	0.8	0.5	23.8361	-0.00233372	0.220344	0.978501	0.992971	abcc13	559093				24	() ): :
ENSDARG00000062834	12.44	13.68	13.53	15.41	12.5	11.25	179.571	-0.00306595	0.165843	0.978517	0.992971	ecsit	569243		ECSIT signaling integrator [Source:ZFIN	Acc:ZDB-GENE-030131-1332]	ecsit	7	() ): :
ENSDARG00000070430	0.3	0.51	0.49	0.6	0.45	0.24	6.77704	-0.00148134	0.236218	0.978802	0.992971	chtopb	768163		chromatin target of PRMT1b [Source:ZFIN	Acc:ZDB-GENE-061013-712]	chtopb	16	() ): :
ENSDARG00000076767	0.7	0.34	0.64	0.63	0.42	0.59	8.08325	0.00199408	0.234351	0.978574	0.992971	pgfb	557468		placental growth factor [Source:HGNC Symbol	Acc:HGNC:8893]	PGF	17	GO:0016020(cellular_component) ): :membrane,GO:0008083(molecular_function) ): :growth factor activity,GO:0005615(cellular_component) ): :extracellular space,GO:0050930(biological_process) ): :induction of positive chemotaxis,GO:0050918(biological_process) ): :positive chemotaxis,GO:0045766(biological_process) ): :positive regulation of angiogenesis,GO:0001934(biological_process) ): :positive regu…
ENSDARG00000087247	144.01	106.88	108.57	97.06	122.5	138.43	1378.39	-0.00328054	0.142466	0.978723	0.992971	kcnab2a	797337		potassium voltage-gated channel subfamily A regulatory beta subunit 2 [Source:HGNC Symbol	Acc:HGNC:6229]	KCNAB2	11	GO:0016020(cellular_component) ): :membrane,GO:0005737(cellular_component) ): :cytoplasm,GO:0005856(cellular_component) ): :cytoskeleton,GO:0006811(biological_process) ): :monoatomic ion transport,GO:0005886(cellular_component) ): :plasma membrane,GO:0016491(molecular_function) ): :oxidoreductase activity,GO:0006813(biological_process) ): :potassium ion transport,GO:0042995(cellular_component) ):…
ENSDARG00000089456	7.03	6.44	6.99	5.55	6.86	7.95	162.982	-0.00303909	0.161623	0.978661	0.992971	men1	30130		multiple endocrine neoplasia I [Source:ZFIN	Acc:ZDB-GENE-991110-12]	men1	7	() ): :
ENSDARG00000090685	2.16	1.79	2.6	2.1	2.4	2	11.6072	-0.00190392	0.229867	0.978725	0.992971	tmem241	101885957		transmembrane protein 241 [Source:HGNC Symbol	Acc:HGNC:31723]	TMEM241	24	() ): :
ENSDARG00000105527	0.54	0.43	1.61	0.17	0.84	1.41	4.36899	0.00136682	0.239997	0.978821	0.992971	si:ch73-256g18.2	557975		small integral membrane protein 36 [Source:HGNC Symbol	Acc:HGNC:53654]	SMIM36	12	GO:0016020(cellular_component) ): :membrane,() ): :
ENSDARG00000110056	9.12	5.1	3.61	4.22	6.86	6.31	19.4974	0.0025361	0.226608	0.978582	0.992971						21	() ): :
ENSDARG00000110744	3.79	1.32	1.52	2.59	1.94	2.18	5.00898	-0.00130204	0.238218	0.978821	0.992971	cytl1	101886995				14	() ): :
ENSDARG00000063177	6.28	3.79	6.84	6.75	5.4	4.53	84.0452	-0.00290953	0.197087	0.978215	0.992962	manf	767691		mesencephalic astrocyte-derived neurotrophic factor [Source:ZFIN	Acc:ZDB-GENE-060929-640]	manf	22	() ): :
ENSDARG00000037909	7.88	9.26	12.18	11.04	8.71	8.97	91.6897	0.0035591	0.186669	0.978167	0.99296	timm29	553583		translocase of inner mitochondrial membrane 29 [Source:ZFIN	Acc:ZDB-GENE-050522-380]	timm29	3	() ): :
ENSDARG00000037708	15.46	13.78	13.41	11.17	14.51	16.48	411.65	0.00351496	0.146071	0.978004	0.992841	exosc10	394064		exosome component 10 [Source:ZFIN	Acc:ZDB-GENE-040426-781]	exosc10	23	() ): :
ENSDARG00000040812	0.62	2.22	1.5	0.66	1.61	1.94	26.3237	0.00255343	0.227674	0.977994	0.992841	ncf4	403014		neutrophil cytosolic factor 4 [Source:ZFIN	Acc:ZDB-GENE-041124-1]	ncf4	22	() ): :,GO:0005737(cellular_component) ): :cytoplasm,GO:0035091(molecular_function) ): :phosphatidylinositol binding,GO:0006909(biological_process) ): :phagocytosis,GO:0016176(molecular_function) ): :superoxide-generating NADPH oxidase activator activity,GO:0042554(biological_process) ): :superoxide anion generation,GO:0043020(cellular_component) ): :NADPH oxidase complex,GO:0045730(biological_pr…
ENSDARG00000100157	5.46	5.93	4.25	4.37	5.77	5.14	49.6138	0.00336895	0.203179	0.977889	0.992818	tamm41	641323		TAM41 mitochondrial translocator assembly and maintenance homolog [Source:NCBI gene (formerly Entrezgene)	Acc:641323]	tamm41	11	() ): :
ENSDARG00000039626	87.89	146.88	138.24	231.18	68.31	60.27	805.901	0.00275804	0.229961	0.977608	0.992596	nrgna	567608		neurogranin (protein kinase C substrate, RC3) a [Source:ZFIN	Acc:ZDB-GENE-090710-4]	nrgna	5	() ): :
ENSDARG00000067596	0.12	0.17	0.26	0.15	0.19	0.21	4.24089	-0.00136103	0.238677	0.977625	0.992596	fancb	108179053				9	() ): :
ENSDARG00000070490	0.8	1.71	0	0	0.58	1.9	4.73096	0.00120941	0.241953	0.977483	0.992545						1	() ): :
ENSDARG00000032862	2.18	2.19	1.94	1.87	2.23	2.17	49.3958	-0.00305875	0.199344	0.97727	0.992375	ugt5g1	570913		UDP glucuronosyltransferase 5 family, polypeptide G1 [Source:ZFIN	Acc:ZDB-GENE-080305-10]	ugt5g1	7	GO:0016020(cellular_component) ): :membrane,GO:0016740(molecular_function) ): :transferase activity,GO:0016757(molecular_function) ): :glycosyltransferase activity,GO:0015020(molecular_function) ): :glucuronosyltransferase activity,GO:0008194(molecular_function) ): :UDP-glycosyltransferase activity
ENSDARG00000002285	4.27	4.7	6.37	3.02	5.57	6.71	291.784	-0.00325534	0.182793	0.977167	0.992342	mcoln1a	406689		mucolipin TRP cation channel 1a [Source:ZFIN	Acc:ZDB-GENE-040426-2704]	mcoln1a	1	() ): :
ENSDARG00000056268	10.91	8.36	9.51	10.15	7.96	10.61	214.879	-0.00323464	0.156568	0.977191	0.992342	atxn7l2b	436928		ataxin 7-like 2b [Source:ZFIN	Acc:ZDB-GENE-040718-403]	atxn7l2b	8	() ): :
ENSDARG00000031325	0.12	0.1	0.11	0.12	0.09	0.12	4.32609	-0.00141318	0.238406	0.977063	0.992306	tmed1a	445093		transmembrane p24 trafficking protein 1a [Source:ZFIN	Acc:ZDB-GENE-040801-229]	tmed1a	3	() ): :
ENSDARG00000079327	3.36	3.06	4.44	1.76	3.48	5.76	85.6494	0.00338051	0.208948	0.977028	0.992306	hmcn2	565032				8	() ): :,GO:0005886(cellular_component) ): :plasma membrane,GO:0005509(molecular_function) ): :calcium ion binding,GO:0005576(cellular_component) ): :extracellular region,GO:0030198(biological_process) ): :extracellular matrix organization,GO:0035122(biological_process) ): :embryonic medial fin morphogenesis,GO:0043589(biological_process) ): :skin morphogenesis,GO:0090497(biological_process) ): :m…
ENSDARG00000095697	5.43	3.31	2.33	3.17	2.91	5.21	12.2596	-0.00199527	0.23116	0.976797	0.992128						1	() ): :
ENSDARG00000034368	20.94	23.65	24.54	24.29	23.22	20.69	333.031	-0.00321389	0.144527	0.976715	0.992121	hexb	323613		hexosaminidase B (beta polypeptide) [Source:ZFIN	Acc:ZDB-GENE-030131-2333]	hexb	5	() ): :
ENSDARG00000098805	0.61	0.44	0.37	0	0.64	0.81	6.52452	-0.00130583	0.239054	0.976744	0.992121	vwa11	565211				1	() ): :
ENSDARG00000030981	18.42	19.04	16.27	17.52	17.33	18.07	222.69	0.00368855	0.150773	0.97651	0.992029	tmem127	553545		transmembrane protein 127 [Source:ZFIN	Acc:ZDB-GENE-050522-97]	tmem127	8	() ): :
ENSDARG00000105410	1.26	1.39	1.35	1.41	1.41	1.06	9.70159	0.00238275	0.232101	0.976562	0.992029	LOC100536361	100536361		si:ch73-269m14.3 [Source:ZFIN	Acc:ZDB-GENE-120215-13]	si:ch73-269m14.3	7	() ): :
ENSDARG00000117331	1.08	0.94	0.3	0.3	0.53	1.52	10.3938	0.00207583	0.235699	0.976539	0.992029						16	() ): :
ENSDARG00000023722	1.87	1.32	2.38	2.07	1.77	1.59	21.1164	-0.00253524	0.221872	0.976397	0.992002	hcrtr2	561260		hypocretin (orexin) receptor 2 [Source:ZFIN	Acc:ZDB-GENE-070228-3]	hcrtr2	13	() ): :
ENSDARG00000016238	87.38	76.81	91.76	94.73	85.59	71.69	950.664	-0.00317922	0.138341	0.976337	0.991987	arl6ip5b	436790		ADP-ribosylation factor-like 6 interacting protein 5b [Source:ZFIN	Acc:ZDB-GENE-040718-223]	arl6ip5b	23	() ): :
ENSDARG00000078773	8.39	8.42	10.44	12.04	9.55	5.18	70.8791	-0.00306927	0.206023	0.976214	0.991909	tmem70	100002535		transmembrane protein 70 [Source:HGNC Symbol	Acc:HGNC:26050]	TMEM70	2	GO:0016020(cellular_component) ): :membrane,GO:0005739(cellular_component) ): :mitochondrion,GO:0033615(biological_process) ): :mitochondrial proton-transporting ATP synthase complex assembly,() ): :
ENSDARG00000006420	27.18	26.31	24.27	25.6	21.8	30.26	1874.5	-0.00292896	0.117835	0.976125	0.991906	atrnl1b	569196		attractin like 1 [Source:HGNC Symbol	Acc:HGNC:29063]	ATRNL1	12	GO:0016020(cellular_component) ): :membrane,GO:0005112(molecular_function) ): :Notch binding,GO:0048856(biological_process) ): :anatomical structure development
ENSDARG00000027172	19.96	23	24.19	26.86	16.31	23.2	365.763	0.00383352	0.157976	0.976165	0.991906	phactr2	570136				13	() ): :
ENSDARG00000001733	20.69	19.24	19.56	17.76	21.04	19.6	327.689	0.00501333	0.140403	0.975951	0.991808	gulp1a	368404		GULP PTB domain containing engulfment adaptor 1a [Source:ZFIN	Acc:ZDB-GENE-030616-21]	gulp1a	9	() ): :
ENSDARG00000056985	1.4	4.45	2.84	2.54	3.09	2.74	33.2786	0.00311611	0.221366	0.975936	0.991808	tpte	327292		transmembrane phosphatase with tensin homology [Source:ZFIN	Acc:ZDB-GENE-030131-5503]	tpte	10	() ): :
ENSDARG00000091946	2.73	0.88	1.32	2.07	1.51	1.44	13.7046	-0.00208993	0.230901	0.975977	0.991808	si:ch211-139k8.2	101886418				2	() ): :
ENSDARG00000093074	0.2	0.86	0.46	0.13	0.85	0.53	4.71986	-0.00133682	0.239549	0.975976	0.991808	si:ch211-139g16.8	101885410				3	GO:0016020(cellular_component) ): :membrane,GO:0005886(cellular_component) ): :plasma membrane
ENSDARG00000094799	1.7	1.31	1.97	0	2.28	2.57	27.1206	0.002218	0.235663	0.975712	0.991726						4	() ): :
ENSDARG00000045692	21.14	23.76	22.41	28.79	19.76	18.19	248.607	-0.00349334	0.169784	0.975612	0.99167	pphln1	790935		periphilin 1 [Source:ZFIN	Acc:ZDB-GENE-030131-1873]	pphln1	4	() ): :
ENSDARG00000006840	1.27	1.77	1.64	1.22	1.88	1.44	38.3049	0.00358186	0.210417	0.97533	0.991606	gnmt	403338		glycine N-methyltransferase [Source:ZFIN	Acc:ZDB-GENE-040227-1]	gnmt	17	() ): :
ENSDARG00000030665	11.02	10.73	10.96	9.39	9.24	13.9	336.728	0.00381444	0.146425	0.975259	0.991606	tcerg1b	797473				21	() ): :
ENSDARG00000035009	1.76	1.54	1.39	1.21	1.4	2.02	31.1836	0.00345572	0.213347	0.975503	0.991606	trim35-27	334253		tripartite motif containing 35-27 [Source:ZFIN	Acc:ZDB-GENE-030131-6185]	trim35-27	14	() ): :
ENSDARG00000056210	1.91	2.51	1.91	1.83	1.62	2.98	40.353	-0.00306735	0.209842	0.975428	0.991606	hspa1b	798846		heat shock protein family A (Hsp70) member 1B [Source:ZFIN	Acc:ZDB-GENE-060503-867]	hspa1b	8	() ): :
ENSDARG00000067639	9.35	11.31	10.31	10.69	10.29	9.37	172.805	0.00426855	0.162335	0.975474	0.991606	prpf4	326944		PRP4 pre-mRNA processing factor 4 homolog (yeast) [Source:ZFIN	Acc:ZDB-GENE-030131-5143]	prpf4	5	() ): :
ENSDARG00000068179	10.39	10.14	10.88	12.03	9.73	9.29	529.58	-0.00334414	0.139062	0.97536	0.991606				tribbles pseudokinase 2 [Source:HGNC Symbol	Acc:HGNC:30809]	TRIB2	20	() ): :
ENSDARG00000077762	8.99	8.37	10.35	6.01	9.66	12.04	125.213	-0.00346797	0.184807	0.975477	0.991606	slc2a4rg	368491				23	() ): :
ENSDARG00000097261	3.2	5.79	4.3	2.07	5.74	5.45	15.3408	-0.00223593	0.229477	0.97541	0.991606	LOC100148023	100148023				22	() ): :
ENSDARG00000028475	6.92	7.17	7.44	6.3	7.7	7.29	134.053	-0.00359329	0.166191	0.975126	0.991596	lin9	560867		lin-9 DREAM MuvB core complex component [Source:ZFIN	Acc:ZDB-GENE-030131-1747]	lin9	20	() ): :
ENSDARG00000030161	6.4	5.03	7.3	5.86	6.35	6.32	162.302	-0.00359194	0.164071	0.975076	0.991596	ppp1r14bb	100000577		protein phosphatase 1, regulatory (inhibitor) subunit 14Bb [Source:ZFIN	Acc:ZDB-GENE-030616-595]	ppp1r14bb	7	() ): :
ENSDARG00000041750	18.85	17.95	20.94	17.07	19.82	20.26	414.056	-0.003267	0.130582	0.975091	0.991596	ccdc92	571995		coiled-coil domain containing 92 [Source:ZFIN	Acc:ZDB-GENE-051113-120]	ccdc92	8	GO:0008150(biological_process) ): :biological_process,GO:0003674(molecular_function) ): :molecular_function
ENSDARG00000057272	37.01	29.9	36.05	38.73	34.64	28	794.275	-0.00347228	0.146865	0.975066	0.991596	slc30a9	497184		solute carrier family 30 member 9 [Source:ZFIN	Acc:ZDB-GENE-040724-254]	slc30a9	14	() ): :
ENSDARG00000110186	0.55	0.85	0.81	0.8	0.4	1.05	22.5238	-0.00259605	0.223444	0.975016	0.991596	cdcp1b	560859		CUB domain containing protein 1 [Source:HGNC Symbol	Acc:HGNC:24357]	CDCP1	19	() ): :
ENSDARG00000063553	10.79	10.22	13.16	10.13	11.13	12.4	689.429	0.00249509	0.124014	0.974892	0.991592	rlf	562452				17	() ): :
ENSDARG00000073771	29.76	26.08	29.15	26.5	26.11	31.41	815.851	0.00349978	0.111753	0.974787	0.991531	tbc1d12b	100332088				12	GO:0005096(molecular_function) ): :GTPase activator activity,GO:0055037(cellular_component) ): :recycling endosome,GO:0005776(cellular_component) ): :autophagosome,GO:2000785(biological_process) ): :regulation of autophagosome assembly,() ): :
ENSDARG00000095353	0.61	0.65	1.53	0.95	0.86	1.01	5.68284	-0.00169175	0.237212	0.974763	0.991531						16	() ): :
ENSDARG00000017590	7.05	4.64	7.9	6.33	6.95	6.06	73.9005	-0.00353788	0.193715	0.974464	0.991296	nit2	402904		nitrilase family, member 2 [Source:ZFIN	Acc:ZDB-GENE-050522-65]	nit2	6	() ): :
ENSDARG00000035329	26.39	23.93	26.94	16.63	33.01	25.7	173.315	0.0041751	0.183836	0.974415	0.991293	capns1a	550598		calpain, small subunit 1 a [Source:ZFIN	Acc:ZDB-GENE-030113-3]	capns1a	5	() ): :
ENSDARG00000000656	1.81	2.94	2.42	0.35	4.11	2.38	23.0996	0.00278171	0.232038	0.972789	0.99109	psmb9a	30665		proteasome 20S subunit beta 9a [Source:ZFIN	Acc:ZDB-GENE-990415-140]	psmb9a	19	() ): :
ENSDARG00000005356	7.36	6.52	6.33	5.48	7.7	6.82	233.662	-0.00375751	0.160851	0.97386	0.99109	tyro3	30709		TYRO3 protein tyrosine kinase [Source:ZFIN	Acc:ZDB-GENE-990714-13]	tyro3	17	() ): :
ENSDARG00000013414	24.29	24.21	26.79	31.73	21.55	21.14	664.525	-0.00373326	0.153056	0.973467	0.99109	lin7a	393682		lin-7 homolog A (C. elegans) [Source:ZFIN	Acc:ZDB-GENE-040426-1665]	lin7a	4	() ): :
ENSDARG00000015546	32.35	30.87	28.78	28.3	30.66	31.59	388.926	0.00397485	0.133582	0.973108	0.99109	alpl	393982		alkaline phosphatase, biomineralization associated [Source:ZFIN	Acc:ZDB-GENE-040420-1]	alpl	11	() ): :
ENSDARG00000022810	14.7	14.17	17.61	14.76	13.47	18.13	308.297	-0.003677	0.140513	0.97309	0.99109	fzr1b	100148604				2	GO:0031145(biological_process) ): :anaphase-promoting complex-dependent catabolic process,GO:0005680(cellular_component) ): :anaphase-promoting complex,GO:0010997(molecular_function) ): :anaphase-promoting complex binding,GO:0097027(molecular_function) ): :ubiquitin-protein transferase activator activity,GO:1990757(molecular_function) ): :ubiquitin ligase activator activity,GO:1905786(biological_…
ENSDARG00000024167	12.34	12.8	10.69	9.31	11.2	15.07	353.185	0.00425439	0.155611	0.973216	0.99109	kcnh1a	560568		potassium voltage-gated channel, subfamily H (eag-related), member 1a [Source:ZFIN	Acc:ZDB-GENE-061226-1]	kcnh1a	17	() ): :
ENSDARG00000025108	21.32	19.63	20.49	15.59	17.69	27.9	721.743	0.00417772	0.150828	0.972965	0.99109	magixa	796857				8	() ): :,GO:0016020(cellular_component) ): :membrane,GO:0005737(cellular_component) ): :cytoplasm,GO:0007165(biological_process) ): :signal transduction,GO:0016301(molecular_function) ): :kinase activity,GO:0016310(biological_process) ): :phosphorylation,GO:0005911(cellular_component) ): :cell-cell junction
ENSDARG00000026941	3.7	3.07	3.4	3.57	2.34	4.35	104.781	-0.00372406	0.185012	0.973813	0.99109	fbxl4	492349		F-box and leucine-rich repeat protein 4 [Source:ZFIN	Acc:ZDB-GENE-041114-187]	fbxl4	16	() ): :
ENSDARG00000029112	1.54	7.23	7.67	13.85	1.39	1.15	76.8455	-0.00118582	0.239962	0.97337	0.99109	gem	560566		GTP binding protein overexpressed in skeletal muscle [Source:ZFIN	Acc:ZDB-GENE-060825-251]	gem	16	() ): :
ENSDARG00000031876	11.81	7.72	15.54	9.61	11.38	13.4	172.792	0.00442399	0.181483	0.973528	0.99109	pard6ga	100170824		par-6 family cell polarity regulator gamma a [Source:ZFIN	Acc:ZDB-GENE-050923-1]	pard6ga	16	() ): :
ENSDARG00000034667	0.63	0.71	0.68	0.92	0.49	0.55	11.4021	0.00276112	0.230846	0.973325	0.99109	LOC100331214	100331214				22	() ): :
ENSDARG00000039130	3.6	2.58	1.53	2.08	2.67	2.75	17.517	0.00320504	0.226775	0.972883	0.99109	cdkn3	402796		cyclin dependent kinase inhibitor 3 [Source:ZFIN	Acc:ZDB-GENE-060427-2]	cdkn3	13	GO:0016787(molecular_function) ): :hydrolase activity,GO:0005737(cellular_component) ): :cytoplasm,GO:0005634(cellular_component) ): :nucleus,GO:0007049(biological_process) ): :cell cycle,GO:0004725(molecular_function) ): :protein tyrosine phosphatase activity,GO:0004721(molecular_function) ): :phosphoprotein phosphatase activity,GO:0016311(biological_process) ): :dephosphorylation,GO:0048471(cel…
ENSDARG00000040695	3.7	1.1	2.91	3.62	2	1.92	22.3303	-0.002615	0.227709	0.972511	0.99109	fkbp14	445077		FKBP prolyl isomerase 14 [Source:ZFIN	Acc:ZDB-GENE-040801-210]	fkbp14	16	() ): :
ENSDARG00000045904	0.33	0.71	0.39	0.18	0.58	0.69	9.43464	-0.00198901	0.234841	0.973612	0.99109	nr2e3	492496		nuclear receptor subfamily 2, group E, member 3 [Source:ZFIN	Acc:ZDB-GENE-041114-63]	nr2e3	25	() ): :
ENSDARG00000056078	14.8	14.66	15.59	17.14	13.14	14.04	348.442	0.00409326	0.143003	0.97302	0.99109	rftn2	406729		raftlin family member 2 [Source:ZFIN	Acc:ZDB-GENE-040426-2760]	rftn2	9	() ): :
ENSDARG00000059743	2.33	1.92	0.76	2.01	1.18	1.9	26.3584	-0.00274685	0.224664	0.973225	0.99109	tmem98	569392		transmembrane protein 98 [Source:ZFIN	Acc:ZDB-GENE-070112-1092]	tmem98	3	GO:0016020(cellular_component) ): :membrane,GO:0005886(cellular_component) ): :plasma membrane,GO:0008150(biological_process) ): :biological_process,GO:0005576(cellular_component) ): :extracellular region,GO:0005783(cellular_component) ): :endoplasmic reticulum,GO:0003674(molecular_function) ): :molecular_function
ENSDARG00000073970	0.38	0.08	0.14	0.54	0	0.03	7.23633	0.00161802	0.240948	0.972902	0.99109	mctp2b	562526				7	() ): :
ENSDARG00000077900	0.85	0.81	0.77	1.33	0.81	0.31	9.4442	-0.0019986	0.235106	0.973929	0.99109	si:ch211-141o9.10	558198				12	GO:0003677(molecular_function) ): :DNA binding,GO:0016787(molecular_function) ): :hydrolase activity,GO:0006281(biological_process) ): :DNA repair,GO:0046872(molecular_function) ): :metal ion binding,GO:0005634(cellular_component) ): :nucleus,GO:0008270(molecular_function) ): :zinc ion binding,GO:0005739(cellular_component) ): :mitochondrion,GO:0006974(biological_process) ): :cellular response to…
ENSDARG00000079473	3.15	2.85	2.52	3.18	2.83	2.43	99.2619	-0.00372296	0.183312	0.973872	0.99109	map3k21	561518		mitogen-activated protein kinase kinase kinase 21 [Source:HGNC Symbol	Acc:HGNC:29798]	MAP3K21	13	() ): :
ENSDARG00000088825	64.84	66.79	65.13	67.43	47.94	81.87	3151.52	-0.00345045	0.134933	0.974053	0.99109	LOC100333880	100333880		citron rho-interacting serine/threonine kinase [Source:HGNC Symbol	Acc:HGNC:1985]	CIT	8	() ): :
ENSDARG00000089340	55.04	33.25	41.36	67.2	25.42	33.81	1039.92	0.00346839	0.21705	0.973756	0.99109	rhobtb2b	565844		Rho related BTB domain containing 2 [Source:HGNC Symbol	Acc:HGNC:18756]	RHOBTB2	10	() ): :,GO:0003924(molecular_function) ): :GTPase activity,GO:0005525(molecular_function) ): :GTP binding,GO:0007163(biological_process) ): :establishment or maintenance of cell polarity,GO:0005886(cellular_component) ): :plasma membrane,GO:0019901(molecular_function) ): :protein kinase binding,GO:0007015(biological_process) ): :actin filament organization,GO:0007264(biological_process) ): :small…
ENSDARG00000090472	1.3	1.48	1.52	1.67	1.32	1.3	19.8447	-0.00281061	0.221675	0.974136	0.99109	ttll10	100147863				23	() ): :
ENSDARG00000091727	0.32	1.21	0.22	0.5	0.48	0.86	6.88683	-0.00165663	0.237752	0.974047	0.99109	LOC558876	558876				15	() ): :
ENSDARG00000093677	21.83	19.86	16.01	15.85	26.68	14.01	26.8119	-0.00285871	0.220351	0.97417	0.99109	ppp1r17	101884119		protein phosphatase 1 regulatory subunit 17 [Source:ZFIN	Acc:ZDB-GENE-091204-123]	ppp1r17	24	() ): :
ENSDARG00000094977	1	0.8	0.92	1.01	0.39	1.33	22.5445	0.00312302	0.22485	0.974113	0.99109	troap	795944				23	() ): :
ENSDARG00000096433	3.38	4.01	4.38	5.28	2.29	4.14	52.5655	0.00398779	0.208084	0.97308	0.99109						20	() ): :
ENSDARG00000097487	0.98	0.46	1.14	0.73	1.03	0.81	8.25988	0.00237963	0.234358	0.974044	0.99109	pfn4	556873		profilin family member 4 [Source:ZFIN	Acc:ZDB-GENE-131121-583]	pfn4	17	() ): :
ENSDARG00000097780	2.64	1.11	1.13	1.32	1.19	2.18	5.40365	-0.00167239	0.237788	0.974081	0.99109						3	() ): :
ENSDARG00000099395	20.32	14.64	17.06	15.33	14.5	21.76	259.763	0.00431354	0.159859	0.973023	0.99109	cables1	100126070		Cdk5 and Abl enzyme substrate 1 [Source:ZFIN	Acc:ZDB-GENE-070912-509]	cables1	2	() ): :
ENSDARG00000099535	8.47	10.51	8.46	10.12	6.64	10.48	197.222	0.00447887	0.170294	0.973399	0.99109	si:ch73-379j16.2	108179154				14	() ): :
ENSDARG00000101628	1.51	0.72	1.53	0.73	1.66	1.33	13.8433	-0.00242572	0.230179	0.973796	0.99109	ascl1b	30478		achaete-scute family bHLH transcription factor 1b [Source:NCBI gene (formerly Entrezgene)	Acc:30478]	ascl1b	7	() ): :
ENSDARG00000103284	2.57	3.41	2.23	3.2	2.53	2.29	45.4461	0.00383626	0.207591	0.974033	0.99109						2	() ): :
ENSDARG00000103642	0.44	0.47	0.17	0.08	0.12	0.92	5.317	0.00170116	0.239787	0.974062	0.99109	pglyrp6	571817		peptidoglycan recognition protein 6 [Source:ZFIN	Acc:ZDB-GENE-071227-2]	pglyrp6	3	GO:0008270(molecular_function) ): :zinc ion binding,GO:0002376(biological_process) ): :immune system process,GO:0009253(biological_process) ): :peptidoglycan catabolic process,GO:0050830(biological_process) ): :defense response to Gram-positive bacterium,GO:0008745(molecular_function) ): :N-acetylmuramoyl-L-alanine amidase activity,GO:0016019(molecular_function) ): :peptidoglycan immune receptor …
ENSDARG00000104683	0.84	0.67	1.52	0.39	0.69	2.07	9.00169	-0.00186278	0.235773	0.974041	0.99109						2	() ): :
ENSDARG00000110900	1.48	1.57	1.09	0.66	1.88	1.49	53.1829	0.00380458	0.214332	0.972908	0.99109	LOC100333871	100333871				KN149959.1	() ): :
ENSDARG00000111211	0.56	0.54	1.15	0.53	0.6	1.08	8.92171	0.00251029	0.233998	0.972997	0.99109	fam216a	100150820				21	() ): :
ENSDARG00000112884	0.21	0.09	0.19	0.16	0.1	0.25	7.29424	-0.00195275	0.235766	0.97314	0.99109						KN149695.1	() ): :
ENSDARG00000113859	3.82	3.58	4.34	2.36	5.89	3.51	17.1164	-0.00271818	0.227028	0.97283	0.99109	LOC100536453	100536453				KN150327.1	() ): :
ENSDARG00000075904	4.46	5.41	4.87	7.16	3.34	3.92	133.724	0.00436193	0.195106	0.972415	0.991077	rfx1b	555183		regulatory factor X1 [Source:HGNC Symbol	Acc:HGNC:9982]	RFX1	1	() ): :
ENSDARG00000010331	1.81	1.52	1.76	1.45	1.4	2.3	24.5296	-0.00322533	0.217939	0.972153	0.991042						5	() ): :
ENSDARG00000017835	4.88	8.57	7.5	5.39	7.67	7.82	164.958	-0.00376056	0.183804	0.972302	0.991042	brf1a	334402		BRF1 RNA polymerase III transcription initiation factor subunit a [Source:ZFIN	Acc:ZDB-GENE-030131-6334]	brf1a	13	() ): :
ENSDARG00000030938	0.63	0.28	0.41	0.19	0.42	0.69	10.8213	0.00264775	0.233458	0.972221	0.991042	fermt3b	393878		FERM domain containing kindlin 3b [Source:ZFIN	Acc:ZDB-GENE-040426-1366]	fermt3b	14	() ): :
ENSDARG00000059081	0.85	1.55	1.4	1.49	0.24	2.25	13.9926	-0.00219119	0.234023	0.971762	0.991042	LOC100002503	100002503		serine protease 35 [Source:HGNC Symbol	Acc:HGNC:21387]	PRSS35	23	() ): :
ENSDARG00000069583	51.67	21.16	20.11	72.33	8.39	12.74	577.853	-0.00141212	0.237745	0.971919	0.991042	cndp1	619255		carnosine dipeptidase 1 [Source:ZFIN	Acc:ZDB-GENE-050913-105]	cndp1	16	() ): :
ENSDARG00000092045	1.04	2.13	1.66	2.06	1.47	1.15	17.1432	0.00316883	0.227162	0.972257	0.991042						24	() ): :
ENSDARG00000094017	0.54	0.49	0.49	0.4	0.44	0.69	16.4024	0.00330705	0.225234	0.971891	0.991042						4	() ): :
ENSDARG00000094763	0.29	0.41	0.52	0.59	0.27	0.38	4.00079	-0.00164601	0.239117	0.97219	0.991042	npy2r	100003852		neuropeptide Y receptor Y2 [Source:HGNC Symbol	Acc:HGNC:7957]	NPY2R	1	() ): :
ENSDARG00000101461	0.57	0.56	0.37	0.84	0.37	0.21	4.73228	-0.0016905	0.238673	0.972246	0.991042	emp3b	560722		epithelial membrane protein 3b (MAM blood group) [Source:ZFIN	Acc:ZDB-GENE-050913-51]	emp3b	23	GO:0016020(cellular_component) ): :membrane,GO:0005886(cellular_component) ): :plasma membrane,GO:0003674(molecular_function) ): :molecular_function
ENSDARG00000101618	12.26	12.17	17.23	15.1	13.83	11.5	38.0049	0.00411211	0.20895	0.971696	0.991042				deoxynucleotidyltransferase terminal interacting protein 1 [Source:HGNC Symbol	Acc:HGNC:16160]	DNTTIP1	6	() ): :
ENSDARG00000109289	2.85	2.73	3.53	3.18	3.05	2.66	171.603	0.00447885	0.16398	0.972082	0.991042	mrps15	436758		mitochondrial ribosomal protein S15 [Source:NCBI gene (formerly Entrezgene)	Acc:436758]	mrps15	16	() ): :
ENSDARG00000113323	31.34	17.53	15.99	4	26.26	36.83	19.1865	-0.00229042	0.232304	0.972216	0.991042				Metazoan signal recognition particle RNA [Source:RFAM	Acc:RF00017]	Metazoa_SRP	11	GO:0006617(biological_process) ): :SRP-dependent cotranslational protein targeting to membrane, signal sequence recognition,GO:0005786(cellular_component) ): :signal recognition particle, endoplasmic reticulum targeting
ENSDARG00000114081	4.51	3.61	3.22	4.4	3.24	3.53	140.429	0.00450078	0.177441	0.972259	0.991042	LOC110440104	110440104				11	() ): :
ENSDARG00000116649	10.89	11.92	10.71	13.9	11.95	7.13	115.921	-0.00386198	0.193332	0.972162	0.991042	ube2e1	563542		ubiquitin-conjugating enzyme E2E 1 [Source:ZFIN	Acc:ZDB-GENE-071004-16]	ube2e1	19	() ): :
ENSDARG00000117241	0.46	0.92	0.33	0.37	0.72	0.57	15.9856	0.00298774	0.230017	0.972335	0.991042						15	() ): :
ENSDARG00000117533	0.28	0.07	0.33	0.23	0.09	0.4	5.06878	-0.00163297	0.239011	0.972251	0.991042	nadsyn1	798974		NAD synthetase 1 [Source:ZFIN	Acc:ZDB-GENE-070615-22]	nadsyn1	7	() ): :
ENSDARG00000052376	0.6	0.45	0.33	0.23	0.34	0.88	7.21089	-0.0020126	0.236398	0.971437	0.990875	b3gnt2a	405766		UDP-GlcNAc:betaGal beta-1,3-N-acetylglucosaminyltransferase 2a [Source:ZFIN	Acc:ZDB-GENE-090312-192]	b3gnt2a	1	() ): :
ENSDARG00000054136	0.72	0.28	0	0.24	0.37	0.34	4.69966	0.00172939	0.240589	0.971223	0.99074	ccdc105	565570				15	() ): :
ENSDARG00000070015	1.09	1.34	1.17	1.1	1.07	1.31	6.37526	0.00243636	0.235826	0.971194	0.99074						4	() ): :
ENSDARG00000073891	4.33	1.9	4.92	1.64	4.59	4.6	43.9529	0.00362409	0.220731	0.971259	0.99074	gdf10b	794493		growth differentiation factor 10b [Source:ZFIN	Acc:ZDB-GENE-120316-1]	gdf10b	12	() ): :
ENSDARG00000027112	1.21	0.83	0.97	0.59	1.11	1.34	32.8313	-0.00340642	0.216426	0.971072	0.99069	ephb4b	30691		eph receptor B4b [Source:ZFIN	Acc:ZDB-GENE-990415-65]	ephb4b	23	() ): :
ENSDARG00000029671	20.07	16.75	20.44	18.79	18	19.57	678.268	0.00411605	0.118364	0.970924	0.990662	xpr1b	558034		xenotropic and polytropic retrovirus receptor 1b [Source:ZFIN	Acc:ZDB-GENE-060503-266]	xpr1b	2	() ): :
ENSDARG00000041081	29.81	25.58	30.1	28.11	26.64	30.05	1161.72	-0.00332516	0.106375	0.970968	0.990662	kmt5b	572849		lysine methyltransferase 5B [Source:ZFIN	Acc:ZDB-GENE-041114-22]	kmt5b	18	() ): :
ENSDARG00000057142	0.87	1.55	1.32	1.08	0.54	2.29	8.11597	-0.0021351	0.235619	0.970869	0.990662	zgc:194252	561367		zgc:194252 [Source:ZFIN	Acc:ZDB-GENE-081022-86]	zgc:194252	7	GO:0005575(cellular_component) ): :cellular_component,GO:0008150(biological_process) ): :biological_process,GO:0003674(molecular_function) ): :molecular_function
ENSDARG00000077307	8.05	9.02	9.16	7.95	8.29	9.88	230.717	-0.00408705	0.145584	0.970999	0.990662	tmem201	563814		transmembrane protein 201 [Source:ZFIN	Acc:ZDB-GENE-070410-61]	tmem201	23	() ): :
ENSDARG00000014986	51.21	49.37	54.76	51.08	49.79	52.07	1209.52	0.0035226	0.102459	0.970791	0.990637	acvr1l	30615		activin A receptor, type 1 like [Source:ZFIN	Acc:ZDB-GENE-990415-9]	acvr1l	2	() ): :
ENSDARG00000062865	30.04	45.19	44.13	40.39	36.39	41.7	794.611	-0.00397736	0.145005	0.970768	0.990637	mrasb	100317924		muscle RAS oncogene homolog [Source:HGNC Symbol	Acc:HGNC:7227]	MRAS	22	() ): :
ENSDARG00000101125	2.26	1.79	1.87	0.93	1.93	3.2	9.89992	-0.00239418	0.233223	0.970741	0.990637						13	() ): :
ENSDARG00000055124	59.98	53.46	69.98	60.45	57.01	64.28	1134.36	-0.00355774	0.113474	0.970571	0.990553	ccnl1a	553269		cyclin L1a [Source:ZFIN	Acc:ZDB-GENE-050419-206]	ccnl1a	18	() ): :
ENSDARG00000028192	4.5	5.25	4.71	4.68	4.84	4.95	19.2022	-0.0032658	0.221702	0.970279	0.990336	cradd	450046		CASP2 and RIPK1 domain containing adaptor with death domain [Source:ZFIN	Acc:ZDB-GENE-041010-168]	cradd	4	() ): :
ENSDARG00000099677	0.52	1.03	0.61	1.11	0.49	0.59	9.1608	-0.00232526	0.234257	0.970313	0.990336	bambib	431736		BMP and activin membrane-bound inhibitor homolog (Xenopus laevis) b [Source:ZFIN	Acc:ZDB-GENE-040704-30]	bambib	2	() ): :
ENSDARG00000079035	1.59	1.98	1.96	2.04	1.49	2.1	35.5284	-0.00383148	0.209125	0.970041	0.990186						15	() ): :
ENSDARG00000095528	0.79	0.71	0.98	0.08	0.84	1.52	21.494	0.00296777	0.232772	0.970075	0.990186	LOC108179100	108179100				15	() ): :
ENSDARG00000101911	3.87	4.52	3.96	3.29	3.13	5.91	57.8635	0.00453526	0.201837	0.970013	0.990186						13	() ): :
ENSDARG00000052011	9.34	9.82	12.9	14.6	8.6	8.01	170.849	0.00480396	0.187092	0.969935	0.990184	rrad	327396		Ras-related associated with diabetes [Source:ZFIN	Acc:ZDB-GENE-030131-5607]	rrad	7	() ): :
ENSDARG00000075972	34.55	31.08	29.12	30.82	29.06	34.44	640.378	-0.00402376	0.124417	0.969862	0.990156	csrnp2	100003989		cysteine and serine rich nuclear protein 2 [Source:HGNC Symbol	Acc:HGNC:16006]	CSRNP2	23	GO:0005634(cellular_component) ): :nucleus,GO:0006357(biological_process) ): :regulation of transcription by RNA polymerase II,GO:0000981(molecular_function) ): :DNA-binding transcription factor activity, RNA polymerase II-specific,GO:0043565(molecular_function) ): :sequence-specific DNA binding,() ): :
ENSDARG00000006567	2.01	2.44	2.99	2.62	2.49	2.29	25.3081	-0.00356236	0.217117	0.969749	0.990087	dus4l	445096		dihydrouridine synthase 4-like (S. cerevisiae) [Source:ZFIN	Acc:ZDB-GENE-040801-233]	dus4l	4	() ): :
ENSDARG00000060569	25.03	20.11	24.42	18.12	25.01	25.82	278.685	-0.0043485	0.155069	0.9697	0.990087	tmem229b	767735		transmembrane protein 229B [Source:NCBI gene (formerly Entrezgene)	Acc:767735]	tmem229b	17	() ): :
ENSDARG00000099042	2.93	2.23	3.19	3.41	2.76	1.89	39.3746	0.00429683	0.211579	0.969726	0.990087	cfap157	794225		cilia and flagella associated protein 157 [Source:NCBI gene (formerly Entrezgene)	Acc:794225]	cfap157	5	() ): :
ENSDARG00000101175	11.54	11.48	11	10.59	10.65	12.28	131.091	0.00483443	0.163541	0.969636	0.990087	mcu	768182		mitochondrial calcium uniporter [Source:ZFIN	Acc:ZDB-GENE-061013-24]	mcu	13	() ): :
ENSDARG00000003165	3	3.02	2.39	2.79	1.73	4.16	58.2331	-0.00395398	0.206294	0.969512	0.990033	nr2f6b	406522		nuclear receptor subfamily 2, group F, member 6b [Source:ZFIN	Acc:ZDB-GENE-040426-2351]	nr2f6b	11	() ): :
ENSDARG00000008623	20.29	19.09	24.16	22.36	22.59	17.61	234.63	-0.0043723	0.160816	0.969466	0.990032				COP9 signalosome subunit 3 [Source:HGNC Symbol	Acc:HGNC:2239]	COPS3	12	() ): :
ENSDARG00000068140	4.16	5.47	6.15	5.53	4.61	5.62	138.453	-0.00432181	0.171678	0.969328	0.989938	si:dkey-24l11.2	100034462		si:dkey-24l11.2 [Source:ZFIN	Acc:ZDB-GENE-050419-208]	si:dkey-24l11.2	18	() ): :,GO:0005634(cellular_component) ): :nucleus,GO:0046872(molecular_function) ): :metal ion binding,GO:0008270(molecular_function) ): :zinc ion binding,GO:0015031(biological_process) ): :protein transport,GO:0005643(cellular_component) ): :nuclear pore,GO:0031965(cellular_component) ): :nuclear membrane,GO:0043227(cellular_component) ): :membrane-bounded organelle
ENSDARG00000006869	2.23	0.79	0.96	2.04	0.85	0.96	11.7004	0.00281985	0.233763	0.969253	0.989934	stx17	492808		syntaxin 17 [Source:ZFIN	Acc:ZDB-GENE-041114-164]	stx17	16	() ): :
ENSDARG00000099918	2.96	1.52	3.43	2.03	2.59	3.09	23.7217	0.00387496	0.22154	0.969278	0.989934	arl4aa	393834		ADP-ribosylation factor-like 4aa [Source:ZFIN	Acc:ZDB-GENE-040426-1878]	arl4aa	15	() ): :
ENSDARG00000036974	1.84	1.82	2	1.85	1.13	2.81	24.9346	-0.00346743	0.220233	0.96912	0.989866	ripply3	654448		ripply transcriptional repressor 3 [Source:ZFIN	Acc:ZDB-GENE-060113-3]	ripply3	10	() ): :
ENSDARG00000105575	1.62	1.67	1.19	1.86	1.23	1.4	22.4783	-0.00345457	0.220836	0.969046	0.989838	si:dkey-6n21.12	100003436				7	GO:0005886(cellular_component) ): :plasma membrane,GO:0030054(cellular_component) ): :cell junction,GO:0035332(biological_process) ): :positive regulation of hippo signaling
ENSDARG00000010586	3.07	2.65	2.67	3.87	2.51	1.77	32.6493	0.00414666	0.217128	0.968984	0.989821	tex9	553441		testis expressed 9 [Source:ZFIN	Acc:ZDB-GENE-110623-3]	tex9	7	() ): :
ENSDARG00000044809	2.81	2.6	2.58	2.6	2.25	3.04	70.1631	0.00482587	0.187169	0.968857	0.989738	fpgs	406746		folylpolyglutamate synthase [Source:ZFIN	Acc:ZDB-GENE-040426-2781]	fpgs	21	() ): :
ENSDARG00000053291	1041.5	962.12	1423.45	1403.35	933.75	1046.98	6011.97	-0.00373133	0.148414	0.968834	0.989738	pnrc2	565522		proline-rich nuclear receptor coactivator 2 [Source:ZFIN	Acc:ZDB-GENE-030131-5475]	pnrc2	16	() ): :
ENSDARG00000069318	52.58	49.34	62.22	54.32	44.78	64.57	1289.97	-0.00450392	0.12314	0.968836	0.989738	efr3bb	561353		EFR3 homolog B [Source:HGNC Symbol	Acc:HGNC:29155]	EFR3B	20	() ): :
ENSDARG00000086631	2.1	2.56	2.92	2.13	2.72	2.54	99.4092	0.00509606	0.181209	0.96875	0.989738	LOC101884653	101884653				22	() ): :
ENSDARG00000078989	0.3	2.07	0.42	0.49	1.01	1.26	19.9955	0.00295886	0.233902	0.968497	0.989557	alpk3a	100321139				18	() ): :
ENSDARG00000087225	0.84	0.5	0.25	0.98	0.29	0.39	5.36969	0.00221153	0.238735	0.968137	0.989237	si:ch73-361p23.3	100330352				6	GO:0016020(cellular_component) ): :membrane,GO:0038023(molecular_function) ): :signaling receptor activity,GO:0042127(biological_process) ): :regulation of cell population proliferation,() ): :
ENSDARG00000001817	68.25	61.07	59.97	64.32	51.45	71.75	289.186	0.0050188	0.145935	0.967135	0.989222	zmp:0000000521	798602				2	() ): :
ENSDARG00000005423	27.17	25.94	30.01	32.1	29.24	20.33	354.161	-0.00474812	0.164829	0.967365	0.989222	pgam1a	323107		phosphoglycerate mutase 1a [Source:ZFIN	Acc:ZDB-GENE-030131-1827]	pgam1a	13	() ): :
ENSDARG00000014280	14.78	19.59	17	19.89	11.25	20.53	563.825	-0.00466768	0.165446	0.967793	0.989222	dlgap1a	569898		discs, large (Drosophila) homolog-associated protein 1a [Source:ZFIN	Acc:ZDB-GENE-030616-580]	dlgap1a	2	() ): :
ENSDARG00000020847	5.43	5.33	5.66	6.5	4.62	5.22	193.783	-0.00469993	0.160529	0.967652	0.989222	atp6v0a1a	324307		ATPase H+ transporting V0 subunit a1a [Source:ZFIN	Acc:ZDB-GENE-030131-3027]	atp6v0a1a	3	() ): :
ENSDARG00000026766	33.98	32.22	36.72	33.56	36.74	30.2	405.278	0.00483611	0.141496	0.967899	0.989222	bcl2l10	373113		BCL2 like 10 [Source:ZFIN	Acc:ZDB-GENE-030825-2]	bcl2l10	18	() ): :
ENSDARG00000036685	30.13	28.65	35.39	34.39	28.91	29.85	1042.75	-0.0041184	0.123355	0.967924	0.989222	ccnt2a	327568		cyclin T2a [Source:ZFIN	Acc:ZDB-GENE-030131-5779]	ccnt2a	9	() ): :
ENSDARG00000041511	3.38	3.04	3.69	3.79	3.44	2.77	46.4006	-0.00435071	0.202943	0.967701	0.989222	pex10	449821		peroxisomal biogenesis factor 10 [Source:ZFIN	Acc:ZDB-GENE-041010-71]	pex10	8	() ): :
ENSDARG00000043079	5.25	3.7	2.61	2.34	3.72	5.35	36.052	0.00356353	0.217863	0.968078	0.989222	mmp23ba	101882601		matrix metallopeptidase 23B [Source:HGNC Symbol	Acc:HGNC:7171]	MMP23B	8	() ): :
ENSDARG00000055175	1.15	1.06	1.43	0.85	0.8	1.97	8.75054	0.00293401	0.233962	0.967994	0.989222	c1qtnf6a	565113		C1q and TNF related 6 [Source:HGNC Symbol	Acc:HGNC:14343]	C1QTNF6	3	GO:0005576(cellular_component) ): :extracellular region,GO:0005615(cellular_component) ): :extracellular space,() ): :
ENSDARG00000057736	6.13	4.3	5.35	5.42	5.28	4.93	132.736	-0.00410998	0.172691	0.968012	0.989222	ano10a	566425		anoctamin 10a [Source:NCBI gene (formerly Entrezgene)	Acc:566425]	ano10a	16	() ): :
ENSDARG00000069545	7.82	9.49	11.59	7.33	10.98	10.42	36.5515	-0.00407815	0.210425	0.967872	0.989222	atg12	570965		ATG12 autophagy related 12 homolog (S. cerevisiae) [Source:ZFIN	Acc:ZDB-GENE-071205-7]	atg12	16	() ): :
ENSDARG00000071360	0.85	1.03	0.88	0.9	0.8	1.12	7.16782	-0.00248519	0.234875	0.967866	0.989222	morn2	751675		MORN repeat containing 2 [Source:ZFIN	Acc:ZDB-GENE-060825-230]	morn2	17	() ): :
ENSDARG00000079623	6.87	6.29	4.83	3.88	5.9	8.01	82.0727	0.00508114	0.197944	0.967048	0.989222	ubtd1b	571832		ubiquitin domain containing 1b [Source:ZFIN	Acc:ZDB-GENE-050913-62]	ubtd1b	12	() ): :
ENSDARG00000088408	0.81	0.99	0.58	0.25	0.47	1.68	18.223	0.00325479	0.232212	0.967329	0.989222						19	() ): :
ENSDARG00000093531	1.71	3.83	5.23	9.43	0.33	1.01	21.684	-0.00208756	0.237365	0.967415	0.989222	LOC108179058	108179058				10	() ): :
ENSDARG00000095921	96.34	72.84	78.03	81.07	95.73	63.31	321.115	0.00518352	0.168716	0.967781	0.989222	si:ch1073-325m22.2	100333135		si:ch1073-325m22.2 [Source:NCBI gene (formerly Entrezgene)	Acc:100333135]	si:ch1073-325m22.2	2	() ): :
ENSDARG00000097217	1.77	1.2	1.1	0.35	1.23	2.46	13.3883	0.00305403	0.233184	0.968056	0.989222	si:dkey-229e3.2	561960				17	() ): :
ENSDARG00000097753	30.28	36.9	42.45	35.65	40.66	30.04	122.562	0.00501201	0.180493	0.967713	0.989222	slirp	368358		SRA stem-loop interacting RNA binding protein [Source:ZFIN	Acc:ZDB-GENE-030729-30]	slirp	17	() ): :
ENSDARG00000098203	0.14	0.84	0.39	0.53	0.4	0.38	5.89869	0.00242477	0.238065	0.967137	0.989222				APC down-regulated 1 [Source:HGNC Symbol	Acc:HGNC:15718]	APCDD1	2	() ): :
ENSDARG00000098342	1.53	0.78	0.4	0.63	0.93	1.05	23.3171	0.00363533	0.227587	0.96751	0.989222						13	() ): :
ENSDARG00000098983	26.31	20.72	15.85	16.64	20.54	26.07	54.3687	-0.00429494	0.20385	0.967808	0.989222						12	() ): :
ENSDARG00000099842	2.8	2.16	2.8	2.88	2.27	2.42	24.7562	0.00434973	0.217227	0.967232	0.989222	si:ch73-156l6.2	103910310	XR_660463			3	() ): :
ENSDARG00000100219	7.63	6.85	4.31	6.54	9.95	1.18	201.744	0.0031594	0.235049	0.96698	0.989222						4	() ): :
ENSDARG00000102615	5.13	5.26	4	5.3	3.18	5.82	60.7097	0.00498259	0.201244	0.967145	0.989222	fra10ac1	449836		FRA10A associated CGG repeat 1 [Source:ZFIN	Acc:ZDB-GENE-041010-95]	fra10ac1	12	() ): :
ENSDARG00000102813	10.9	10.93	9.12	11.11	8.34	11.02	35.3964	0.00463917	0.209213	0.967685	0.989222						13	() ): :
ENSDARG00000117001	1.11	0.36	0.31	0.96	0.32	0.45	6.43717	0.00242204	0.237884	0.967679	0.989222						14	() ): :
ENSDARG00000053475	16.14	22.61	24.92	35.65	14.16	13.1	556.995	-0.00399465	0.199125	0.966761	0.989093	ngb	100000711		neuroglobin [Source:ZFIN	Acc:ZDB-GENE-011102-1]	ngb	17	() ): :
ENSDARG00000115108	0.48	0.81	0.75	0.7	0.58	0.71	23.3847	0.00425514	0.219675	0.966664	0.98904	si:dkeyp-46h3.1	100317613		cilia and flagella associated protein 90 [Source:HGNC Symbol	Acc:HGNC:27028]	CFAP90	19	() ): :
ENSDARG00000046087	19.44	16.08	22.68	17.31	15.81	24.52	454.557	0.00520093	0.149082	0.966556	0.988977	brd2b	569354		bromodomain containing 2b [Source:ZFIN	Acc:ZDB-GENE-070220-1]	brd2b	16	() ): :
ENSDARG00000097884	30.83	25.79	31.48	28.69	24.23	34.22	165.166	0.00527763	0.160416	0.966542	0.988977						2	() ): :
ENSDARG00000058165	1.85	2.73	2.02	2.29	1.87	2.29	30.6929	0.00464575	0.213533	0.966457	0.988969	htr2ab	559806		5-hydroxytryptamine receptor 2A [Source:HGNC Symbol	Acc:HGNC:5293]	HTR2A	6	GO:0016020(cellular_component) ): :membrane,GO:0007268(biological_process) ): :chemical synaptic transmission,GO:0005886(cellular_component) ): :plasma membrane,GO:0004930(molecular_function) ): :G protein-coupled receptor activity,GO:0007165(biological_process) ): :signal transduction,GO:0007186(biological_process) ): :G protein-coupled receptor signaling pathway,GO:0051209(biological_process) )…
ENSDARG00000031712	29.61	35.23	34.16	36.06	30.25	31.92	929.881	-0.00438577	0.126381	0.966402	0.988959	grm3	565256		glutamate receptor, metabotropic 3 [Source:ZFIN	Acc:ZDB-GENE-061009-13]	grm3	18	() ): :
ENSDARG00000009493	32.37	30.62	31.6	28.46	27.38	37.96	1017.26	0.00456187	0.119029	0.966291	0.988893	si:ch211-45c16.2	568412		mitogen-activated protein kinase kinase kinase 13 [Source:HGNC Symbol	Acc:HGNC:6852]	MAP3K13	9	GO:0016740(molecular_function) ): :transferase activity,GO:0004672(molecular_function) ): :protein kinase activity,GO:0005524(molecular_function) ): :ATP binding,GO:0000166(molecular_function) ): :nucleotide binding,GO:0016301(molecular_function) ): :kinase activity,GO:0016310(biological_process) ): :phosphorylation,GO:0004674(molecular_function) ): :protein serine/threonine kinase activity,GO:00…
ENSDARG00000001930	10.94	10.51	12.47	12.02	9.09	12.39	374.333	0.00498441	0.138792	0.966073	0.988717	klhl15	445186		kelch-like family member 15 [Source:ZFIN	Acc:ZDB-GENE-040801-99]	klhl15	24	() ): :
ENSDARG00000015254	17.27	19.94	20.74	18.14	20.57	18.02	356.501	0.0051332	0.143051	0.965922	0.988608	fzr1a	393223		fizzy/cell division cycle 20 related 1a [Source:ZFIN	Acc:ZDB-GENE-040426-712]	fzr1a	8	() ): :
ENSDARG00000077341	27.91	18.77	24.25	19.9	24.9	24.84	1299.24	0.00477739	0.141213	0.96587	0.988608	ppp1r14c	568055		protein phosphatase 1, regulatory (inhibitor) subunit 14C [Source:ZFIN	Acc:ZDB-GENE-050706-92]	ppp1r14c	23	() ): :
ENSDARG00000089862	12.84	13.38	13.19	11.8	10.72	17.15	213.452	-0.00495921	0.159297	0.965883	0.988608	si:dkey-16j16.4	492696				17	GO:0005575(cellular_component) ): :cellular_component,GO:0008150(biological_process) ): :biological_process,GO:0003674(molecular_function) ): :molecular_function
ENSDARG00000027618	14.16	12.17	11.26	10.37	9.83	17.81	485.127	-0.00498532	0.163351	0.965632	0.988539	grip2b	562290		glutamate receptor interacting protein 2 [Source:HGNC Symbol	Acc:HGNC:23841]	GRIP2	22	() ): :,GO:0098887(biological_process) ): :neurotransmitter receptor transport, endosome to postsynaptic membrane
ENSDARG00000040633	11.8	10.42	14.83	13.78	10.62	11.93	224.793	0.00541509	0.159259	0.965527	0.988539	LOC556054	556054		protein arginine methyltransferase 8 [Source:HGNC Symbol	Acc:HGNC:5188]	PRMT8	18	() ): :
ENSDARG00000058050	7.07	5.89	4.66	3.97	4.1	10.06	70.9492	-0.004347	0.209457	0.965711	0.988539	smyd3	569507		SET and MYND domain containing 3 [Source:ZFIN	Acc:ZDB-GENE-051120-138]	smyd3	17	() ): :
ENSDARG00000059582	4.81	5.47	4.65	4.28	4.43	6.05	76.5746	0.00556325	0.187235	0.965581	0.988539	sowahcb	563244		sosondowah ankyrin repeat domain family Cb [Source:ZFIN	Acc:ZDB-GENE-061215-96]	sowahcb	6	() ): :
ENSDARG00000077677	1.24	0.93	0.79	0.6	0.93	1.49	32.8646	-0.00431927	0.217755	0.965419	0.988539	pdgfd	100535718		platelet derived growth factor D [Source:HGNC Symbol	Acc:HGNC:30620]	PDGFD	15	() ): :
ENSDARG00000090503	2.52	2.04	1.64	1.25	2	3.02	49.9327	-0.00437681	0.2104	0.965511	0.988539	oma1	100331186		OMA1 zinc metallopeptidase [Source:NCBI gene (formerly Entrezgene)	Acc:100331186]	OMA1	20	() ): :
ENSDARG00000091699	1.91	2.24	2.32	2.03	2.56	1.66	109.384	0.00554745	0.185888	0.965474	0.988539	capn2a	541374		calpain 2, (m/II) large subunit a [Source:ZFIN	Acc:ZDB-GENE-050320-69]	capn2a	13	() ): :
ENSDARG00000094308	0.28	0.37	0.18	0.31	0.13	0.42	8.3662	0.00297434	0.235195	0.965652	0.988539						4	() ): :
ENSDARG00000104572	0.06	0.16	0.18	0.11	0.06	0.26	5.87278	-0.00226973	0.237939	0.96543	0.988539						14	() ): :
ENSDARG00000104672	8.08	11.55	11.64	14.1	13.54	1.49	470.444	0.00309299	0.235879	0.965716	0.988539	LOC100535428	100535428				KN149880.1	() ): :
ENSDARG00000024295	5.56	4.77	3.94	3.73	4.44	6.22	72.793	-0.00490166	0.19487	0.965105	0.988418	slc11a2	678623		solute carrier family 11 member 2 [Source:ZFIN	Acc:ZDB-GENE-021115-1]	slc11a2	11	() ): :
ENSDARG00000045164	5.59	5.26	5.61	3.74	6.99	5.18	60.5733	0.00524963	0.201702	0.965141	0.988418	nptx2b	556906		neuronal pentraxin IIb [Source:ZFIN	Acc:ZDB-GENE-110328-1]	nptx2b	12	() ): :
ENSDARG00000058452	11.73	10.31	9.16	9.82	7.93	13.37	226.066	0.0028199	0.16622	0.964992	0.988359	abhd17c	393126		abhydrolase domain containing 17C, depalmitoylase [Source:NCBI gene (formerly Entrezgene)	Acc:393126]	abhd17c	7	() ): :
ENSDARG00000115657	6.42	8.09	7.88	8.03	8.01	6.03	469.154	-0.00503812	0.155714	0.964973	0.988359	prkcaa	497384		protein kinase C, alpha, a [Source:ZFIN	Acc:ZDB-GENE-050208-100]	prkcaa	6	() ): :
ENSDARG00000042737	0.34	0.36	0.52	0.3	0.11	0.87	11.28	-0.00272703	0.234759	0.964878	0.988336	slc52a3	678609		solute carrier family 52 member 3 [Source:NCBI gene (formerly Entrezgene)	Acc:678609]	slc52a3	8	GO:0016020(cellular_component) ): :membrane,GO:0005886(cellular_component) ): :plasma membrane,GO:0032217(molecular_function) ): :riboflavin transmembrane transporter activity,GO:0032218(biological_process) ): :riboflavin transport
ENSDARG00000059348	4.73	4.2	7.3	3.56	4.54	8.37	56.3541	-0.00454316	0.209383	0.964552	0.988165	rxfp3.3b	101883306				25	GO:0016020(cellular_component) ): :membrane,GO:0005886(cellular_component) ): :plasma membrane,GO:0004930(molecular_function) ): :G protein-coupled receptor activity,GO:0007165(biological_process) ): :signal transduction,GO:0007186(biological_process) ): :G protein-coupled receptor signaling pathway,GO:0007204(biological_process) ): :positive regulation of cytosolic calcium ion concentration,GO:0…
ENSDARG00000075343	1.42	0.59	1.33	1.14	0.93	1.31	26.2753	-0.00399522	0.220568	0.964595	0.988165	csf1a	100004617		colony stimulating factor 1a (macrophage) [Source:ZFIN	Acc:ZDB-GENE-080204-107]	csf1a	11	() ): :
ENSDARG00000078691	35.61	36.11	39.68	33.23	32.26	45.86	1535.86	-0.00497815	0.118778	0.964665	0.988165	gigyf1b	100002679		GRB10 interacting GYF protein 1 [Source:HGNC Symbol	Acc:HGNC:9126]	GIGYF1	10	() ): :
ENSDARG00000098753	122.74	115.51	139.24	126.41	126.53	116.91	2234.7	0.00462313	0.113629	0.96462	0.988165	elmo1	406364		engulfment and cell motility 1 (ced-12 homolog, C. elegans) [Source:ZFIN	Acc:ZDB-GENE-040426-2069]	elmo1	19	() ): :
ENSDARG00000045856	13.28	11.04	10.41	11.12	11.73	11.77	60.5589	-0.00510458	0.193719	0.964386	0.988066	fgf6b	494455		fibroblast growth factor 6b [Source:ZFIN	Acc:ZDB-GENE-050201-5]	fgf6b	4	() ): :
ENSDARG00000002613	3.63	5.43	4.06	3.97	4.77	3.91	18.9911	0.00438227	0.223335	0.964274	0.98803	rpa3	393196		replication protein A3 [Source:ZFIN	Acc:ZDB-GENE-040426-977]	rpa3	19	() ): :
ENSDARG00000076027	44.49	38.57	50.33	33.83	50.05	46.79	1441.25	0.00545052	0.141836	0.964305	0.98803	kif5c	565563		kinesin family member 5C [Source:ZFIN	Acc:ZDB-GENE-081105-14]	kif5c	9	() ): :
ENSDARG00000078419	0.17	0.47	0.2	0.17	0.13	0.6	17.3926	-0.00295926	0.232949	0.964148	0.987962	LOC101884302	101884302		filamin A interacting protein 1a [Source:NCBI gene (formerly Entrezgene)	Acc:571659]	filip1a	17	() ): :
ENSDARG00000018953	6.91	6.4	6.28	7.11	6.47	5.51	110.063	0.00573347	0.177411	0.964043	0.987946	gclm	333974		glutamate-cysteine ligase, modifier subunit [Source:ZFIN	Acc:ZDB-GENE-030131-5906]	gclm	8	() ): :
ENSDARG00000033172	0.55	0.72	0.64	0.65	0.46	0.77	19.1997	0.00439155	0.222766	0.963992	0.987946	nr2f5	30427		nuclear receptor subfamily 2, group F, member 5 [Source:ZFIN	Acc:ZDB-GENE-990415-253]	nr2f5	16	GO:0003677(molecular_function) ): :DNA binding,GO:0003700(molecular_function) ): :DNA-binding transcription factor activity,GO:0006355(biological_process) ): :regulation of DNA-templated transcription,GO:0005634(cellular_component) ): :nucleus,GO:0046872(molecular_function) ): :metal ion binding,GO:0008270(molecular_function) ): :zinc ion binding,GO:0043565(molecular_function) ): :sequence-specif…
ENSDARG00000078145	13.3	12.49	12.59	10.73	9.68	18.41	456.425	-0.00512432	0.16184	0.964086	0.987946	arhgap46b	568268				23	() ): :
ENSDARG00000091916	5.48	5.89	4.79	5.7	3.81	6.84	101.195	-0.00516744	0.186608	0.964017	0.987946	ugt5b4	791210		UDP glucuronosyltransferase 5 family, polypeptide B4 [Source:ZFIN	Acc:ZDB-GENE-070112-2332]	ugt5b4	1	() ): :
ENSDARG00000110160	1.38	1.08	1.17	1.72	1.39	0.49	12.3571	-0.00316748	0.231991	0.964004	0.987946	sbspon	100151218		somatomedin B and thrombospondin type 1 domain containing [Source:HGNC Symbol	Acc:HGNC:30362]	SBSPON	24	() ): :
ENSDARG00000043713	5.52	5.63	7.32	7.2	5.27	5.96	90.3624	-0.00526594	0.184176	0.963605	0.987897	asf1bb	792029		anti-silencing function 1Bb histone chaperone [Source:NCBI gene (formerly Entrezgene)	Acc:792029]	asf1bb	1	() ): :
ENSDARG00000053158	2.24	1.54	1.79	2.13	1.61	1.91	13.2853	-0.00354589	0.228234	0.963732	0.987897						2	() ): :
ENSDARG00000055653	4.49	5.54	5.85	5.46	5.12	5.28	43.1982	-0.00492362	0.202983	0.96381	0.987897	nubp2	641290		nucleotide binding protein 2 (MinD homolog, E. coli) [Source:ZFIN	Acc:ZDB-GENE-051023-10]	nubp2	24	() ): :
ENSDARG00000062693	51.65	46.55	55.24	45.68	42.28	64.22	1789.01	0.00499344	0.125631	0.963805	0.987897	nrxn3b	570698		neurexin 3b [Source:ZFIN	Acc:ZDB-GENE-070206-10]	nrxn3b	20	() ): :
ENSDARG00000099298	3.35	3.69	3.73	2.89	3.93	3.7	111.471	0.00587403	0.175966	0.963728	0.987897	xrcc5	449848		X-ray repair complementing defective repair in Chinese hamster cells 5 [Source:ZFIN	Acc:ZDB-GENE-041008-108]	xrcc5	9	() ): :
ENSDARG00000100751	16.79	13.78	15.45	15.69	13.03	16.6	91.4966	0.00577159	0.178713	0.963773	0.987897	syndig1	792553		synapse differentiation inducing 1 [Source:HGNC Symbol	Acc:HGNC:15885]	SYNDIG1	KN150663.1	() ): :
ENSDARG00000098177	0.52	0.94	0.6	1.33	0.17	0.62	23.7859	-0.00316754	0.231558	0.963384	0.987742						4	() ): :
ENSDARG00000102610	15.35	14.12	16.21	13.69	10.99	20.79	402.522	0.00578617	0.158838	0.963357	0.987742	r3hdm2	100330669		R3H domain containing 2 [Source:HGNC Symbol	Acc:HGNC:29167]	R3HDM2	6	() ): :
ENSDARG00000021864	379.67	335.1	423.19	372.03	371.6	373.12	1897.83	0.004703	0.109316	0.963041	0.987702	rplp1	336719		ribosomal protein lateral stalk subunit P1 [Source:ZFIN	Acc:ZDB-GENE-030131-8663]	rplp1	19	() ): :
ENSDARG00000027930	0.69	1.05	0.94	0.92	0.56	1.17	16.7506	0.00419418	0.226258	0.963254	0.987702	naprt	393864		nicotinate phosphoribosyltransferase [Source:ZFIN	Acc:ZDB-GENE-040426-1897]	naprt	20	() ): :
ENSDARG00000069540	0.29	0.4	0.34	0.22	0.24	0.61	11.2074	-0.00320588	0.232199	0.963102	0.987702	si:dkey-30c15.2	558938		si:dkey-30c15.2 [Source:ZFIN	Acc:ZDB-GENE-060503-543]	si:dkey-30c15.2	18	() ): :
ENSDARG00000075803	0.18	0.07	0.15	0.14	0.08	0.19	7.31556	-0.00273708	0.23586	0.963136	0.987702	slc41a2a	564932				25	() ): :,GO:0016020(cellular_component) ): :membrane,GO:0006811(biological_process) ): :monoatomic ion transport,GO:0005886(cellular_component) ): :plasma membrane,GO:0055085(biological_process) ): :transmembrane transport,GO:0006812(biological_process) ): :monoatomic cation transport,GO:0098655(biological_process) ): :monoatomic cation transmembrane transport,GO:0008324(molecular_function) ): :mo…
ENSDARG00000076831	8.6	6.16	8.1	6.1	7.47	9.33	64.0215	-0.00516409	0.194731	0.963231	0.987702	iqck	793880		IQ motif containing K [Source:ZFIN	Acc:ZDB-GENE-081022-109]	iqck	3	() ): :
ENSDARG00000107442	1.6	1.14	1.37	1.33	1.25	1.41	14.1847	0.00413227	0.226992	0.963192	0.987702	slc35d3	565603		solute carrier family 35 member D3 [Source:HGNC Symbol	Acc:HGNC:15621]	SLC35D3	20	() ): :
ENSDARG00000071150	14.87	18.61	17.72	15.36	15.34	20.48	1816.73	-0.00493916	0.124416	0.96295	0.987671	cica	560266				19	() ): :
ENSDARG00000025672	0.88	0.56	0.88	0.48	0.42	1.42	9.45308	0.00334363	0.234325	0.962824	0.987668	antxr1a	793153		ANTXR cell adhesion molecule 1 [Source:HGNC Symbol	Acc:HGNC:21014]	ANTXR1	8	() ): :
ENSDARG00000029907	0.88	0.43	0.4	1.02	0.38	0.27	4.00349	-0.00198251	0.240034	0.962901	0.987668	trim54	563772		tripartite motif containing 54 [Source:ZFIN	Acc:ZDB-GENE-041014-342]	trim54	20	() ): :
ENSDARG00000060001	5.82	5.27	6.15	5.8	5.03	6.46	64.8793	-0.0053689	0.188993	0.962879	0.987668	mettl9	768200		methyltransferase 9, His-X-His N1-histidine [Source:ZFIN	Acc:ZDB-GENE-061013-752]	mettl9	12	() ): :
ENSDARG00000043710	5.78	4.55	5.14	5.64	5.47	4.19	106.192	-0.00548002	0.182591	0.962691	0.987593	parvaa	442922		parvin, alpha a [Source:ZFIN	Acc:ZDB-GENE-040721-2]	parvaa	25	() ): :
ENSDARG00000015822	7.71	9.75	9.95	8.5	6.51	12.25	336.955	0.00592567	0.164966	0.962477	0.98742	sesn3	406840		sestrin 3 [Source:ZFIN	Acc:ZDB-GENE-040426-2924]	sesn3	15	() ): :
ENSDARG00000041493	7.9	9.03	7.99	7.6	7.84	9.13	271.115	0.00564579	0.143324	0.962384	0.987394	ipo4	553305				24	() ): :,GO:0005634(cellular_component) ): :nucleus,GO:0005737(cellular_component) ): :cytoplasm,GO:0006886(biological_process) ): :intracellular protein transport,GO:0008139(molecular_function) ): :nuclear localization sequence binding,GO:0006606(biological_process) ): :protein import into nucleus,GO:0061608(molecular_function) ): :nuclear import signal receptor activity,GO:0031267(molecular_func…
ENSDARG00000112862	1.53	2	1.02	2.06	2.05	0.13	36.5436	0.00381887	0.231726	0.962405	0.987394						KN149696.2	() ): :
ENSDARG00000017246	0.36	2.34	0.09	0.93	0.5	1.35	92.5469	0.00265012	0.239941	0.962268	0.98739	prx	571950				18	() ): :
ENSDARG00000021697	0.9	1.13	1.03	1.31	0.92	0.7	12.4462	0.00393495	0.229884	0.96231	0.98739	morn3	550359		MORN repeat containing 3 [Source:ZFIN	Acc:ZDB-GENE-050417-152]	morn3	10	() ): :
ENSDARG00000002196	2.38	3.05	2.17	2.37	2.03	3.12	153.306	0.00603596	0.175863	0.962181	0.987382	bach1b	553688		BTB and CNC homology 1, basic leucine zipper transcription factor 1 b [Source:ZFIN	Acc:ZDB-GENE-050522-220]	bach1b	10	() ): :
ENSDARG00000038302	13.34	9.61	10.65	11.66	9.92	11.93	305.555	-0.00526474	0.150564	0.962138	0.987382	ccar2	564155				10	() ): :,GO:0006355(biological_process) ): :regulation of DNA-templated transcription,GO:0005737(cellular_component) ): :cytoplasm,GO:0005634(cellular_component) ): :nucleus
ENSDARG00000061778	24.9	24.64	24.76	21.8	21.57	30.31	1251.68	0.00524498	0.120556	0.96217	0.987382	fmn2b	566432				12	() ): :,GO:0005634(cellular_component) ): :nucleus,GO:0005737(cellular_component) ): :cytoplasm,GO:0005789(cellular_component) ): :endoplasmic reticulum membrane,GO:0008017(molecular_function) ): :microtubule binding,GO:0045010(biological_process) ): :actin nucleation,GO:0005884(cellular_component) ): :actin filament,GO:0046907(biological_process) ): :intracellular transport
ENSDARG00000061806	4	3.73	4.41	4.99	2.01	5.06	43.9342	0.00522393	0.212933	0.962179	0.987382						5	() ): :
ENSDARG00000103119	0.15	0.09	0.19	0.04	0.3	0.04	4.34125	0.00233047	0.240159	0.962211	0.987382						4	() ): :
ENSDARG00000018956	6.99	6.45	6.11	7.24	6.04	5.84	112.08	0.0061593	0.175816	0.961921	0.987319	tmem39b	334110		transmembrane protein 39B [Source:ZFIN	Acc:ZDB-GENE-030131-6042]	tmem39b	13	() ): :
ENSDARG00000079585	7.16	4.78	5.63	4.97	6.62	5.53	177.904	0.00616258	0.174003	0.961724	0.987168	pkn3	323182				5	GO:0005634(cellular_component) ): :nucleus,GO:0016740(molecular_function) ): :transferase activity,GO:0005737(cellular_component) ): :cytoplasm,GO:0007165(biological_process) ): :signal transduction,GO:0004672(molecular_function) ): :protein kinase activity,GO:0004674(molecular_function) ): :protein serine/threonine kinase activity,GO:0005524(molecular_function) ): :ATP binding,GO:0000166(molecul…
ENSDARG00000088329	0.39	1.26	0.96	1.14	0.37	1.04	6.09843	0.00287934	0.237634	0.961728	0.987168	si:ch211-132e22.4	101885497				13	() ): :
ENSDARG00000111614	15.75	10.24	12.73	10.62	13.43	13.66	77.2317	0.00559887	0.191061	0.961653	0.987168						22	() ): :
ENSDARG00000010531	4.5	6.5	5.54	4.9	6.52	4.69	180.771	0.00616652	0.177604	0.961529	0.987104	scamp4	562881		secretory carrier membrane protein 4 [Source:ZFIN	Acc:ZDB-GENE-050913-40]	scamp4	22	() ): :
ENSDARG00000076324	18.14	19.96	19.52	19.6	16.83	20.97	1743.42	-0.00449511	0.106651	0.961524	0.987104	lmtk2	564666		lemur tyrosine kinase 2 [Source:ZFIN	Acc:ZDB-GENE-100812-11]	lmtk2	3	() ): :
ENSDARG00000014572	6.89	6.55	7.7	6.78	6.55	7.74	174.712	-0.00560159	0.152352	0.961275	0.98708	chpt1	322605		choline phosphotransferase 1 [Source:NCBI gene (formerly Entrezgene)	Acc:322605]	chpt1	4	() ): :
ENSDARG00000017316	31.73	28.39	33.14	28.83	28.26	35	616.742	0.00514683	0.117706	0.961285	0.98708	bag5	569580		BCL2 associated athanogene 5 [Source:ZFIN	Acc:ZDB-GENE-050913-58]	bag5	13	() ): :
ENSDARG00000040487	2.53	2.4	3.34	4.04	2.27	1.93	52.3691	-0.00516428	0.210349	0.961338	0.98708	zgc:113176	554708		zgc:113176 [Source:ZFIN	Acc:ZDB-GENE-050327-60]	zgc:113176	17	() ): :
ENSDARG00000070607	6	6.14	6.52	6.71	7.15	4.51	129.184	-0.00558043	0.183098	0.9614	0.98708	mrpl36	100093703		mitochondrial ribosomal protein L36 [Source:ZFIN	Acc:ZDB-GENE-060503-821]	mrpl36	19	() ): :
ENSDARG00000116806	0.03	0.24	0.03	0.07	0.12	0.12	5.45502	0.00253201	0.239473	0.961414	0.98708	ppp1r27a	100332066				3	() ): :
ENSDARG00000042656	0.39	0.12	0.2	0.42	0.11	0.22	4.05635	-0.00223063	0.239696	0.960991	0.986912	nrn1b	449839		neuritin 1b [Source:ZFIN	Acc:ZDB-GENE-041010-98]	nrn1b	2	() ): :
ENSDARG00000093753	0.91	0.25	1.5	1.4	0.66	0.46	6.00779	0.00278823	0.238404	0.961022	0.986912						8	() ): :
ENSDARG00000095332	7.89	7.85	9.1	6.4	8.3	9.78	185.296	0.00616389	0.161878	0.960918	0.986899	si:dkey-14d8.1	558690				4	() ): :,GO:0046872(molecular_function) ): :metal ion binding,GO:0000977(molecular_function) ): :RNA polymerase II transcription regulatory region sequence-specific DNA binding,GO:0006357(biological_process) ): :regulation of transcription by RNA polymerase II,GO:0000981(molecular_function) ): :DNA-binding transcription factor activity, RNA polymerase II-specific
ENSDARG00000056600	9.65	6.79	7.32	6.92	8.25	8.1	204.435	0.00621991	0.164684	0.960731	0.986772	papss2b	80939		3'-phosphoadenosine 5'-phosphosulfate synthase 2b [Source:ZFIN	Acc:ZDB-GENE-010323-5]	papss2b	12	() ): :
ENSDARG00000099967	0.76	1.86	1.69	2.9	0.27	1.42	23.4233	-0.00313308	0.233462	0.960749	0.986772						23	() ): :
ENSDARG00000101622	24.14	24.1	27.8	20.88	33.19	19.23	213.311	0.00593879	0.180732	0.960537	0.986648	mrps7	619204		mitochondrial ribosomal protein S7 [Source:NCBI gene (formerly Entrezgene)	Acc:619204]	mrps7	3	() ): :
ENSDARG00000097985	1.53	1.56	2.9	1.52	2.08	2.46	11.558	-0.00359405	0.230901	0.960465	0.986621						17	() ): :
ENSDARG00000113768	13.43	10.37	10.37	10.82	10.54	12.81	178.686	-0.0058178	0.161671	0.960367	0.986567	LOC101885783	101885783				KZ116019.1	() ): :
ENSDARG00000104824	47.55	40.24	46.54	36.28	44.4	53.54	173.253	-0.00583949	0.161836	0.960265	0.986509						1	() ): :
ENSDARG00000039754	4.63	5.42	7.41	4.16	4.99	8.46	147.729	-0.00575518	0.188271	0.960069	0.986355	xpc	541386		xeroderma pigmentosum, complementation group C [Source:ZFIN	Acc:ZDB-GENE-030131-8461]	xpc	8	() ): :
ENSDARG00000039851	19.29	17.58	22.52	20.78	16.8	20.87	204.668	0.00619516	0.152906	0.960004	0.986355	dhdds	406468		dehydrodolichyl diphosphate synthase [Source:ZFIN	Acc:ZDB-GENE-040426-2236]	dhdds	16	() ): :
ENSDARG00000046024	5.92	4.61	5.15	6.74	4.38	4.13	57.1008	0.00596764	0.202314	0.960023	0.986355	pym1	393566		PYM homolog 1, exon junction complex associated factor [Source:ZFIN	Acc:ZDB-GENE-040426-1464]	pym1	8	() ): :
ENSDARG00000029612	16.68	16.38	18.82	14.58	15.8	21.56	324.625	-0.00571577	0.144337	0.959914	0.986336	gpkow	368735		G patch domain and KOW motifs [Source:ZFIN	Acc:ZDB-GENE-030616-159]	gpkow	8	() ): :
ENSDARG00000091280	3.36	0	2.74	1.68	2.59	1.82	12.0221	-0.00263768	0.237635	0.959889	0.986336	si:ch211-66k16.27	100536808				2	() ): :,GO:0006954(biological_process) ): :inflammatory response,GO:0042981(biological_process) ): :regulation of apoptotic process,GO:0045087(biological_process) ): :innate immune response
ENSDARG00000056950	0.45	0.47	0.69	0.54	0.25	0.79	19.9933	0.00455413	0.226347	0.959755	0.986267	epyc	550602		epiphycan [Source:ZFIN	Acc:ZDB-GENE-041008-9]	epyc	4	() ): :
ENSDARG00000063446	11.34	12.54	12.94	12.96	11.94	11.06	145.083	0.00642654	0.165026	0.95969	0.986267	iba57	100330979		iron-sulfur cluster assembly factor IBA57 [Source:NCBI gene (formerly Entrezgene)	Acc:100330979]	iba57	2	() ): :
ENSDARG00000070055	4.47	5.42	6.26	5.86	5.87	4.22	74.2958	-0.00573593	0.194221	0.959598	0.986267	arfip1	100003895		ADP-ribosylation factor interacting protein 1 (arfaptin 1) [Source:ZFIN	Acc:ZDB-GENE-040426-2690]	arfip1	1	() ): :
ENSDARG00000092376	36.65	37.98	35.83	34.05	28.08	49.26	587.148	-0.00573746	0.148753	0.95973	0.986267	LOC796210	796210				20	() ): :
ENSDARG00000102334	11.15	8.58	9.69	10.87	6.39	11.9	163.242	0.00642492	0.179114	0.959647	0.986267				SH3 domain containing ring finger 3 [Source:HGNC Symbol	Acc:HGNC:24699]	SH3RF3	9	() ): :
ENSDARG00000078066	70.08	58.92	60.98	57.64	57.15	73	574.723	0.0056827	0.128528	0.959465	0.986265	elk1	567895		ETS transcription factor ELK1 [Source:HGNC Symbol	Acc:HGNC:3321]	ELK1	8	() ): :
ENSDARG00000079519	0.75	0.4	1.19	0.93	0.53	0.98	3.94496	-0.00241968	0.239293	0.959526	0.986265						13	() ): :
ENSDARG00000102600	1.12	0.36	0.12	0.79	0.68	0	5.82171	0.00244752	0.240383	0.959463	0.986265	LOC108182686	108182686				KN149847.1	() ): :
ENSDARG00000117163	5.37	5.19	4.6	7.31	3.81	3.61	46.191	0.00567654	0.211541	0.95948	0.986265						4	() ): :
ENSDARG00000095571	1.23	1.73	1.48	2.03	0.95	1.61	6.90706	-0.00306257	0.235676	0.959342	0.986265						4	() ): :
ENSDARG00000075340	18.89	17.68	20.04	15.32	18.28	22.29	952.042	0.00568497	0.12546	0.959211	0.986221	med1	571519		mediator complex subunit 1 [Source:HGNC Symbol	Acc:HGNC:9234]	MED1	12	() ): :
ENSDARG00000078068	1.71	1.39	2.48	2.68	1.48	1.2	48.002	0.00561856	0.214117	0.959255	0.986221	abcg4b	794238		ATP-binding cassette, sub-family G (WHITE), member 4b [Source:ZFIN	Acc:ZDB-GENE-080215-10]	abcg4b	15	() ): :
ENSDARG00000008757	6.59	7.12	7.31	8.07	6.91	5.44	106.965	0.00644164	0.182579	0.959126	0.986183	entpd6	550560		ectonucleoside triphosphate diphosphohydrolase 6 [Source:ZFIN	Acc:ZDB-GENE-050417-412]	entpd6	17	() ): :
ENSDARG00000022176	54.21	56	53.39	43.41	56.72	61.16	719.466	0.00540134	0.133875	0.959077	0.98618	iglon5	550472		IgLON family member 5 [Source:ZFIN	Acc:ZDB-GENE-050417-297]	iglon5	16	() ): :
ENSDARG00000104961	0.87	0.62	1.16	1.15	0.76	0.61	13.9214	0.00435391	0.229177	0.959015	0.986162	ghrhra	541314		growth hormone releasing hormone receptor a [Source:ZFIN	Acc:ZDB-GENE-050315-2]	ghrhra	2	() ): :
ENSDARG00000025269	30.54	28.84	28.79	29.53	27.37	30.76	1231.96	-0.00476617	0.104724	0.95888	0.986071	pdcd6ip	406669		programmed cell death 6 interacting protein [Source:ZFIN	Acc:ZDB-GENE-040426-2678]	pdcd6ip	19	() ): :
ENSDARG00000069116	15.58	13.94	16.78	17.18	13.23	15.89	99.1918	-0.00608363	0.176587	0.958866	0.986071	timm10	436951		translocase of inner mitochondrial membrane 10 homolog (yeast) [Source:ZFIN	Acc:ZDB-GENE-040718-427]	timm10	1	() ): :
ENSDARG00000002642	14.01	10.38	12.88	14.09	12.05	10.13	204.109	0.00684582	0.168465	0.958704	0.985984	sh3gl1b	378838		SH3-domain GRB2-like 1b [Source:ZFIN	Acc:ZDB-GENE-031001-6]	sh3gl1b	8	() ): :
ENSDARG00000090847	0	11.65	0	0	6.44	3.89	140.132	0.00130652	0.244157	0.958705	0.985984	si:ch211-209l18.4	100149940				22	GO:0016020(cellular_component) ): :membrane,GO:0005886(cellular_component) ): :plasma membrane
ENSDARG00000109327	1.62	1.59	0.92	2.1	1.08	0.98	19.2679	-0.00418023	0.226858	0.95862	0.985984	znf1140	103910465		zinc finger protein 1140 [Source:ZFIN	Acc:ZDB-GENE-080218-12]	znf1140	4	() ): :
ENSDARG00000034693	7.25	6.25	8.61	7.32	6.63	8.08	287.75	-0.00589364	0.143887	0.958441	0.985912	mysm1	561225		Myb-like, SWIRM and MPN domains 1 [Source:ZFIN	Acc:ZDB-GENE-041014-28]	mysm1	20	() ): :
ENSDARG00000035556	1.94	1.98	2.46	2.36	2.15	1.81	78.2513	-0.00602329	0.188395	0.958498	0.985912	rps6ka3a	338219		ribosomal protein S6 kinase a, polypeptide 3a [Source:ZFIN	Acc:ZDB-GENE-030219-119]	rps6ka3a	5	() ): :
ENSDARG00000041375	0.43	0.92	0.59	0.67	0.61	0.71	5.69006	-0.00291956	0.237041	0.958381	0.985912	si:ch211-57i17.5	565103				20	GO:0016020(cellular_component) ): :membrane
ENSDARG00000071468	9.78	8.57	14.82	12.58	12.45	7.64	54.9719	-0.00547192	0.20753	0.958482	0.985912	mrpl54	100034614		mitochondrial ribosomal protein L54 [Source:ZFIN	Acc:ZDB-GENE-050208-381]	mrpl54	22	() ): :
ENSDARG00000089646	13.35	12.74	13.29	11.07	12.2	15.58	200.859	0.00644025	0.153013	0.958218	0.985812	ctdspl3	571337				11	GO:0016791(molecular_function) ): :phosphatase activity
ENSDARG00000103488	0.18	0.18	0.27	0.09	0.12	0.45	7.97385	-0.00302569	0.236368	0.958214	0.985812						7	() ): :
ENSDARG00000070801	50.73	47.37	63.09	50.36	57.69	51.05	2216.52	-0.00550447	0.125725	0.958062	0.985792	opa1	492332		OPA1 mitochondrial dynamin like GTPase [Source:ZFIN	Acc:ZDB-GENE-041114-7]	opa1	6	() ): :
ENSDARG00000071640	1.02	1.52	1.66	1.65	1.15	1.48	12.9519	-0.00403204	0.228942	0.958108	0.985792	drd1a	792634				14	GO:0071881(biological_process) ): :adenylate cyclase-inhibiting adrenergic receptor signaling pathway,GO:0004938(molecular_function) ): :alpha2-adrenergic receptor activity,GO:0016020(cellular_component) ): :membrane,GO:0005886(cellular_component) ): :plasma membrane,GO:0004930(molecular_function) ): :G protein-coupled receptor activity,GO:0007165(biological_process) ): :signal transduction,GO:00…
ENSDARG00000097902	0.42	0.81	1.31	1.34	0.59	0.42	9.48305	0.00353765	0.235536	0.95804	0.985792	si:ch73-204p21.2	100148757				17	() ): :,GO:0016020(cellular_component) ): :membrane,GO:0008150(biological_process) ): :biological_process,GO:0003674(molecular_function) ): :molecular_function
ENSDARG00000068193	0.13	0.5	0.43	0.5	0.32	0.18	4.81062	0.00287579	0.238888	0.95794	0.98576	tmem44	751636		transmembrane protein 44 [Source:ZFIN	Acc:ZDB-GENE-060825-65]	tmem44	11	() ): :
ENSDARG00000089924	23.94	22.53	18.14	23.79	22.25	16.97	384.996	0.0067371	0.164246	0.957501	0.985355	aldh2.1	393462		aldehyde dehydrogenase 2 family member, tandem duplicate 1 [Source:ZFIN	Acc:ZDB-GENE-040426-1262]	aldh2.1	5	() ): :
ENSDARG00000094116	1.63	4.24	1.83	1.49	1.49	5.24	6.13486	-0.00279186	0.237963	0.957467	0.985355						3	() ): :
ENSDARG00000100597	10.02	4.43	4.38	6.94	5.13	7.65	10.7088	-0.00366594	0.232606	0.957324	0.985267	ubxn4	406314		UBX domain protein 4 [Source:ZFIN	Acc:ZDB-GENE-040426-1981]	ubxn4	9	() ): :
ENSDARG00000012446	0.35	0.15	0.21	0.14	0.13	0.48	7.50827	-0.00312587	0.236603	0.957214	0.985201	helz2c	552926		helicase with zinc finger 2c [Source:ZFIN	Acc:ZDB-GENE-050508-3]	helz2c	7	() ): :
ENSDARG00000060410	1.65	1.67	1.61	1.53	1.65	1.62	72.759	0.00672882	0.185521	0.957206	0.985201	thbs2a	100535241				13	GO:0005576(cellular_component) ): :extracellular region,GO:0005509(molecular_function) ): :calcium ion binding,GO:0007155(biological_process) ): :cell adhesion,GO:0062023(cellular_component) ): :collagen-containing extracellular matrix,GO:0016525(biological_process) ): :negative regulation of angiogenesis,GO:0008201(molecular_function) ): :heparin binding,GO:0048856(biological_process) ): :anatom…
ENSDARG00000034522	101.53	100.25	114.48	118.97	102.49	90.99	3133.36	-0.00568471	0.128232	0.956999	0.985168	rab6ba	558900		RAB6B, member RAS oncogene family a [Source:ZFIN	Acc:ZDB-GENE-050809-136]	rab6ba	6	() ): :
ENSDARG00000053481	0.4	0.8	0.65	0.63	0.5	0.67	21.32	0.00522075	0.222568	0.957069	0.985168	entpd5a	556849		ectonucleoside triphosphate diphosphohydrolase 5 (inactive) [Source:HGNC Symbol	Acc:HGNC:3367]	ENTPD5	17	GO:0016787(molecular_function) ): :hydrolase activity,GO:0005524(molecular_function) ): :ATP binding,GO:0000166(molecular_function) ): :nucleotide binding,GO:0016020(cellular_component) ): :membrane,GO:0005576(cellular_component) ): :extracellular region,GO:0004382(molecular_function) ): :GDP phosphatase activity,GO:0045134(molecular_function) ): :UDP phosphatase activity,GO:0030282(biological_pr…
ENSDARG00000077037	11.81	9.93	11.22	9.34	11.31	11.71	346.879	0.00638783	0.140113	0.957002	0.985168	txlna	324180		taxilin alpha [Source:ZFIN	Acc:ZDB-GENE-030131-2900]	txlna	19	() ): :
ENSDARG00000104448	1.45	0.36	0.85	0.53	0.96	1.24	9.79856	-0.00341392	0.234534	0.95709	0.985168	lrr1	404617		leucine rich repeat protein 1 [Source:ZFIN	Acc:ZDB-GENE-040426-2337]	lrr1	17	() ): :
ENSDARG00000109517	24.14	30.53	24.66	19.18	37.23	22.32	23.1383	-0.00482438	0.222454	0.956952	0.985168				Metazoan signal recognition particle RNA [Source:RFAM	Acc:RF00017]	Metazoa_SRP	11	GO:0006617(biological_process) ): :SRP-dependent cotranslational protein targeting to membrane, signal sequence recognition,GO:0005786(cellular_component) ): :signal recognition particle, endoplasmic reticulum targeting
ENSDARG00000069977	19.54	22.11	20.35	18.04	20.29	23.58	244.942	-0.00622071	0.147745	0.956837	0.985141	myg1	664752		myg1 exonuclease [Source:ZFIN	Acc:ZDB-GENE-060312-32]	myg1	11	() ): :
ENSDARG00000062003	9.57	10.69	10.07	11.41	6.99	11.6	392.295	0.00678181	0.157158	0.956606	0.984951	myo5b	567402		myosin VB [Source:ZFIN	Acc:ZDB-GENE-031219-7]	myo5b	21	() ): :
ENSDARG00000045909	26.84	16.08	16.62	23.78	14.01	22.37	69.979	-0.0059529	0.202327	0.956514	0.984903	dynlt1b	565740		dynein light chain Tctex-type 1b [Source:ZFIN	Acc:ZDB-GENE-041210-9]	dynlt1b	4	() ): :
ENSDARG00000002549	15.73	17.82	22.2	17.74	18.04	18.73	287.567	0.00663824	0.147584	0.956391	0.984888	eif3eb	561049		eukaryotic translation initiation factor 3, subunit E, b [Source:ZFIN	Acc:ZDB-GENE-050208-283]	eif3eb	19	() ): :
ENSDARG00000034215	54.38	47.57	54.58	48.24	49.3	58.39	476.413	-0.00575919	0.123422	0.956425	0.984888	rab42a	406315		RAB42, member RAS oncogene family a [Source:ZFIN	Acc:ZDB-GENE-040426-1983]	rab42a	19	() ): :
ENSDARG00000057728	0.74	0.79	0.62	0.78	0.43	0.9	11.6111	0.00427253	0.230703	0.956454	0.984888	slc17a8	563467		solute carrier family 17 member 8 [Source:ZFIN	Acc:ZDB-GENE-060503-416]	slc17a8	18	() ): :
ENSDARG00000006585	13.69	14.6	12.54	10.43	12.65	17.4	321.572	0.00686904	0.157737	0.956128	0.984837	zmp:0000000529	571996		DM1 locus, WD repeat containing [Source:HGNC Symbol	Acc:HGNC:2936]	DMWD	15	() ): :
ENSDARG00000026986	5.56	5.61	6.47	5.66	5.31	6.4	241.748	0.00653029	0.141686	0.956213	0.984837	rexo1	564551		REX1, RNA exonuclease 1 homolog [Source:ZFIN	Acc:ZDB-GENE-030131-1650]	rexo1	8	() ): :
ENSDARG00000079366	47.39	43.4	37.42	40.66	35.93	52.19	1877.81	-0.00614555	0.132057	0.956226	0.984837	ppp1r9ba	558232		protein phosphatase 1 regulatory subunit 9B [Source:HGNC Symbol	Acc:HGNC:9298]	PPP1R9B	3	GO:0005737(cellular_component) ): :cytoplasm,GO:0005856(cellular_component) ): :cytoskeleton,GO:0051015(molecular_function) ): :actin filament binding,GO:0030425(cellular_component) ): :dendrite,GO:0007015(biological_process) ): :actin filament organization,GO:0015629(cellular_component) ): :actin cytoskeleton,GO:0014069(cellular_component) ): :postsynaptic density,GO:0031175(biological_process) …
ENSDARG00000093170	0.96	2.18	1.48	2.32	1.06	1.24	20.8189	-0.00444934	0.22679	0.956268	0.984837	mef2b	558073		myocyte enhancer factor 2b [Source:ZFIN	Acc:ZDB-GENE-050208-357]	mef2b	22	() ): :
ENSDARG00000099841	66.96	67.75	64.25	58.22	61.43	79.32	1459.82	-0.00533824	0.116905	0.956221	0.984837	prkcab	100333967		protein kinase C alpha [Source:HGNC Symbol	Acc:HGNC:9393]	PRKCA	3	() ): :
ENSDARG00000042900	2.35	2.13	2.77	1.66	2.72	2.68	75.366	0.00678913	0.193312	0.955997	0.984808	gtpbp1l	402863		GTP binding protein 1, like [Source:ZFIN	Acc:ZDB-GENE-041007-2]	gtpbp1l	22	GO:0003924(molecular_function) ): :GTPase activity,GO:0005525(molecular_function) ): :GTP binding,GO:0000166(molecular_function) ): :nucleotide binding,GO:0003746(molecular_function) ): :translation elongation factor activity,GO:0006414(biological_process) ): :translational elongation
ENSDARG00000059900	51.4	45.94	49.82	49.98	43.86	52.58	2002.47	-0.00488475	0.101088	0.956012	0.984808	tbc1d9	563578		TBC1 domain family member 9 [Source:HGNC Symbol	Acc:HGNC:21710]	TBC1D9	1	GO:0005509(molecular_function) ): :calcium ion binding,GO:0005096(molecular_function) ): :GTPase activator activity
ENSDARG00000001470	12.11	11.82	14.92	10.02	16.53	11.86	150.469	-0.00677321	0.181186	0.955838	0.984723	mhc1zea	565708		major histocompatibility complex class I ZEA [Source:ZFIN	Acc:ZDB-GENE-070705-176]	mhc1zea	1	() ): :
ENSDARG00000028542	55.3	58.87	69.93	57.03	56.48	67.87	1364.16	0.00560071	0.111823	0.955829	0.984723	si:ch211-114c12.2	336578		si:ch211-114c12.2 [Source:ZFIN	Acc:ZDB-GENE-030131-8522]	si:ch211-114c12.2	5	() ): :
ENSDARG00000058212	7.07	5.1	7.58	6.12	7.3	6.16	76.8403	-0.00639836	0.190302	0.955776	0.984723	ndnl2	386658		necdin-like 2 [Source:ZFIN	Acc:ZDB-GENE-031107-3]	ndnl2	23	() ): :
ENSDARG00000086218	1.19	0.78	1.17	1.61	0.51	1.15	14.7804	-0.00416528	0.229767	0.955668	0.984689	nkd3	566577		NKD inhibitor of WNT signaling pathway 3 [Source:ZFIN	Acc:ZDB-GENE-060503-63]	nkd3	19	() ): :
ENSDARG00000101745	89.9	110.89	151.18	144.03	94.4	104.63	306.676	0.00706292	0.173043	0.95554	0.984603						6	() ): :
ENSDARG00000098233	1.67	1.38	2.34	1.79	1.64	2	22.1336	-0.00514726	0.220104	0.955445	0.984552						20	() ): :
ENSDARG00000008790	25.92	33.44	26.93	23.24	29.15	32.56	320.055	0.0069555	0.15521	0.955218	0.984544	actr3b	100038776		actin related protein 3B [Source:ZFIN	Acc:ZDB-GENE-070424-10]	actr3b	24	() ): :
ENSDARG00000015033	0.2	0.34	0.36	0.1	0.37	0.48	6.58716	-0.00312267	0.237097	0.955288	0.984544	slc23a1	559435		solute carrier family 23 member 1 [Source:ZFIN	Acc:ZDB-GENE-080804-2]	slc23a1	21	() ): :,GO:0016020(cellular_component) ): :membrane,GO:0055085(biological_process) ): :transmembrane transport,GO:0022857(molecular_function) ): :transmembrane transporter activity,GO:0071702(biological_process) ): :organic substance transport
ENSDARG00000035700	10.11	8.72	9.44	7.62	10.48	10.04	94.7363	-0.00658123	0.181364	0.955391	0.984544	zgc:101664	450064		zgc:101664 [Source:ZFIN	Acc:ZDB-GENE-041010-187]	zgc:101664	8	() ): :
ENSDARG00000053496	10.09	9.11	9.1	8.09	11.05	8.89	83.4438	-0.00650601	0.187114	0.955361	0.984544	gemin8	100000842		gem (nuclear organelle) associated protein 8 [Source:ZFIN	Acc:ZDB-GENE-041114-189]	gemin8	1	() ): :
ENSDARG00000102505	26.31	25.01	24.6	23.8	22.06	29.26	581.001	0.00611528	0.123617	0.955359	0.984544	trim32	562764		tripartite motif containing 32 [Source:ZFIN	Acc:ZDB-GENE-060428-1]	trim32	KN149782.1	GO:0046872(molecular_function) ): :metal ion binding,GO:0008270(molecular_function) ): :zinc ion binding,GO:0061630(molecular_function) ): :ubiquitin protein ligase activity,GO:0032402(biological_process) ): :melanosome transport,GO:0070121(biological_process) ): :Kupffer's vesicle development,GO:0007369(biological_process) ): :gastrulation,GO:0039023(biological_process) ): :pronephric duct morph…
ENSDARG00000113012	7.91	1.64	0.71	0.97	2.87	6.08	4.02164	0.0025454	0.240744	0.955391	0.984544						KN149840.1	() ): :
ENSDARG00000100292	0.95	0.96	0.77	1.6	0.37	0.89	7.7458	-0.00330846	0.236047	0.955067	0.984491	fam166b	100009651		ciliary microtubule inner protein 2B [Source:NCBI gene (formerly Entrezgene)	Acc:100009651]	cimip2b	10	() ): :
ENSDARG00000061553	2.73	2.48	3.67	3.99	2.04	2.86	105.867	-0.00641813	0.193166	0.954986	0.984455	pgap4	768199		post-GPI attachment to proteins GalNAc transferase 4 [Source:ZFIN	Acc:ZDB-GENE-061013-692]	pgap4	11	() ): :
ENSDARG00000112870	24.49	23.68	24	31.85	19.12	20.77	96.4093	-0.00651742	0.188983	0.954958	0.984455	LOC110437957	110437957				2	() ): :
ENSDARG00000009020	24.35	35.99	32.98	45.4	19.15	28.95	589.111	-0.00760391	0.184584	0.954541	0.984299	cnr1	404209		cannabinoid receptor 1 [Source:ZFIN	Acc:ZDB-GENE-040312-3]	cnr1	20	() ): :
ENSDARG00000052016	1.24	0.28	0.67	0.42	0.83	0.92	4.8103	-0.00287148	0.238811	0.954513	0.984299	cabp2a	572226		calcium binding protein 2a [Source:ZFIN	Acc:ZDB-GENE-050913-25]	cabp2a	1	() ): :
ENSDARG00000057273	2.22	1.77	2.65	2.78	2.61	1.22	28.6435	-0.00510513	0.221274	0.954744	0.984299	alox5a	567204		arachidonate 5-lipoxygenase a [Source:ZFIN	Acc:ZDB-GENE-090311-47]	alox5a	13	() ): :
ENSDARG00000062712	4.18	3.83	6.42	4.76	3.59	5.81	38.1605	0.00637043	0.210544	0.954614	0.984299	tmem264	798655		transmembrane protein 264 [Source:ZFIN	Acc:ZDB-GENE-060503-911]	tmem264	22	() ): :
ENSDARG00000101297	38.13	31.51	44.35	31.94	28.97	52.03	919.548	0.00409438	0.15515	0.954628	0.984299	tmem266	791190		transmembrane protein 266 [Source:ZFIN	Acc:ZDB-GENE-070112-2382]	tmem266	25	() ): :
ENSDARG00000101584	49.75	59.26	63.24	67.06	53.49	50.08	765.926	-0.00645463	0.144194	0.95472	0.984299				si:ch211-132d3.4 [Source:NCBI gene (formerly Entrezgene)	Acc:323155]	si:ch211-132d3.4	7	GO:0035195(biological_process) ): :miRNA-mediated gene silencing,GO:0016442(cellular_component) ): :RISC complex
ENSDARG00000111072	21.85	19.2	14.79	1.33	24.67	27.87	15.9368	0.00402366	0.234682	0.954728	0.984299				Metazoan signal recognition particle RNA [Source:RFAM	Acc:RF00017]	Metazoa_SRP	11	GO:0006617(biological_process) ): :SRP-dependent cotranslational protein targeting to membrane, signal sequence recognition,GO:0005786(cellular_component) ): :signal recognition particle, endoplasmic reticulum targeting
ENSDARG00000055737	32.78	33.1	38.74	36.24	31.75	35.9	1190.25	-0.00547474	0.109595	0.954386	0.984259	ube3a	792398		ubiquitin protein ligase E3A [Source:ZFIN	Acc:ZDB-GENE-041114-190]	ube3a	6	() ): :
ENSDARG00000103343	0.53	0.4	0.62	0.44	0.46	0.51	4.55069	0.00326255	0.238235	0.954218	0.984133						4	() ): :
ENSDARG00000103265	0.24	0.19	0.23	0.09	0.08	0.49	6.66859	0.00333662	0.238112	0.954137	0.984096						4	() ): :
ENSDARG00000111188	9.88	6.95	6.6	4.39	10.86	7.41	169.649	0.00698902	0.198814	0.954099	0.984096	cdaa	559958		cytidine deaminase a [Source:ZFIN	Acc:ZDB-GENE-170609-2]	cdaa	23	() ): :
ENSDARG00000061024	5.37	5.56	4.6	3.71	5.92	5.57	141.319	0.00726094	0.179501	0.954025	0.984075	rabggta	767725		Rab geranylgeranyltransferase subunit alpha [Source:ZFIN	Acc:ZDB-GENE-060929-1042]	rabggta	23	() ): :
ENSDARG00000089172	4.89	3.38	2.99	4.26	3.59	3.47	26.7896	-0.00511405	0.217792	0.953946	0.98404	si:ch1073-391i24.1	101886250				2	() ): :
ENSDARG00000038439	9.06	26.65	1.56	1.06	31.7	0.56	26.7865	0.00225067	0.24235	0.95365	0.983781	fabp10a	171481		fatty acid binding protein 10a, liver basic [Source:ZFIN	Acc:ZDB-GENE-020318-1]	fabp10a	16	() ): :
ENSDARG00000061549	2.73	3.08	3.64	3.78	2.49	2.97	59.4789	0.00708819	0.197601	0.953493	0.983667	foxo1b	567969		forkhead box O1 b [Source:ZFIN	Acc:ZDB-GENE-080425-3]	foxo1b	10	() ): :
ENSDARG00000044628	15.84	16.46	20.31	19.18	15.78	17.44	194.632	-0.00682374	0.15649	0.953439	0.983662	dtd1	445046		D-aminoacyl-tRNA deacylase 1 [Source:ZFIN	Acc:ZDB-GENE-040801-175]	dtd1	6	() ): :
ENSDARG00000090387	19.82	22.09	17.53	15.87	18.1	25.99	243.07	-0.0068978	0.164982	0.953443	0.983662	onecut2	100000073		one cut homeobox 2 [Source:HGNC Symbol	Acc:HGNC:8139]	ONECUT2	21	() ): :
ENSDARG00000069499	1.06	0.57	0.75	0.59	0.89	0.94	12.6249	-0.00443075	0.22981	0.953235	0.983541	spag1b	768178		sperm associated antigen 1b [Source:ZFIN	Acc:ZDB-GENE-061013-512]	spag1b	16	() ): :
ENSDARG00000089345	2.55	3.53	3.02	1.94	3.65	3.59	14.615	-0.00467545	0.227911	0.953063	0.983411	LOC799968	799968				1	() ): :
ENSDARG00000006775	3.19	1.94	3.38	1.72	3.9	2.82	84.2585	-0.00633875	0.205328	0.952773	0.983235	cass4	100000938				11	GO:0005737(cellular_component) ): :cytoplasm,GO:0007169(biological_process) ): :transmembrane receptor protein tyrosine kinase signaling pathway,GO:0016477(biological_process) ): :cell migration,GO:0005886(cellular_component) ): :plasma membrane,GO:0007155(biological_process) ): :cell adhesion,GO:0005925(cellular_component) ): :focal adhesion,GO:0070161(cellular_component) ): :anchoring junction
ENSDARG00000007553	0.44	0.38	0.59	0.41	0.25	0.82	14.986	-0.00448265	0.229519	0.952847	0.983235	opn4.1	352918		opsin 4.1 [Source:ZFIN	Acc:ZDB-GENE-030314-2]	opn4.1	2	() ): :
ENSDARG00000044092	119.36	118.33	149.03	142.41	133.97	105.02	805.317	-0.00673203	0.146767	0.952802	0.983235	atp5if1b	558368		ATP synthase inhibitory factor subunit 1b [Source:NCBI gene (formerly Entrezgene)	Acc:558368]	atp5if1b	17	() ): :
ENSDARG00000052907	14.12	13.59	18.21	19.17	12.87	12.65	289.964	0.00751247	0.168046	0.952751	0.983235	bcl7a	57952		BAF chromatin remodeling complex subunit BCL7A [Source:NCBI gene (formerly Entrezgene)	Acc:57952]	bcl7a	5	() ): :
ENSDARG00000111249	0.78	0.62	0.71	0.96	0.29	0.8	4.21592	0.00316571	0.239011	0.952747	0.983235						5	() ): :
ENSDARG00000012215	1.43	1.47	2.01	2.16	1.3	1.5	25.6754	-0.00566537	0.218545	0.952591	0.983205	umps	393143		uridine monophosphate synthetase [Source:ZFIN	Acc:ZDB-GENE-040426-785]	umps	9	() ): :
ENSDARG00000093423	0.79	0.38	2.08	0.88	0.74	1.74	11.4739	-0.00378662	0.234525	0.952587	0.983205	swsap1	100329809		SWIM-type zinc finger 7 associated protein 1 [Source:ZFIN	Acc:ZDB-GENE-071116-2]	swsap1	3	() ): :
ENSDARG00000019025	1	0.46	1.14	0.66	0.65	1.35	22.8508	-0.00502152	0.225135	0.95234	0.98304	podn	100536479		podocan [Source:HGNC Symbol	Acc:HGNC:23174]	PODN	23	() ): :
ENSDARG00000028628	38.14	39.31	45.86	41.72	38.98	41.83	381.41	-0.00644377	0.130265	0.952281	0.98304	gdap1l1	562163		ganglioside induced differentiation associated protein 1 like 1 [Source:HGNC Symbol	Acc:HGNC:4213]	GDAP1L1	23	GO:0016020(cellular_component) ): :membrane
ENSDARG00000043554	22.35	20.92	21.5	23.58	21.96	17.36	148.605	0.00727795	0.171325	0.952305	0.98304	mrpl40	447873		mitochondrial ribosomal protein L40 [Source:ZFIN	Acc:ZDB-GENE-040912-37]	mrpl40	8	() ): :
ENSDARG00000012591	31.51	31.73	32.69	35.07	31.68	26.75	344.627	0.00728849	0.148901	0.952138	0.982973	pdcd10b	405869		programmed cell death 10b [Source:ZFIN	Acc:ZDB-GENE-040426-2607]	pdcd10b	2	() ): :
ENSDARG00000045900	16.63	14.48	15.23	10.72	17.92	16.73	307.83	0.00762797	0.165186	0.951761	0.982884	agbl5	445479		AGBL carboxypeptidase 5 [Source:NCBI gene (formerly Entrezgene)	Acc:445479]	agbl5	4	() ): :
ENSDARG00000059398	35.98	30.01	39.31	33.28	29.47	42.82	388.219	-0.00681592	0.142254	0.952007	0.982884	myef2	641483		myelin expression factor 2 [Source:ZFIN	Acc:ZDB-GENE-051120-114]	myef2	18	() ): :
ENSDARG00000060797	0.21	0.78	0.03	0.34	0.23	0.42	10.1427	0.00357681	0.237849	0.951842	0.982884	pfkmb	568001		phosphofructokinase, muscle b [Source:ZFIN	Acc:ZDB-GENE-081114-1]	pfkmb	6	() ): :
ENSDARG00000075217	0.26	0.19	0.23	0.16	0.19	0.31	10.0614	0.00464471	0.232055	0.951917	0.982884	tdrd12	100334979				25	() ): :
ENSDARG00000078962	0.18	0.24	0.2	0.39	0.08	0.18	4.43526	-0.00293281	0.239116	0.951742	0.982884	duox2	100330288		dual oxidase maturation factor 2 [Source:HGNC Symbol	Acc:HGNC:32698]	DUOXA2	25	() ): :
ENSDARG00000086150	7.71	9.09	8.95	7.44	7.79	10.14	163.429	0.00755364	0.161269	0.951692	0.982884	wrap53	321796		WD repeat containing, antisense to TP53 [Source:ZFIN	Acc:ZDB-GENE-030131-515]	wrap53	7	() ): :
ENSDARG00000091624	1.82	2.45	2	2.07	2.36	1.8	31.6022	-0.00602149	0.213514	0.951981	0.982884	ugt2b6	792506		UDP glucuronosyltransferase 2 family, polypeptide B6 [Source:ZFIN	Acc:ZDB-GENE-100402-4]	ugt2b6	5	() ): :
ENSDARG00000097639	0.69	1.26	1.13	0.43	1.17	1.55	13.9575	-0.00439619	0.230943	0.951897	0.982884						25	() ): :
ENSDARG00000117324	1.84	4.32	4.83	4.17	3.28	3.19	107.589	0.00712189	0.20345	0.951852	0.982884						22	() ): :
ENSDARG00000005894	0.22	0.52	0.86	0.24	0.38	0.98	7.14809	0.0036767	0.237227	0.951423	0.982826	slc7a9	567117		solute carrier family 7 member 9 [Source:HGNC Symbol	Acc:HGNC:11067]	SLC7A9	7	() ): :,GO:0016020(cellular_component) ): :membrane,GO:0055085(biological_process) ): :transmembrane transport,GO:0022857(molecular_function) ): :transmembrane transporter activity,GO:0048793(biological_process) ): :pronephros development,GO:0003333(biological_process) ): :amino acid transmembrane transport,GO:0015179(molecular_function) ): :L-amino acid transmembrane transporter activity,GO:1902…
ENSDARG00000042659	1.14	1.22	0.76	0.78	1.17	1.24	9.46652	-0.0041716	0.232831	0.951506	0.982826	thyn1	393630		thymocyte nuclear protein 1 [Source:ZFIN	Acc:ZDB-GENE-040426-1585]	thyn1	15	() ): :
ENSDARG00000091723	2.78	1.99	2.91	1.21	3.63	2.46	45.4411	0.00683412	0.216438	0.951542	0.982826	si:ch211-202f3.4	560088				17	GO:0016787(molecular_function) ): :hydrolase activity,GO:0006508(biological_process) ): :proteolysis,GO:0005737(cellular_component) ): :cytoplasm,GO:0008233(molecular_function) ): :peptidase activity,GO:0004198(molecular_function) ): :calcium-dependent cysteine-type endopeptidase activity,GO:0008234(molecular_function) ): :cysteine-type peptidase activity
ENSDARG00000095011	10.42	17.4	14.29	19.93	11.01	11.5	34.6913	-0.00587671	0.216434	0.951541	0.982826						13	() ): :
ENSDARG00000018687	0.07	0.16	0.16	0.22	0.12	0.07	4.99539	-0.00312844	0.238473	0.95127	0.982744	itga2b	445380		integrin, alpha 2b [Source:ZFIN	Acc:ZDB-GENE-051031-1]	itga2b	3	() ): :
ENSDARG00000078606	3.98	2.35	3.48	3.48	2.9	3.1	20.4187	0.00597029	0.221954	0.951269	0.982744	zgc:194224	799070		zgc:194224 [Source:ZFIN	Acc:ZDB-GENE-081022-79]	zgc:194224	20	() ): :
ENSDARG00000100679	21.05	22.63	20.07	21.75	18.06	23.12	413.679	0.00716706	0.13484	0.951281	0.982744	lrch3	100126105		leucine rich repeats and calponin homology domain containing 3 [Source:HGNC Symbol	Acc:HGNC:28637]	LRCH3	18	() ): :,GO:0005829(cellular_component) ): :cytosol,GO:0008150(biological_process) ): :biological_process,GO:0003674(molecular_function) ): :molecular_function
ENSDARG00000076411	0.23	0.88	0.58	0.51	0.3	0.96	11.7033	-0.00399569	0.233968	0.951066	0.982663	cavin1a	557070		caveolae associated protein 1 [Source:HGNC Symbol	Acc:HGNC:9688]	CAVIN1	3	GO:0016020(cellular_component) ): :membrane,GO:0005737(cellular_component) ): :cytoplasm,GO:0006361(biological_process) ): :transcription initiation at RNA polymerase I promoter,GO:0006363(biological_process) ): :termination of RNA polymerase I transcription,GO:0005901(cellular_component) ): :caveola,GO:0008307(molecular_function) ): :structural constituent of muscle,GO:0042134(molecular_function…
ENSDARG00000003931	10.54	10.55	11.49	9.75	12.67	9.79	218.17	-0.00728149	0.160847	0.950709	0.982592	cndp2	327288		carnosine dipeptidase 2 [Source:ZFIN	Acc:ZDB-GENE-030131-5499]	cndp2	19	() ): :
ENSDARG00000009242	1.72	0.64	0.8	0.99	0.8	1.29	9.32389	0.0043283	0.234011	0.950932	0.982592	fev	791175		FEV transcription factor, ETS family member [Source:ZFIN	Acc:ZDB-GENE-070112-1852]	fev	9	() ): :
ENSDARG00000014244	84.87	93.13	111.73	95.32	86.65	102.96	1080.33	0.00652415	0.117998	0.950753	0.982592	rbmx	321860		RNA binding motif protein X-linked [Source:ZFIN	Acc:ZDB-GENE-030131-579]	rbmx	14	() ): :
ENSDARG00000016866	29.17	23.71	19.99	22.72	22.52	26.51	377.725	0.00761253	0.152629	0.950571	0.982592	fam102ab	767674		estrogen-induced osteoclastogenesis regulator 1b [Source:ZFIN	Acc:ZDB-GENE-060929-412]	eeig1b	5	() ): :
ENSDARG00000045930	4.93	4.6	3.54	2.02	6.07	4.59	75.8188	0.00681837	0.211465	0.950951	0.982592	rbpms2a	436682		RNA binding protein, mRNA processing factor 2a [Source:ZFIN	Acc:ZDB-GENE-040718-106]	rbpms2a	25	() ): :
ENSDARG00000057633	2.23	0.93	1.8	2.33	0.99	1.73	23.243	-0.00524538	0.225004	0.950643	0.982592	cxcr4a	140747		chemokine (C-X-C motif) receptor 4a [Source:ZFIN	Acc:ZDB-GENE-020102-1]	cxcr4a	6	() ): :
ENSDARG00000068082	2.65	5.37	2.84	3.12	2.32	5.11	5.23811	0.00359287	0.237869	0.950831	0.982592	wbp4	553723				6	() ): :
ENSDARG00000071872	8.05	6.55	7.57	8.02	6.96	6.58	149.725	0.00784862	0.166566	0.950507	0.982592	zdhhc15b	777734		zinc finger DHHC-type palmitoyltransferase 15b [Source:ZFIN	Acc:ZDB-GENE-061110-106]	zdhhc15b	14	() ): :
ENSDARG00000076419	4.98	3.97	8.23	4.62	5.8	6.22	57.8263	0.00719673	0.204547	0.950891	0.982592	LOC100536595	100536595				8	() ): :
ENSDARG00000076627	16.14	15.3	16.72	14.68	16.92	15.43	265.881	0.00742935	0.14432	0.950455	0.982592	smg9	562557		SMG9 nonsense mediated mRNA decay factor [Source:HGNC Symbol	Acc:HGNC:25763]	SMG9	16	() ): :,GO:0000184(biological_process) ): :nuclear-transcribed mRNA catabolic process, nonsense-mediated decay
ENSDARG00000078011	23.65	21.56	23.78	17.46	18.49	32.61	1024.48	0.0076986	0.155289	0.95049	0.982592	nav1a	100536287		neuron navigator 1 [Source:HGNC Symbol	Acc:HGNC:15989]	NAV1	23	() ): :
ENSDARG00000092154	32.71	29.63	33.45	35.93	27.34	30.75	572.665	0.0070858	0.132682	0.950486	0.982592	tex264a	402960		testis expressed 264, ER-phagy receptor a [Source:ZFIN	Acc:ZDB-GENE-040426-1885]	tex264a	6	GO:0016020(cellular_component) ): :membrane,GO:0005634(cellular_component) ): :nucleus,GO:0008150(biological_process) ): :biological_process,GO:0003674(molecular_function) ): :molecular_function,GO:0005789(cellular_component) ): :endoplasmic reticulum membrane,GO:0000421(cellular_component) ): :autophagosome membrane,GO:0061709(biological_process) ): :reticulophagy,GO:0005657(cellular_component) …
ENSDARG00000092807	73.89	69.52	81.55	77.77	65.23	78.01	184.398	0.00755183	0.152429	0.950819	0.982592				si:dkey-151g10.6 [Source:NCBI gene (formerly Entrezgene)	Acc:335588]	si:dkey-151g10.6	23	GO:0003735(molecular_function) ): :structural constituent of ribosome,GO:0006412(biological_process) ): :translation,GO:0005840(cellular_component) ): :ribosome,GO:1990904(cellular_component) ): :ribonucleoprotein complex
ENSDARG00000095717	5	5.08	4.7	2.58	4.4	7.63	137.175	0.00753866	0.197702	0.950522	0.982592						4	() ): :
ENSDARG00000100088	0.6	0.49	0.4	0.57	0.39	0.55	39.5518	-0.00642396	0.209414	0.950848	0.982592	st14	557248				15	() ): :
ENSDARG00000003326	0.92	2.14	1.03	1.82	1.12	1.22	23.8791	-0.00529065	0.224655	0.950102	0.982506	cacng5a	797409		calcium channel, voltage-dependent, gamma subunit 5a [Source:ZFIN	Acc:ZDB-GENE-120104-4]	cacng5a	6	GO:0016020(cellular_component) ): :membrane,GO:0006811(biological_process) ): :monoatomic ion transport,GO:0098839(cellular_component) ): :postsynaptic density membrane,GO:0006816(biological_process) ): :calcium ion transport,GO:0051968(biological_process) ): :positive regulation of synaptic transmission, glutamatergic,GO:0005245(molecular_function) ): :voltage-gated calcium channel activity,GO:0…
ENSDARG00000010553	25.89	23.76	27.7	29.54	24.57	21.14	234.501	0.00774834	0.160664	0.950186	0.982506	mmgt1	402891		membrane magnesium transporter 1 [Source:ZFIN	Acc:ZDB-GENE-040801-65]	mmgt1	14	() ): :
ENSDARG00000070222	30.34	47.64	45.76	63.75	25.53	30.94	768.975	0.0078964	0.192015	0.95004	0.982506	fam43b	447808		family with sequence similarity 43 member B [Source:ZFIN	Acc:ZDB-GENE-040912-11]	fam43b	23	() ): :
ENSDARG00000089799	0.47	0.3	0.94	0.23	0.53	0.86	5.4546	0.0035963	0.238155	0.950069	0.982506	si:ch73-41e3.7	572312		si:ch73-41e3.7 [Source:ZFIN	Acc:ZDB-GENE-090313-163]	si:ch73-41e3.7	1	GO:0005634(cellular_component) ): :nucleus,GO:0031048(biological_process) ): :RNA-mediated heterochromatin formation,GO:0035197(molecular_function) ): :siRNA binding
ENSDARG00000101535	2.22	3.17	2.81	3.18	1.52	3.7	62.3373	-0.00664647	0.206997	0.949973	0.982506	col10a1b	555804		collagen type X alpha 1 chain [Source:HGNC Symbol	Acc:HGNC:2185]	COL10A1	20	GO:0005576(cellular_component) ): :extracellular region,GO:0005615(cellular_component) ): :extracellular space,GO:0062023(cellular_component) ): :collagen-containing extracellular matrix,GO:0030198(biological_process) ): :extracellular matrix organization,GO:0005581(cellular_component) ): :collagen trimer,GO:0030020(molecular_function) ): :extracellular matrix structural constituent conferring te…
ENSDARG00000104384	0.32	1.13	0.25	0.57	0.29	0.88	32.0062	-0.00463845	0.229736	0.950181	0.982506	agbl1	100536841		AGBL carboxypeptidase 1 [Source:HGNC Symbol	Acc:HGNC:26504]	AGBL1	25	() ): :
ENSDARG00000093804	12.28	11.31	10.85	7.08	17.41	9.56	57.0145	-0.00648165	0.211197	0.949883	0.982475	sst6	794095		somatostatin 6 [Source:ZFIN	Acc:ZDB-GENE-081022-199]	sst6	23	() ): :
ENSDARG00000021443	8.42	8.19	9.06	8.8	9.51	7.05	254.027	-0.00740009	0.158935	0.949765	0.982399	zfp36l1b	323671		zinc finger protein 36, C3H type-like 1b [Source:ZFIN	Acc:ZDB-GENE-030131-2391]	zfp36l1b	20	() ): :
ENSDARG00000073792	14.75	14.75	18.01	16.31	15.44	14.65	415.652	0.00799014	0.136213	0.949744	0.982399	man1b1a	562592		mannosidase alpha class 1B member 1 [Source:HGNC Symbol	Acc:HGNC:6823]	MAN1B1	21	GO:0004559(molecular_function) ): :alpha-mannosidase activity,GO:0016787(molecular_function) ): :hydrolase activity,GO:0016020(cellular_component) ): :membrane,GO:0046872(molecular_function) ): :metal ion binding,GO:0005509(molecular_function) ): :calcium ion binding,GO:0005783(cellular_component) ): :endoplasmic reticulum,GO:0016798(molecular_function) ): :hydrolase activity, acting on glycosyl …
ENSDARG00000091298	0.15	0.22	0.15	0.16	0.18	0.16	5.13636	0.00376165	0.237533	0.949629	0.982399	pmela	321239		premelanosome protein a [Source:ZFIN	Acc:ZDB-GENE-030131-9818]	pmela	11	() ): :
ENSDARG00000099642	8.58	7.96	8.49	9.67	6.84	8.01	122.202	0.00790216	0.173108	0.949682	0.982399	dcun1d1	327232		DCN1, defective in cullin neddylation 1, domain containing 1 (S. cerevisiae) [Source:ZFIN	Acc:ZDB-GENE-030131-5443]	dcun1d1	2	() ): :
ENSDARG00000005251	6.53	7.73	9.71	9.25	6.06	8.85	99.3156	-0.00738369	0.186066	0.949428	0.982239	rpe	334897		ribulose-5-phosphate-3-epimerase [Source:ZFIN	Acc:ZDB-GENE-030131-6837]	rpe	9	() ): :
ENSDARG00000016173	100.18	91.17	114.62	91.44	110.66	96.63	1965.07	0.0070874	0.124339	0.949373	0.982239	cct3	192327		chaperonin containing TCP1, subunit 3 (gamma) [Source:ZFIN	Acc:ZDB-GENE-020419-5]	cct3	16	() ): :
ENSDARG00000030472	4.36	3.5	4.25	3.4	3.85	4.93	82.0651	-0.00746885	0.1845	0.949404	0.982239	slc16a5a	565514		solute carrier family 16 member 5 [Source:HGNC Symbol	Acc:HGNC:10926]	SLC16A5	12	GO:0016020(cellular_component) ): :membrane,GO:0055085(biological_process) ): :transmembrane transport,GO:0022857(molecular_function) ): :transmembrane transporter activity,GO:0008028(molecular_function) ): :monocarboxylic acid transmembrane transporter activity,GO:0015718(biological_process) ): :monocarboxylic acid transport
ENSDARG00000104297	4.2	2.47	1.27	1.44	4.13	2.44	10.8159	-0.00410573	0.234371	0.949165	0.982108	cartl	100329270		cocaine- and amphetamine-regulated transcript-like [Source:ZFIN	Acc:ZDB-GENE-141216-416]	cartl	7	() ): :
ENSDARG00000079486	0.68	0.72	0.67	0.84	0.53	0.75	11.5454	-0.00480653	0.230088	0.949035	0.982021	fam20a	564308		FAM20A golgi associated secretory pathway pseudokinase [Source:ZFIN	Acc:ZDB-GENE-081022-117]	fam20a	12	() ): :
ENSDARG00000061006	13.03	14.64	11.28	12.18	10.99	16.21	102.063	-0.0075733	0.181549	0.948968	0.981998	cyb5d2	795950		cytochrome b5 domain containing 2 [Source:ZFIN	Acc:ZDB-GENE-050506-83]	cyb5d2	5	() ): :
ENSDARG00000078378	5.57	5.32	5.7	3.72	4.55	8.07	35.7389	0.0069946	0.212802	0.948891	0.981965				TNF receptor associated factor 2 [Source:HGNC Symbol	Acc:HGNC:12032]	TRAF2	5	() ): :
ENSDARG00000055875	44.36	39.15	40.26	31.24	45.38	44.91	993.766	0.00805221	0.141289	0.948844	0.981964	pag1	100034498				19	GO:0016020(cellular_component) ): :membrane,GO:0035556(biological_process) ): :intracellular signal transduction,GO:0005886(cellular_component) ): :plasma membrane,GO:0050868(biological_process) ): :negative regulation of T cell activation,GO:0045121(cellular_component) ): :membrane raft,() ): :
ENSDARG00000057245	2.06	1.85	2.28	2.36	2.02	1.8	46.8066	-0.00708473	0.202	0.948776	0.98194	im:7138535	797998		im:7138535 [Source:ZFIN	Acc:ZDB-GENE-041111-49]	im:7138535	5	GO:0008150(biological_process) ): :biological_process,GO:0003674(molecular_function) ): :molecular_function,GO:0072669(cellular_component) ): :tRNA-splicing ligase complex
ENSDARG00000004785	28.2	27.66	29.63	28.82	31.53	24.09	500.098	-0.00561985	0.144507	0.948641	0.981881	cops2	415145		COP9 signalosome subunit 2 [Source:ZFIN	Acc:ZDB-GENE-040625-15]	cops2	25	() ): :
ENSDARG00000006040	7.82	6.84	8.89	7.89	7.28	8.37	127.032	-0.00775168	0.166246	0.947981	0.981881	cyp20a1	406641		cytochrome P450, family 20, subfamily A, polypeptide 1 [Source:ZFIN	Acc:ZDB-GENE-040426-2646]	cyp20a1	6	() ): :
ENSDARG00000013628	25.91	29.12	31.21	36.11	26.09	21.56	1061.71	0.00837881	0.158936	0.947993	0.981881	cd164	555639		CD164 molecule, sialomucin [Source:ZFIN	Acc:ZDB-GENE-030131-1598]	cd164	20	() ): :
ENSDARG00000014008	19.16	16.13	17.34	17.83	14.83	20.03	538.768	-0.00693439	0.129992	0.948616	0.981881	cwc22	566033		CWC22 spliceosome associated protein homolog [Source:ZFIN	Acc:ZDB-GENE-060929-452]	cwc22	9	() ): :
ENSDARG00000020101	39.71	38.66	40.84	42.29	39.73	34.27	514.297	0.00760663	0.137405	0.947698	0.981881	psmc2	393941		proteasome 26S subunit, ATPase 2 [Source:ZFIN	Acc:ZDB-GENE-040426-1327]	psmc2	4	() ): :
ENSDARG00000021380	14.46	11.65	14.3	13.31	11.27	15.24	236.472	0.00784042	0.149538	0.948612	0.981881	ppm1db	492468		protein phosphatase, Mg2+/Mn2+ dependent, 1Db [Source:ZFIN	Acc:ZDB-GENE-041114-27]	ppm1db	5	() ): :
ENSDARG00000032761	42.89	34.09	37.2	35.01	31.49	46.49	739.058	0.00758553	0.135899	0.948273	0.981881	pde4d	566998		phosphodiesterase 4D [Source:HGNC Symbol	Acc:HGNC:8783]	PDE4D	8	() ): :
ENSDARG00000035692	263.93	256.36	279.62	265.47	269.13	257.9	1840.07	-0.00586826	0.10571	0.948522	0.981881	rps3a	337240		ribosomal protein S3A [Source:NCBI gene (formerly Entrezgene)	Acc:337240]	rps3a	1	() ): :
ENSDARG00000036778	25.07	22.83	30.49	26.47	24.05	27.41	619.214	-0.00692766	0.125569	0.947505	0.981881	hbs1l	324267		HBS1-like translational GTPase [Source:ZFIN	Acc:ZDB-GENE-030131-2987]	hbs1l	23	() ): :
ENSDARG00000037551	0.06	0.33	1.13	0.28	0.91	0.16	6.0861	0.00320016	0.239987	0.948673	0.981881	pm20d1.1	553216		peptidase M20 domain containing 1, tandem duplicate 1 [Source:ZFIN	Acc:ZDB-GENE-051120-102]	pm20d1.1	23	() ): :
ENSDARG00000042970	2.9	2.28	2.73	1.57	3.69	2.59	28.0743	-0.0060824	0.219639	0.948053	0.981881	gng8	553609		guanine nucleotide binding protein (G protein), gamma 8 [Source:ZFIN	Acc:ZDB-GENE-050522-312]	gng8	21	() ): :
ENSDARG00000046071	32.15	30.13	29.7	30.36	27.01	34.88	258.583	-0.00738178	0.142475	0.948069	0.981881	zgc:77838	402980		arkadia (rnf111) N-terminal like PKA signaling regulator 2n [Source:ZFIN	Acc:ZDB-GENE-040426-1889]	ark2n	21	() ): :
ENSDARG00000052840	63.93	63.89	63.09	53.91	67.93	64.8	267.851	0.0079273	0.14725	0.94752	0.981881	ndufs4	573689		NADH:ubiquinone oxidoreductase subunit S4 [Source:ZFIN	Acc:ZDB-GENE-050522-421]	ndufs4	5	() ): :
ENSDARG00000053240	0.91	0.94	0.59	0.77	0.95	0.6	22.9819	0.00632334	0.222032	0.948146	0.981881	kif6	553436		kinesin family member 6 [Source:ZFIN	Acc:ZDB-GENE-061027-130]	kif6	17	() ): :
ENSDARG00000057949	1.1	1.25	1.08	1.11	1.17	1.17	30.3503	-0.00667137	0.21208	0.947962	0.981881	slc43a3b	556206		solute carrier family 43 member 3b [Source:ZFIN	Acc:ZDB-GENE-060312-28]	slc43a3b	14	() ): :
ENSDARG00000062280	3.49	3.55	3.76	3.4	3.47	3.9	255.786	-0.0073035	0.138276	0.947851	0.981881	hace1	572430		HECT domain and ankyrin repeat containing E3 ubiquitin protein ligase 1 [Source:NCBI gene (formerly Entrezgene)	Acc:572430]	HACE1	16	GO:0016020(cellular_component) ): :membrane,GO:0016740(molecular_function) ): :transferase activity,GO:0007049(biological_process) ): :cell cycle,GO:0005794(cellular_component) ): :Golgi apparatus,GO:0005783(cellular_component) ): :endoplasmic reticulum,GO:0004842(molecular_function) ): :ubiquitin-protein transferase activity,GO:0032580(cellular_component) ): :Golgi cisterna membrane
ENSDARG00000063627	3.6	3.56	3.52	2.56	4.5	3.25	113.4	0.00808813	0.187658	0.948318	0.981881	bop1	777627		BOP1 ribosomal biosis factor [Source:NCBI gene (formerly Entrezgene)	Acc:777627]	bop1	19	() ): :
ENSDARG00000073695	2.73	2.13	2.42	2.52	2.48	2.03	59.555	0.00818628	0.196197	0.948261	0.981881	mamdc2b	798369				10	GO:0016020(cellular_component) ): :membrane,GO:0007399(biological_process) ): :nervous system development
ENSDARG00000076171	22.9	25.7	20.75	23.78	16.56	28.51	1576.04	0.00770799	0.146998	0.948587	0.981881	znf827	565077		zinc finger protein 827 [Source:HGNC Symbol	Acc:HGNC:27193]	ZNF827	1	GO:0005634(cellular_component) ): :nucleus,GO:0046872(molecular_function) ): :metal ion binding,GO:0045944(biological_process) ): :positive regulation of transcription by RNA polymerase II,() ): :
ENSDARG00000077785	62.71	73.04	85.61	77.71	70.86	67.72	1522.41	0.00704223	0.129478	0.948432	0.981881	atf5b	567253				15	GO:0042981(biological_process) ): :regulation of apoptotic process,GO:0003677(molecular_function) ): :DNA binding,GO:0003700(molecular_function) ): :DNA-binding transcription factor activity,GO:0006355(biological_process) ): :regulation of DNA-templated transcription,GO:0005634(cellular_component) ): :nucleus,GO:0000977(molecular_function) ): :RNA polymerase II transcription regulatory region seq…
ENSDARG00000087714	6.3	7.35	8.36	0.46	5.89	17.44	256.487	-0.00278331	0.239192	0.948468	0.981881	si:ch211-226o13.1	101886579				4	() ): :
ENSDARG00000091602	7.98	6.16	8.8	8.68	5.12	8.8	251.007	0.00814364	0.171057	0.948553	0.981881	si:dkey-163f14.6	100332398				11	GO:0005509(molecular_function) ): :calcium ion binding,GO:0048513(biological_process) ): :animal organ development
ENSDARG00000092170	40.85	56.84	53.15	30.19	65.66	54.68	294.541	-0.00803782	0.185349	0.947446	0.981881	apoc1	570638		apolipoprotein C-I [Source:ZFIN	Acc:ZDB-GENE-030131-1074]	apoc1	16	() ): :
ENSDARG00000094542	4.5	4.08	5.02	5.44	4.88	3.15	62.1011	-0.00730369	0.201011	0.947424	0.981881	hwa	555985		huluwa [Source:ZFIN	Acc:ZDB-GENE-091204-94]	hwa	21	() ): :
ENSDARG00000098269	1.32	0.97	1.65	1.34	0.78	1.74	14.5663	0.0055088	0.228362	0.948319	0.981881	slc1a9	100463516				KN149943.1	() ): :
ENSDARG00000102202	12.31	11.32	12.71	10.3	12.25	13.07	255.834	0.00783876	0.144202	0.948067	0.981881	phospho2	799638		phosphatase, orphan 2 [Source:ZFIN	Acc:ZDB-GENE-080204-104]	phospho2	6	GO:0005575(cellular_component) ): :cellular_component,GO:0046872(molecular_function) ): :metal ion binding,GO:0016791(molecular_function) ): :phosphatase activity
ENSDARG00000104358	20.18	18.71	16	16.16	13.06	26.76	192.972	-0.00806726	0.180341	0.947788	0.981881						11	() ): :
ENSDARG00000104613	151.52	155.95	189.41	8.57	242.74	270.34	2151.49	-0.00313313	0.23914	0.94788	0.981881						22	() ): :
ENSDARG00000105602	1.52	1.09	1.36	1.02	1.04	1.93	7.45955	-0.00419292	0.234888	0.947559	0.981881						7	() ): :
ENSDARG00000112923	24.57	21.41	16.48	18.01	20.74	22.3	85.2661	0.00823014	0.188708	0.947983	0.981881				vitamin D receptor [Source:HGNC Symbol	Acc:HGNC:12679]	VDR	23	() ): :
ENSDARG00000042853	38.7	47.02	49.71	42.95	46.18	45.19	646.83	-0.00710678	0.130083	0.947238	0.981847	ivd	368775		isovaleryl-CoA dehydrogenase [Source:ZFIN	Acc:ZDB-GENE-030616-262]	ivd	17	() ): :
ENSDARG00000095688	0	0.79	0	0.14	0.09	0.59	4.26241	0.00244849	0.242167	0.947277	0.981847	LOC100149015	100149015				16	() ): :
ENSDARG00000102696	8.11	7.91	8.43	8	8.94	7.29	350.212	-0.00759721	0.144533	0.94695	0.981601	dnajc11	100329402		DnaJ heat shock protein family (Hsp40) member C11 [Source:HGNC Symbol	Acc:HGNC:25570]	DNAJC11	11	() ): :
ENSDARG00000098904	5.75	5.44	5.52	3.82	5.94	7.03	229.05	-0.00746961	0.169311	0.94679	0.981483	pex1	793906		peroxisomal biogenesis factor 1 [Source:ZFIN	Acc:ZDB-GENE-070530-1]	pex1	19	() ): :
ENSDARG00000037071	58.71	49.01	46.11	36.59	63.71	48.45	112.703	0.00824272	0.189258	0.946468	0.981196	rps26	336662		ribosomal protein S26 [Source:ZFIN	Acc:ZDB-GENE-030131-8606]	rps26	23	() ): :
ENSDARG00000074428	1.64	1.63	1.97	1.39	1.88	2.01	27.877	-0.00668244	0.214705	0.946467	0.981196	hhat	560334		hedgehog acyltransferase [Source:ZFIN	Acc:ZDB-GENE-051118-1]	hhat	17	GO:0016020(cellular_component) ): :membrane,GO:0005783(cellular_component) ): :endoplasmic reticulum,GO:0016409(molecular_function) ): :palmitoyltransferase activity
ENSDARG00000117486	0.23	0.66	0.42	0.58	0.29	0.51	5.42297	-0.00362607	0.237818	0.94646	0.981196						18	() ): :
ENSDARG00000075121	0.65	0.94	1.51	1.44	1.15	0.51	13.1597	-0.00477762	0.231936	0.946244	0.981105	hbegfa	797938		heparin-binding EGF-like growth factor a [Source:ZFIN	Acc:ZDB-GENE-080204-119]	hbegfa	14	GO:0016020(cellular_component) ): :membrane,GO:0060041(biological_process) ): :retina development in camera-type eye,GO:0008284(biological_process) ): :positive regulation of cell population proliferation,GO:0008083(molecular_function) ): :growth factor activity,GO:0005615(cellular_component) ): :extracellular space,GO:0009611(biological_process) ): :response to wounding,GO:0005154(molecular_func…
ENSDARG00000078151	16.53	12.54	12.99	12.44	12.36	17.53	283.544	-0.00789852	0.156377	0.946185	0.981091						19	() ): :
ENSDARG00000112909	32.17	32.54	33.31	25.07	28.88	43.17	1311.21	0.00770368	0.141469	0.946144	0.981091				zinc finger protein 462 [Source:HGNC Symbol	Acc:HGNC:21684]	ZNF462	21	() ): :
ENSDARG00000077639	5.09	5.71	5.49	5.2	4.18	7.11	214.265	-0.00785486	0.16303	0.946088	0.981085	intu	100007575		inturned planar cell polarity protein [Source:ZFIN	Acc:ZDB-GENE-110914-91]	intu	7	() ): :,GO:0005737(cellular_component) ): :cytoplasm,GO:0016192(biological_process) ): :vesicle-mediated transport,GO:0060271(biological_process) ): :cilium assembly,GO:0030030(biological_process) ): :cell projection organization,GO:0009986(cellular_component) ): :cell surface,GO:0001736(biological_process) ): :establishment of planar polarity
ENSDARG00000003021	12.7	12.9	18.29	15.94	12.61	14.29	116.889	0.00851888	0.177567	0.945983	0.981022	hdac8	406740		histone deacetylase 8 [Source:ZFIN	Acc:ZDB-GENE-040426-2772]	hdac8	7	() ): :
ENSDARG00000017773	1.06	1.33	1.17	1.32	1.34	0.87	29.7095	-0.00667262	0.215893	0.945782	0.980861	slc16a12a	557762		solute carrier family 16 member 12 [Source:HGNC Symbol	Acc:HGNC:23094]	SLC16A12	17	GO:0016020(cellular_component) ): :membrane,GO:0055085(biological_process) ): :transmembrane transport,GO:0022857(molecular_function) ): :transmembrane transporter activity,GO:0008028(molecular_function) ): :monocarboxylic acid transmembrane transporter activity,GO:0016323(cellular_component) ): :basolateral plasma membrane,GO:0015718(biological_process) ): :monocarboxylic acid transport,GO:00163…
ENSDARG00000092080	1.39	0.97	0.21	1.47	0.92	0	5.54102	0.00325855	0.24027	0.945749	0.980861	LOC108183927	108183927				4	() ): :
ENSDARG00000045422	6.51	6.23	8.79	3.86	6.78	10.62	62.8273	0.00774942	0.207791	0.945664	0.980833	otulina	406416		OTU deubiquitinase with linear linkage specificity a [Source:ZFIN	Acc:ZDB-GENE-040426-2157]	otulina	24	() ): :
ENSDARG00000069498	5	3.94	4.12	4.56	4.72	3.38	65.4297	0.0086037	0.197279	0.945497	0.980707	phkg1b	554046		phosphorylase kinase, gamma 1b (muscle) [Source:ZFIN	Acc:ZDB-GENE-050522-52]	phkg1b	21	() ): :
ENSDARG00000006617	10.43	10.04	11.43	10.46	8.78	12.81	259.922	-0.0079389	0.146332	0.94537	0.980622	napga	541353		N-ethylmaleimide-sensitive factor attachment protein, gamma a [Source:ZFIN	Acc:ZDB-GENE-050320-46]	napga	24	() ): :
ENSDARG00000103725	4.45	3.92	3.51	3.73	3.6	4.63	102.123	-0.00817026	0.177636	0.945298	0.980595	znf341	100136854		zinc finger protein 341 [Source:ZFIN	Acc:ZDB-GENE-080204-99]	znf341	23	() ): :
ENSDARG00000015445	0.16	0.23	0.23	0.11	0.1	0.46	10.9373	-0.00443782	0.234362	0.945116	0.980583	lim2.4	436680		lens intrinsic membrane protein 2.4 [Source:ZFIN	Acc:ZDB-GENE-040718-104]	lim2.4	19	() ): :
ENSDARG00000055893	0.29	0.49	0.37	0.21	0.22	0.7	4.53413	0.00368137	0.238954	0.945181	0.980583	nmnat1-rbp7a	108004541		nmnat1-rbp7a readthrough [Source:ZFIN	Acc:ZDB-GENE-160617-1]	nmnat1-rbp7a	23	() ): :
ENSDARG00000076283	48.67	49.97	54.28	56.8	54.41	40.2	145.929	-0.00813126	0.174393	0.945213	0.980583	snrpd3l	327011		small nuclear ribonucleoprotein D3 polypeptide, like [Source:ZFIN	Acc:ZDB-GENE-030131-5219]	snrpd3l	21	() ): :
ENSDARG00000090396	1.11	2.98	2.11	1.49	1.66	3.31	14.9592	-0.00511332	0.230307	0.945242	0.980583	si:cabz01074946.1	100331505				7	GO:0016020(cellular_component) ): :membrane,GO:0005886(cellular_component) ): :plasma membrane,() ): :
ENSDARG00000096045	0.48	0.49	0.42	0.44	0.59	0.37	13.2044	-0.00535795	0.228982	0.945235	0.980583	srr	100331498				4	() ): :
ENSDARG00000017155	0.25	0.48	0.12	0	0.12	0.87	3.95843	-0.00260578	0.241339	0.944982	0.980549	wnt10a	30171		wingless-type MMTV integration site family, member 10a [Source:ZFIN	Acc:ZDB-GENE-990415-278]	wnt10a	9	() ): :
ENSDARG00000037495	4.13	22.93	20.08	36.5	2.76	4.02	372.883	0.00377153	0.240068	0.944961	0.980549	rtn4rl2b	403309		reticulon 4 receptor-like 2b [Source:ZFIN	Acc:ZDB-GENE-040310-2]	rtn4rl2b	14	() ): :
ENSDARG00000094272	3.1	3.01	3.53	2.09	3.52	3.67	20.6189	0.00674181	0.221899	0.944782	0.980436						9	() ): :
ENSDARG00000057218	11.76	11.86	14.52	12.32	12.83	12.04	284.586	0.00820923	0.144036	0.944698	0.980406	tbc1d15	492676		TBC1 domain family, member 15 [Source:ZFIN	Acc:ZDB-GENE-041111-251]	tbc1d15	18	() ): :
ENSDARG00000079802	0.43	0.69	0.92	0.63	0.54	0.95	8.92416	-0.00463291	0.23361	0.944708	0.980406	aanat2	30685		arylalkylamine N-acetyltransferase 2 [Source:ZFIN	Acc:ZDB-GENE-991019-6]	aanat2	3	() ): :
ENSDARG00000073896	13.66	9.81	13.42	9.88	14.47	12.24	240.887	-0.00844947	0.167511	0.944421	0.980202	gjc2	447835		gap junction protein gamma 2 [Source:ZFIN	Acc:ZDB-GENE-040912-134]	gjc2	2	() ): :
ENSDARG00000098378	4.84	9.4	10.86	6.5	10.55	7.9	100.829	-0.00768907	0.20238	0.944332	0.980157						7	() ): :
ENSDARG00000078317	16.22	16.08	15.39	13.39	14.66	19.03	457.474	0.00802185	0.135404	0.944273	0.980143	si:dkey-175m17.7	100007304				21	() ): :
ENSDARG00000078797	2.74	1.6	2.14	2.32	1.92	2.09	128.481	0.00874111	0.181591	0.944112	0.980023	dennd3a	797970		DENN domain containing 3 [Source:HGNC Symbol	Acc:HGNC:29134]	DENND3	19	() ): :
ENSDARG00000063899	1578.49	2047.34	1623.54	2233.97	1818.22	1149.85	15284.6	-0.0105302	0.171112	0.944062	0.980023	ND2	140532	NP_059332	NADH dehydrogenase 2, mitochondrial [Source:ZFIN	Acc:ZDB-GENE-011205-8]	mt-nd2	MT	() ): :
ENSDARG00000097806	0.25	0.37	0.85	0.1	0.4	0.9	5.15029	0.00371695	0.239159	0.944067	0.980023						8	() ): :
ENSDARG00000024465	25.15	29.8	32.66	25.11	33.22	28.62	208.389	-0.00834327	0.16247	0.943866	0.979928	mrps18a	558080		mitochondrial ribosomal protein S18A [Source:ZFIN	Acc:ZDB-GENE-041210-109]	mrps18a	4	() ): :
ENSDARG00000060884	1.55	1.1	0.66	1.54	0.68	1.23	10.2045	-0.00473328	0.23341	0.943884	0.979928	nmur1a	557276		neuromedin U receptor 1 [Source:HGNC Symbol	Acc:HGNC:4518]	NMUR1	22	() ): :
ENSDARG00000101890	3.01	2.14	2.05	2.44	1.33	3.33	21.2174	0.00660708	0.223989	0.943757	0.97989	pigr	566471		polymeric immunoglobulin receptor [Source:ZFIN	Acc:ZDB-GENE-060503-327]	pigr	2	() ): :
ENSDARG00000000516	0.21	0.41	0.33	0.28	0.36	0.34	12.7027	-0.00541709	0.229649	0.943667	0.97986	ankar	368636		ankyrin and armadillo repeat containing [Source:ZFIN	Acc:ZDB-GENE-030616-533]	ankar	9	() ): :
ENSDARG00000006181	3.81	3.34	3.68	3.96	2.82	4.18	73.7382	-0.00825278	0.188318	0.943683	0.97986	hif1aa	797150		hypoxia inducible factor 1 subunit alpha a [Source:ZFIN	Acc:ZDB-GENE-080917-55]	hif1aa	13	() ): :,GO:0006355(biological_process) ): :regulation of DNA-templated transcription,GO:0005634(cellular_component) ): :nucleus,GO:0005737(cellular_component) ): :cytoplasm,GO:0046983(molecular_function) ): :protein dimerization activity,GO:0000977(molecular_function) ): :RNA polymerase II transcription regulatory region sequence-specific DNA binding,GO:0006357(biological_process) ): :regulation …
ENSDARG00000023062	0.7	0.87	1.12	0.71	0.8	1.22	45.4348	-0.00760408	0.206832	0.943395	0.97986	ccn1	403033		cellular communication network factor 1 [Source:ZFIN	Acc:ZDB-GENE-040426-3]	ccn1	23	() ): :
ENSDARG00000063075	25.35	19.59	21.88	18.53	20.67	27.85	1509.49	-0.00768222	0.134883	0.943409	0.97986	soga1	797906		microtubule crosslinking factor 2 [Source:HGNC Symbol	Acc:HGNC:16111]	MTCL2	23	() ): :,GO:0005615(cellular_component) ): :extracellular space,GO:0010506(biological_process) ): :regulation of autophagy
ENSDARG00000074989	2.11	1.4	2.63	2.94	0.98	2.45	32.7233	-0.00634115	0.221799	0.943615	0.97986	sparcl1	567331		SPARC-like 1 [Source:ZFIN	Acc:ZDB-GENE-060130-6]	sparcl1	1	() ): :
ENSDARG00000078075	15.03	15.16	15.03	15.96	13.5	14.93	402.886	0.00798874	0.130622	0.943484	0.97986	ilrun	541415		inflammation and lipid regulator with UBA-like and NBR1-like domains [Source:ZFIN	Acc:ZDB-GENE-050320-117]	ilrun	6	() ): :
ENSDARG00000086283	15.2	17.62	16.86	16.32	13.81	18.9	409.606	0.00830062	0.135652	0.943669	0.97986	cnsta	569425				17	GO:0042998(biological_process) ): :positive regulation of Golgi to plasma membrane protein transport,GO:0071253(molecular_function) ): :connexin binding,GO:0016020(cellular_component) ): :membrane,GO:0005886(cellular_component) ): :plasma membrane,GO:0005802(cellular_component) ): :trans-Golgi network,GO:0030133(cellular_component) ): :transport vesicle
ENSDARG00000094026	3.1	2.16	2.95	2.06	2.4	3.54	9.8615	0.00540334	0.232242	0.943503	0.97986						20	() ): :
ENSDARG00000096904	1.89	4.02	3.04	4.19	1.29	3.32	51.0631	0.00723348	0.219111	0.943317	0.97986						23	() ): :
ENSDARG00000102693	0.47	0.13	0.52	0.69	0.05	0.27	6.34512	0.00372461	0.239267	0.943659	0.97986						7	() ): :
ENSDARG00000103114	5.73	6.42	6.14	5.96	8.13	3.96	60.7929	-0.0076778	0.205839	0.943279	0.97986	ndufa4l2a	100003066		NDUFA4 mitochondrial complex associated like 2 [Source:HGNC Symbol	Acc:HGNC:29836]	NDUFA4L2	9	GO:0016020(cellular_component) ): :membrane,GO:0005751(cellular_component) ): :mitochondrial respiratory chain complex IV
ENSDARG00000033161	9.28	6.72	11.45	8.73	12.62	5.64	71.7904	-0.0075691	0.20805	0.943011	0.97968	sst1.2	565781		somatostatin 1, tandem duplicate 2 [Source:NCBI gene (formerly Entrezgene)	Acc:565781]		15	GO:0030334(biological_process) ): :regulation of cell migration,GO:0005576(cellular_component) ): :extracellular region,GO:0005615(cellular_component) ): :extracellular space,GO:0007165(biological_process) ): :signal transduction,GO:0005179(molecular_function) ): :hormone activity
ENSDARG00000077650	48.55	47.44	45.16	44.84	40.75	55.86	1945.6	-0.00715569	0.11325	0.942998	0.97968	tnksa	559022		tankyrase [Source:HGNC Symbol	Acc:HGNC:11941]	TNKS	21	() ): :,GO:0016740(molecular_function) ): :transferase activity,GO:0005737(cellular_component) ): :cytoplasm,GO:0005634(cellular_component) ): :nucleus,GO:0016757(molecular_function) ): :glycosyltransferase activity,GO:0003950(molecular_function) ): :NAD+ ADP-ribosyltransferase activity,GO:0090263(biological_process) ): :positive regulation of canonical Wnt signaling pathway,GO:0016779(molecular_…
ENSDARG00000052408	11.15	11.46	11.59	10.68	11.52	11.2	211.296	0.0086279	0.148033	0.94289	0.979648	mgat2	100000478		alpha-1,6-mannosyl-glycoprotein 2-beta-N-acetylglucosaminyltransferase [Source:ZFIN	Acc:ZDB-GENE-070410-54]	mgat2	20	() ): :
ENSDARG00000107053	3.33	4.98	4.74	3.59	3.13	6.74	36.8824	-0.00715117	0.214388	0.942881	0.979648						16	() ): :
ENSDARG00000087752	3.14	1.89	2.26	1.87	1.85	3.42	40.7769	0.00786684	0.212074	0.942782	0.979631	rfwd3	100329327				25	() ): :,GO:0005634(cellular_component) ): :nucleus,GO:0046872(molecular_function) ): :metal ion binding,GO:0016567(biological_process) ): :protein ubiquitination,GO:0036297(biological_process) ): :interstrand cross-link repair,GO:0004842(molecular_function) ): :ubiquitin-protein transferase activity
ENSDARG00000098368	277.27	218.59	262.11	237.05	254.24	251.74	15513.4	0.00726749	0.110152	0.942769	0.979631	aplp1	404233		amyloid beta precursor like protein 1 [Source:HGNC Symbol	Acc:HGNC:597]	APLP1	15	() ): :,GO:0031696(molecular_function) ): :alpha-2C adrenergic receptor binding,GO:0031695(molecular_function) ): :alpha-2B adrenergic receptor binding,GO:0031694(molecular_function) ): :alpha-2A adrenergic receptor binding,GO:0016020(cellular_component) ): :membrane,GO:0005886(cellular_component) ): :plasma membrane,GO:0007409(biological_process) ): :axonogenesis,GO:0007417(biological_process) )…
ENSDARG00000061848	1.04	1.13	1.72	1.14	1.08	1.59	51.675	0.00830259	0.203107	0.942577	0.979512	col15a1b	558137		collagen, type XV, alpha 1b [Source:ZFIN	Acc:ZDB-GENE-070912-689]	col15a1b	2	() ): :
ENSDARG00000100093	20.85	18.54	21.39	19.56	17.79	23.48	500.272	-0.00764673	0.124676	0.942501	0.979479	ppp2r2ba	100001644		protein phosphatase 2 regulatory subunit Bbeta [Source:HGNC Symbol	Acc:HGNC:9305]	PPP2R2B	14	() ): :
ENSDARG00000109867	12.31	13.24	12.76	12.4	11.21	15.26	81.1471	-0.00860545	0.182389	0.94233	0.979349	pimr58	108190101				5	() ): :
ENSDARG00000076068	23.97	24.09	25.92	22.83	22.36	27.67	402.018	0.00794278	0.125809	0.942262	0.979326	crtc1a	768293		CREB regulated transcription coactivator 1a [Source:ZFIN	Acc:ZDB-GENE-061027-225]	crtc1a	2	() ): :
ENSDARG00000002728	5.04	3.76	6.4	4.89	5.4	4.92	46.9803	-0.00796678	0.204039	0.941854	0.979064	kiss1ra	561898		KISS1 receptor a [Source:ZFIN	Acc:ZDB-GENE-070912-521]	kiss1ra	2	() ): :
ENSDARG00000007250	6.32	6.64	6.76	7.69	5.56	5.92	79.5952	0.00905072	0.186976	0.941881	0.979064	use1	393294		unconventional SNARE in the ER 1 homolog (S. cerevisiae) [Source:ZFIN	Acc:ZDB-GENE-040426-1015]	use1	22	() ): :
ENSDARG00000013252	0.7	0.41	0.81	0.44	0.82	0.7	15.4776	-0.0058056	0.227932	0.941787	0.979064	tmc5	561497				3	() ): :
ENSDARG00000017067	6.61	6.9	9.48	8.24	8.36	6.15	127.209	-0.00859561	0.181913	0.94193	0.979064	chordc1b	393310		cysteine and histidine-rich domain (CHORD) containing 1b [Source:NCBI gene (formerly Entrezgene)	Acc:393310]	chordc1b	10	() ): :
ENSDARG00000024877	2.03	2.36	2.9	1.68	2.33	3.41	41.2431	-0.00765145	0.2097	0.94168	0.979064	ptgr1.1	494108		prostaglandin reductase 1, tandem duplicate 1 [Source:ZFIN	Acc:ZDB-GENE-041212-80]	ptgr1.1	7	() ): :
ENSDARG00000031693	0.39	0.61	0.26	0.38	0.58	0.21	9.43771	0.0050275	0.234811	0.941965	0.979064	kif9	553438				7	() ): :
ENSDARG00000052910	3.62	2.27	3.22	3.28	2.75	3.09	41.1419	-0.00780813	0.207039	0.941814	0.979064	wnt8a	30122		wingless-type MMTV integration site family, member 8a [Source:NCBI gene (formerly Entrezgene)	Acc:30122]	wnt8a	14	() ): :
ENSDARG00000091148	0.95	0.34	1.44	0	1.04	1.46	4.85153	0.00358138	0.240065	0.941725	0.979064	crygm2d20	100000175		crystallin, gamma M2d20 [Source:ZFIN	Acc:ZDB-GENE-070424-32]	crygm2d20	9	GO:0005575(cellular_component) ): :cellular_component,GO:0007601(biological_process) ): :visual perception,GO:0005212(molecular_function) ): :structural constituent of eye lens,GO:0002088(biological_process) ): :lens development in camera-type eye,() ): :
ENSDARG00000103278	1.74	0.93	1.5	0.91	1.65	1.67	26.8668	-0.00678549	0.220049	0.941926	0.979064						14	() ): :
ENSDARG00000106630	0.84	1.63	1.33	0.7	1.33	1.64	20.5737	0.00670774	0.225151	0.941784	0.979064						24	() ): :
ENSDARG00000001803	2.76	3.09	2.26	3.13	2.05	2.79	130.037	0.0089991	0.1808	0.941506	0.979057	kcnh6a	405763		potassium voltage-gated channel, subfamily H (eag-related), member 6a [Source:ZFIN	Acc:ZDB-GENE-040702-5]	kcnh6a	3	() ): :
ENSDARG00000045853	0.72	1.06	1.45	1.31	0.83	1.17	18.3674	-0.00626069	0.225083	0.941494	0.979057	rad51ap1	555714		RAD51 associated protein 1 [Source:ZFIN	Acc:ZDB-GENE-050419-96]	rad51ap1	4	() ): :
ENSDARG00000010267	1.04	2.24	1.78	1.45	1.84	1.79	74.8033	-0.0113755	0.202156	0.9413	0.978938	dpydb	405829		dihydropyrimidine dehydrogenase b [Source:ZFIN	Acc:ZDB-GENE-040426-2459]	dpydb	2	() ): :
ENSDARG00000034313	12.22	12.05	14.66	16.15	10.39	12.28	587.637	-0.00853226	0.150528	0.941185	0.978911	ppp5c	541536		protein phosphatase 5, catalytic subunit [Source:ZFIN	Acc:ZDB-GENE-050327-75]	ppp5c	15	() ): :
ENSDARG00000036930	0.87	0.45	0.76	0.52	0.51	0.99	15.1567	0.00631893	0.228296	0.941009	0.978911	tbx18	572713		T-box transcription factor 18 [Source:ZFIN	Acc:ZDB-GENE-020529-2]	tbx18	23	() ): :
ENSDARG00000054288	0.72	0.42	0.6	0.66	0.62	0.35	8.00977	0.0051024	0.234672	0.941084	0.978911	zgc:63972	572862		zgc:63972 [Source:ZFIN	Acc:ZDB-GENE-040426-1320]	zgc:63972	5	() ): :
ENSDARG00000097284	13.02	14.5	13.77	12.83	13.23	14.47	356.117	0.00847876	0.131918	0.941178	0.978911	si:ch211-261d7.3	100537473				16	GO:0005634(cellular_component) ): :nucleus,() ): :
ENSDARG00000098696	5.21	5.7	6.49	5.02	4.7	7.42	94.2827	0.00927711	0.182645	0.941198	0.978911	rela	415099		v-rel avian reticuloendotheliosis viral oncogene homolog A [Source:ZFIN	Acc:ZDB-GENE-040825-4]	rela	7	() ): :
ENSDARG00000105014	4.73	5.28	5.2	3.83	4.62	6.49	131.629	0.00919942	0.175138	0.94123	0.978911	mre11a	406637		MRE11 homolog A, double strand break repair nuclease [Source:ZFIN	Acc:ZDB-GENE-040426-2638]	mre11a	15	() ): :
ENSDARG00000105077	6	3.76	4.71	4.19	5.45	4.31	80.4532	0.00891654	0.193629	0.940925	0.978911	hdhd5	100137610		haloacid dehalogenase like hydrolase domain containing 5 [Source:ZFIN	Acc:ZDB-GENE-080220-59]	hdhd5	25	() ): :
ENSDARG00000106669	1.99	3.37	4.08	0.93	4.05	4.06	34.5075	0.00677369	0.22523	0.941204	0.978911	LOC562542	562542				12	() ): :
ENSDARG00000103495	0.19	0.54	0.39	0.39	0.64	0.11	5.68001	-0.00373746	0.238756	0.94078	0.97882						4	() ): :
ENSDARG00000029296	19.41	19.41	20.59	19.83	17.73	21.67	1647.71	-0.00657256	0.098295	0.940731	0.978817	nexmifb	796115		neurite extension and migration factor [Source:HGNC Symbol	Acc:HGNC:29433]	NEXMIF	14	() ): :
ENSDARG00000079089	6.9	6.42	6.32	6.65	5.78	7.29	139.82	-0.00883255	0.162623	0.940694	0.978817	fbxw8	100136859		F-box and WD repeat domain containing 8 [Source:ZFIN	Acc:ZDB-GENE-080204-111]	fbxw8	5	() ): :
ENSDARG00000074720	6.65	4.04	4.74	4.32	5.33	5.2	29.9033	0.00791345	0.215127	0.940618	0.978793	si:ch211-51h9.7	558400		si:ch211-51h9.7 [Source:ZFIN	Acc:ZDB-GENE-081104-235]	si:ch211-51h9.7	8	() ): :
ENSDARG00000028048	9.12	10.44	13.69	6.34	16.81	9.8	153.281	-0.00824002	0.201682	0.940351	0.978698	rdh8a	280648		retinol dehydrogenase 8a [Source:ZFIN	Acc:ZDB-GENE-021115-3]	rdh8a	3	() ): :
ENSDARG00000036164	16.71	17.3	15.81	18.63	16.12	14.79	447.984	-0.00847706	0.143119	0.940462	0.978698	cars1	368284		cysteinyl-tRNA synthetase 1 [Source:ZFIN	Acc:ZDB-GENE-030328-29]	cars1	7	() ): :
ENSDARG00000094258	11.7	8.91	9.69	9.77	10.74	8.71	64.2826	0.0089494	0.19454	0.940481	0.978698	commd9	562660		COMM domain containing 9 [Source:ZFIN	Acc:ZDB-GENE-070424-139]	commd9	17	() ): :
ENSDARG00000103127	5.94	4.96	6.65	7.31	4.2	6.26	58.8263	-0.00836234	0.199782	0.940434	0.978698	gpn2	407722		GPN-loop GTPase 2 [Source:ZFIN	Acc:ZDB-GENE-041010-86]	gpn2	16	() ): :
ENSDARG00000008235	7.9	6.89	8.27	7.76	6.19	8.78	205.992	0.00915756	0.153815	0.940287	0.978684	cog5	567886		component of oligomeric golgi complex 5 [Source:ZFIN	Acc:ZDB-GENE-041210-47]	cog5	4	() ): :
ENSDARG00000105114	30.5	25.15	26.12	25.12	23.91	31.66	633.165	0.00840777	0.129612	0.940251	0.978684	crebrf	100149876		CREB3 regulatory factor [Source:HGNC Symbol	Acc:HGNC:24050]	CREBRF	21	GO:0003700(molecular_function) ): :DNA-binding transcription factor activity,GO:0006355(biological_process) ): :regulation of DNA-templated transcription,GO:0005634(cellular_component) ): :nucleus,GO:0000977(molecular_function) ): :RNA polymerase II transcription regulatory region sequence-specific DNA binding,GO:0006357(biological_process) ): :regulation of transcription by RNA polymerase II,GO:…
ENSDARG00000104641	11.75	12.55	14.52	13.72	11.81	13.07	913.904	-0.00763883	0.11856	0.940143	0.978629	si:ch211-261d7.6	108179605				16	GO:0000978(molecular_function) ): :RNA polymerase II cis-regulatory region sequence-specific DNA binding,GO:0006355(biological_process) ): :regulation of DNA-templated transcription,GO:0000981(molecular_function) ): :DNA-binding transcription factor activity, RNA polymerase II-specific,GO:0006357(biological_process) ): :regulation of transcription by RNA polymerase II
ENSDARG00000061682	0.94	1.26	1.5	0.73	1.54	1.31	51.5006	0.0084015	0.210003	0.939991	0.978518	bicc1a	568201		BicC family RNA binding protein 1 [Source:HGNC Symbol	Acc:HGNC:19351]	BICC1	17	GO:0005737(cellular_component) ): :cytoplasm,GO:0003676(molecular_function) ): :nucleic acid binding,GO:0003723(molecular_function) ): :RNA binding,() ): :
ENSDARG00000029795	1.45	3.56	2.53	3.17	1.33	3.34	24.3522	-0.00631338	0.225716	0.939863	0.978513	prxl2b	406605		peroxiredoxin like 2B [Source:ZFIN	Acc:ZDB-GENE-040426-2556]	prxl2b	11	() ): :
ENSDARG00000069375	0.57	0.55	0.52	0.26	1.08	0.28	5.43785	-0.00393453	0.238399	0.939768	0.978513	zgc:162608	100037332		zgc:162608 [Source:ZFIN	Acc:ZDB-GENE-070410-86]	zgc:162608	15	() ): :,GO:0042632(biological_process) ): :cholesterol homeostasis,GO:0070328(biological_process) ): :triglyceride homeostasis,GO:0005543(molecular_function) ): :phospholipid binding,GO:0060228(molecular_function) ): :phosphatidylcholine-sterol O-acyltransferase activator activity,GO:0033344(biological_process) ): :cholesterol efflux,GO:0033700(biological_process) ): :phospholipid efflux,GO:00343…
ENSDARG00000077054	1.59	1.65	1.86	1.18	2.21	1.71	31.9195	-0.00752501	0.214778	0.939935	0.978513	gask1b	566369		golgi associated kinase 1B [Source:HGNC Symbol	Acc:HGNC:25312]	GASK1B	14	() ): :
ENSDARG00000100121	2.87	3.46	2.78	3	2.35	3.54	30.2238	0.00811591	0.21345	0.939941	0.978513						12	() ): :
ENSDARG00000100419	9.61	7.52	7.77	7.42	7.84	9.69	580.394	-0.00844327	0.136425	0.939862	0.978513	ints1	562131		integrator complex subunit 1 [Source:HGNC Symbol	Acc:HGNC:24555]	INTS1	3	GO:0032039(cellular_component) ): :integrator complex,GO:0034474(biological_process) ): :U2 snRNA 3'-end processing
ENSDARG00000103984	0.75	0.98	0.68	0.43	1.14	0.68	12.7099	0.00598145	0.231112	0.939744	0.978513	cyth4b	100141338		cytohesin 4b [Source:ZFIN	Acc:ZDB-GENE-080219-45]	cyth4b	6	() ): :
ENSDARG00000077950	8.2	6.02	8.3	8.59	6.97	6.26	131.276	0.00916395	0.178109	0.939555	0.978393	tor1	565062		torsin family 1 [Source:ZFIN	Acc:ZDB-GENE-080917-50]	tor1	21	() ): :
ENSDARG00000053805	4.36	3.87	3.97	2.86	4.44	4.45	37.8697	0.00855165	0.208837	0.939349	0.978269	trub1	556642		TruB pseudouridine (psi) synthase family member 1 [Source:ZFIN	Acc:ZDB-GENE-080723-73]	trub1	12	() ): :,GO:0005739(cellular_component) ): :mitochondrion,GO:0003723(molecular_function) ): :RNA binding,GO:0016853(molecular_function) ): :isomerase activity,GO:0006396(biological_process) ): :RNA processing,GO:0009982(molecular_function) ): :pseudouridine synthase activity,GO:0001522(biological_process) ): :pseudouridine synthesis,GO:0008033(biological_process) ): :tRNA processing,GO:0009451(bio…
ENSDARG00000056519	7.95	5.52	5.31	8.1	4.46	5.78	271.221	0.00955346	0.181065	0.939308	0.978269	shtn3	557118				14	() ): :
ENSDARG00000089428	8.45	9.93	7.21	8.48	7.72	8.86	158.817	0.00952192	0.168391	0.93939	0.978269	rab12	553657		RAB12, member RAS oncogene family [Source:ZFIN	Acc:ZDB-GENE-050522-555]	rab12	2	() ): :
ENSDARG00000011326	1.84	1.36	1.16	0.55	2.56	1.24	10.6486	-0.00495727	0.234354	0.939254	0.978269	ankrd45	553808		ankyrin repeat domain 45 [Source:NCBI gene (formerly Entrezgene)	Acc:553808]	ankrd45	2	() ): :
ENSDARG00000040559	2.49	2.07	2.31	2.46	2.15	2.02	46.733	0.00898663	0.201408	0.939165	0.978223	rad1	393872		RAD1 homolog (S. pombe) [Source:ZFIN	Acc:ZDB-GENE-040426-1873]	rad1	15	() ): :
ENSDARG00000068863	4.83	6.39	7.66	6.02	5.34	7.09	75.519	0.0093626	0.190473	0.939141	0.978223	si:dkey-98f17.5	569123		si:dkey-98f17.5 [Source:ZFIN	Acc:ZDB-GENE-060526-354]	si:dkey-98f17.5	5	() ): :
ENSDARG00000074087	11.17	12.74	11.85	10.13	9.32	16.03	182.443	0.00979562	0.169926	0.939032	0.978179	nim1ka	100536336				8	() ): :
ENSDARG00000056279	0.31	0.21	0.43	0.29	0.12	0.51	9.73772	0.00538477	0.234358	0.938934	0.978124	ccdc157	368731				8	() ): :
ENSDARG00000009218	4.28	4.23	5.02	3.8	4.45	5.36	88.3695	-0.00912414	0.180718	0.938786	0.97802	mars2	566565		methionyl-tRNA synthetase 2, mitochondrial [Source:HGNC Symbol	Acc:HGNC:25133]	MARS2	14	GO:0005524(molecular_function) ): :ATP binding,GO:0000166(molecular_function) ): :nucleotide binding,GO:0004812(molecular_function) ): :aminoacyl-tRNA ligase activity,GO:0016874(molecular_function) ): :ligase activity,GO:0006412(biological_process) ): :translation,GO:0006418(biological_process) ): :tRNA aminoacylation for protein translation,GO:0004825(molecular_function) ): :methionine-tRNA liga…
ENSDARG00000108788	1.2	2.08	1.09	1.5	1.13	1.59	14.4805	0.00649562	0.228562	0.938789	0.97802	arsb	100538007		arylsulfatase B [Source:HGNC Symbol	Acc:HGNC:714]	ARSB	21	() ): :
ENSDARG00000001154	18.22	21.12	19.46	17.57	15.02	25.73	673.18	0.00931661	0.147705	0.938105	0.977867	rimbp2b	563166		RIMS binding protein 2 [Source:HGNC Symbol	Acc:HGNC:30339]	RIMBP2	8	() ): :
ENSDARG00000020217	7.02	6.55	9.53	6.57	8.74	6.97	132.657	0.00976282	0.17872	0.938192	0.977867	cpsf4	30203		cleavage and polyadenylation specific factor 4 [Source:ZFIN	Acc:ZDB-GENE-990415-180]	cpsf4	3	() ): :
ENSDARG00000020298	6.44	5.11	8.14	8.99	4.29	5.84	182.896	0.00954285	0.189569	0.938549	0.977867	btg2	30079		B-cell translocation gene 2 [Source:ZFIN	Acc:ZDB-GENE-000210-15]	btg2	22	() ): :
ENSDARG00000021913	0.58	0.8	0.59	0.62	0.66	0.61	32.726	0.00849619	0.212361	0.938018	0.977867	ak9	557708				20	() ): :
ENSDARG00000022564	15.67	16.11	17.74	16.53	17.71	14.97	135.822	-0.00974327	0.167811	0.938068	0.977867	zgc:56106	393163		zgc:56106 [Source:NCBI gene (formerly Entrezgene)	Acc:393163]	C18H11orf58	18	() ): :
ENSDARG00000026972	0.54	0.57	0.83	0.62	0.51	0.87	14.2243	-0.00627688	0.227759	0.938088	0.977867	si:ch211-119o8.6	556659		si:ch211-119o8.6 [Source:ZFIN	Acc:ZDB-GENE-070912-17]	si:ch211-119o8.6	2	() ): :
ENSDARG00000040620	12.4	11.95	12.04	12.77	11.04	12.69	114.652	-0.00930107	0.168753	0.937835	0.977867	psmg1	436987		proteasome (prosome, macropain) assembly chaperone 1 [Source:ZFIN	Acc:ZDB-GENE-040718-469]	psmg1	10	() ): :
ENSDARG00000042934	0.65	4.61	1.31	4.68	0.92	0.61	43.591	0.0055535	0.234339	0.938355	0.977867	ccn2a	321449		cellular communication network factor 2a [Source:ZFIN	Acc:ZDB-GENE-030131-102]	ccn2a	20	() ): :
ENSDARG00000056105	92.97	82.97	102.38	106.28	83.87	81.2	1453.59	0.00878205	0.133604	0.938277	0.977867	syt11b	794707		synaptotagmin XIb [Source:ZFIN	Acc:ZDB-GENE-090601-7]	syt11b	16	GO:0016020(cellular_component) ): :membrane,GO:0045202(cellular_component) ): :synapse,GO:0000149(molecular_function) ): :SNARE binding,GO:0006906(biological_process) ): :vesicle fusion,GO:0005886(cellular_component) ): :plasma membrane,GO:0005509(molecular_function) ): :calcium ion binding,GO:0005544(molecular_function) ): :calcium-dependent phospholipid binding,GO:0071277(biological_process) ):…
ENSDARG00000056374	0.63	0.39	0.16	0.39	0.21	0.54	7.9922	0.00495536	0.236165	0.938476	0.977867	noxo1b	561765		NADPH oxidase organizer 1b [Source:ZFIN	Acc:ZDB-GENE-101203-1]	noxo1b	12	GO:0005737(cellular_component) ): :cytoplasm,GO:0035091(molecular_function) ): :phosphatidylinositol binding,GO:0016176(molecular_function) ): :superoxide-generating NADPH oxidase activator activity,GO:0042554(biological_process) ): :superoxide anion generation
ENSDARG00000060192	6.2	7.44	6.64	7.26	7.16	5.13	100.137	0.00822098	0.186383	0.938439	0.977867	rpusd1	767786		RNA pseudouridine synthase domain containing 1 [Source:NCBI gene (formerly Entrezgene)	Acc:767786]	rpusd1	3	() ): :
ENSDARG00000061940	4.93	8.21	6.16	6.16	5.65	7.1	107.483	0.00964976	0.185509	0.938094	0.977867	htr4	101882850		5-hydroxytryptamine receptor 4 [Source:HGNC Symbol	Acc:HGNC:5299]	HTR4	14	() ): :
ENSDARG00000075936	20.67	19.39	21.52	20.19	18.81	22.68	177.289	-0.00903532	0.15129	0.938194	0.977867						2	() ): :
ENSDARG00000077372	25.01	18.6	22.82	25.5	22.72	17.57	676.038	-0.009239	0.155911	0.938552	0.977867	tfr1b	494478		transferrin receptor 1b [Source:ZFIN	Acc:ZDB-GENE-041220-2]	tfr1b	24	() ): :
ENSDARG00000086585	16.07	17.35	14.33	14.92	13.03	19.28	599.61	0.00913428	0.140426	0.937891	0.977867	nrg2b	100270726		neuregulin 2b [Source:ZFIN	Acc:ZDB-GENE-090205-2]	nrg2b	14	() ): :
ENSDARG00000089549	8.28	8.93	9.78	10.96	7.34	8.78	132.945	-0.00901316	0.173826	0.938148	0.977867	baalcb	100536942				20	() ): :
ENSDARG00000092687	3.17	3.3	1.95	3.78	2.22	1.85	17.6409	0.00653752	0.227161	0.938405	0.977867						5	() ): :
ENSDARG00000100083	21.13	23.1	29.1	27.14	24.39	21.15	310.589	-0.00908109	0.156392	0.938409	0.977867	sugt1	492489		SGT1 homolog, MIS12 kinetochore complex assembly cochaperone [Source:ZFIN	Acc:ZDB-GENE-041114-56]	sugt1	1	() ): :
ENSDARG00000105037	7.41	5.94	6.91	8.06	5.85	5.58	27.8055	0.00813826	0.215846	0.938068	0.977867	snrpf	445404		small nuclear ribonucleoprotein polypeptide F [Source:ZFIN	Acc:ZDB-GENE-040930-9]	snrpf	7	() ): :
ENSDARG00000009822	13.55	4.51	2.27	11.74	4.92	2.13	101.563	0.00496096	0.237332	0.937511	0.977701	her4.4	100149066		hairy-related 4, tandem duplicate 4 [Source:NCBI gene (formerly Entrezgene)	Acc:100149066]	her4.4	23	() ): :
ENSDARG00000015263	0.54	1.03	0.6	1.05	0.4	0.64	11.0384	0.00576522	0.232903	0.937469	0.977701	adma	556502		adrenomedullin a [Source:ZFIN	Acc:ZDB-GENE-120221-5]	adma	7	GO:0005576(cellular_component) ): :extracellular region,GO:0007189(biological_process) ): :adenylate cyclase-activating G protein-coupled receptor signaling pathway,GO:0005615(cellular_component) ): :extracellular space,GO:0005179(molecular_function) ): :hormone activity,GO:0003073(biological_process) ): :regulation of systemic arterial blood pressure,GO:0010460(biological_process) ): :positive r…
ENSDARG00000042671	8	6.43	10.05	8.35	8.94	7.02	105.053	-0.00925649	0.184608	0.937533	0.977701	odr4	393588		odr-4 GPCR localization factor homolog [Source:ZFIN	Acc:ZDB-GENE-080502-1]	odr4	2	() ): :
ENSDARG00000053381	21	25.63	23.03	29.93	18.49	21.4	234.511	-0.00986841	0.170415	0.937516	0.977701	plpp1a	569053		phospholipid phosphatase 1 [Source:HGNC Symbol	Acc:HGNC:9228]	PLPP1	10	GO:0016787(molecular_function) ): :hydrolase activity,GO:0016020(cellular_component) ): :membrane,GO:0005886(cellular_component) ): :plasma membrane,GO:0006629(biological_process) ): :lipid metabolic process,GO:0006644(biological_process) ): :phospholipid metabolic process,GO:0005901(cellular_component) ): :caveola,GO:0045121(cellular_component) ): :membrane raft,GO:0016324(cellular_component) ):…
ENSDARG00000075226	16.74	12.46	16.17	12.57	13.93	18.11	265.302	0.00968032	0.154949	0.937398	0.977701	smad4a	559111		SMAD family member 4a [Source:ZFIN	Acc:ZDB-GENE-990603-8]	smad4a	10	() ): :
ENSDARG00000094485	2.46	4.02	3.71	2.46	4.05	3.18	24.9669	0.00779705	0.220167	0.937381	0.977701	si:dkey-27h10.2	100150349				1	() ): :,GO:0016020(cellular_component) ): :membrane
ENSDARG00000099692	20.61	21.23	28.79	23.86	24.04	22.22	312.107	-0.00911844	0.150907	0.937394	0.977701	ccnyl1	767752		cyclin Y-like 1 [Source:NCBI gene (formerly Entrezgene)	Acc:767752]	ccnyl1	9	() ): :
ENSDARG00000103744	0.33	0.89	0.3	0.66	0.4	0.5	19.1377	-0.00612625	0.229086	0.937155	0.977638	hacd1	553326		3-hydroxyacyl-CoA dehydratase 1 [Source:ZFIN	Acc:ZDB-GENE-170413-2]	hacd1	7	() ): :
ENSDARG00000063474	33.91	30.31	30.35	27.14	31.59	34.32	2078.67	0.00837384	0.114271	0.937008	0.977545	arfgef1	100329953		ADP ribosylation factor guanine nucleotide exchange factor 1 [Source:HGNC Symbol	Acc:HGNC:15772]	ARFGEF1	24	GO:0005085(molecular_function) ): :guanyl-nucleotide exchange factor activity,GO:0015031(biological_process) ): :protein transport,GO:0032012(biological_process) ): :regulation of ARF protein signal transduction,GO:0005794(cellular_component) ): :Golgi apparatus,() ): :
ENSDARG00000094469	4.14	4.11	3.71	3.47	4.24	4.3	63.0992	-0.00916997	0.192081	0.937021	0.977545	si:ch211-148l7.4	563603		wu:fc63a07 [Source:ZFIN	Acc:ZDB-GENE-030131-3985]	wu:fc63a07	23	() ): :
ENSDARG00000043026	20.15	19.52	18.93	18.48	18.79	21.16	1049.57	-0.00853732	0.107838	0.936894	0.977507	ttbk2b	569881		tau tubulin kinase 2b [Source:ZFIN	Acc:ZDB-GENE-030131-8246]	ttbk2b	20	() ): :
ENSDARG00000115609	1.26	0.74	1.12	0.61	1.2	1.37	33.9192	-0.00772045	0.216976	0.936832	0.977489						KN150489.1	() ): :
ENSDARG00000002026	184.83	150.87	169.4	160.8	146.75	198.98	578.16	-0.00848517	0.129344	0.936463	0.977445	qkib	100462714		QKI, KH domain containing RNA binding [Source:HGNC Symbol	Acc:HGNC:21100]	QKI	13	() ): :
ENSDARG00000008553	0.12	0.59	0.25	0.34	0.33	0.21	7.38465	0.00487961	0.237002	0.93662	0.977445	zgc:136872	678524		zgc:136872 [Source:ZFIN	Acc:ZDB-GENE-060421-5204]	zgc:136872	17	GO:0016787(molecular_function) ): :hydrolase activity,GO:0006508(biological_process) ): :proteolysis,GO:0005737(cellular_component) ): :cytoplasm,GO:0046872(molecular_function) ): :metal ion binding,GO:0005509(molecular_function) ): :calcium ion binding,GO:0008233(molecular_function) ): :peptidase activity,GO:0004198(molecular_function) ): :calcium-dependent cysteine-type endopeptidase activity,G…
ENSDARG00000010794	2.33	3.07	2.08	2.07	3.25	2.12	117.759	-0.00915171	0.193119	0.936666	0.977445	tfeb	562289		transcription factor EB [Source:ZFIN	Acc:ZDB-GENE-090807-3]	tfeb	11	() ): :,GO:0003677(molecular_function) ): :DNA binding,GO:0006355(biological_process) ): :regulation of DNA-templated transcription,GO:0005634(cellular_component) ): :nucleus,GO:0046983(molecular_function) ): :protein dimerization activity,GO:0000978(molecular_function) ): :RNA polymerase II cis-regulatory region sequence-specific DNA binding,GO:0006357(biological_process) ): :regulation of trans…
ENSDARG00000045306	0.99	1.78	0.84	1.01	0.87	1.63	17.4068	0.00692463	0.227536	0.936398	0.977445	slc51a	447807		solute carrier family 51 member A [Source:ZFIN	Acc:ZDB-GENE-040912-10]	slc51a	24	() ): :
ENSDARG00000045408	6	4.95	3.38	4.43	5.04	4.26	27.3319	0.00814468	0.218215	0.936383	0.977445	tagln	751758		transgelin [Source:ZFIN	Acc:ZDB-GENE-070912-1]	tagln	15	() ): :
ENSDARG00000054754	51.14	41.07	45.24	48.01	34.63	52.92	331.416	0.00965823	0.151633	0.936609	0.977445	hs6st1a	553162		heparan sulfate 6-O-sulfotransferase 1a [Source:ZFIN	Acc:ZDB-GENE-050524-1]	hs6st1a	2	() ): :
ENSDARG00000055474	3.89	4.85	3.76	2.58	5.58	3.72	44.4115	0.0087029	0.212588	0.936275	0.977445	dexi	445307		Dexi homolog (mouse) [Source:ZFIN	Acc:ZDB-GENE-040808-20]	dexi	3	() ): :
ENSDARG00000078832	0.12	0.35	0.08	0.24	0.06	0.26	6.53488	0.00421204	0.238816	0.936717	0.977445						3	() ): :
ENSDARG00000088690	1.67	2.38	2.55	1.94	1.8	2.99	52.9071	-0.00881862	0.203005	0.936364	0.977445	ddias	497565				21	GO:0005737(cellular_component) ): :cytoplasm,GO:0005634(cellular_component) ): :nucleus,GO:0003674(molecular_function) ): :molecular_function,GO:1902230(biological_process) ): :negative regulation of intrinsic apoptotic signaling pathway in response to DNA damage
ENSDARG00000093188	8.58	8.59	10.4	9.35	8.41	9.78	243.046	-0.00897694	0.143641	0.936674	0.977445	si:dkey-75a21.2	794385		si:dkey-75a21.2 [Source:ZFIN	Acc:ZDB-GENE-030131-6823]	si:dkey-75a21.2	8	() ): :
ENSDARG00000095294	348.69	256.79	278.98	197.48	460.67	216.78	1773.58	-0.00988631	0.188384	0.936433	0.977445	si:dkey-200l5.4	795026				10	() ): :
ENSDARG00000099389	39.15	32.68	26.24	35.09	31.57	28.97	309.193	0.00989317	0.163938	0.936648	0.977445	cdo1	393714		cysteine dioxygenase, type I [Source:NCBI gene (formerly Entrezgene)	Acc:393714]	cdo1	KN149707.2	() ): :,GO:0046872(molecular_function) ): :metal ion binding,GO:0016491(molecular_function) ): :oxidoreductase activity,GO:0005506(molecular_function) ): :iron ion binding,GO:0016702(molecular_function) ): :oxidoreductase activity, acting on single donors with incorporation of molecular oxygen, incorporation of two atoms of oxygen,GO:0017172(molecular_function) ): :cysteine dioxygenase activity,G…
ENSDARG00000102959	3.51	2.22	2.67	2.01	3.37	2.69	44.5032	0.0088977	0.209348	0.936745	0.977445	zgc:171220	100126101		zgc:171220 [Source:ZFIN	Acc:ZDB-GENE-071004-11]	zgc:171220	21	GO:0005634(cellular_component) ): :nucleus,GO:0000978(molecular_function) ): :RNA polymerase II cis-regulatory region sequence-specific DNA binding,GO:0001228(molecular_function) ): :DNA-binding transcription activator activity, RNA polymerase II-specific,GO:0045944(biological_process) ): :positive regulation of transcription by RNA polymerase II,GO:0006357(biological_process) ): :regulation of t…
ENSDARG00000110973	36.65	33.75	31.76	28.86	27.59	44.84	902.477	0.00935341	0.144313	0.936415	0.977445				talin 2 [Source:HGNC Symbol	Acc:HGNC:15447]	TLN2	25	() ): :
ENSDARG00000045681	2.09	0.98	1.38	0.67	1.77	2.12	25.686	-0.00678471	0.225559	0.936021	0.97735	irf5	405811		interferon regulatory factor 5 [Source:ZFIN	Acc:ZDB-GENE-040426-2587]	irf5	4	() ): :
ENSDARG00000032261	18.24	17.36	16.21	16.46	13.91	21.93	445.926	-0.00919787	0.144497	0.935916	0.977333	rngtt	405803		RNA guanylyltransferase and 5'-phosphatase [Source:ZFIN	Acc:ZDB-GENE-040426-2087]	rngtt	20	() ): :
ENSDARG00000034897	227.13	206.26	188.2	177.41	224.22	206.44	785.902	0.00965931	0.136783	0.935959	0.977333	rps10	394121		ribosomal protein S10 [Source:ZFIN	Acc:ZDB-GENE-040426-1481]	rps10	6	() ): :
ENSDARG00000058180	0.5	0.65	0.68	0.71	0.7	0.28	15.5325	0.00676771	0.228919	0.935825	0.977333	exoc3l4	563246		exocyst complex component 3-like 4 [Source:ZFIN	Acc:ZDB-GENE-081028-71]	exoc3l4	13	() ): :
ENSDARG00000062880	7.81	10.38	10.08	8.78	7.44	12.41	321.508	-0.00950076	0.16026	0.935942	0.977333	cntn3a.1	569437				23	() ): :,GO:0005886(cellular_component) ): :plasma membrane,GO:0007156(biological_process) ): :homophilic cell adhesion via plasma membrane adhesion molecules,GO:0030424(cellular_component) ): :axon,GO:0007411(biological_process) ): :axon guidance,GO:0098632(molecular_function) ): :cell-cell adhesion mediator activity,GO:0070593(biological_process) ): :dendrite self-avoidance
ENSDARG00000069356	18.85	19.23	20.16	20.9	15.13	21.37	1216.11	0.00881771	0.124584	0.935791	0.977333	adgrl2a	57987		adhesion G protein-coupled receptor L2 [Source:HGNC Symbol	Acc:HGNC:18582]	ADGRL2	11	() ): :,GO:0071603(biological_process) ): :endothelial cell-cell adhesion,GO:0035331(biological_process) ): :negative regulation of hippo signaling,GO:0016020(cellular_component) ): :membrane,GO:0004888(molecular_function) ): :transmembrane signaling receptor activity,GO:0005886(cellular_component) ): :plasma membrane,GO:0004930(molecular_function) ): :G protein-coupled receptor activity,GO:00071…
ENSDARG00000117144	2.59	2.28	2.86	2.66	3.27	1.78	21.529	-0.00729498	0.222324	0.935788	0.977333	LOC100002544	100002544				10	() ): :
ENSDARG00000117621	23.12	15.78	25.6	30.16	18.38	16.04	98.2451	-0.00910038	0.198621	0.935578	0.977218						10	() ): :,GO:0035195(biological_process) ): :miRNA-mediated gene silencing,GO:0016442(cellular_component) ): :RISC complex
ENSDARG00000007413	8.06	7.36	9.14	7.35	7.4	9.86	494.585	-0.00872256	0.131459	0.935451	0.977199	arid2	566352		AT-rich interactive domain 2 [Source:ZFIN	Acc:ZDB-GENE-030131-6311]	arid2	4	() ): :
ENSDARG00000077461	0.19	0.21	0.31	0	0.22	0.46	5.51255	0.00410281	0.239635	0.935501	0.977199	dhx32a	100006246		DEAH (Asp-Glu-Ala-His) box polypeptide 32a [Source:ZFIN	Acc:ZDB-GENE-130613-6]	dhx32a	12	() ): :
ENSDARG00000089836	37.41	29.89	37.33	32.39	41.92	29.25	208.811	-0.00926636	0.169979	0.935428	0.977199	mrps12	793878		mitochondrial ribosomal protein S12 [Source:ZFIN	Acc:ZDB-GENE-091204-48]	mrps12	21	() ): :
ENSDARG00000100115	2.29	2.31	2.02	2.61	2.09	1.73	261.328	0.0101321	0.166883	0.935414	0.977199	dnah1	100317899		dynein axonemal heavy chain 1 [Source:HGNC Symbol	Acc:HGNC:2940]	DNAH1	11	() ): :
ENSDARG00000117504	0.3	0.16	0.32	0	0.38	0.34	4.5749	0.0039299	0.240091	0.935514	0.977199	LOC110440077	110440077				10	() ): :
ENSDARG00000088745	0.44	1.98	2.3	0	1.12	4.07	11.2207	-0.00387294	0.239266	0.935264	0.977174	mfap4.2	100126122		microfibril associated protein 4, tandem duplicate 2 [Source:ZFIN	Acc:ZDB-GENE-071004-112]	mfap4.2	1	() ): :
ENSDARG00000003845	22.96	23.66	25.58	24.6	21.93	24.31	591.767	0.0085274	0.117394	0.935014	0.97704	chm	402935		CHM Rab escort protein [Source:ZFIN	Acc:ZDB-GENE-030318-2]	chm	21	() ): :
ENSDARG00000051879	23.37	20.57	23.07	20.05	22.4	24.31	1092.84	-0.00795561	0.111495	0.93509	0.97704	abcc8	553281		ATP-binding cassette, sub-family C (CFTR/MRP), member 8 [Source:ZFIN	Acc:ZDB-GENE-050517-22]	abcc8	25	() ): :
ENSDARG00000053474	37.44	34	35.96	37.19	32.28	35.92	503.838	0.00887597	0.12385	0.935056	0.97704	tdrkh	541541		tudor and KH domain containing [Source:ZFIN	Acc:ZDB-GENE-050327-81]	tdrkh	12	() ): :
ENSDARG00000004171	9.39	8.72	9.06	7.59	10.82	7.89	161.812	0.0103454	0.172814	0.934305	0.977039	rabac1	407650		Rab acceptor 1 (prenylated) [Source:ZFIN	Acc:ZDB-GENE-040625-146]	rabac1	16	() ): :
ENSDARG00000006577	16.25	12.69	11.72	16.59	8.75	16.3	54.6908	-0.00856539	0.205517	0.93476	0.977039						8	() ): :
ENSDARG00000007603	5.09	4.61	5.29	6.03	4.17	4.38	120.929	0.0105063	0.17755	0.934133	0.977039	stxbp2	406578		syntaxin binding protein 2 [Source:ZFIN	Acc:ZDB-GENE-040426-2482]	stxbp2	3	() ): :
ENSDARG00000011312	32.88	33.21	39.27	40.93	32.15	31.48	793.144	-0.0111611	0.137387	0.934666	0.977039	stk3	324125		serine/threonine kinase 3 (STE20 homolog, yeast) [Source:NCBI gene (formerly Entrezgene)	Acc:324125]	stk3	19	GO:0005634(cellular_component) ): :nucleus,GO:0016740(molecular_function) ): :transferase activity,GO:0007165(biological_process) ): :signal transduction,GO:0004672(molecular_function) ): :protein kinase activity,GO:0004674(molecular_function) ): :protein serine/threonine kinase activity,GO:0005524(molecular_function) ): :ATP binding,GO:0000166(molecular_function) ): :nucleotide binding,GO:005126…
ENSDARG00000012574	6.1	5.91	6.52	6.1	5.88	6.16	385.9	0.00904037	0.126383	0.934525	0.977039	slkb	562769		STE20-like kinase b [Source:ZFIN	Acc:ZDB-GENE-030131-1684]	slkb	1	() ): :
ENSDARG00000015059	35.77	29.75	37.75	37.57	31.46	31.73	1033.63	0.00926752	0.128441	0.93392	0.977039	daam1a	557451		dishevelled associated activator of morphogenesis 1 [Source:HGNC Symbol	Acc:HGNC:18142]	DAAM1	17	() ): :,GO:0030036(biological_process) ): :actin cytoskeleton organization,GO:0003779(molecular_function) ): :actin binding,GO:0048793(biological_process) ): :pronephros development,GO:0001725(cellular_component) ): :stress fiber,GO:0016043(biological_process) ): :cellular component organization,GO:0021986(biological_process) ): :habenula development,GO:0031267(molecular_function) ): :small GTPas…
ENSDARG00000017617	1.57	1.15	1.29	1.13	1.24	1.74	24.8323	-0.00795524	0.217874	0.934341	0.977039	alg6	445327		ALG6 alpha-1,3-glucosyltransferase [Source:ZFIN	Acc:ZDB-GENE-040808-45]	alg6	6	GO:0016020(cellular_component) ): :membrane,GO:0016740(molecular_function) ): :transferase activity,GO:0016757(molecular_function) ): :glycosyltransferase activity,GO:0005783(cellular_component) ): :endoplasmic reticulum,GO:0005789(cellular_component) ): :endoplasmic reticulum membrane,GO:0006486(biological_process) ): :protein glycosylation,GO:0006487(biological_process) ): :protein N-linked gly…
ENSDARG00000021309	15.6	15.02	16.5	17.96	16.33	11.19	415.872	0.0102327	0.164095	0.934704	0.977039	rhoca	394125		ras homolog family member Ca [Source:ZFIN	Acc:ZDB-GENE-040426-1337]	rhoca	6	() ): :
ENSDARG00000027658	0.62	0.66	0.64	0.33	1.25	0.35	7.21024	-0.00476722	0.236923	0.934042	0.977039	irf10	405815		interferon regulatory factor 10 [Source:ZFIN	Acc:ZDB-GENE-040426-2084]	irf10	23	() ): :
ENSDARG00000027940	1.32	1.46	1.69	1.5	1.12	1.73	26.6742	0.00856046	0.216018	0.934905	0.977039	kcnf1a	557280		potassium voltage-gated channel, subfamily F, member 1a [Source:ZFIN	Acc:ZDB-GENE-041001-217]	kcnf1a	20	() ): :
ENSDARG00000030053	118.7	113.65	125.63	106.52	121.89	122.21	804.591	0.00846128	0.115602	0.934828	0.977039	eef1db	560745		eukaryotic translation elongation factor 1 delta b (guanine nucleotide exchange protein) [Source:ZFIN	Acc:ZDB-GENE-030131-6544]	eef1db	20	() ): :
ENSDARG00000030830	16.58	20.9	19.34	10.25	19.37	26.36	359.698	0.0103835	0.184864	0.933758	0.977039	cmtr1	393102		cap methyltransferase 1 [Source:NCBI gene (formerly Entrezgene)	Acc:393102]	cmtr1	23	() ): :
ENSDARG00000036139	0.4	0.56	0.3	0.32	0.25	0.67	5.99881	0.00495225	0.237319	0.93362	0.977039	lctla	437008		lactase-like a [Source:ZFIN	Acc:ZDB-GENE-040718-233]	lctla	7	() ): :
ENSDARG00000036793	3.72	4.05	3.73	3.3	2.78	5.69	145.377	-0.00974233	0.183308	0.934205	0.977039	ttll5	100006339				17	GO:0000226(biological_process) ): :microtubule cytoskeleton organization,GO:0005929(cellular_component) ): :cilium,GO:0015631(molecular_function) ): :tubulin binding,GO:0070740(molecular_function) ): :tubulin-glutamic acid ligase activity,GO:0036211(biological_process) ): :protein modification process
ENSDARG00000040571	37.04	34.19	34.81	33.43	33.83	38.51	875.556	-0.00928344	0.109718	0.934203	0.977039	ube4a	557121		ubiquitination factor E4A [Source:HGNC Symbol	Acc:HGNC:12499]	UBE4A	15	GO:0005737(cellular_component) ): :cytoplasm,GO:0005634(cellular_component) ): :nucleus,GO:0016567(biological_process) ): :protein ubiquitination,GO:0000209(biological_process) ): :protein polyubiquitination,GO:0004842(molecular_function) ): :ubiquitin-protein transferase activity,GO:0006511(biological_process) ): :ubiquitin-dependent protein catabolic process,GO:0000151(cellular_component) ): :u…
ENSDARG00000043728	5.65	4.74	6.2	7.38	4.03	5.47	35.1328	-0.00846368	0.212433	0.934343	0.977039	srek1ip1	553315		SREK1-interacting protein 1 [Source:NCBI gene (formerly Entrezgene)	Acc:553315]	srek1ip1	10	() ): :
ENSDARG00000056307	36.5	41.09	41.31	45.96	34.87	37.86	375.841	-0.00932479	0.144344	0.934697	0.977039	znf706	402905		zinc finger protein 706 [Source:ZFIN	Acc:ZDB-GENE-040718-454]	znf706	19	() ): :
ENSDARG00000056379	6.5	6.48	7.16	6.49	6.31	6.74	58.0333	0.0099916	0.192202	0.934746	0.977039	cldc1	564061		C-type lectin domain containing 1 [Source:ZFIN	Acc:ZDB-GENE-141216-19]	cldc1	16	() ): :
ENSDARG00000061505	6.98	6.33	8.16	7.1	7.03	7.26	220.965	-0.00960018	0.148351	0.934	0.977039	mrps9	751681		mitochondrial ribosomal protein S9 [Source:ZFIN	Acc:ZDB-GENE-060825-257]	mrps9	6	() ): :
ENSDARG00000074271	15.44	14.41	15.32	14.58	17.18	11.66	116.017	0.0102016	0.181344	0.934912	0.977039	get1	335756		guided entry of tail-anchored proteins factor 1 [Source:ZFIN	Acc:ZDB-GENE-030131-7696]	get1	15	() ): :
ENSDARG00000078547	1.34	0.68	0.77	1.32	0.8	0.75	12.5151	-0.00611425	0.230954	0.934091	0.977039	si:ch211-264f5.2	570749		si:ch211-264f5.2 [Source:ZFIN	Acc:ZDB-GENE-080303-2]	si:ch211-264f5.2	19	() ): :
ENSDARG00000078728	0.47	0.5	0.68	0	0.75	0.99	11.1491	-0.00453408	0.237549	0.934032	0.977039	znf1068	569852		zinc finger protein 1068 [Source:ZFIN	Acc:ZDB-GENE-080215-12]	znf1068	4	GO:0000977(molecular_function) ): :RNA polymerase II transcription regulatory region sequence-specific DNA binding,GO:0005634(cellular_component) ): :nucleus,GO:0006357(biological_process) ): :regulation of transcription by RNA polymerase II,GO:0000981(molecular_function) ): :DNA-binding transcription factor activity, RNA polymerase II-specific
ENSDARG00000079010	0.87	1.34	0.96	1.08	1.36	0.76	10.3891	-0.00580605	0.232228	0.93473	0.977039						15	() ): :
ENSDARG00000079624	13.85	12.7	14.81	15.07	11.76	13.72	814.047	0.00907038	0.123004	0.933848	0.977039	amer1	100885784		APC membrane recruitment protein 1 [Source:NCBI gene (formerly Entrezgene)	Acc:100885784]	amer1	5	() ): :
ENSDARG00000088378	0.98	0.61	0.5	1.66	0.26	0	9.89908	0.00430708	0.239315	0.934713	0.977039						4	() ): :
ENSDARG00000088764	1.38	1.15	2.23	2.06	0.81	2.12	13.0353	-0.00607651	0.231035	0.934168	0.977039				lysophospholipase like 1 [Source:ZFIN	Acc:ZDB-GENE-050306-32]	lyplal1	16	() ): :
ENSDARG00000093008	0.07	0.84	0.34	0.44	0.17	0.59	12.6728	0.00522811	0.236446	0.934583	0.977039	adgrf3b	565465				20	() ): :
ENSDARG00000099091	10.35	16.08	32.91	28.41	7.65	21.09	194.389	0.0089474	0.215173	0.934951	0.977039						5	() ): :
ENSDARG00000102964	41.09	33.87	33.88	30.7	34.5	44.08	1349.92	-0.00902882	0.131287	0.933976	0.977039	axin1	57931		axin 1 [Source:NCBI gene (formerly Entrezgene)	Acc:57931]	axin1	3	() ): :
ENSDARG00000103320	4.06	3.15	2.98	2.86	2.91	4.25	91.6288	0.0100792	0.186777	0.934954	0.977039	lclat1	406554		lysocardiolipin acyltransferase 1 [Source:ZFIN	Acc:ZDB-GENE-081211-2]	lclat1	13	() ): :
ENSDARG00000103683	16.8	15.18	16.83	14.7	15.34	17.91	403.255	0.00911721	0.126783	0.934017	0.977039	inpp5b	563543		inositol polyphosphate-5-phosphatase B [Source:HGNC Symbol	Acc:HGNC:6077]	INPP5B	16	() ): :
ENSDARG00000104307	1.01	0.96	0.65	0.95	0.95	0.57	9.81761	0.00612987	0.232785	0.934056	0.977039	hoxa1a	58051		homeobox A1a [Source:ZFIN	Acc:ZDB-GENE-000823-5]	hoxa1a	19	() ): :,GO:0003677(molecular_function) ): :DNA binding,GO:0003700(molecular_function) ): :DNA-binding transcription factor activity,GO:0006355(biological_process) ): :regulation of DNA-templated transcription,GO:0005634(cellular_component) ): :nucleus,GO:0006357(biological_process) ): :regulation of transcription by RNA polymerase II,GO:0043565(molecular_function) ): :sequence-specific DNA bindin…
ENSDARG00000105492	12.84	17.22	11.59	10.96	6.93	22.88	10.1387	0.00603617	0.233459	0.93362	0.977039						20	() ): :
ENSDARG00000006786	3.66	6.01	5.68	4.09	5.48	5.86	103.909	-0.00977929	0.188897	0.933365	0.976972	copz2	57969		COPI coat complex subunit zeta 2 [Source:ZFIN	Acc:ZDB-GENE-000406-5]	copz2	3	() ): :,GO:0016020(cellular_component) ): :membrane,GO:0005737(cellular_component) ): :cytoplasm,GO:0006886(biological_process) ): :intracellular protein transport,GO:0015031(biological_process) ): :protein transport,GO:0000139(cellular_component) ): :Golgi membrane,GO:0005794(cellular_component) ): :Golgi apparatus,GO:0006891(biological_process) ): :intra-Golgi vesicle-mediated transport,GO:0031…
ENSDARG00000022280	43.93	45.25	57.18	51.37	45.78	45.66	916.322	0.0093129	0.128206	0.933388	0.976972	brd2a	30445		bromodomain containing 2a [Source:ZFIN	Acc:ZDB-GENE-990415-248]	brd2a	19	() ): :
ENSDARG00000027609	0.56	0.46	0.44	0.31	0.47	0.72	27.6594	-0.00796445	0.218754	0.933399	0.976972	hpn	569259		hepsin [Source:ZFIN	Acc:ZDB-GENE-141212-373]	hpn	16	() ): :
ENSDARG00000104605	4.65	3.75	7.12	4.58	4.2	7.16	30.3722	-0.00818372	0.216749	0.933359	0.976972	si:ch73-299h12.4	796968				21	() ): :
ENSDARG00000031136	4.45	4.44	3.16	5.14	4.01	2.92	99.2622	-0.00959361	0.196192	0.933184	0.976956	moxd1	570584		monooxygenase, DBH-like 1 [Source:ZFIN	Acc:ZDB-GENE-030131-9320]	moxd1	20	() ): :
ENSDARG00000058351	8.95	8.24	8.89	7.84	7.78	10.57	419.083	-0.00915511	0.132821	0.933131	0.976956	tapbpl	100150889				16	() ): :
ENSDARG00000097952	0.24	0.77	0.65	0.4	0.6	0.74	6.60658	-0.004893	0.236682	0.933198	0.976956	LOC110438659	110438659				5	() ): :
ENSDARG00000102407	9.73	8.67	8.22	6.92	8.32	10.94	148.257	0.0105646	0.170902	0.933203	0.976956	cep97	386640		centrosomal protein 97 [Source:ZFIN	Acc:ZDB-GENE-031030-11]	cep97	1	() ): :
ENSDARG00000011466	6.36	6.71	8.09	7.32	6.76	7.08	125.754	-0.0100021	0.167756	0.932955	0.976934	afg1la	561238		AFG1 like ATPase a [Source:ZFIN	Acc:ZDB-GENE-091006-2]	afg1la	17	() ): :
ENSDARG00000051874	2.45	0.95	2.15	3.18	1.18	1.29	50.136	-0.00765076	0.221177	0.933001	0.976934	stra6	724007		signaling receptor and transporter of retinol STRA6 [Source:NCBI gene (formerly Entrezgene)	Acc:724007]	stra6	25	() ): :
ENSDARG00000060085	51.58	52.6	47.56	45.93	44.64	62.09	620.11	-0.00947619	0.131868	0.932946	0.976934	kcnq3	799747		potassium voltage-gated channel subfamily Q member 3 [Source:HGNC Symbol	Acc:HGNC:6297]	KCNQ3	2	() ): :
ENSDARG00000075264	1.75	1.25	1.83	1.21	1.19	2.59	49.2168	-0.00879759	0.210267	0.932949	0.976934	fam124a	556683				9	() ): :
ENSDARG00000104637	2.97	2.75	3.42	3.06	2.56	3.61	87.3878	-0.00998194	0.180797	0.932979	0.976934	fam219b	541542		family with sequence similarity 219 member B [Source:ZFIN	Acc:ZDB-GENE-050327-82]	fam219b	18	() ): :
ENSDARG00000074690	37.29	33.3	35.04	33.7	32.99	37.15	860.769	0.00825956	0.109715	0.932739	0.976897	ppm1j	556950				6	GO:0005739(cellular_component) ): :mitochondrion,GO:0004722(molecular_function) ): :protein serine/threonine phosphatase activity,GO:0004741(molecular_function) ): :[pyruvate dehydrogenase (lipoamide)] phosphatase activity,() ): :
ENSDARG00000042667	9.1	7.69	9.67	10.3	8.14	7.96	183.275	-0.0100616	0.163746	0.932687	0.97689	klf2a	117508		Kruppel like factor 2a [Source:ZFIN	Acc:ZDB-GENE-011109-1]	klf2a	22	() ): :
ENSDARG00000069766	12.56	17.69	19.8	22.52	13.2	14.43	158.26	-0.00991092	0.187176	0.932685	0.97689	caln2	100007635		calneuron 1 [Source:HGNC Symbol	Acc:HGNC:13248]	CALN1	21	GO:0016020(cellular_component) ): :membrane,GO:0005737(cellular_component) ): :cytoplasm,GO:0005886(cellular_component) ): :plasma membrane,GO:0046872(molecular_function) ): :metal ion binding,GO:0005509(molecular_function) ): :calcium ion binding,GO:0005794(cellular_component) ): :Golgi apparatus,GO:0032588(cellular_component) ): :trans-Golgi network membrane,GO:0048471(cellular_component) ): :p…
ENSDARG00000016143	16.63	15.35	17.27	17.82	15.51	15.73	343.673	-0.00950475	0.136809	0.932362	0.976644	xiap	373108		X-linked inhibitor of apoptosis [Source:ZFIN	Acc:ZDB-GENE-030825-7]	xiap	14	() ): :
ENSDARG00000098153	1.21	1.11	1.44	2.13	0.7	0.86	12.0534	0.00641375	0.232244	0.932351	0.976644	lhfpl2b	550224		LHFPL tetraspan subfamily member 2b [Source:ZFIN	Acc:ZDB-GENE-050417-10]	lhfpl2b	5	() ): :
ENSDARG00000032126	199.95	24.36	326.18	268.06	167.59	122.97	1463.9	-0.00404983	0.236898	0.9319	0.976308	LOC100330746	100330746		secretogranin V [Source:HGNC Symbol	Acc:HGNC:10816]	SCG5	20	() ): :
ENSDARG00000042660	20.18	23.99	25.3	24.94	22.99	19.36	183.376	0.0107575	0.165654	0.931948	0.976308	fam32a	431750		family with sequence similarity 32 member A [Source:ZFIN	Acc:ZDB-GENE-040704-44]	fam32a	22	() ): :
ENSDARG00000054575	2.89	1.67	2.51	1.44	2.53	2.83	24.9306	0.00842559	0.220762	0.931884	0.976308	waif2	100884149		Wnt-activated inhibitory factor 2 [Source:ZFIN	Acc:ZDB-GENE-120209-3]	waif2	10	() ): :
ENSDARG00000090721	27.5	26.93	31.97	24.25	29.86	31.98	1228.19	-0.00871206	0.120953	0.931951	0.976308	prdm2a	100003615				8	() ): :
ENSDARG00000097532	0.71	1.01	1.1	1.22	0.66	1.15	5.37181	-0.00477189	0.237465	0.931838	0.976308						24	() ): :
ENSDARG00000020387	2.14	1.66	2.28	2.82	1.81	1.56	24.6167	-0.00799096	0.220264	0.931675	0.976256	nipsnap3a	393234		nipsnap homolog 3A (C. elegans) [Source:ZFIN	Acc:ZDB-GENE-040426-1037]	nipsnap3a	14	() ): :
ENSDARG00000039578	27.86	29.75	37.04	32.36	30.32	29.59	745.921	0.0109273	0.130404	0.931628	0.976254	pa2g4a	368737		proliferation-associated 2G4, a [Source:ZFIN	Acc:ZDB-GENE-030616-161]	pa2g4a	6	() ): :
ENSDARG00000023031	0.57	0.5	0.33	0.52	0.39	0.41	8.19025	0.00605443	0.234216	0.931436	0.976189	hoxa2b	30325		homeobox A2b [Source:ZFIN	Acc:ZDB-GENE-990415-98]	hoxa2b	16	() ): :
ENSDARG00000032234	0.81	0.48	0.74	0.37	0.77	0.98	8.65614	-0.005658	0.234222	0.931521	0.976189	wnt2bb	556087		wingless-type MMTV integration site family, member 2Bb [Source:ZFIN	Acc:ZDB-GENE-060824-6]	wnt2bb	8	() ): :
ENSDARG00000044402	9.59	11.79	11.96	8.93	13.19	9.85	68.2902	0.0103425	0.195852	0.931297	0.976189	nop16	436807		NOP16 nucleolar protein homolog (yeast) [Source:ZFIN	Acc:ZDB-GENE-040718-267]	nop16	21	() ): :
ENSDARG00000059507	1.66	0.9	1.28	2.15	0.85	0.84	24.7474	-0.0072571	0.225661	0.931456	0.976189	si:dkey-163m14.2	799082		coagulation factor II thrombin receptor [Source:HGNC Symbol	Acc:HGNC:3537]	F2R	21	GO:0016020(cellular_component) ): :membrane,GO:0005886(cellular_component) ): :plasma membrane,GO:0004930(molecular_function) ): :G protein-coupled receptor activity,GO:0007165(biological_process) ): :signal transduction,GO:0007186(biological_process) ): :G protein-coupled receptor signaling pathway,GO:0035025(biological_process) ): :positive regulation of Rho protein signal transduction,GO:00072…
ENSDARG00000060707	1.9	1.28	1.25	1.71	1.13	1.81	8.21472	-0.0056985	0.234085	0.931485	0.976189	pex11a	565760		peroxisomal biogenesis factor 11 alpha [Source:ZFIN	Acc:ZDB-GENE-050419-121]	pex11a	18	() ): :
ENSDARG00000062593	3.16	3.95	3.16	3.49	3.66	3.11	122.567	-0.00942408	0.176594	0.931341	0.976189	stox1	568146		storkhead box 1 [Source:ZFIN	Acc:ZDB-GENE-030925-2]	stox1	13	() ): :
ENSDARG00000015240	37.04	44.13	39.9	37.89	36.11	47.46	1486.44	-0.0088474	0.119314	0.931085	0.97611	cdkl5	559341		cyclin dependent kinase like 5 [Source:ZFIN	Acc:ZDB-GENE-081022-110]	cdkl5	11	() ): :
ENSDARG00000017696	6.32	6.39	6.26	6.52	5.74	6.77	166.932	-0.0100733	0.154877	0.931159	0.97611	utp25	286787		UTP25 small subunit processor component [Source:ZFIN	Acc:ZDB-GENE-021217-2]	utp25	13	() ): :
ENSDARG00000095538	6.92	6.97	7.41	7.56	6.55	6.67	161.266	0.0104849	0.158654	0.931133	0.97611	senp3a	564950		SUMO specific peptidase 3a [Source:ZFIN	Acc:ZDB-GENE-030131-2303]	senp3a	5	() ): :
ENSDARG00000104733	12.66	11.82	16.27	10.96	13.56	15.19	151.89	0.0105487	0.168142	0.931174	0.97611	coq4	100137123		coenzyme Q4 homolog (S. cerevisiae) [Source:ZFIN	Acc:ZDB-GENE-060526-218]	coq4	5	() ): :
ENSDARG00000102336	0.72	0.15	0.46	0.09	0.41	0.95	5.9011	-0.00431752	0.239023	0.930884	0.975995	LOC799259	799259		solute carrier family 5 member 7 [Source:HGNC Symbol	Acc:HGNC:14025]	SLC5A7	9	() ): :
ENSDARG00000006672	14.77	22.65	18.89	22.81	17.07	16.4	175.412	-0.0103662	0.178569	0.930695	0.97594	fam49a	378872		family with sequence similarity 49 member A [Source:ZFIN	Acc:ZDB-GENE-031002-50]	fam49a	20	() ): :
ENSDARG00000019845	5.33	6.87	5.06	3.53	6.65	6.54	43.6779	0.00952231	0.211212	0.930787	0.97594	pdlim1	550568		PDZ and LIM domain 1 (elfin) [Source:ZFIN	Acc:ZDB-GENE-030131-5227]	pdlim1	13	() ): :
ENSDARG00000032725	365.94	397.7	447.23	422.1	451.85	323.76	1859.66	-0.00986268	0.144213	0.930769	0.97594	rps27a	337810		ribosomal protein S27a [Source:ZFIN	Acc:ZDB-GENE-030131-10018]	rps27a	6	() ): :
ENSDARG00000038789	7.16	8.08	9.55	9.91	6.75	8.3	97.1975	-0.0103412	0.183269	0.930473	0.97594	tmem53	436910		transmembrane protein 53 [Source:ZFIN	Acc:ZDB-GENE-040718-384]	tmem53	2	() ): :
ENSDARG00000043210	29.93	33.9	32.87	28.69	28.32	40.33	427.132	-0.0098021	0.139536	0.930585	0.97594	nfic	100005568		nuclear factor I C [Source:HGNC Symbol	Acc:HGNC:7786]	NFIC	8	() ): :
ENSDARG00000073944	9.25	7.42	7.62	6.46	8.18	9.75	1135.97	-0.00975631	0.139024	0.930584	0.97594	zfhx3a	563768				18	() ): :
ENSDARG00000088898	18.2	19.95	22.5	22.27	14.67	24.3	415.225	-0.0101644	0.153297	0.930565	0.97594	caln1	562420		calneuron 1 [Source:HGNC Symbol	Acc:HGNC:13248]	CALN1	15	GO:0016020(cellular_component) ): :membrane,GO:0005737(cellular_component) ): :cytoplasm,GO:0005886(cellular_component) ): :plasma membrane,GO:0046872(molecular_function) ): :metal ion binding,GO:0005509(molecular_function) ): :calcium ion binding,GO:0005794(cellular_component) ): :Golgi apparatus,GO:0032588(cellular_component) ): :trans-Golgi network membrane,GO:0048471(cellular_component) ): :p…
ENSDARG00000092833	0.49	2.45	0.56	0	0	3.27	16.6057	0.00235369	0.243522	0.930611	0.97594	si:dkeyp-1h4.8	100535122				18	() ): :
ENSDARG00000098284	23.07	9.55	10.05	17.49	9.05	14.72	114.793	0.00979904	0.208299	0.930747	0.97594	LOC108181225	108181225	XR_001797312	cortexin 1 [Source:HGNC Symbol	Acc:HGNC:31108]	CTXN1	22	() ): :
ENSDARG00000039349	1.29	0.88	1.51	1.23	1.54	0.6	9.58829	0.00629294	0.233704	0.930295	0.975851	qrfpra	100149491		pyroglutamylated RFamide peptide receptor [Source:HGNC Symbol	Acc:HGNC:15565]	QRFPR	13	() ): :
ENSDARG00000089490	1.33	1.5	1.09	0.91	1.51	1.59	18.5227	-0.00762058	0.224316	0.930215	0.975851	LOC101887046	101887046				19	() ): :
ENSDARG00000091418	12.07	12.23	12.72	12.06	12.3	11.8	517.705	0.00948503	0.12366	0.930288	0.975851	snx17	568263		sorting nexin 17 [Source:NCBI gene (formerly Entrezgene)	Acc:568263]	snx17	20	() ): :,GO:0016020(cellular_component) ): :membrane,GO:0005737(cellular_component) ): :cytoplasm,GO:0007165(biological_process) ): :signal transduction,GO:0006886(biological_process) ): :intracellular protein transport,GO:0015031(biological_process) ): :protein transport,GO:0035091(molecular_function) ): :phosphatidylinositol binding,GO:0030659(cellular_component) ): :cytoplasmic vesicle membrane…
ENSDARG00000016463	17.03	17.11	19.77	18.15	17.01	17.3	136.403	0.010889	0.16321	0.930011	0.975772	trappc6b	450008		trafficking protein particle complex subunit 6B [Source:ZFIN	Acc:ZDB-GENE-041010-122]	trappc6b	23	() ): :
ENSDARG00000019311	3.42	3.41	4.51	2.83	3.2	5.09	99.1849	0.0108365	0.187343	0.930076	0.975772	fbxo30b	393404		F-box protein 30b [Source:ZFIN	Acc:ZDB-GENE-040426-1125]	fbxo30b	23	() ): :
ENSDARG00000037963	1.69	2.78	2.15	0.74	2.83	3.31	13.9641	-0.0063538	0.231781	0.92983	0.975772	nek6	497165		NIMA related kinase 6 [Source:HGNC Symbol	Acc:HGNC:7749]	NEK6	21	() ): :
ENSDARG00000068192	4.86	6.45	5.54	4.78	5.14	6.58	147.412	0.0110411	0.169641	0.930002	0.975772	taf4a	100149942				11	() ): :,GO:0005634(cellular_component) ): :nucleus,GO:0003677(molecular_function) ): :DNA binding,GO:0006351(biological_process) ): :DNA-templated transcription,GO:0046982(molecular_function) ): :protein heterodimerization activity,GO:0005669(cellular_component) ): :transcription factor TFIID complex,GO:0006367(biological_process) ): :transcription initiation at RNA polymerase II promoter,GO:0006…
ENSDARG00000091260	0.9	4.07	1.2	1.4	1.74	2.88	26.0062	0.00724399	0.229717	0.930018	0.975772	mylk4a	566845		myosin light chain kinase family member 4 [Source:HGNC Symbol	Acc:HGNC:27972]	MYLK4	2	() ): :
ENSDARG00000100794	0.36	0.19	0.21	0.45	0.17	0.18	5.39844	-0.0046953	0.23804	0.930037	0.975772	mmp13b	100006896				15	() ): :
ENSDARG00000102678	3.96	5.08	4.96	3.37	4.96	5.82	49.732	-0.0097102	0.20322	0.930085	0.975772						22	() ): :
ENSDARG00000039901	49.97	46.86	47.39	47.55	38.58	56.11	357.675	0.0102961	0.139674	0.929724	0.975751				SH3 domain containing GRB2 like 2b, endophilin A1 [Source:ZFIN	Acc:ZDB-GENE-170303-2]	sh3gl2b	23	() ): :
ENSDARG00000102766	7.06	6.07	6.87	6.03	6.92	6.57	503.271	0.0104547	0.129751	0.929749	0.975751	dennd4c	558626		DENN domain containing 4C [Source:HGNC Symbol	Acc:HGNC:26079]	DENND4C	7	GO:0005737(cellular_component) ): :cytoplasm,GO:0005085(molecular_function) ): :guanyl-nucleotide exchange factor activity,GO:0031410(cellular_component) ): :cytoplasmic vesicle,GO:0000813(cellular_component) ): :ESCRT I complex,GO:0032483(biological_process) ): :regulation of Rab protein signal transduction
ENSDARG00000035835	21.51	19.12	24.81	20.05	24.99	18.19	541.639	0.0107323	0.151757	0.929353	0.975682	eef2k	437013		eukaryotic elongation factor 2 kinase [Source:ZFIN	Acc:ZDB-GENE-020916-2]	eef2k	12	() ): :
ENSDARG00000038805	8.68	3.62	4.94	4.59	8.11	4.52	77.9345	-0.00910983	0.211616	0.929566	0.975682	pigp	325316		phosphatidylinositol glycan anchor biosynthesis, class P [Source:ZFIN	Acc:ZDB-GENE-030131-4041]	pigp	10	() ): :
ENSDARG00000039824	11.31	13.7	11.03	12.07	11.15	11.92	123.996	0.011058	0.171707	0.929472	0.975682	zgc:172182	100136847		zgc:172182 [Source:NCBI gene (formerly Entrezgene)	Acc:100136847]	zgc:172182	9	() ): :
ENSDARG00000043905	10.75	13.73	12.84	10.11	14.54	12.6	182.194	-0.0105837	0.169999	0.929557	0.975682	rnf14	415177		ring finger protein 14 [Source:ZFIN	Acc:ZDB-GENE-040625-65]	rnf14	21	() ): :
ENSDARG00000071353	111.19	159.28	109.56	63.29	150.71	158.74	1575.99	0.0111004	0.186837	0.929523	0.975682	mgarpa	100002196		mitochondria localized glutamic acid rich protein a [Source:ZFIN	Acc:ZDB-GENE-141219-2]	mgarpa	14	() ): :
ENSDARG00000079907	0.32	0.41	0.46	0.56	0.42	0.25	5.94539	-0.00513303	0.236879	0.929384	0.975682	ptger4c	560057		prostaglandin E receptor 4 (subtype EP4) c [Source:ZFIN	Acc:ZDB-GENE-070705-128]	ptger4c	2	() ): :
ENSDARG00000104041	0.99	1.33	0.88	1.36	0.59	1.35	73.0203	-0.00947965	0.206872	0.929593	0.975682						4	() ): :
ENSDARG00000021255	11.49	11.08	12.69	9.46	13.37	11.19	110.068	0.0110961	0.178544	0.92924	0.975644	arhgap22	562503		Rho GTPase activating protein 22 [Source:HGNC Symbol	Acc:HGNC:30320]	ARHGAP22	13	() ): :
ENSDARG00000013705	6.67	7.98	7.11	6.49	8.11	6.39	107.161	0.0110869	0.180569	0.929126	0.975571	ccm2	436586		CCM2 scaffold protein [Source:NCBI gene (formerly Entrezgene)	Acc:436586]	ccm2	20	() ): :
ENSDARG00000035420	5	4.09	5.21	3.49	4.13	6.45	131.72	0.0111127	0.180459	0.929032	0.975539	ophn1	436982		oligophrenin 1 [Source:NCBI gene (formerly Entrezgene)	Acc:436982]	ophn1	5	() ): :
ENSDARG00000101457	12.55	9.39	13.6	10.34	12.66	11.44	204.831	0.0104772	0.163117	0.929051	0.975539	cdc42ep4a	431730		CDC42 effector protein (Rho GTPase binding) 4a [Source:ZFIN	Acc:ZDB-GENE-040704-22]	cdc42ep4a	3	() ): :
ENSDARG00000104181	33.44	36.07	33.89	38.79	30.44	31.6	170.197	0.0110574	0.162674	0.928885	0.97546	tmsb1	798430		thymosin beta 1 [Source:ZFIN	Acc:ZDB-GENE-030131-8575]	tmsb1	14	() ): :
ENSDARG00000059763	138.79	113.1	130.96	127.45	113.97	141.05	1454.74	-0.00776592	0.111606	0.928688	0.975301	gabrd	571422		gamma-aminobutyric acid type A receptor subunit delta [Source:HGNC Symbol	Acc:HGNC:4084]	GABRD	8	() ): :
ENSDARG00000000666	33.07	31.05	29.71	32.2	31.46	29.74	697.205	-0.0106045	0.126235	0.928469	0.975197	creg2	492339		cellular repressor of E1A-stimulated genes 2 [Source:ZFIN	Acc:ZDB-GENE-041114-173]	creg2	9	() ): :
ENSDARG00000017195	0.09	0.53	0.2	0.11	0.3	0.36	5.50849	0.00483921	0.238867	0.928545	0.975197	foxf2a	407681		forkhead box F2a [Source:ZFIN	Acc:ZDB-GENE-110407-5]	foxf2a	2	() ): :
ENSDARG00000031814	1.13	1.7	0.77	1.85	1.19	0.71	12.9011	-0.00632391	0.232079	0.92839	0.975197	dhrs13b.1	445116		dehydrogenase/reductase (SDR family) member 13b.1 [Source:ZFIN	Acc:ZDB-GENE-040801-253]	dhrs13b.1	15	() ): :
ENSDARG00000043553	19.82	16.75	18.63	11.58	16.97	27.72	342.778	-0.0107786	0.178926	0.92838	0.975197	ches1	555843		checkpoint suppressor 1 [Source:ZFIN	Acc:ZDB-GENE-040217-1]	ches1	20	GO:0003677(molecular_function) ): :DNA binding,GO:0003700(molecular_function) ): :DNA-binding transcription factor activity,GO:0006355(biological_process) ): :regulation of DNA-templated transcription,GO:0005634(cellular_component) ): :nucleus,GO:0043565(molecular_function) ): :sequence-specific DNA binding,GO:0000987(molecular_function) ): :cis-regulatory region sequence-specific DNA binding,GO:…
ENSDARG00000060879	0.14	0.17	0.43	0.07	0.04	0.61	4.41257	0.00412647	0.240547	0.928394	0.975197	slc28a1	571287		solute carrier family 28 member 1 [Source:ZFIN	Acc:ZDB-GENE-050419-117]	slc28a1	18	() ): :
ENSDARG00000074016	1.01	1.77	1	1.49	1.21	0.85	12.524	0.00712439	0.230793	0.928425	0.975197	ptgfr	571808		prostaglandin F receptor (FP) [Source:ZFIN	Acc:ZDB-GENE-120919-6]	ptgfr	11	() ): :
ENSDARG00000097801	2.75	3.12	1.6	3.16	2.93	0.77	11.6174	0.00641787	0.233837	0.928523	0.975197						6	() ): :
ENSDARG00000070590	13.49	13.56	14.69	12.89	14.1	14.74	172.717	-0.00893902	0.153427	0.928172	0.975137	nt5c1ab	799449		5'-nucleotidase, cytosolic IA [Source:HGNC Symbol	Acc:HGNC:17819]	NT5C1A	17	GO:0005829(cellular_component) ): :cytosol,GO:0000166(molecular_function) ): :nucleotide binding,GO:0000287(molecular_function) ): :magnesium ion binding,GO:0005737(cellular_component) ): :cytoplasm,GO:0008253(molecular_function) ): :5'-nucleotidase activity,GO:0009117(biological_process) ): :nucleotide metabolic process,GO:0046085(biological_process) ): :adenosine metabolic process,() ): :
ENSDARG00000005749	0.1	0.62	0.07	0.1	0.27	0.38	12.1633	0.00546363	0.23735	0.927992	0.975022	cand2	555955		cullin-associated and neddylation-dissociated 2 (putative) [Source:ZFIN	Acc:ZDB-GENE-060503-645]	cand2	22	() ): :
ENSDARG00000006206	0.11	0.61	1.04	0.14	0.32	1.21	4.56183	0.00430724	0.240277	0.927735	0.975022	pou4f3	30534		POU class 4 homeobox 3 [Source:ZFIN	Acc:ZDB-GENE-990415-24]	pou4f3	9	() ): :
ENSDARG00000008292	42.89	36.81	47.62	44.76	42.38	39.15	782.379	-0.0111213	0.129971	0.927848	0.975022	eif2s3	327341		eukaryotic translation initiation factor 2, subunit 3 gamma [Source:ZFIN	Acc:ZDB-GENE-030131-5552]	eif2s3	24	() ): :
ENSDARG00000025131	1.27	0.42	0.89	0.82	0.88	0.72	17.2141	0.00772576	0.228102	0.927927	0.975022	lbx2	64276		ladybird homeobox 2 [Source:ZFIN	Acc:ZDB-GENE-001206-2]	lbx2	14	() ): :
ENSDARG00000036460	2.19	1.58	2.73	1.37	1.98	2.97	41.4359	0.00990198	0.212102	0.927624	0.975022	tmtops3a	102031125		teleost multiple tissue opsin 3a [Source:ZFIN	Acc:ZDB-GENE-130828-1]	tmtops3a	14	() ): :
ENSDARG00000054804	70.72	71.63	90.93	78.77	75.52	73.18	1576.57	0.00968317	0.120762	0.927805	0.975022	anp32e	406562		acidic (leucine-rich) nuclear phosphoprotein 32 family, member E [Source:NCBI gene (formerly Entrezgene)	Acc:406562]	anp32e	19	() ): :
ENSDARG00000075467	3.04	2.08	2.45	1.81	2.48	3.1	104.052	0.0110846	0.187267	0.927976	0.975022	shisa3	791180		shisa family member 3 [Source:ZFIN	Acc:ZDB-GENE-070112-2022]	shisa3	14	() ): :
ENSDARG00000091879	1.31	1.55	1.82	1.34	1.39	1.76	17.4123	0.00842566	0.224075	0.927778	0.975022	si:dkey-29d8.3	556220		si:dkey-29d8.3 [Source:ZFIN	Acc:ZDB-GENE-070912-508]	si:dkey-29d8.3	2	() ): :
ENSDARG00000103099	5.6	5.17	4.51	3.94	4.74	6.9	74.2445	-0.0104211	0.19341	0.927999	0.975022	ears2	751732		glutamyl-tRNA synthetase 2, mitochondrial [Source:NCBI gene (formerly Entrezgene)	Acc:751732]	ears2	1	() ): :
ENSDARG00000117719	2.59	2.32	2.3	2.31	1.46	3.35	70.5824	0.0109886	0.200033	0.928016	0.975022						12	() ): :
ENSDARG00000060618	56.29	51.02	52.69	47.18	42.02	69.13	1481.6	0.0104169	0.135905	0.927473	0.974925	ipo13b	100319138		importin 13 [Source:HGNC Symbol	Acc:HGNC:16853]	IPO13	20	() ): :
ENSDARG00000074531	55.19	71.88	40.63	47.68	48.06	75.39	1865.91	-0.0117076	0.167369	0.927405	0.974911	spag9a	558833		sperm associated antigen 9a [Source:ZFIN	Acc:ZDB-GENE-070820-7]	spag9a	3	() ): :
ENSDARG00000094012	0.45	1.25	0.91	0.56	1.27	0.84	9.15671	-0.0059137	0.234632	0.927415	0.974911	si:dkey-192g7.3	100321723				9	GO:0016020(cellular_component) ): :membrane,GO:0005886(cellular_component) ): :plasma membrane,GO:0009897(cellular_component) ): :external side of plasma membrane,GO:0007166(biological_process) ): :cell surface receptor signaling pathway,GO:0006955(biological_process) ): :immune response,GO:0071222(biological_process) ): :cellular response to lipopolysaccharide,GO:0031295(biological_process) ): :…
ENSDARG00000094852	1.03	2.16	1.24	1.68	1.26	1.78	4.21577	-0.00461397	0.238871	0.927289	0.974873						5	() ): :
ENSDARG00000040245	39.03	30.24	38.8	35.62	36.88	34.82	1156.05	-0.00969735	0.125318	0.927097	0.974719	kpnb3	569455		karyopherin (importin) beta 3 [Source:ZFIN	Acc:ZDB-GENE-030424-2]	kpnb3	1	() ): :
ENSDARG00000061143	10.6	11.18	12.67	11.18	11.87	11.2	463.825	-0.00994065	0.130157	0.927092	0.974719	tapt1b	559710		transmembrane anterior posterior transformation 1b [Source:NCBI gene (formerly Entrezgene)	Acc:559710]	tapt1b	1	() ): :
ENSDARG00000105727	0.46	2.42	5.84	2.27	3.81	2.98	6.04926	-0.00472761	0.238622	0.926868	0.974573						4	() ): :
ENSDARG00000004343	18.95	15.38	17.7	16.23	17.53	16.91	246.327	0.00754577	0.147487	0.926784	0.974532	nelfe	436648		negative elongation factor complex member E [Source:ZFIN	Acc:ZDB-GENE-040718-69]	nelfe	19	() ): :
ENSDARG00000006151	12.66	12.03	13.69	9.95	10.37	17.61	275.579	0.0114405	0.163923	0.926647	0.974532	pde11al	569112				16	() ): :
ENSDARG00000013251	0.28	0.5	0.47	0.29	0.44	0.43	8.02742	0.00638736	0.234432	0.926628	0.974532	hsf4	503739		heat shock transcription factor 4 [Source:ZFIN	Acc:ZDB-GENE-050306-18]	hsf4	18	() ): :
ENSDARG00000013653	2.43	2.16	2.97	2.81	2.98	1.7	67.7385	-0.0103066	0.201564	0.926726	0.974532	adgrl4	406676		adhesion G protein-coupled receptor L4 [Source:NCBI gene (formerly Entrezgene)	Acc:406676]	adgrl4	11	() ): :
ENSDARG00000052131	3.11	3.53	4.18	4.12	3	3.73	248.284	-0.0108467	0.156444	0.926772	0.974532	gli3	403042		GLI family zinc finger 3 [Source:ZFIN	Acc:ZDB-GENE-041111-162]	gli3	24	() ): :
ENSDARG00000056757	2.01	1.66	1.97	2	2.18	1.53	17.7151	-0.00804847	0.224257	0.926574	0.974532				solute carrier family 39 member 8 [Source:HGNC Symbol	Acc:HGNC:20862]	SLC39A8	13	() ): :
ENSDARG00000078701	1.36	1.5	1.27	1.03	1.63	1.52	36.0595	-0.00963865	0.210669	0.926663	0.974532	prdm13	796276		PR domain containing 13 [Source:ZFIN	Acc:ZDB-GENE-080616-1]	prdm13	16	GO:0005634(cellular_component) ): :nucleus,GO:0016740(molecular_function) ): :transferase activity,GO:0010468(biological_process) ): :regulation of gene expression,GO:0008168(molecular_function) ): :methyltransferase activity,GO:0032259(biological_process) ): :methylation,GO:0021702(biological_process) ): :cerebellar Purkinje cell differentiation,GO:0030902(biological_process) ): :hindbrain devel…
ENSDARG00000115167	0.96	1.32	1.12	1.19	1.54	0.72	7.87321	-0.00594289	0.234853	0.926496	0.974532						KZ116008.1	() ): :
ENSDARG00000011418	13.67	13.78	12.59	16.9	11.43	11.9	132.075	-0.0111173	0.178172	0.925897	0.974403	sigmar1	393952		sigma non-opioid intracellular receptor 1 [Source:NCBI gene (formerly Entrezgene)	Acc:393952]	sigmar1	10	() ): :
ENSDARG00000023303	8.86	9.36	15.07	9.74	9.44	13.32	306.965	0.0115576	0.167723	0.926283	0.974403	zgc:66427	406256		zgc:66427 [Source:ZFIN	Acc:ZDB-GENE-040426-1913]	zgc:66427	2	() ): :
ENSDARG00000025581	439.69	344.09	353.34	356.75	385.59	392.38	2202.05	-0.0097345	0.122717	0.925972	0.974403	rpl10	336712		ribosomal protein L10 [Source:ZFIN	Acc:ZDB-GENE-030131-8656]	rpl10	23	() ): :
ENSDARG00000033537	8.42	8.25	7.14	7.63	7.67	8.62	150.075	-0.0110184	0.16275	0.926271	0.974403	p4ha1a	562774		prolyl 4-hydroxylase, alpha polypeptide I a [Source:ZFIN	Acc:ZDB-GENE-040724-91]	p4ha1a	12	() ): :
ENSDARG00000038802	0.87	0.78	1.84	1.46	1.03	1.11	15.9596	-0.00735921	0.228434	0.926217	0.974403	cenpl	445401		centromere protein L [Source:NCBI gene (formerly Entrezgene)	Acc:445401]	cenpl	2	() ): :
ENSDARG00000045092	9.01	8.51	8.82	8.35	8.56	9.5	147.973	-0.01101	0.158277	0.926058	0.974403	cdk5rap3	415195		CDK5 regulatory subunit associated protein 3 [Source:ZFIN	Acc:ZDB-GENE-040625-90]	cdk5rap3	12	() ): :
ENSDARG00000063310	41.28	33.37	39.07	26.4	41.86	45.88	1445.92	-0.0108403	0.152014	0.925923	0.974403	oxr1b	570476		oxidation resistance 1b [Source:ZFIN	Acc:ZDB-GENE-030131-2438]	oxr1b	19	() ): :
ENSDARG00000089190	11.99	10.99	7.67	9.87	9.33	11.76	783.909	-0.0108625	0.153487	0.926013	0.974403	tanc1b	100334650				9	() ): :
ENSDARG00000090973	5.39	3.53	3.69	3.88	4.61	3.61	60.7912	0.0109388	0.200585	0.926022	0.974403	ccdc50b	561649				11	() ): :
ENSDARG00000096709	0.35	3.44	0	1.71	1.39	0.44	6.20906	0.00391524	0.241266	0.9263	0.974403						20	() ): :
ENSDARG00000100725	17.03	11.99	14.41	11.97	13.41	18.43	367.507	-0.0110222	0.156045	0.926076	0.974403	ephb4a	30688		eph receptor B4a [Source:ZFIN	Acc:ZDB-GENE-990415-62]	ephb4a	5	() ): :
ENSDARG00000103148	0.23	0.79	0.88	0.57	0.39	0.85	12.4321	0.0068835	0.232819	0.926184	0.974403	nectin4b	794920				2	() ): :
ENSDARG00000021566	0.51	0.24	0.47	0.21	0.16	0.98	6.86433	-0.00508695	0.237824	0.925483	0.974222				otopetrin 1 [Source:HGNC Symbol	Acc:HGNC:19656]	OTOP1	14	() ): :
ENSDARG00000038467	11.54	12.63	11.82	11.51	9.59	14.42	507.918	0.010817	0.136789	0.925245	0.974222	igsf8	404631		immunoglobulin superfamily, member 8 [Source:ZFIN	Acc:ZDB-GENE-040426-2444]	igsf8	6	() ): :
ENSDARG00000038709	3.86	2.67	2.84	3.11	2.55	3.98	28.3244	-0.00929539	0.215796	0.925473	0.974222	myadmb	561899		myeloid associated differentiation marker [Source:HGNC Symbol	Acc:HGNC:7544]	MYADM	2	() ): :
ENSDARG00000044074	0.64	0.91	0.69	0.73	0.93	0.61	31.8716	-0.00938387	0.215303	0.925068	0.974222	loxl2b	791144		lysyl oxidase-like 2b [Source:ZFIN	Acc:ZDB-GENE-050208-29]	loxl2b	5	() ): :
ENSDARG00000045485	72.66	59.56	68.33	59.75	70.62	69.35	938.1	-0.00994517	0.123841	0.925342	0.974222	rassf8b	393334		Ras association domain family member 8b [Source:ZFIN	Acc:ZDB-GENE-040426-1338]	rassf8b	4	() ): :
ENSDARG00000054690	6.16	5.32	7.43	5.6	4.79	8.22	123.737	0.0116082	0.179555	0.925396	0.974222	si:dkey-166k12.1	100001249				19	GO:0016020(cellular_component) ): :membrane,GO:0055085(biological_process) ): :transmembrane transport,GO:0022857(molecular_function) ): :transmembrane transporter activity,() ): :
ENSDARG00000056030	1.71	1.98	0.37	0.49	2.3	1.41	8.86261	-0.00535528	0.237095	0.925198	0.974222	hoxb7a	58044		homeobox B7a [Source:ZFIN	Acc:ZDB-GENE-000329-2]	hoxb7a	3	GO:0003677(molecular_function) ): :DNA binding,GO:0003700(molecular_function) ): :DNA-binding transcription factor activity,GO:0006355(biological_process) ): :regulation of DNA-templated transcription,GO:0005634(cellular_component) ): :nucleus,GO:0000981(molecular_function) ): :DNA-binding transcription factor activity, RNA polymerase II-specific,GO:0006357(biological_process) ): :regulation of t…
ENSDARG00000058822	2.63	1.4	2.3	2.01	1.52	3.07	19.7512	-0.00818146	0.224458	0.925189	0.974222	wnt3a	60632		wingless-type MMTV integration site family, member 3A [Source:ZFIN	Acc:ZDB-GENE-001106-1]	wnt3a	2	() ): :
ENSDARG00000070126	0.12	0.22	1.45	0.28	0.55	0.86	5.81882	-0.00430802	0.239863	0.925162	0.974222						4	() ): :
ENSDARG00000071699	2.68	2.5	2.5	4.14	1.99	1.69	44.6625	-0.00932929	0.214906	0.925587	0.974222	ids	559959		iduronate 2-sulfatase [Source:ZFIN	Acc:ZDB-GENE-061215-37]	ids	14	() ): :
ENSDARG00000074564	60.98	51.71	47.52	48.38	54.87	53.31	598.74	0.0108342	0.137996	0.925303	0.974222	tlcd3bb	558881		TLC domain containing 3B [Source:HGNC Symbol	Acc:HGNC:25295]	TLCD3B	12	() ): :
ENSDARG00000078133	14.67	11.63	15.27	15.86	11.43	13.27	792.365	0.0109563	0.140168	0.925572	0.974222	kdm2ab	799441		lysine demethylase 2A [Source:HGNC Symbol	Acc:HGNC:13606]	KDM2A	14	GO:0003677(molecular_function) ): :DNA binding,GO:0005634(cellular_component) ): :nucleus,GO:0046872(molecular_function) ): :metal ion binding,GO:0008270(molecular_function) ): :zinc ion binding,GO:0016491(molecular_function) ): :oxidoreductase activity,GO:0006325(biological_process) ): :chromatin organization,GO:0051213(molecular_function) ): :dioxygenase activity,() ): :
ENSDARG00000090013	19.28	22.9	18.93	19.32	16.75	24.05	180.968	0.0112192	0.162741	0.925532	0.974222						17	() ): :
ENSDARG00000093364	8.65	8.13	6.91	2.92	5.94	16.4	25.2408	-0.0074953	0.228095	0.92534	0.974222						8	() ): :
ENSDARG00000058285	0.6	0.97	0.85	1.76	0.24	0.53	23.9876	-0.00685547	0.231593	0.924708	0.97396	cpt1b	449677		carnitine palmitoyltransferase 1B (muscle) [Source:ZFIN	Acc:ZDB-GENE-041010-9]	cpt1b	18	() ): :
ENSDARG00000089418	28.49	22.85	30.25	22.39	34.1	24.46	422.522	-0.0112809	0.16328	0.924518	0.973807	si:dkey-164f24.2	566607		si:dkey-164f24.2 [Source:ZFIN	Acc:ZDB-GENE-030131-7035]	si:dkey-164f24.2	8	() ): :
ENSDARG00000020364	0.3	1.15	0.14	0	1.29	0	5.19187	0.00366499	0.241893	0.924403	0.973764	fbp1b	282672		fructose-1,6-bisphosphatase 1b [Source:ZFIN	Acc:ZDB-GENE-021206-11]	fbp1b	5	() ): :
ENSDARG00000117787	0.52	0.51	0.53	0.52	0.49	0.61	12.1095	-0.00746966	0.22906	0.924432	0.973764						18	() ): :
ENSDARG00000025518	12.72	13.8	16.43	11.32	17.58	13.88	156.508	-0.0113865	0.176417	0.924336	0.973758	f8a	450058		coagulation factor VIII associated [Source:ZFIN	Acc:ZDB-GENE-041010-181]	f8a	1	() ): :
ENSDARG00000102636	17.53	18.67	18.33	19.43	17.46	17.48	410.606	-0.0104386	0.132652	0.924162	0.973623	trmt9b	326652		tRNA methyltransferase 9B [Source:ZFIN	Acc:ZDB-GENE-030131-4851]	trmt9b	15	() ): :
ENSDARG00000094160	6.34	6.42	7.81	7.38	7.23	5.95	76.8989	-0.011243	0.188102	0.924074	0.973577	dleu7	100334658		deleted in lymphocytic leukemia 7 [Source:ZFIN	Acc:ZDB-GENE-100922-213]	dleu7	1	() ): :
ENSDARG00000045299	3.47	1.81	1.94	2.44	2.77	2.12	25.5494	-0.00885824	0.220883	0.923978	0.973545	vmo1b	793799		vitelline membrane outer layer 1 homolog b [Source:ZFIN	Acc:ZDB-GENE-120215-131]	vmo1b	21	GO:0005615(cellular_component) ): :extracellular space
ENSDARG00000071878	10.37	11.78	13.61	15	11.01	9.8	99.233	-0.0101809	0.187161	0.923914	0.973545	trmt112	553790		tRNA methyltransferase activator subunit 11-2 [Source:ZFIN	Acc:ZDB-GENE-050522-30]	trmt112	14	() ): :
ENSDARG00000100624	15.1	13.06	14.31	9.28	14.24	18.1	206.264	0.0119535	0.174311	0.923999	0.973545	si:cabz01066312.1	100537698				4	() ): :
ENSDARG00000000540	13.85	8.14	12.01	7.8	13.78	12.47	220.095	-0.0113232	0.184304	0.923817	0.973515				ASNSD1 upstream open reading frame [Source:ZFIN	Acc:ZDB-GENE-170731-1]	asnsd1	9	() ): :
ENSDARG00000031506	7.9	5.05	8.03	6.14	6.57	8.47	122.549	-0.0114052	0.180154	0.923719	0.973515	flvcr2b	569329		FLVCR choline and putative heme transporter 2 [Source:HGNC Symbol	Acc:HGNC:20105]	FLVCR2	20	GO:0016020(cellular_component) ): :membrane,GO:0055085(biological_process) ): :transmembrane transport,GO:0022857(molecular_function) ): :transmembrane transporter activity,GO:0020037(molecular_function) ): :heme binding,GO:0015232(molecular_function) ): :heme transmembrane transporter activity,GO:0097037(biological_process) ): :heme export,() ): :
ENSDARG00000037913	2.62	1.53	3.21	3.42	2.09	1.38	17.0167	0.00809799	0.228491	0.923755	0.973515	nmrk1	541321		nicotinamide riboside kinase 1 [Source:ZFIN	Acc:ZDB-GENE-050320-8]	nmrk1	3	GO:0005737(cellular_component) ): :cytoplasm,GO:0016301(molecular_function) ): :kinase activity,GO:0016310(biological_process) ): :phosphorylation,GO:0050262(molecular_function) ): :ribosylnicotinamide kinase activity
ENSDARG00000055813	1.1	0.34	0.91	1.38	0.4	0.65	12.0342	-0.00637049	0.233961	0.923766	0.973515	mhc1lca	100000140				3	() ): :
ENSDARG00000091640	1.59	1.21	1.12	1.36	1.45	0.82	11.3353	0.00740095	0.231256	0.923835	0.973515	rhno1	100334600		RAD9-HUS1-RAD1 interacting nuclear orphan 1 [Source:ZFIN	Acc:ZDB-GENE-141219-42]	rhno1	4	() ): :
ENSDARG00000092083	7.28	0	9.38	3.81	4.69	6.63	4.80124	0.00453934	0.240196	0.923782	0.973515						4	() ): :
ENSDARG00000003069	12	9.95	11.21	9.06	10.66	13.64	424.47	-0.0109918	0.143164	0.923256	0.973488	btbd7	568372		BTB (POZ) domain containing 7 [Source:ZFIN	Acc:ZDB-GENE-030131-4477]	btbd7	20	() ): :
ENSDARG00000020596	12.82	8.03	10.84	9.66	9.37	11.94	211.629	0.0120089	0.16541	0.923375	0.973488	miga1	450070		mitoguardin 1 [Source:ZFIN	Acc:ZDB-GENE-041010-193]	miga1	2	() ): :
ENSDARG00000027078	15.34	13.26	19.25	13.59	17.28	16.85	369.117	-0.0112279	0.15057	0.923269	0.973488	cnppd1	334868		cyclin Pas1/PHO80 domain containing 1 [Source:ZFIN	Acc:ZDB-GENE-030131-6808]	cnppd1	1	() ): :
ENSDARG00000039605	1.03	1.23	0.97	0.67	1.88	0.41	25.5399	0.00813617	0.228648	0.923507	0.973488	mat1a	334195		methionine adenosyltransferase 1A [Source:ZFIN	Acc:ZDB-GENE-030131-6127]	mat1a	13	() ): :
ENSDARG00000063230	1.16	1.01	1.17	1.27	0.39	1.61	15.4782	0.00778448	0.230088	0.923238	0.973488	bmp7b	557567		bone morphogenetic protein 7b [Source:ZFIN	Acc:ZDB-GENE-060929-328]	bmp7b	23	() ): :
ENSDARG00000096305	1.26	1.39	1.35	1.41	1.25	1.06	9.54634	0.00724155	0.232335	0.92341	0.973488	si:ch73-269m14.3	100535345				21	() ): :
ENSDARG00000100196	4.1	3.99	5.42	5.82	3.74	4.16	36.2622	-0.0100433	0.210962	0.923539	0.973488	znf1160	568663		zinc finger protein 1160 [Source:ZFIN	Acc:ZDB-GENE-050208-624]	znf1160	22	() ): :
ENSDARG00000101891	14.3	15.9	15.28	13.21	14.05	17.55	1329.05	0.00998646	0.115781	0.923466	0.973488	arid1ab	568161		AT-rich interaction domain 1A [Source:HGNC Symbol	Acc:HGNC:11110]	ARID1A	19	() ): :
ENSDARG00000105113	16.26	17.42	17.87	23.26	13.02	15.43	407.435	-0.0114758	0.167056	0.923342	0.973488	galr2b	798737		galanin receptor 2b [Source:ZFIN	Acc:ZDB-GENE-131121-48]	galr2b	3	() ): :
ENSDARG00000004074	11.88	12.78	10.27	12.47	8.83	14.06	411.856	-0.0113482	0.154419	0.922957	0.973309	bach2b	555350		BTB domain and CNC homolog 2 [Source:HGNC Symbol	Acc:HGNC:14078]	BACH2	20	() ): :,GO:0003677(molecular_function) ): :DNA binding,GO:0003700(molecular_function) ): :DNA-binding transcription factor activity,GO:0006355(biological_process) ): :regulation of DNA-templated transcription,GO:0005634(cellular_component) ): :nucleus,GO:0000978(molecular_function) ): :RNA polymerase II cis-regulatory region sequence-specific DNA binding,GO:0006357(biological_process) ): :regulat…
ENSDARG00000038695	47.45	53.03	62.61	61.27	51.85	48.92	1225.48	-0.0107161	0.134961	0.922964	0.973309	elavl1a	30736		ELAV like RNA binding protein 1a [Source:ZFIN	Acc:ZDB-GENE-990415-245]	elavl1a	2	() ): :
ENSDARG00000006370	70.14	63.21	63.83	62.86	70.57	62.69	1014.1	-0.0102304	0.124576	0.922724	0.9733	atp6v1h	286779		ATPase H+ transporting V1 subunit H [Source:ZFIN	Acc:ZDB-GENE-021219-2]	atp6v1h	2	() ): :
ENSDARG00000017742	9.61	9.6	9	7.22	7.55	13.11	248.583	0.0120082	0.169191	0.922827	0.9733	grm6a	568484		glutamate receptor, metabotropic 6a [Source:ZFIN	Acc:ZDB-GENE-060208-1]	grm6a	8	() ): :
ENSDARG00000018047	18.95	20.34	19.56	23.78	17.25	16.23	320.564	0.011907	0.159995	0.922832	0.9733	brms1lb	562889				20	() ): :,GO:0005634(cellular_component) ): :nucleus,GO:0000122(biological_process) ): :negative regulation of transcription by RNA polymerase II,GO:0070822(cellular_component) ): :Sin3-type complex,GO:0042826(molecular_function) ): :histone deacetylase binding,GO:0005654(cellular_component) ): :nucleoplasm
ENSDARG00000067752	1.92	1.28	1.87	2.32	1.38	1.49	24.0526	-0.00903763	0.220543	0.922865	0.9733	pigl	561471		phosphatidylinositol glycan anchor biosynthesis, class L [Source:ZFIN	Acc:ZDB-GENE-050506-60]	pigl	5	() ): :
ENSDARG00000105603	1.03	1.75	2.02	2.15	1.59	1.18	6.28457	-0.00572622	0.236539	0.922857	0.9733						7	() ): :
ENSDARG00000096107	4.47	9	7.25	8.85	5.98	6.18	59.6351	-0.0104679	0.206953	0.92263	0.973289						4	() ): :
ENSDARG00000044692	3.92	6.13	6.4	4.71	6.75	4.98	84.1617	-0.0111582	0.196268	0.922582	0.973286	eri1	553641		exoribonuclease 1 [Source:ZFIN	Acc:ZDB-GENE-050522-39]	eri1	21	() ): :
ENSDARG00000005218	3.88	2.71	3.22	3	3.23	3.69	72.5826	-0.0114695	0.189369	0.922331	0.973231	wrnip1	405856		WRN helicase interacting protein 1 [Source:ZFIN	Acc:ZDB-GENE-040426-2415]	wrnip1	2	() ): :
ENSDARG00000032344	27.22	29.29	31.68	31.87	24.41	31.97	1617.32	-0.0100739	0.11746	0.922464	0.973231	pde4a	572061		phosphodiesterase 4A [Source:HGNC Symbol	Acc:HGNC:8780]	PDE4A	3	GO:0016787(molecular_function) ): :hydrolase activity,GO:0007165(biological_process) ): :signal transduction,GO:0046872(molecular_function) ): :metal ion binding,GO:0005829(cellular_component) ): :cytosol,GO:0005634(cellular_component) ): :nucleus,GO:0008081(molecular_function) ): :phosphoric diester hydrolase activity,GO:0048471(cellular_component) ): :perinuclear region of cytoplasm,GO:0004114(…
ENSDARG00000052429	1.28	1.52	1.12	1.3	1.57	1.06	45.9402	-0.0105272	0.207032	0.922366	0.973231	syngr2a	563028		synaptogyrin 2a [Source:ZFIN	Acc:ZDB-GENE-070112-1292]	syngr2a	3	() ): :
ENSDARG00000069230	0.56	0.19	0.41	0.52	0.32	0.37	9.64666	-0.00660889	0.233688	0.922188	0.973231	zgc:153738	558115		zgc:153738 [Source:ZFIN	Acc:ZDB-GENE-061013-622]	zgc:153738	8	GO:0005524(molecular_function) ): :ATP binding,GO:0016887(molecular_function) ): :ATP hydrolysis activity,() ): :
ENSDARG00000071026	143.77	154.35	164.33	201.65	146.92	95.43	1781.61	0.0122987	0.173265	0.922223	0.973231	mllt11	563531		MLLT11 transcription factor 7 cofactor [Source:NCBI gene (formerly Entrezgene)	Acc:563531]	mllt11	19	() ): :
ENSDARG00000076155	4.03	3.83	3.63	4.72	3.5	2.83	85.5707	0.0118422	0.192465	0.922432	0.973231	mtpap	563801		mitochondrial poly(A) polymerase [Source:HGNC Symbol	Acc:HGNC:25532]	MTPAP	12	GO:0016740(molecular_function) ): :transferase activity,GO:0005739(cellular_component) ): :mitochondrion,GO:0006378(biological_process) ): :mRNA polyadenylation,GO:1990817(molecular_function) ): :RNA adenylyltransferase activity
ENSDARG00000078201	0.24	0.25	0.54	0.37	0.39	0.31	5.51125	-0.00549855	0.237411	0.922472	0.973231	vcam1a	100001105				2	GO:0016020(cellular_component) ): :membrane,GO:0001946(biological_process) ): :lymphangiogenesis
ENSDARG00000102139	0.25	0.27	0.29	0.25	0.2	0.4	14.3314	-0.00791869	0.227739	0.922484	0.973231	LOC100007471	100007471				KN150703.1	() ): :
ENSDARG00000087319	3.87	4	5.27	3.5	4.3	5.44	175.93	-0.0116143	0.16792	0.922094	0.973199	tmem121b	796113		transmembrane protein 121B [Source:HGNC Symbol	Acc:HGNC:1844]	TMEM121B	4	() ): :
ENSDARG00000068755	7.06	8.36	11.48	9.84	7.63	8.5	68.8966	0.0117642	0.194962	0.921986	0.973149	exosc8	323016		exosome component 8 [Source:ZFIN	Acc:ZDB-GENE-030131-1736]	exosc8	10	() ): :
ENSDARG00000098694	3.1	2.29	3.76	3.31	2.38	3.16	43.1071	0.0111335	0.206417	0.922002	0.973149						14	() ): :
ENSDARG00000034808	41.23	43.3	55.56	50.51	43.73	45.15	848.097	-0.0106895	0.131439	0.921912	0.973149	kcnip1b	494089		Kv channel interacting protein 1 b [Source:ZFIN	Acc:ZDB-GENE-041212-57]	kcnip1b	10	() ): :
ENSDARG00000041619	178.36	167.53	184.65	172.2	177.36	169.06	1857.82	0.0100261	0.106396	0.921827	0.973149	rack1	30722		receptor for activated C kinase 1 [Source:ZFIN	Acc:ZDB-GENE-990415-89]	rack1	14	() ): :
ENSDARG00000092143	16.91	19.62	14.06	16.3	13.69	19.58	108.924	0.0121766	0.181569	0.921889	0.973149	ank1a	449796		ankyrin 1, erythrocytic a [Source:ZFIN	Acc:ZDB-GENE-041010-44]	ank1a	5	() ): :
ENSDARG00000021366	2.06	2.75	1.69	1.36	2.97	1.78	30.7889	0.00973071	0.220312	0.921741	0.973111	fbp1a	335231		fructose-1,6-bisphosphatase 1a [Source:ZFIN	Acc:ZDB-GENE-030131-7171]	fbp1a	5	() ): :
ENSDARG00000003797	0	0.17	0.15	0.15	0.04	0.16	4.13321	-0.0042943	0.240557	0.921091	0.973091	asb2a.1	567986				20	GO:0035556(biological_process) ): :intracellular signal transduction,GO:0006511(biological_process) ): :ubiquitin-dependent protein catabolic process,GO:0016567(biological_process) ): :protein ubiquitination,GO:0000151(cellular_component) ): :ubiquitin ligase complex,() ): :
ENSDARG00000008542	4.75	3.46	5.2	4.65	3.82	5.05	155.499	-0.0118105	0.168634	0.921505	0.973091	yod1	550411		YOD1 deubiquitinase [Source:ZFIN	Acc:ZDB-GENE-050417-217]	yod1	11	() ): :
ENSDARG00000017036	1.37	3.09	1.75	2.59	1.52	1.87	41.3938	0.00981784	0.216799	0.921676	0.973091	svilc	100006087				3	() ): :
ENSDARG00000019726	8.9	10.78	10.2	10.68	7.97	10.73	861.527	0.0111176	0.132283	0.921639	0.973091	celsr2	560426		cadherin, EGF LAG seven-pass G-type receptor 2 [Source:ZFIN	Acc:ZDB-GENE-070122-2]	celsr2	22	() ): :
ENSDARG00000020447	11.47	8.07	10.4	10.18	10.74	8.89	236.139	-0.0117099	0.162846	0.921499	0.973091	tmtc4	560605		transmembrane O-mannosyltransferase targeting cadherins 4 [Source:ZFIN	Acc:ZDB-GENE-070912-148]	tmtc4	9	() ): :
ENSDARG00000038500	10.53	9.56	9.97	13.22	9.25	7.65	107.243	-0.0118621	0.188733	0.921191	0.973091	cep41	431741		centrosomal protein 41 [Source:NCBI gene (formerly Entrezgene)	Acc:431741]	cep41	25	() ): :
ENSDARG00000040985	10.28	8.41	9.37	8.11	8.37	10.96	109.731	0.0123225	0.173917	0.921182	0.973091	itgbl1	554050		integrin, beta-like 1 [Source:ZFIN	Acc:ZDB-GENE-050522-410]	itgbl1	9	() ): :
ENSDARG00000041873	0.56	0.5	0.34	0.7	0.53	0	4.45986	0.0046804	0.240224	0.921379	0.973091	si:dkey-221h15.4	563950		si:dkey-221h15.4 [Source:ZFIN	Acc:ZDB-GENE-041014-340]	SDR16C5	20	GO:0016616(molecular_function) ): :oxidoreductase activity, acting on the CH-OH group of donors, NAD or NADP as acceptor,GO:0005811(cellular_component) ): :lipid droplet
ENSDARG00000046107	41.67	43.03	40.12	36.06	36.82	50.37	3509.33	0.0103324	0.117425	0.9214	0.973091	caskin1	563678		CASK interacting protein 1 [Source:HGNC Symbol	Acc:HGNC:20879]	CASKIN1	3	() ): :
ENSDARG00000056211	5.04	3.18	7.92	5.22	5.16	6.05	34.4252	-0.00986526	0.215574	0.921231	0.973091	ogfod2	790923		2-oxoglutarate and iron-dependent oxygenase domain containing 2 [Source:ZFIN	Acc:ZDB-GENE-061215-54]	ogfod2	5	() ): :
ENSDARG00000058252	0.14	0.2	0.1	0.17	0.02	0.23	5.90756	0.00534091	0.2387	0.921575	0.973091	LOC100001991	100001991		ADAM metallopeptidase with thrombospondin type 1 motif 8 [Source:HGNC Symbol	Acc:HGNC:224]	ADAMTS8	15	() ): :
ENSDARG00000060071	18.94	18.64	21.89	18.4	16.41	23.78	668.168	0.0108236	0.127906	0.921434	0.973091	tent4b	568678		terminal nucleotidyltransferase 4B [Source:ZFIN	Acc:ZDB-GENE-041021-2]	tent4b	7	() ): :
ENSDARG00000060564	0.81	1.25	1.15	1.52	0.96	0.81	20.0003	-0.00865444	0.224435	0.921044	0.973091	slc25a21	767694		solute carrier family 25 member 21 [Source:ZFIN	Acc:ZDB-GENE-060929-664]	slc25a21	17	() ): :
ENSDARG00000061213	14.67	14.75	16.36	13.13	15.23	17.45	460.383	-0.0107072	0.129434	0.921248	0.973091	rabep2	791143		rabaptin, RAB GTPase binding effector protein 2 [Source:ZFIN	Acc:ZDB-GENE-070112-572]	rabep2	3	() ): :
ENSDARG00000077095	13.03	13.29	17.24	15.06	12.52	15.96	1102.24	-0.010458	0.124698	0.921167	0.973091	hipk1b	572323				11	() ): :
ENSDARG00000097953	4.9	4.07	6.24	5.57	5.11	4.49	148.58	-0.0116222	0.174131	0.921577	0.973091	LOC108191330	108191330	XR_001800302	si:ch211-277g23.5 [Source:ZFIN	Acc:ZDB-LINCRNAG-030131-7938]	si:ch211-277g23.5	9	() ): :
ENSDARG00000103053	1.01	2.04	1.31	2.43	0.75	1.36	12.8301	-0.00694987	0.232516	0.921596	0.973091						14	() ): :
ENSDARG00000030967	1.29	3.84	2.83	6	1.13	0.98	88.0623	-0.00778521	0.228171	0.92088	0.973058	si:ch211-51a6.2	562156				13	() ): :,GO:0016787(molecular_function) ): :hydrolase activity,GO:0006508(biological_process) ): :proteolysis,GO:0016020(cellular_component) ): :membrane,GO:0004252(molecular_function) ): :serine-type endopeptidase activity,GO:0005886(cellular_component) ): :plasma membrane,GO:0005576(cellular_component) ): :extracellular region,GO:0008233(molecular_function) ): :peptidase activity,GO:0008236(mole…
ENSDARG00000031346	35.97	31.11	40.44	35.9	30.48	38.96	325.406	0.0115182	0.139414	0.920672	0.973058	rbm17	393889		RNA binding motif protein 17 [Source:ZFIN	Acc:ZDB-GENE-040426-817]	rbm17	4	() ): :
ENSDARG00000058259	4.08	3.79	4.42	4.25	3.37	4.45	473.676	0.0108396	0.129509	0.920797	0.973058	celsr1b	556520				25	GO:0016020(cellular_component) ): :membrane,GO:0004888(molecular_function) ): :transmembrane signaling receptor activity,GO:0005886(cellular_component) ): :plasma membrane,GO:0004930(molecular_function) ): :G protein-coupled receptor activity,GO:0007165(biological_process) ): :signal transduction,GO:0007186(biological_process) ): :G protein-coupled receptor signaling pathway,GO:0005509(molecular_…
ENSDARG00000070919	26.02	26.01	23.89	25.53	22.51	28.15	495.188	-0.0105674	0.126976	0.920862	0.973058	cpne5b	394003		copine Vb [Source:ZFIN	Acc:ZDB-GENE-040426-1398]	cpne5b	11	() ): :
ENSDARG00000071823	16.36	15.72	12.21	15.24	12.68	16.79	364.304	-0.0115854	0.151738	0.920807	0.973058	adarb2	558149		adenosine deaminase RNA specific B2 (inactive) [Source:HGNC Symbol	Acc:HGNC:227]	ADARB2	24	() ): :
ENSDARG00000092166	4.96	7.46	10.18	7.23	8.61	6.71	53.1419	-0.0107357	0.207137	0.920769	0.973058	fbxo44.9	553461				23	() ): :
ENSDARG00000097712	1.28	0.91	1.24	1.28	1.05	0.9	12.1602	0.00812912	0.229697	0.920741	0.973058	si:ch1073-443n13.2	100535735				16	() ): :
ENSDARG00000002937	1.2	0.65	0.37	0.94	0.51	0.9	12.7309	-0.00700238	0.232565	0.920317	0.973001	meis1a	170455		Meis homeobox 1 a [Source:ZFIN	Acc:ZDB-GENE-020122-3]	meis1a	1	() ): :
ENSDARG00000003290	26.58	22.53	27.44	20.86	21.8	32.7	426.717	0.0119364	0.14772	0.920469	0.973001	dab1b	678641		DAB adaptor protein 1b [Source:ZFIN	Acc:ZDB-GENE-060421-7958]	dab1b	2	() ): :
ENSDARG00000009553	112.71	112.41	128.92	127.54	115.04	109.2	1290.35	-0.0103862	0.120093	0.920251	0.973001	gng3	114462		guanine nucleotide binding protein (G protein), gamma 3 [Source:ZFIN	Acc:ZDB-GENE-010705-1]	gng3	21	GO:0016020(cellular_component) ): :membrane,GO:0005886(cellular_component) ): :plasma membrane,GO:0007165(biological_process) ): :signal transduction,GO:0007186(biological_process) ): :G protein-coupled receptor signaling pathway,GO:0005834(cellular_component) ): :heterotrimeric G-protein complex,GO:0031681(molecular_function) ): :G-protein beta-subunit binding
ENSDARG00000036094	10.27	11.87	12.16	11.5	9.68	12.47	356.586	0.0115285	0.136533	0.920205	0.973001	pias1a	564496		protein inhibitor of activated STAT 1 [Source:HGNC Symbol	Acc:HGNC:2752]	PIAS1	7	GO:0016740(molecular_function) ): :transferase activity,GO:0046872(molecular_function) ): :metal ion binding,GO:0008270(molecular_function) ): :zinc ion binding,GO:0006357(biological_process) ): :regulation of transcription by RNA polymerase II,GO:0003712(molecular_function) ): :transcription coregulator activity,GO:0016874(molecular_function) ): :ligase activity,GO:0016925(biological_process) ):…
ENSDARG00000044114	3.29	3.46	4.43	4.55	1.91	5.02	42.5625	-0.010116	0.213958	0.920494	0.973001	cyb561d2	450082		cytochrome b561 family, member D2 [Source:ZFIN	Acc:ZDB-GENE-041010-205]	cyb561d2	22	() ): :
ENSDARG00000091667	0.41	0.51	0.43	0.42	0.38	0.63	6.35167	-0.00608937	0.236051	0.920334	0.973001	si:dkey-234i14.3	100329793		si:dkey-234i14.3 [Source:ZFIN	Acc:ZDB-GENE-131121-422]	si:dkey-234i14.3	25	GO:0005509(molecular_function) ): :calcium ion binding,GO:0048856(biological_process) ): :anatomical structure development
ENSDARG00000096697	1.78	1.66	1.21	1.25	1.05	2.2	12.7397	0.0080715	0.230024	0.920511	0.973001						12	() ): :
ENSDARG00000097044	1.91	0.68	1.06	0.85	0.53	2.4	15.6159	0.00726413	0.233081	0.920381	0.973001						4	() ): :
ENSDARG00000102154	1.31	1.6	2.01	1.45	1.21	2.13	50.2336	0.011494	0.204164	0.920339	0.973001	si:dkey-262g12.10	798256				4	GO:0000977(molecular_function) ): :RNA polymerase II transcription regulatory region sequence-specific DNA binding,GO:0005634(cellular_component) ): :nucleus,GO:0006357(biological_process) ): :regulation of transcription by RNA polymerase II,GO:0000981(molecular_function) ): :DNA-binding transcription factor activity, RNA polymerase II-specific
ENSDARG00000087979	13.93	12.9	14.79	15.36	11.5	14.9	379.377	-0.0112488	0.137672	0.920096	0.97299	LOC101882239	101882239				2	() ): :
ENSDARG00000020405	5.35	4.41	5.1	4.1	5.78	5.03	71.9079	-0.0117665	0.191024	0.920048	0.972987	napab	327082		N-ethylmaleimide-sensitive factor attachment protein, alpha b [Source:ZFIN	Acc:ZDB-GENE-030131-5290]	napab	18	() ): :
ENSDARG00000021866	0.33	1.47	0.23	1.19	0.08	0.66	14.8978	0.00595795	0.237619	0.92001	0.972987	upk1a	678515		uroplakin 1a [Source:ZFIN	Acc:ZDB-GENE-060421-2603]	upk1a	16	() ): :
ENSDARG00000003632	0.22	0.54	0.26	0.45	0.21	0.29	4.24331	0.00522038	0.239199	0.919899	0.972947	cav4a	100136849		caveolin 4a [Source:ZFIN	Acc:ZDB-GENE-080204-67]	cav4a	11	() ): :
ENSDARG00000017748	2.97	3.23	2.75	2.58	2.55	3.67	200.273	0.012398	0.160684	0.919919	0.972947	arhgap29b	378998		Rho GTPase activating protein 29b [Source:ZFIN	Acc:ZDB-GENE-031010-44]	arhgap29b	2	() ): :
ENSDARG00000019907	0.31	0.25	0.84	0.76	0.29	0.2	5.35731	0.00543519	0.238809	0.919794	0.972941	dscc1	447872		DNA replication and sister chromatid cohesion 1 [Source:ZFIN	Acc:ZDB-GENE-040912-35]	dscc1	16	() ): :
ENSDARG00000070110	0.48	0.66	0.68	0.69	0.37	0.65	7.60522	0.0068484	0.234892	0.919789	0.972941	opn5	564181		opsin 5 [Source:ZFIN	Acc:ZDB-GENE-041001-179]	opn5	20	() ): :
ENSDARG00000086665	45.96	40.1	45.13	48.15	47.63	34.31	1421.26	-0.0115703	0.146779	0.919742	0.972941	si:dkey-175g6.2	793455				10	() ): :
ENSDARG00000101023	0.36	0.69	0.2	0.8	0.07	0.28	5.2481	0.00499905	0.239729	0.919824	0.972941	msx2b	30531		muscle segment homeobox 2b [Source:ZFIN	Acc:ZDB-GENE-980526-492]	msx2b	21	() ): :
ENSDARG00000098242	30.82	34.81	28.37	39.13	26.09	26.02	193.945	0.0125955	0.175261	0.919623	0.972919	brcc3	100333845		BRCA1/BRCA2-containing complex subunit 3 [Source:HGNC Symbol	Acc:HGNC:24185]	BRCC3	21	() ): :
ENSDARG00000013004	15.13	16.28	18.16	18.77	15.64	13.63	362.925	0.0123104	0.152662	0.919574	0.972914	tdg.1	553789		thymine DNA glycosylase, tandem duplicate 1 [Source:ZFIN	Acc:ZDB-GENE-050522-44]	tdg.1	25	() ): :
ENSDARG00000031228	30.99	28.07	37.32	27.82	38.5	26.54	614.184	0.0123457	0.157681	0.91936	0.972914	podxl	563365		podocalyxin-like [Source:ZFIN	Acc:ZDB-GENE-030131-2805]	podxl	4	() ): :
ENSDARG00000035415	2.7	2.67	2.52	3.2	2.35	2.47	35.7962	-0.0107329	0.209242	0.91955	0.972914	ptger4b	100005416		prostaglandin E receptor 4 (subtype EP4) b [Source:ZFIN	Acc:ZDB-GENE-060531-102]	ptger4b	5	() ): :
ENSDARG00000062476	67.3	56.6	66.23	66.08	66.45	51.26	399.635	0.0122569	0.15168	0.91943	0.972914	snapc5	492409		small nuclear RNA activating complex, polypeptide 5 [Source:ZFIN	Acc:ZDB-GENE-041111-50]	snapc5	18	() ): :
ENSDARG00000070603	111.12	83.45	97.4	83.7	106.29	94.33	1805.27	0.0114689	0.134492	0.919423	0.972914	hspa12a	751725		heat shock protein 12A [Source:ZFIN	Acc:ZDB-GENE-031001-1]	hspa12a	17	() ): :
ENSDARG00000079496	40.61	29.27	39.96	32.77	32.71	44.9	877.896	-0.0113269	0.138093	0.919556	0.972914	bicd1a	556758		BICD cargo adaptor 1 [Source:HGNC Symbol	Acc:HGNC:1049]	BICD1	18	() ): :
ENSDARG00000098209	3.79	3.62	3.93	4.09	3.77	3.05	106.878	0.0125731	0.178995	0.919517	0.972914	simc1	100150204				14	() ): :
ENSDARG00000102948	0.47	0.46	0.43	0.64	0.41	0.36	11.0178	-0.00747622	0.23121	0.919542	0.972914	crb3a	724017		crumbs homolog 3a [Source:ZFIN	Acc:ZDB-GENE-060610-2]	crb3a	3	GO:0016020(cellular_component) ): :membrane,GO:1902855(biological_process) ): :regulation of non-motile cilium assembly,GO:0042491(biological_process) ): :inner ear auditory receptor cell differentiation
ENSDARG00000002732	0.32	1.27	0.92	0.5	1.02	1.08	13.5824	-0.00718363	0.232448	0.919167	0.97291	spon2b	30202		spondin 2b, extracellular matrix protein [Source:ZFIN	Acc:ZDB-GENE-990415-161]	spon2b	14	() ): :
ENSDARG00000012072	20.02	16.23	23.73	20.04	20.4	17.35	142.276	0.0126707	0.172576	0.91919	0.97291	dmac2l	393187		distal membrane arm assembly component 2 like [Source:ZFIN	Acc:ZDB-GENE-040426-959]	dmac2l	13	() ): :
ENSDARG00000096053	2.13	1.78	0.02	0.09	1.54	2.92	52.3037	-0.00328407	0.24203	0.919209	0.97291						1	() ): :
ENSDARG00000087762	36.82	33.98	38.02	34.08	31.74	44.08	172.44	-0.0120382	0.156761	0.919006	0.972871	rab27b	561717		RAB27B, member RAS oncogene family [Source:HGNC Symbol	Acc:HGNC:9767]	RAB27B	21	() ): :,GO:0003924(molecular_function) ): :GTPase activity,GO:0005525(molecular_function) ): :GTP binding,GO:0005794(cellular_component) ): :Golgi apparatus,GO:0006887(biological_process) ): :exocytosis,GO:0070382(cellular_component) ): :exocytic vesicle,GO:0045921(biological_process) ): :positive regulation of exocytosis,GO:0005768(cellular_component) ): :endosome,GO:0005770(cellular_component) …
ENSDARG00000096417	3.33	3.04	5.83	5.19	3.07	4.18	51.6521	-0.0108361	0.208692	0.918953	0.972871						19	() ): :
ENSDARG00000098702	24.14	27.34	26.29	25.35	15.76	35.8	486.363	0.0126525	0.170755	0.919038	0.972871	zgc:165603	571425		zgc:165603 [Source:ZFIN	Acc:ZDB-GENE-070620-21]	zgc:165603	2	GO:0003676(molecular_function) ): :nucleic acid binding,GO:0003723(molecular_function) ): :RNA binding
ENSDARG00000100290	2.46	2.62	1.98	2.04	1.46	3.96	24.6365	-0.00917812	0.222585	0.919013	0.972871	sphk1	100331840		sphingosine kinase 1 [Source:HGNC Symbol	Acc:HGNC:11240]	SPHK1	KN149912.1	() ): :
ENSDARG00000056213	4.01	3.83	6.23	5.17	4.64	4.47	27.2133	-0.0100392	0.216786	0.91883	0.972842	si:ch73-130a3.4	664763		si:ch73-130a3.4 [Source:ZFIN	Acc:ZDB-GENE-141219-41]	si:ch73-130a3.4	19	() ): :
ENSDARG00000073784	25.21	20.1	16.62	17.46	20.29	24.92	236.176	-0.0122183	0.168175	0.918765	0.972835	fez2a	100334565		fasciculation and elongation protein zeta 2 [Source:HGNC Symbol	Acc:HGNC:3660]	FEZ2	16	() ): :
ENSDARG00000096718	3.69	3.21	4.87	4.99	3.14	3.96	22.1836	-0.00949816	0.220861	0.918779	0.972835						20	() ): :
ENSDARG00000105254	11.84	6.25	4.91	8.84	5.27	8.05	28.7475	0.00983995	0.221907	0.918642	0.972785	LOC101885697	101885697				KN150561.1	() ): :
ENSDARG00000006889	6.27	6.85	5.83	5.55	4.87	8.26	151.634	0.0127732	0.173585	0.918393	0.972611	mpped2a	550430		metallophosphoesterase domain containing 2a [Source:ZFIN	Acc:ZDB-GENE-050417-241]	mpped2a	7	() ): :
ENSDARG00000045159	2.66	2.14	3.69	2.92	2.41	2.78	27.6878	0.0106615	0.216204	0.918226	0.972611	zdhhc4	561817		zinc finger DHHC-type palmitoyltransferase 4 [Source:ZFIN	Acc:ZDB-GENE-030131-9031]	zdhhc4	12	() ): :
ENSDARG00000063917	1406.47	2155.37	1546.78	2211.49	1764.74	1124.84	21051.1	-0.013716	0.17661	0.918432	0.972611	ND4	140534	NP_059340	NADH dehydrogenase 4, mitochondrial [Source:ZFIN	Acc:ZDB-GENE-011205-10]	mt-nd4	MT	() ): :
ENSDARG00000069904	1.49	1.51	1.57	1.23	0.93	2.62	50.9145	-0.0106721	0.211687	0.918349	0.972611	col24a1	101883924				23	() ): :
ENSDARG00000099038	3.78	6.14	5.96	7.84	3.89	4.32	118.497	-0.0115523	0.200002	0.918206	0.972611	kcng1	796774		potassium voltage-gated channel, subfamily G, member 1 [Source:ZFIN	Acc:ZDB-GENE-080220-5]	kcng1	23	() ): :
ENSDARG00000102156	0.34	0.36	0.2	0.34	0.32	0.32	7.70009	-0.00665463	0.234754	0.918291	0.972611						4	() ): :
ENSDARG00000110852	2.93	2.24	2.7	3.86	2.06	2.05	58.9867	-0.0111136	0.206386	0.91837	0.972611						4	() ): :
ENSDARG00000012829	0.51	0.33	0.59	0.59	0.35	0.54	13.2476	-0.00811111	0.229179	0.917855	0.972508	asah2	493602		N-acylsphingosine amidohydrolase 2 [Source:NCBI gene (formerly Entrezgene)	Acc:493602]	asah2	12	() ): :
ENSDARG00000020000	6.41	6.83	5.79	6.95	5.29	6.38	247.165	0.0125108	0.154004	0.917998	0.972508	sh3bp4a	403082		SH3-domain binding protein 4a [Source:NCBI gene (formerly Entrezgene)	Acc:403082]	sh3bp4a	22	() ): :
ENSDARG00000045540	27.82	24.52	26.01	25.74	24.17	28.39	1105.87	-0.00980216	0.10703	0.917891	0.972508	ppp6r2a	560729		protein phosphatase 6, regulatory subunit 2a [Source:ZFIN	Acc:ZDB-GENE-030131-5428]	ppp6r2a	4	() ): :
ENSDARG00000053773	0.8	0.85	0.48	0.74	0.56	0.7	9.73315	0.00765126	0.232681	0.917984	0.972508	vgll2b	606659		vestigial-like family member 2b [Source:ZFIN	Acc:ZDB-GENE-050809-113]	vgll2b	17	() ): :
ENSDARG00000103826	2.19	3.35	2.37	0.65	2.07	5.04	46.1102	0.00924557	0.226081	0.918019	0.972508	gpib	246095		glucose-6-phosphate isomerase b [Source:ZFIN	Acc:ZDB-GENE-020513-3]	gpib	18	() ): :
ENSDARG00000045402	15.14	15.63	14.44	17.41	11.52	15.08	82.8918	0.0127073	0.186822	0.917748	0.972458	commd3	494135		COMM domain containing 3 [Source:ZFIN	Acc:ZDB-GENE-041219-3]	commd3	24	() ): :
ENSDARG00000004270	5.93	5.3	6.66	5.68	6.58	5.6	125.736	-0.012435	0.171296	0.917495	0.972328	atl3	449995		atlastin 3 [Source:ZFIN	Acc:ZDB-GENE-041010-109]	atl3	14	() ): :
ENSDARG00000067805	45.5	46.26	59.98	40.33	52.54	54.99	525.57	0.0122547	0.14334	0.917501	0.972328				gamma-glutamyl carboxylase [Source:HGNC Symbol	Acc:HGNC:4247]	GGCX	10	() ): :
ENSDARG00000070972	1.68	1.05	1.25	2.21	0.74	0.78	12.2375	0.00768946	0.23268	0.917571	0.972328	si:ch211-81a5.8	560648		si:ch211-81a5.8 [Source:ZFIN	Acc:ZDB-GENE-060503-138]	si:ch211-81a5.8	19	GO:0000149(molecular_function) ): :SNARE binding,GO:0031201(cellular_component) ): :SNARE complex,GO:0006836(biological_process) ): :neurotransmitter transport,GO:0045202(cellular_component) ): :synapse,GO:0006887(biological_process) ): :exocytosis,GO:0046928(biological_process) ): :regulation of neurotransmitter secretion,GO:0019905(molecular_function) ): :syntaxin binding,GO:0016079(biological_…
ENSDARG00000079129	0.06	1.03	0.52	1.52	0	0.25	8.29542	-0.00421893	0.24089	0.917457	0.972328	opn4xa	100331502		opsin 4xa [Source:ZFIN	Acc:ZDB-GENE-110622-1]	opn4xa	10	() ): :
ENSDARG00000079731	9.7	9.62	8.66	8.7	8.42	10.43	986.055	0.0108161	0.117395	0.917493	0.972328	kif13ba	571520		kinesin family member 13B [Source:HGNC Symbol	Acc:HGNC:14405]	KIF13B	17	GO:0005737(cellular_component) ): :cytoplasm,GO:0005856(cellular_component) ): :cytoskeleton,GO:0005524(molecular_function) ): :ATP binding,GO:0000166(molecular_function) ): :nucleotide binding,GO:0016887(molecular_function) ): :ATP hydrolysis activity,GO:0007018(biological_process) ): :microtubule-based movement,GO:0008017(molecular_function) ): :microtubule binding,GO:0005874(cellular_component…
ENSDARG00000100307	2.77	2.65	2.49	2.28	2.53	2.87	71.5488	0.0127375	0.186816	0.91758	0.972328	adamts5	565053		ADAM metallopeptidase with thrombospondin type 1 motif 5 [Source:NCBI gene (formerly Entrezgene)	Acc:565053]	adamts5	1	() ): :
ENSDARG00000113737	11.07	14.04	15.19	14.95	7.94	16.65	149.819	0.0127757	0.187233	0.917481	0.972328						14	() ): :
ENSDARG00000013221	8.85	7.17	8.32	7.29	8.09	8.99	368.961	-0.0118418	0.136186	0.91712	0.97229	pde4ca	565259				2	() ): :
ENSDARG00000037042	38.84	35.57	32.98	27.07	33.58	45.16	1102.62	0.0123178	0.143846	0.917229	0.97229	ddhd1b	570320		DDHD domain containing 1b [Source:ZFIN	Acc:ZDB-GENE-040724-18]	ddhd1b	20	() ): :
ENSDARG00000097013	0.79	1.68	2.91	1.03	1.35	2.81	24.414	0.00894736	0.22783	0.917196	0.97229						23	() ): :
ENSDARG00000101616	44.72	39.66	44.24	52.92	42.86	32.19	434.436	-0.0124322	0.163688	0.917086	0.97229	arfgap1	100149572		ADP-ribosylation factor GTPase activating protein 1 [Source:ZFIN	Acc:ZDB-GENE-041114-130]	arfgap1	11	() ): :
ENSDARG00000103682	5.03	6.33	4.91	8.81	3.56	3.01	30.1854	0.00978596	0.223365	0.917172	0.97229	si:dkey-23i12.5	325112	NR_120316	si:dkey-23i12.5 [Source:NCBI gene (formerly Entrezgene)	Acc:325112]	si:dkey-23i12.5	7	() ): :
ENSDARG00000045563	12.6	13	14.41	11.96	13.42	13.6	284.265	0.0122172	0.139121	0.916915	0.972195	washc3	393142		WASH complex subunit 3 [Source:ZFIN	Acc:ZDB-GENE-040426-783]	washc3	4	() ): :
ENSDARG00000063330	33.23	34.11	34.78	36.57	24.77	39.21	1268.47	0.011959	0.135181	0.916795	0.972139	mgat4a	563038		alpha-1,3-mannosyl-glycoprotein 4-beta-N-acetylglucosaminyltransferase A [Source:HGNC Symbol	Acc:HGNC:7047]	MGAT4A	9	() ): :,GO:0016020(cellular_component) ): :membrane,GO:0008375(molecular_function) ): :acetylglucosaminyltransferase activity,GO:0016740(molecular_function) ): :transferase activity,GO:0046872(molecular_function) ): :metal ion binding,GO:0005576(cellular_component) ): :extracellular region,GO:0005783(cellular_component) ): :endoplasmic reticulum,GO:0006487(biological_process) ): :protein N-linked…
ENSDARG00000099579	5.44	5.42	5.75	5.17	5.44	5.59	253.778	0.0121487	0.13971	0.916817	0.972139	aldh18a1	557186		aldehyde dehydrogenase 18 family, member A1 [Source:ZFIN	Acc:ZDB-GENE-030131-5602]	aldh18a1	12	() ): :
ENSDARG00000079502	1.16	1.22	1.35	1.59	0.88	1.13	31.738	0.0110841	0.214325	0.91671	0.972121	gal3st2	556126		galactose-3-O-sulfotransferase 2 [Source:HGNC Symbol	Acc:HGNC:24869]	GAL3ST2	15	GO:0016020(cellular_component) ): :membrane,GO:0001733(molecular_function) ): :galactosylceramide sulfotransferase activity,GO:0009247(biological_process) ): :glycolipid biosynthetic process,GO:0050694(molecular_function) ): :galactose 3-O-sulfotransferase activity
ENSDARG00000095212	0.67	0.58	0.39	0	0.49	1.06	14.1736	0.00644993	0.237016	0.916684	0.972121	si:ch211-210b2.4	100535908				15	GO:0090314(biological_process) ): :positive regulation of protein targeting to membrane,GO:0005886(cellular_component) ): :plasma membrane,GO:0044325(molecular_function) ): :transmembrane transporter binding,() ): :
ENSDARG00000014532	15.35	16.98	19.53	18.58	18.2	14.84	250.094	-0.012507	0.158043	0.916274	0.971958	aida	393763		axin interactor, dorsalization associated [Source:NCBI gene (formerly Entrezgene)	Acc:393763]	aida	20	() ): :
ENSDARG00000016311	16.59	12.99	13.59	12.09	12.73	17.69	1089.27	0.0121672	0.137306	0.916168	0.971958	dock9b	100151488				6	() ): :,GO:0005085(molecular_function) ): :guanyl-nucleotide exchange factor activity,GO:0007264(biological_process) ): :small GTPase mediated signal transduction
ENSDARG00000020984	4.06	3.62	4.24	3.89	2.78	5.61	78.5104	-0.0122249	0.193764	0.916135	0.971958	slc16a10	566499		solute carrier family 16 member 10 [Source:ZFIN	Acc:ZDB-GENE-040724-214]	slc16a10	20	() ): :
ENSDARG00000021209	4.27	5.98	4.84	3.21	4.6	6.86	57.3388	0.0119141	0.205067	0.916425	0.971958	kctd9a	541442		potassium channel tetramerization domain containing 9a [Source:ZFIN	Acc:ZDB-GENE-050320-147]	kctd9a	8	() ): :
ENSDARG00000022303	60.62	57.36	79.28	79.48	58.38	52.62	743.307	0.0128879	0.157184	0.916411	0.971958	higd1a	373084		HIG1 hypoxia inducible domain family, member 1A [Source:ZFIN	Acc:ZDB-GENE-030826-15]	higd1a	2	() ): :
ENSDARG00000037362	1.75	1.8	1.51	1.2	2.32	1.27	65.9801	0.0119149	0.206143	0.916399	0.971958	scube2	503728		signal peptide, CUB domain, EGF-like 2 [Source:NCBI gene (formerly Entrezgene)	Acc:503728]	scube2	7	() ): :
ENSDARG00000052769	49.69	52.97	73.11	60.08	59.04	50.85	1177.57	0.0124303	0.143502	0.916415	0.971958	glrbb	445193		glycine receptor, beta b [Source:ZFIN	Acc:ZDB-GENE-040801-106]	glrbb	14	() ): :
ENSDARG00000067537	0.08	0.12	0.09	0.12	0.05	0.11	5.08127	0.00596495	0.237996	0.916209	0.971958	pcsk5a	571235				5	() ): :
ENSDARG00000101110	27.54	23.28	17.29	16.92	29.54	21.87	27.7593	-0.00999782	0.21934	0.916466	0.971958	LOC103909737	103909737		LYR motif containing 4 [Source:HGNC Symbol	Acc:HGNC:21365]	LYRM4	24	() ): :
ENSDARG00000117375	4.9	4.22	8.03	5.25	6.86	5.26	12.9981	-0.00820473	0.229649	0.91613	0.971958						8	() ): :
ENSDARG00000021172	0.63	2.4	0.33	0.33	1.24	2.39	16.12	-0.00603258	0.236711	0.915495	0.971881	cyp2ad2	259306		cytochrome P450, family 2, subfamily AD, polypeptide 2 [Source:ZFIN	Acc:ZDB-GENE-020812-2]	cyp2ad2	20	() ): :
ENSDARG00000021590	23.1	22.08	21.01	20.96	19.92	25.54	1455.78	-0.0109415	0.111201	0.915906	0.971881	magi2a	564112		membrane associated guanylate kinase, WW and PDZ domain containing 2a [Source:ZFIN	Acc:ZDB-GENE-050810-4]	magi2a	4	() ): :
ENSDARG00000027825	15.64	14.91	17.72	17.46	19.42	11.03	301.949	-0.0127188	0.175857	0.915694	0.971881	naa50	445229		N-alpha-acetyltransferase 50, NatE catalytic subunit [Source:ZFIN	Acc:ZDB-GENE-040801-142]	naa50	24	() ): :
ENSDARG00000061061	3.37	4.22	4.19	3.79	4.96	3.04	44.8656	-0.0114039	0.207911	0.915859	0.971881	dpagt1	566539		dolichyl-phosphate (UDP-N-acetylglucosamine) N-acetylglucosaminephosphotransferase 1 (GlcNAc-1-P transferase) [Source:ZFIN	Acc:ZDB-GENE-060526-18]	dpagt1	5	() ): :
ENSDARG00000068892	1.1	0.5	0.86	0.78	0.52	1.04	9.4344	0.0076526	0.233443	0.915636	0.971881	sostdc1a	550261		sclerostin domain containing 1a [Source:ZFIN	Acc:ZDB-GENE-050417-64]	sostdc1a	15	GO:0005576(cellular_component) ): :extracellular region,GO:0005615(cellular_component) ): :extracellular space,GO:0030178(biological_process) ): :negative regulation of Wnt signaling pathway,GO:0030514(biological_process) ): :negative regulation of BMP signaling pathway,GO:0036122(molecular_function) ): :BMP binding
ENSDARG00000073765	3.77	3.52	4.48	3.11	4.3	3.86	58.8952	0.0127494	0.196227	0.915944	0.971881	gna13a	326825		guanine nucleotide binding protein (G protein), alpha 13a [Source:ZFIN	Acc:ZDB-GENE-030131-5024]	gna13a	12	() ): :
ENSDARG00000078185	25.99	18.57	17.64	18.59	21.05	21.02	526.305	0.0129685	0.15272	0.915697	0.971881	pacs2	794778		phosphofurin acidic cluster sorting protein 2 [Source:ZFIN	Acc:ZDB-GENE-081218-1]	pacs2	13	() ): :
ENSDARG00000090629	1.13	0.45	0.38	0.83	0.29	0.69	4.82791	0.00554513	0.239007	0.915587	0.971881	tmtops3b	102031126		teleost multiple tissue opsin 3b [Source:ZFIN	Acc:ZDB-GENE-091204-311]	tmtops3b	10	() ): :
ENSDARG00000093058	10.04	12.19	14.16	9.91	16.11	10.18	141.259	-0.0125269	0.187672	0.915529	0.971881	stmp1	100170826		short transmembrane mitochondrial protein 1 [Source:NCBI gene (formerly Entrezgene)	Acc:100170826]	stmp1	4	() ): :
ENSDARG00000093960	0.81	1.46	0.48	0.39	1.74	0.7	5.12378	-0.00520192	0.239213	0.91572	0.971881	si:dkey-111e8.5	566993		si:dkey-111e8.5 [Source:ZFIN	Acc:ZDB-GENE-060526-192]	si:dkey-111e8.5	5	() ): :
ENSDARG00000097025	0.7	0.68	0.42	0.37	0.54	0.77	15.5003	0.00898977	0.227934	0.915507	0.971881						21	() ): :
ENSDARG00000099680	1.42	0	3.16	0.73	0	3.5	8.1176	0.00443808	0.241376	0.915444	0.971881						14	() ): :
ENSDARG00000103160	0.92	0.65	1.88	1.48	1.14	1	7.3101	-0.00649964	0.235918	0.915821	0.971881						22	() ): :
ENSDARG00000105292	0.8	1.36	1.02	1.34	0.74	1.25	16.2301	-0.00874708	0.227226	0.915492	0.971881	si:ch73-112j3.1	101883515	XR_221948			11	() ): :
ENSDARG00000107526	1.45	3.05	4.98	3.93	1.61	3.39	9.90828	0.00734473	0.234435	0.915895	0.971881	smkr1	103910385		small lysine rich protein 1 [Source:NCBI gene (formerly Entrezgene)	Acc:103910385]	smkr1	4	() ): :
ENSDARG00000093650	4.15	7.6	11.59	1.39	9.16	11.45	24.8039	0.00826315	0.231652	0.915269	0.97188						24	() ): :
ENSDARG00000006029	7.74	8.57	8.09	9.45	7.57	7.53	143.906	-0.0127852	0.168376	0.915222	0.971878	lta4h	406575		leukotriene A4 hydrolase [Source:ZFIN	Acc:ZDB-GENE-040426-2477]	lta4h	4	() ): :
ENSDARG00000016483	1.04	0.99	0.8	0.41	1.28	0.91	14.6269	0.00869539	0.229828	0.915109	0.971878	baiap2l2a	394210				3	GO:0005654(cellular_component) ): :nucleoplasm,GO:0005829(cellular_component) ): :cytosol,GO:0051017(biological_process) ): :actin filament bundle assembly,GO:0007009(biological_process) ): :plasma membrane organization,GO:0030838(biological_process) ): :positive regulation of actin filament polymerization,GO:0051764(biological_process) ): :actin crosslink formation,() ): :
ENSDARG00000093687	11.95	10.77	13.11	11.17	13.17	10.13	168.78	0.0132584	0.166879	0.915187	0.971878	si:dkey-193c22.1	567837		si:dkey-193c22.1 [Source:ZFIN	Acc:ZDB-GENE-030131-7957]	si:dkey-193c22.1	5	() ): :
ENSDARG00000096800	2.56	2.71	2.11	2.88	2.17	1.83	9.6478	0.00795424	0.232554	0.915149	0.971878						12	() ): :
ENSDARG00000022512	4.45	4.94	6.59	7.53	1.48	7.95	33.6616	-0.00895051	0.226183	0.915042	0.971878	zgc:109913	553549		zgc:109913 [Source:ZFIN	Acc:ZDB-GENE-050522-72]	zgc:109913	6	() ): :
ENSDARG00000095955	1.73	1.01	2.44	1.15	1.49	2.86	23.6817	-0.0093352	0.224628	0.914804	0.971673						6	() ): :
ENSDARG00000059581	6.03	7.15	6.97	6.21	5.06	8.57	216.098	0.013265	0.163571	0.914634	0.971563				methyl-CpG binding domain protein 5 [Source:HGNC Symbol	Acc:HGNC:20444]	MBD5	6	() ): :
ENSDARG00000095062	1.27	2.03	1.63	2.05	1.82	1.22	10.4532	-0.00767925	0.232266	0.914656	0.971563						16	() ): :
ENSDARG00000046072	8.99	7.14	10.96	8.84	6.92	10.59	61.7992	0.0131	0.196436	0.914482	0.971499	snx16	402964		sorting nexin 16 [Source:ZFIN	Acc:ZDB-GENE-040426-1832]	snx16	24	() ): :
ENSDARG00000075671	0.35	0.29	0.5	0.98	0	0.26	9.43282	-0.00524975	0.23932	0.914505	0.971499	tlr4al	795671		toll-like receptor 4a, like [Source:ZFIN	Acc:ZDB-GENE-090507-2]	tlr4al	13	() ): :
ENSDARG00000078065	5.57	6.1	6.89	4.6	8.49	5.59	31.5288	-0.0107693	0.215972	0.91401	0.971069						2	() ): :
ENSDARG00000004576	0.48	0.67	0.88	0.85	0.51	0.57	21.6204	0.010201	0.222987	0.913894	0.971028	plk4	368390		polo-like kinase 4 (Drosophila) [Source:ZFIN	Acc:ZDB-GENE-030619-14]	plk4	17	() ): :
ENSDARG00000019060	31.96	35.26	36.84	36.32	34.8	29.92	809.748	0.0106803	0.133197	0.913802	0.971028	snx12	394098		sorting nexin 12 [Source:ZFIN	Acc:ZDB-GENE-040426-787]	snx12	21	() ): :
ENSDARG00000044001	3.93	3.56	3.41	2.71	3.42	5.04	56.5208	-0.0122594	0.200371	0.913548	0.971028	lgals3b	325599		lectin, galactoside binding soluble 3b [Source:ZFIN	Acc:ZDB-GENE-030131-4324]	lgals3b	17	() ): :
ENSDARG00000052575	0.3	0.27	0.32	0.25	0.23	0.34	4.84356	0.00619572	0.237917	0.913898	0.971028	arl13a	793658		ADP-ribosylation factor-like 13A [Source:ZFIN	Acc:ZDB-GENE-040426-1790]	arl13a	14	() ): :
ENSDARG00000059388	37.97	30.25	31.63	28.98	32.43	36.19	340.699	0.0128797	0.143107	0.913674	0.971028	bdh1	100037356		3-hydroxybutyrate dehydrogenase, type 1 [Source:ZFIN	Acc:ZDB-GENE-070410-130]	bdh1	24	() ): :
ENSDARG00000076070	12.36	12.44	12.16	11.67	7.53	17.36	358.914	0.0134881	0.173796	0.91382	0.971028	LOC110437706	110437706		DLG associated protein 2 [Source:HGNC Symbol	Acc:HGNC:2906]	DLGAP2	20	() ): :
ENSDARG00000088301	0.79	1.16	0.34	0.61	1.32	0.16	27.9303	0.00816715	0.232617	0.91358	0.971028						4	() ): :
ENSDARG00000091833	3.03	2.04	3.23	2.53	2.2	3.3	44.2319	0.0123239	0.205769	0.913927	0.971028	sv2	570651				25	() ): :,GO:0016020(cellular_component) ): :membrane,GO:0055085(biological_process) ): :transmembrane transport,GO:0022857(molecular_function) ): :transmembrane transporter activity
ENSDARG00000091835	1.63	1.02	1.7	1.51	2.04	0.95	14.0052	-0.0082773	0.230085	0.913924	0.971028	si:ch73-264p11.1	100000923		si:ch73-264p11.1 [Source:ZFIN	Acc:ZDB-GENE-120703-35]	si:ch73-264p11.1	24	() ): :
ENSDARG00000098293	7.96	14.93	11.41	5.28	15.38	11.89	56.6726	0.0113273	0.215923	0.913678	0.971028	si:dkey-27i16.2	100005903		si:dkey-27i16.2 [Source:ZFIN	Acc:ZDB-GENE-030131-9667]	si:dkey-27i16.2	14	GO:0051726(biological_process) ): :regulation of cell cycle
ENSDARG00000103186	4.31	4.56	5.78	6.08	4.26	3.76	107.056	0.0133019	0.187789	0.913649	0.971028	si:ch73-389k6.1	327369				4	() ): :
ENSDARG00000104316	4.09	4.88	5.01	3.73	5.93	4.37	55.5588	-0.0121735	0.201866	0.913645	0.971028	spats2	791699				KN149997.1	() ): :
ENSDARG00000017928	1.9	1.8	1.17	1.09	1.8	1.63	16.7097	0.00959312	0.226614	0.913322	0.97102	xrcc3	541414		X-ray repair complementing defective repair in Chinese hamster cells 3 [Source:ZFIN	Acc:ZDB-GENE-050320-116]	xrcc3	20	() ): :
ENSDARG00000020473	3.24	2.78	3.01	3.37	3.43	1.61	25.9947	0.0105963	0.221175	0.913363	0.97102	hddc3	550533		HD domain containing 3 [Source:ZFIN	Acc:ZDB-GENE-050417-377]	hddc3	7	() ): :
ENSDARG00000071298	2.13	1.66	1.94	2.66	0.98	1.88	26.9948	0.0105473	0.22138	0.913381	0.97102	chrm3b	100149598		cholinergic receptor muscarinic 3 [Source:HGNC Symbol	Acc:HGNC:1952]	CHRM3	12	GO:0071881(biological_process) ): :adenylate cyclase-inhibiting adrenergic receptor signaling pathway,GO:0004938(molecular_function) ): :alpha2-adrenergic receptor activity,GO:0016020(cellular_component) ): :membrane,GO:0007268(biological_process) ): :chemical synaptic transmission,GO:0005886(cellular_component) ): :plasma membrane,GO:0045202(cellular_component) ): :synapse,GO:0004930(molecular_f…
ENSDARG00000103093	8.65	7.02	9.02	6.4	10.4	6.52	51.7284	0.0124153	0.205823	0.913364	0.97102	alg14	450072		ALG14 UDP-N-acetylglucosaminyltransferase subunit [Source:ZFIN	Acc:ZDB-GENE-041010-195]	alg14	24	() ): :
ENSDARG00000017115	13.42	14.83	20.51	13.54	16.93	18.31	239.293	-0.0130359	0.163161	0.913183	0.971001	kctd10	406787		potassium channel tetramerization domain containing 10 [Source:ZFIN	Acc:ZDB-GENE-040426-2843]	kctd10	5	() ): :
ENSDARG00000060434	66.85	63.19	67.36	56.16	77.39	62.93	6605.51	-0.00854068	0.130786	0.913154	0.971001	map1b	559032		microtubule-associated protein 1B [Source:ZFIN	Acc:ZDB-GENE-130530-690]	map1b	5	GO:0045202(cellular_component) ): :synapse,GO:0005829(cellular_component) ): :cytosol,GO:0003779(molecular_function) ): :actin binding,GO:0030425(cellular_component) ): :dendrite,GO:0007409(biological_process) ): :axonogenesis,GO:0000226(biological_process) ): :microtubule cytoskeleton organization,GO:0016358(biological_process) ): :dendrite development,GO:0008017(molecular_function) ): :microtub…
ENSDARG00000031214	23.84	23.37	29.18	26.19	26.54	23.15	638.531	-0.0124449	0.134407	0.913051	0.970967	arcn1b	399661		archain 1b [Source:ZFIN	Acc:ZDB-GENE-040121-7]	arcn1b	15	() ): :
ENSDARG00000035890	5.49	4.99	5.92	6.27	5.83	4.25	90.3117	-0.0129127	0.187778	0.913054	0.970967	fuca1.1	335494		alpha-L-fucosidase 1, tandem duplicate 1 [Source:ZFIN	Acc:ZDB-GENE-030131-7434]	fuca1.1	19	() ): :
ENSDARG00000061520	0.83	2.44	1.12	1.47	1.32	1.29	17.7444	0.00914155	0.22871	0.913061	0.970967	b4galnt1a	558684		beta-1,4-N-acetyl-galactosaminyl transferase 1a [Source:ZFIN	Acc:ZDB-GENE-070112-1462]	b4galnt1a	23	() ): :
ENSDARG00000113820	0.27	0.87	0.15	0	1.28	0.07	7.8324	-0.00443614	0.240986	0.912942	0.970967	cyp46a1.4	393451		cytochrome P450, family 46, subfamily A, polypeptide 1, tandem duplicate 4 [Source:ZFIN	Acc:ZDB-GENE-040426-1224]	cyp46a1.4	20	() ): :
ENSDARG00000102645	26.41	24.09	23.75	24.43	22.6	25.87	1310.98	0.010765	0.107918	0.912702	0.970776	usp47	100101645		ubiquitin specific peptidase 47 [Source:ZFIN	Acc:ZDB-GENE-070719-7]	usp47	7	() ): :
ENSDARG00000034988	0.94	0.95	0.42	0.53	0.43	1.61	8.16646	-0.0064788	0.236445	0.912546	0.97076	asb4	550321		ankyrin repeat and SOCS box containing 4 [Source:ZFIN	Acc:ZDB-GENE-050417-100]	asb4	19	() ): :
ENSDARG00000045051	9.93	11.16	13.01	18	8.46	6.04	237.797	0.0128598	0.202239	0.912595	0.97076	slc16a3b	327276		solute carrier family 16 member 3b [Source:ZFIN	Acc:ZDB-GENE-030131-5487]	slc16a3b	12	() ): :
ENSDARG00000052288	3.97	2.78	3.48	0.1	2.12	7.38	144.083	0.0054971	0.240228	0.912613	0.97076	zmp:0000000634	100536291				6	GO:0005634(cellular_component) ): :nucleus,GO:0016787(molecular_function) ): :hydrolase activity,GO:0016020(cellular_component) ): :membrane,GO:0046872(molecular_function) ): :metal ion binding,GO:0004518(molecular_function) ): :nuclease activity
ENSDARG00000090228	4.55	3.8	6.26	6.58	4.74	2.27	34.6098	0.0108186	0.220605	0.912468	0.97076	gsta.1	406703		glutathione S-transferase, alpha tandem duplicate 1 [Source:NCBI gene (formerly Entrezgene)	Acc:406703]		13	() ): :
ENSDARG00000095397	4.36	3.17	3.33	2.07	3.41	6.1	10.4469	-0.00776082	0.232676	0.912642	0.97076						22	() ): :
ENSDARG00000099646	7.21	6.5	7.11	7.83	6.33	6.71	307.242	-0.0125485	0.142782	0.912506	0.97076	pcdh1g3	553987		protocadherin 1 gamma 3 [Source:ZFIN	Acc:ZDB-GENE-050608-3]	pcdh1g3	10	() ): :
ENSDARG00000040803	6.53	6.64	7.18	6.27	5.55	8.89	135.161	-0.0131923	0.170719	0.912245	0.970663	lactb	553619		lactamase, beta [Source:ZFIN	Acc:ZDB-GENE-020111-1]	lactb	25	() ): :
ENSDARG00000044199	1.66	0.32	1.1	1.01	0.29	2.07	19.4876	-0.00737929	0.233844	0.912233	0.970663	gnat1	140428		guanine nucleotide binding protein (G protein), alpha transducing activity polypeptide 1 [Source:ZFIN	Acc:ZDB-GENE-011128-11]	gnat1	6	() ): :
ENSDARG00000077327	50.4	51.25	55.45	45.19	48.52	64.29	686.596	-0.0120591	0.126604	0.912192	0.970663	ano11	100007289				23	() ): :
ENSDARG00000096569	2.24	2.19	5.93	2.56	3.7	3.39	18.0596	0.0093951	0.228166	0.912281	0.970663						20	() ): :
ENSDARG00000037066	12.49	13.13	13.59	11.61	13.18	13.22	118.511	0.0137512	0.16834	0.912035	0.970592	lgals8a	563573		galectin 8 [Source:HGNC Symbol	Acc:HGNC:6569]	LGALS8	20	GO:0005737(cellular_component) ): :cytoplasm,GO:0030246(molecular_function) ): :carbohydrate binding
ENSDARG00000006397	135.6	153.06	173.71	164.68	160.18	134.49	1673.23	-0.0121925	0.133401	0.911747	0.970438	laptm4a	100003844		lysosomal protein transmembrane 4 alpha [Source:ZFIN	Acc:ZDB-GENE-030131-1024]	laptm4a	20	() ): :
ENSDARG00000057531	11.31	11.06	11.56	9.01	10.97	14.38	155.111	-0.0133077	0.166783	0.911802	0.970438	pgap3	100136873		post-GPI attachment to proteins phospholipase 3 [Source:ZFIN	Acc:ZDB-GENE-080204-27]	pgap3	12	() ): :
ENSDARG00000086184	36.14	30.45	40.33	39.24	30.34	37.96	224.658	-0.0130355	0.153735	0.911795	0.970438	fbxo48	103908695		F-box protein 48 [Source:ZFIN	Acc:ZDB-GENE-121214-308]	fbxo48	1	GO:0016567(biological_process) ): :protein ubiquitination,GO:0019005(cellular_component) ): :SCF ubiquitin ligase complex,GO:0031146(biological_process) ): :SCF-dependent proteasomal ubiquitin-dependent protein catabolic process
ENSDARG00000110654	5.58	3.85	5.86	4.58	4.06	6.92	192.944	-0.0133942	0.174925	0.911834	0.970438	wdr21	393674		WD repeat domain 21 [Source:ZFIN	Acc:ZDB-GENE-040109-2]	wdr21	20	() ): :
ENSDARG00000113526	7.52	5.33	6.26	5.6	9.13	2.75	43.2884	0.0110746	0.219498	0.911845	0.970438						4	() ): :
ENSDARG00000038222	2.48	2.39	2.78	2.62	2.51	2.25	33.525	0.0122633	0.209974	0.911609	0.970426	tyw3	436884		tRNA-yW synthesizing protein 3 homolog (S. cerevisiae) [Source:ZFIN	Acc:ZDB-GENE-040718-355]	tyw3	2	() ): :
ENSDARG00000055825	20.91	22.33	19.22	19.73	14.64	27.4	901.433	0.0134887	0.152956	0.911541	0.970406	celsr3	100008568		cadherin EGF LAG seven-pass G-type receptor 3 [Source:HGNC Symbol	Acc:HGNC:3230]	CELSR3	8	() ): :
ENSDARG00000059083	6.53	7.98	7.81	6.9	6.57	8.38	251.32	0.0132079	0.147271	0.911545	0.970406	ppp2r5ca	100005981		protein phosphatase 2 regulatory subunit B'gamma [Source:HGNC Symbol	Acc:HGNC:9311]	PPP2R5C	17	GO:0007165(biological_process) ): :signal transduction,GO:0005829(cellular_component) ): :cytosol,GO:0005634(cellular_component) ): :nucleus,GO:0019888(molecular_function) ): :protein phosphatase regulator activity,GO:0000159(cellular_component) ): :protein phosphatase type 2A complex,GO:0072542(molecular_function) ): :protein phosphatase activator activity
ENSDARG00000044968	6.9	6.61	7.31	7.58	5.66	7.15	252.287	0.0132417	0.147414	0.911435	0.970383	vcla	552980		vinculin a [Source:ZFIN	Acc:ZDB-GENE-050506-61]	vcla	13	() ): :
ENSDARG00000086169	5.17	4.05	5.1	4.32	5.18	4.92	70.8902	-0.0131569	0.188954	0.91136	0.970351	rskrb	100537227				21	() ): :
ENSDARG00000095829	0.76	1.33	1.63	1.78	0.63	1.62	9.42477	-0.00736834	0.234335	0.911235	0.970266						24	() ): :
ENSDARG00000037186	2.81	2.18	2.4	2.09	2.71	2.22	37.509	0.0125644	0.208808	0.911051	0.970232	tpbgb	792712		trophoblast glycoprotein b [Source:ZFIN	Acc:ZDB-GENE-091218-2]	tpbgb	16	() ): :
ENSDARG00000041429	15.39	16.37	14.85	15.97	14.53	16.28	248.127	-0.0128039	0.143849	0.911158	0.970232	ints14	327593		integrator complex subunit 14 [Source:ZFIN	Acc:ZDB-GENE-030131-5804]	ints14	18	() ): :
ENSDARG00000099226	51.67	48.73	51.75	45.34	52.82	50.1	549.088	0.0122146	0.126173	0.911157	0.970232	ppp1cc	571753				5	() ): :
ENSDARG00000105589	0.51	0.07	0.41	0.32	0.24	0.34	4.55171	0.00577636	0.239285	0.911155	0.970232	LOC100535633	100535633				7	() ): :
ENSDARG00000030213	27.11	27.86	24.21	26.18	24.12	29.33	365.329	-0.0125229	0.136226	0.910918	0.970168	sap30l	327079		sap30-like [Source:NCBI gene (formerly Entrezgene)	Acc:327079]	sap30l	21	() ): :
ENSDARG00000053269	0.31	0.56	0.24	0.45	0.34	0.21	6.38031	0.00676261	0.237034	0.910882	0.970168	slc2a15b	552924		solute carrier family 2 member 15b [Source:ZFIN	Acc:ZDB-GENE-050508-1]	slc2a15b	1	() ): :
ENSDARG00000056618	20.65	18.51	23.8	19.63	19.12	24.5	319.13	-0.012661	0.139124	0.910748	0.970082	xk	497076		X-linked Kx blood group (McLeod syndrome) [Source:ZFIN	Acc:ZDB-GENE-080908-1]	xk	11	GO:0016020(cellular_component) ): :membrane
ENSDARG00000103456	0.76	1.27	0.85	0.08	0.48	2.22	11.3702	0.0066865	0.237495	0.910691	0.970069						23	() ): :
ENSDARG00000117616	1.19	1.31	1.05	0.85	0.91	1.68	27.1428	0.0113398	0.218414	0.910659	0.970069						KN150698.1	() ): :
ENSDARG00000067544	8.77	9.35	8.75	9.83	7.02	9.27	76.2619	0.0137947	0.187096	0.910527	0.96999	tcf15	30159		transcription factor 15 [Source:ZFIN	Acc:ZDB-GENE-980605-20]	tcf15	8	() ): :
ENSDARG00000102305	3.71	4.05	5.23	3.97	5.36	3.7	53.5931	-0.0125383	0.202791	0.910488	0.96999	svbp	798425		small vasohibin binding protein [Source:NCBI gene (formerly Entrezgene)	Acc:798425]	svbp	11	() ): :
ENSDARG00000102950	1.53	1.77	2.82	1.92	1.98	1.94	47.5193	0.0127841	0.206124	0.910509	0.96999	si:ch211-241b2.1	550566		zgc:110688 [Source:ZFIN	Acc:ZDB-GENE-050417-418]	zgc:110688	21	() ): :
ENSDARG00000068628	11.5	10.2	11.99	9.75	13.25	9.4	345.459	0.0138332	0.15935	0.910377	0.969974	rab8b	100093706		RAB8B, member RAS oncogene family [Source:ZFIN	Acc:ZDB-GENE-070620-16]	rab8b	7	() ): :
ENSDARG00000068978	11.78	21.73	14.96	9.29	22.22	14.86	219.167	0.0133755	0.199708	0.910361	0.969974	glo1	368213		glyoxalase 1 [Source:ZFIN	Acc:ZDB-GENE-030722-9]	glo1	13	() ): :
ENSDARG00000096287	0.16	0.4	0.39	0.07	0.25	0.55	5.25868	0.00595662	0.238958	0.910299	0.969974						3	() ): :
ENSDARG00000069742	28.92	28.42	31.35	30.98	27.3	30.27	781.799	-0.0109329	0.111947	0.910196	0.969925	cul5a	327215		cullin 5a [Source:ZFIN	Acc:ZDB-GENE-030131-5426]	cul5a	15	() ): :
ENSDARG00000059824	1.55	2.67	1.23	2.05	0.4	3.68	20.0209	-0.00766355	0.233408	0.909858	0.969757	soat2	564868		sterol O-acyltransferase 2 [Source:ZFIN	Acc:ZDB-GENE-061013-742]	soat2	6	() ): :
ENSDARG00000071013	1.6	2.59	1.45	2.41	1.21	1.71	16.6847	0.00965975	0.227799	0.909994	0.969757	arl6ip6	100037347		ADP-ribosylation factor-like 6 interacting protein 6 [Source:ZFIN	Acc:ZDB-GENE-070410-117]	arl6ip6	6	() ): :
ENSDARG00000071403	196.16	201.23	233.38	231.97	204.76	174.54	1964.04	0.0129064	0.134105	0.909973	0.969757	oaz1a	259192		ornithine decarboxylase antizyme 1a [Source:ZFIN	Acc:ZDB-GENE-020731-4]	oaz1a	22	() ): :
ENSDARG00000077883	1.54	1.3	2.52	1.92	1.26	2.35	35.6946	-0.0113557	0.21513	0.909862	0.969757	fam83d	492689		family with sequence similarity 83 member D [Source:ZFIN	Acc:ZDB-GENE-041111-264]	fam83d	11	() ): :
ENSDARG00000100772	16.2	15.23	12.82	13.76	10.34	19.15	54.047	0.0131738	0.202307	0.909913	0.969757	LOC110440212	110440212				14	() ): :
ENSDARG00000059997	49.55	33.64	39.4	30.64	42.01	47.05	977.466	0.0137876	0.152303	0.909635	0.969613	sv2ca	562345		synaptic vesicle glycoprotein 2Ca [Source:ZFIN	Acc:ZDB-GENE-060526-233]	sv2ca	5	() ): :
ENSDARG00000018650	2.95	2.08	1.79	2.76	1.77	2	33.3076	0.0118979	0.215376	0.909532	0.969552	gtpbp3	553807		GTP binding protein 3, mitochondrial [Source:ZFIN	Acc:ZDB-GENE-050522-335]	gtpbp3	11	() ): :
ENSDARG00000037425	1.54	1.15	2.13	0.67	1.98	1.95	19.438	0.0097948	0.227587	0.909528	0.969552	s100a10a	449788		S100 calcium binding protein A10a [Source:ZFIN	Acc:ZDB-GENE-041010-35]	s100a10a	19	() ): :
ENSDARG00000018266	0.66	0.78	0.44	0.33	0.81	0.83	31.0515	-0.0105212	0.221455	0.909294	0.969393	mthfd1a	567587		methylenetetrahydrofolate dehydrogenase, cyclohydrolase and formyltetrahydrofolate synthetase 1 [Source:HGNC Symbol	Acc:HGNC:7432]	MTHFD1	20	GO:0003824(molecular_function) ): :catalytic activity,GO:0005829(cellular_component) ): :cytosol,GO:0005524(molecular_function) ): :ATP binding,GO:0035999(biological_process) ): :tetrahydrofolate interconversion,GO:0006730(biological_process) ): :one-carbon metabolic process,GO:0004329(molecular_function) ): :formate-tetrahydrofolate ligase activity,GO:0004477(molecular_function) ): :methenyltetr…
ENSDARG00000105444	5.06	1.77	10.66	1.55	7.75	6.55	12.3575	0.00754943	0.235629	0.909283	0.969393	hist1h2a8	103911344		H2A.X variant histone family member 2 [Source:NCBI gene (formerly Entrezgene)	Acc:100001004]		7	() ): :
ENSDARG00000102705	21.19	29.59	33.75	12.04	34.94	34.44	270.664	0.0134657	0.200441	0.909204	0.969393	otud6b	393194		OTU deubiquitinase 6B [Source:ZFIN	Acc:ZDB-GENE-040426-974]	otud6b	19	() ): :
ENSDARG00000008953	1.33	1.07	1.75	1.24	1.13	1.58	18.8456	0.0107856	0.2232	0.908729	0.969361	pofut1	403029		protein O-fucosyltransferase 1 [Source:ZFIN	Acc:ZDB-GENE-040303-2]	pofut1	23	() ): :
ENSDARG00000012887	11.45	11.91	12.91	11.47	12.1	12.75	240.554	-0.0130488	0.141855	0.908959	0.969361	znf143a	492800		zinc finger protein 143a [Source:ZFIN	Acc:ZDB-GENE-041114-154]	znf143a	7	() ): :
ENSDARG00000021208	0.98	1.23	0.64	0.65	1.33	0.94	22.9113	-0.0100222	0.224283	0.909087	0.969361	serpind1	359841		serpin peptidase inhibitor, clade D (heparin cofactor), member 1 [Source:ZFIN	Acc:ZDB-GENE-030711-2]	serpind1	8	() ): :
ENSDARG00000034473	69.59	66.61	68.94	81.23	54.17	70.47	1638.58	-0.0125532	0.132394	0.908907	0.969361	ttyh3a	556314		tweety family member 3 [Source:HGNC Symbol	Acc:HGNC:22222]	TTYH3	3	() ): :
ENSDARG00000035569	3.16	2.23	3.02	2.62	3.13	2.27	69.7886	0.0138195	0.195583	0.909129	0.969361	cyp1d1	492344		cytochrome P450, family 1, subfamily D, polypeptide 1 [Source:ZFIN	Acc:ZDB-GENE-041114-179]	cyp1d1	5	() ): :
ENSDARG00000040698	6.99	6.92	8.55	7.76	6.85	7.89	347.77	-0.0127835	0.13491	0.908959	0.969361	plekha8	492502		pleckstrin homology domain containing, family A (phosphoinositide binding specific) member 8 [Source:ZFIN	Acc:ZDB-GENE-041114-69]	plekha8	16	() ): :
ENSDARG00000044011	3.03	2.96	4.07	3.56	2.74	3.93	83.4937	-0.0136068	0.185955	0.90911	0.969361	xkrx	492765		XK related X-linked [Source:ZFIN	Acc:ZDB-GENE-041114-108]	xkrx	14	() ): :
ENSDARG00000045519	8.12	8.65	12.6	9.93	8.63	9.94	291.861	0.0140451	0.157156	0.908841	0.969361	sfmbt2	555450		Scm like with four mbt domains 2 [Source:HGNC Symbol	Acc:HGNC:20256]	SFMBT2	4	() ): :
ENSDARG00000056160	55.68	54.45	60.47	57.67	54.39	54.58	1320.4	0.0112439	0.107494	0.90862	0.969361	hspd1	282676		heat shock 60 protein 1 [Source:ZFIN	Acc:ZDB-GENE-021206-1]	hspd1	9	() ): :
ENSDARG00000061240	11.28	11.91	9.2	12.89	9.68	10.13	140.502	-0.014203	0.17615	0.908685	0.969361	cbln4	563847		cerebellin 4 precursor [Source:ZFIN	Acc:ZDB-GENE-080204-58]	cbln4	23	() ): :
ENSDARG00000071551	8.66	8.91	11.94	10.43	9.47	8.58	205.972	0.0135574	0.162917	0.908883	0.969361	xrcc6	334488		X-ray repair complementing defective repair in Chinese hamster cells 6 [Source:ZFIN	Acc:ZDB-GENE-030131-6420]	xrcc6	12	() ): :
ENSDARG00000088616	1.18	0.9	1.09	1.87	0.92	0.46	14.4039	-0.00839686	0.231634	0.908547	0.969361						4	() ): :
ENSDARG00000096304	0.38	0.9	1.31	0.31	1.57	0.88	5.8294	-0.00606875	0.238436	0.908735	0.969361	btr31	555877		bloodthirsty-related gene family, member 31 [Source:ZFIN	Acc:ZDB-GENE-090512-3]	btr31	23	() ): :,GO:0016020(cellular_component) ): :membrane,GO:0005737(cellular_component) ): :cytoplasm,GO:0046872(molecular_function) ): :metal ion binding,GO:0016567(biological_process) ): :protein ubiquitination,GO:0061630(molecular_function) ): :ubiquitin protein ligase activity,GO:0004842(molecular_function) ): :ubiquitin-protein transferase activity
ENSDARG00000096728	0.84	0.21	0.19	0.53	0.49	0	7.37946	0.00573448	0.239783	0.908444	0.969361				carboxypeptidase N subunit 1 [Source:HGNC Symbol	Acc:HGNC:2312]	CPN1	12	() ): :
ENSDARG00000100938	3.44	4.86	5.36	3.78	6.05	4	22.6348	-0.0104862	0.221889	0.909121	0.969361	hint2	798688		histidine triad nucleotide binding protein 2 [Source:ZFIN	Acc:ZDB-GENE-070410-139]	hint2	5	() ): :
ENSDARG00000101998	1.58	1.67	2.04	0.84	1.47	2.66	7.05271	0.00742238	0.235908	0.908704	0.969361	si:dkey-1b17.2	563951		si:dkey-1b17.2 [Source:ZFIN	Acc:ZDB-GENE-050208-769]	si:dkey-1b17.2	22	() ): :
ENSDARG00000113364	2.18	3.04	2.86	2.36	2.2	3.72	104.356	-0.0135983	0.186739	0.908391	0.969361						KN150487.1	() ): :
ENSDARG00000115903	20.31	20.11	19.48	19.93	15.3	23.7	314.673	0.0135747	0.147682	0.908914	0.969361				kirre like nephrin family adhesion molecule 3 [Source:HGNC Symbol	Acc:HGNC:23204]	KIRREL3	18	() ): :
ENSDARG00000035820	1.48	1.09	1.26	0.46	1.31	2.32	13.1815	-0.00832631	0.232091	0.908141	0.969254	drd4b	503565		dopamine receptor D4b [Source:ZFIN	Acc:ZDB-GENE-070508-3]	drd4b	7	() ): :
ENSDARG00000039502	186.03	204.61	236.18	226.41	190.96	193.07	3883.01	0.0123732	0.120613	0.908222	0.969254	eef1a1a	336334		eukaryotic translation elongation factor 1 alpha 1a [Source:ZFIN	Acc:ZDB-GENE-030131-8278]	eef1a1a	13	() ): :
ENSDARG00000096142	0.73	1.03	0.55	1.36	0.23	0.96	6.23518	-0.00628076	0.237914	0.908215	0.969254						4	() ): :
ENSDARG00000090863	1.61	2.02	1.87	2.96	1.58	0.73	19.4523	0.00964168	0.228926	0.908025	0.969188	LOC101882972	101882972	XR_661723			5	() ): :
ENSDARG00000003181	1.81	0	0.15	0.9	0.08	0.53	4.76572	0.00424693	0.241885	0.907906	0.969109	sult1st4	402915		sulfotransferase family 1, cytosolic sulfotransferase 4 [Source:ZFIN	Acc:ZDB-GENE-040426-2054]	sult1st4	8	() ): :
ENSDARG00000039757	4.12	4.03	5.81	5.48	4.8	3	115.08	0.0140872	0.193755	0.907768	0.969049	mcfd2	449676		multiple coagulation factor deficiency 2, ER cargo receptor complex subunit [Source:ZFIN	Acc:ZDB-GENE-041010-8]	mcfd2	13	() ): :
ENSDARG00000090914	18.51	18.54	16.17	16.84	17.83	17.16	336.405	0.0135589	0.141983	0.907781	0.969049	si:ch211-117k10.3	556200				11	GO:0005634(cellular_component) ): :nucleus,GO:0000978(molecular_function) ): :RNA polymerase II cis-regulatory region sequence-specific DNA binding,GO:0006357(biological_process) ): :regulation of transcription by RNA polymerase II,GO:0000981(molecular_function) ): :DNA-binding transcription factor activity, RNA polymerase II-specific,GO:0009653(biological_process) ): :anatomical structure morpho…
ENSDARG00000098141	20.73	15.39	14.44	18.18	16.88	15.77	162.272	-0.0139564	0.172985	0.907677	0.969049	supt3h	436898		SPT3 homolog, SAGA and STAGA complex component [Source:ZFIN	Acc:ZDB-GENE-040718-370]	supt3h	17	() ): :
ENSDARG00000117238	2.04	1.28	2.35	1.41	1.26	2.84	44.4533	0.0123745	0.213738	0.907805	0.969049						6	() ): :
ENSDARG00000002840	50.57	44.46	48.7	44.26	43.96	55.87	2321.13	-0.0107852	0.105458	0.90731	0.969038	si:dkey-28b4.8	562640				1	GO:0016020(cellular_component) ): :membrane,GO:0006811(biological_process) ): :monoatomic ion transport,GO:0005524(molecular_function) ): :ATP binding,GO:0000166(molecular_function) ): :nucleotide binding,GO:0005789(cellular_component) ): :endoplasmic reticulum membrane,GO:0016887(molecular_function) ): :ATP hydrolysis activity,GO:0006816(biological_process) ): :calcium ion transport,GO:0070588(b…
ENSDARG00000009585	49.32	50.82	63.47	54.3	48.27	61.26	1019.08	-0.0118964	0.119437	0.907616	0.969038	papola	404041		poly(A) polymerase alpha [Source:ZFIN	Acc:ZDB-GENE-030131-3507]	papola	20	() ): :
ENSDARG00000013279	8.43	8.29	8.98	8.72	7.96	8.25	136.332	0.014349	0.162454	0.90738	0.969038	znf76	564210		zinc finger protein 76 [Source:ZFIN	Acc:ZDB-GENE-061027-379]	znf76	22	GO:0005634(cellular_component) ): :nucleus,GO:0000978(molecular_function) ): :RNA polymerase II cis-regulatory region sequence-specific DNA binding,GO:0006355(biological_process) ): :regulation of DNA-templated transcription,GO:0000981(molecular_function) ): :DNA-binding transcription factor activity, RNA polymerase II-specific,GO:0006357(biological_process) ): :regulation of transcription by RNA…
ENSDARG00000040295	269.43	268.77	248.32	170.3	281.34	318.43	3136.75	0.0142925	0.154312	0.90714	0.969038	apoeb	30314		apolipoprotein Eb [Source:NCBI gene (formerly Entrezgene)	Acc:30314]	apoeb	16	() ): :
ENSDARG00000043877	3.15	1	0.94	1.76	1.68	1.92	18.2272	-0.00901509	0.229726	0.907571	0.969038	mmachc	555267		metabolism of cobalamin associated C [Source:ZFIN	Acc:ZDB-GENE-030131-3167]	mmachc	20	() ): :
ENSDARG00000055715	0.42	0.36	0.57	0.71	0.35	0.16	9.40554	0.00795587	0.234924	0.907497	0.969038	capn8	337730		calpain 8 [Source:ZFIN	Acc:ZDB-GENE-050522-279]	capn8	22	() ): :
ENSDARG00000055854	3.78	5.1	7.56	6.56	3.82	5.47	175.508	0.0147298	0.189205	0.907295	0.969038	nr4a3	548604		nuclear receptor subfamily 4, group A, member 3 [Source:ZFIN	Acc:ZDB-GENE-070824-4]	nr4a3	16	() ): :
ENSDARG00000062978	1.46	1.51	1.48	1.15	1.74	1.29	24.8411	0.0118555	0.218426	0.907458	0.969038	odad3	555601		outer dynein arm docking complex subunit 3 [Source:ZFIN	Acc:ZDB-GENE-061013-787]	odad3	6	() ): :
ENSDARG00000087706	1.72	0.61	2.4	1.86	1.29	1.81	13.0653	-0.00853397	0.23159	0.907551	0.969038	dicp3.3	100884153		diverse immunoglobulin domain-containing protein 3.3 [Source:ZFIN	Acc:ZDB-GENE-120306-20]	dicp3.3	16	() ): :
ENSDARG00000096748	1.99	4.03	3.49	2.87	3.81	2.94	30.2016	-0.0113445	0.21835	0.907298	0.969038	asb2a.2	100536271				20	() ): :
ENSDARG00000101892	3.95	2.05	2.93	3.59	2.28	3.23	106.713	-0.0135424	0.194122	0.907091	0.969038	LOC107988037	107988037				16	() ): :
ENSDARG00000102027	3.8	2.68	3.43	2.81	3.22	3.99	155.066	-0.0139749	0.169278	0.907518	0.969038						4	() ): :
ENSDARG00000103507	5.45	6.85	5.51	6.86	5.75	5.3	114.317	-0.0138546	0.180324	0.907263	0.969038	n4bp2l2	565380				15	GO:0000122(biological_process) ): :negative regulation of transcription by RNA polymerase II,GO:0005634(cellular_component) ): :nucleus,GO:0003714(molecular_function) ): :transcription corepressor activity
ENSDARG00000013307	469.83	415.09	436.07	447.07	479.63	387.44	2317.98	-0.0127359	0.128906	0.906951	0.969026	rpl19	406489		ribosomal protein L19 [Source:ZFIN	Acc:ZDB-GENE-040426-2290]	rpl19	3	() ): :
ENSDARG00000017338	101.05	88.94	103.95	90.17	94.09	103.99	5903.3	0.0104651	0.0945012	0.906863	0.969026	kidins220b	335881		kinase D-interacting substrate 220b [Source:ZFIN	Acc:ZDB-GENE-030131-7824]	kidins220b	20	() ): :
ENSDARG00000020301	24.46	22.31	23	17.26	24.06	29.19	464.403	-0.0137056	0.151771	0.906992	0.969026	os9	553455		OS9 endoplasmic reticulum lectin [Source:ZFIN	Acc:ZDB-GENE-060929-32]	os9	6	() ): :
ENSDARG00000029581	12.33	14.23	10.91	9.87	12.08	14.56	140.942	0.0146011	0.174133	0.906593	0.969026	tbc1d7	393750		TBC1 domain family, member 7 [Source:NCBI gene (formerly Entrezgene)	Acc:393750]	tbc1d7	20	() ): :
ENSDARG00000036180	0.28	0.34	0.67	0.4	0.36	0.42	4.94423	0.00667088	0.23802	0.906922	0.969026	ccnb2	368316		cyclin B2 [Source:ZFIN	Acc:ZDB-GENE-030429-12]	ccnb2	7	() ): :
ENSDARG00000052465	4.78	8.45	8.46	5.9	7.73	6.77	74.6837	0.0138731	0.199764	0.906956	0.969026	dusp10	100034609		dual specificity phosphatase 10 [Source:HGNC Symbol	Acc:HGNC:3065]	DUSP10	20	() ): :,GO:0016787(molecular_function) ): :hydrolase activity,GO:0005737(cellular_component) ): :cytoplasm,GO:0005829(cellular_component) ): :cytosol,GO:0004721(molecular_function) ): :phosphoprotein phosphatase activity,GO:0008138(molecular_function) ): :protein tyrosine/serine/threonine phosphatase activity,GO:0016311(biological_process) ): :dephosphorylation,GO:0017017(molecular_function) ): :…
ENSDARG00000060438	2.15	1.73	1.73	1.63	1.55	2.29	77.4668	0.0143045	0.18856	0.906924	0.969026	tbl1x	560294		transducin beta like 1 X-linked [Source:ZFIN	Acc:ZDB-GENE-070209-131]	tbl1x	9	() ): :
ENSDARG00000074779	10.84	11.6	12.49	11	10.68	12.56	738.638	0.011595	0.111921	0.907021	0.969026	alms1	561882				13	GO:0046599(biological_process) ): :regulation of centriole replication,GO:0044342(biological_process) ): :type B pancreatic cell proliferation,GO:0005737(cellular_component) ): :cytoplasm,GO:0005856(cellular_component) ): :cytoskeleton,GO:0005829(cellular_component) ): :cytosol,GO:0009887(biological_process) ): :animal organ morphogenesis,GO:0005813(cellular_component) ): :centrosome,GO:0008017(m…
ENSDARG00000091128	6.22	5.37	5.29	5.57	4.44	6.43	64.8469	0.0141579	0.192117	0.90697	0.969026	lrrc75bb	100148888		leucine rich repeat containing 75Bb [Source:ZFIN	Acc:ZDB-GENE-110721-3]	lrrc75bb	10	() ): :
ENSDARG00000092150	1.67	0.94	1.69	0.75	2.35	1.42	9.28244	-0.00773531	0.234522	0.906721	0.969026						19	() ): :
ENSDARG00000104809	2.71	2.31	3.42	2.08	2.56	4.08	42.9112	-0.0124774	0.208928	0.906947	0.969026	top1mt	415098		DNA topoisomerase I mitochondrial [Source:ZFIN	Acc:ZDB-GENE-040624-2]	top1mt	24	() ): :
ENSDARG00000015110	11.14	11.5	10.44	9.55	12.08	11.56	180.63	-0.0140532	0.160402	0.90635	0.968907	slc18a2	553304		solute carrier family 18 member 2 [Source:ZFIN	Acc:ZDB-GENE-080514-1]	slc18a2	17	() ): :
ENSDARG00000028082	8.23	8.44	12.44	10.97	9.53	8.63	159.577	-0.0139675	0.175063	0.906303	0.968907	mapkapk5	436608		MAPK activated protein kinase 5 [Source:ZFIN	Acc:ZDB-GENE-040718-25]	mapkapk5	5	() ): :
ENSDARG00000034714	11.23	12.26	18.35	17.56	11.76	10.78	381.828	0.0146889	0.176507	0.906286	0.968907	esyt1a	567227				23	() ): :
ENSDARG00000076443	7.21	8.43	9.74	10.27	6.26	8.15	541.113	0.0144132	0.157323	0.906417	0.968907	si:dkey-183c6.8	100538182				7	() ): :,GO:0009100(biological_process) ): :glycoprotein metabolic process,GO:0016231(molecular_function) ): :beta-N-acetylglucosaminidase activity,GO:1901564(biological_process) ): :organonitrogen compound metabolic process
ENSDARG00000098809	25.69	25.94	27.43	27.85	22.21	27.45	1043.51	0.0122862	0.114047	0.906377	0.968907	snap91a	565384		synaptosome associated protein 91 [Source:HGNC Symbol	Acc:HGNC:14986]	SNAP91	16	() ): :
ENSDARG00000017841	46.44	42.01	52.72	48.07	48.04	44.17	2299.54	-0.01195	0.116698	0.906011	0.968713	cand1	406806		cullin-associated and neddylation-dissociated 1 [Source:ZFIN	Acc:ZDB-GENE-040426-2872]	cand1	4	() ): :
ENSDARG00000103619	20.2	21.3	9.4	14.56	21.18	15.76	83.5252	-0.0126377	0.208087	0.906011	0.968713	si:ch73-238c9.1	100536921				11	() ): :
ENSDARG00000040707	6.23	8.11	9.96	6.6	7.02	11.29	79.089	-0.0136889	0.195187	0.905888	0.968677	chchd4b	450030		coiled-coil-helix-coiled-coil-helix domain containing 4b [Source:ZFIN	Acc:ZDB-GENE-041010-149]	chchd4b	6	() ): :
ENSDARG00000089435	8.55	7.18	8.55	5.96	6.48	12.84	43.1508	-0.0124954	0.210421	0.905785	0.968614						16	() ): :
ENSDARG00000007275	53.15	72.85	121.48	103.38	74.94	53.25	1730.57	0.0130878	0.214537	0.905664	0.968534	si:ch211-251b21.1	571720		si:ch211-251b21.1 [Source:ZFIN	Acc:ZDB-GENE-060809-5]	si:ch211-251b21.1	8	() ): :
ENSDARG00000028889	75.85	94.06	82.39	73.83	100.78	77.43	452.269	-0.0140268	0.156051	0.905628	0.968534	ndufb10	393703		NADH:ubiquinone oxidoreductase subunit B10 [Source:ZFIN	Acc:ZDB-GENE-040426-1691]	ndufb10	3	() ): :
ENSDARG00000045296	29.87	26.72	25.53	37.27	22.44	24.07	49.3604	-0.0130061	0.205438	0.905496	0.968534	cops9	393820		COP9 signalosome subunit 9 [Source:ZFIN	Acc:ZDB-GENE-040426-1883]	cops9	24	() ): :
ENSDARG00000099364	8.31	11.68	11.17	18.72	0	8.04	144.744	0.00433033	0.24252	0.905612	0.968534						22	() ): :
ENSDARG00000115005	18.02	17.54	17.22	18.11	21.05	14.88	16.1304	-0.0102124	0.225656	0.90565	0.968534						5	() ): :
ENSDARG00000013063	74.75	73.49	84.72	74.14	78.52	74.46	1759.87	0.0125014	0.109022	0.905276	0.968493	oxct1a	442923		3-oxoacid CoA transferase 1a [Source:ZFIN	Acc:ZDB-GENE-040723-3]	oxct1a	8	() ): :
ENSDARG00000035694	92.44	104.61	82.23	71.29	139.91	48.97	2272.02	0.0120627	0.220189	0.905351	0.968493	stm	386700		starmaker [Source:NCBI gene (formerly Entrezgene)	Acc:386700]	stm	19	() ): :
ENSDARG00000035904	3.18	1.9	4.04	2.21	4.65	2.34	22.5646	-0.0102843	0.22551	0.905057	0.968493	crabp1b	415102		cellular retinoic acid binding protein 1b [Source:ZFIN	Acc:ZDB-GENE-040624-3]	crabp1b	7	() ): :
ENSDARG00000038064	44.31	45.85	49.95	56.23	42	41.8	470.455	-0.0136984	0.146275	0.905388	0.968493	chmp3	406621		charged multivesicular body protein 3 [Source:NCBI gene (formerly Entrezgene)	Acc:406621]	chmp3	17	() ): :
ENSDARG00000053708	5.45	4.34	4.22	4.38	4.21	5.66	97.355	-0.014175	0.180795	0.905402	0.968493	ghrhrb	792410				6	GO:0016020(cellular_component) ): :membrane,GO:0004888(molecular_function) ): :transmembrane signaling receptor activity,GO:0005886(cellular_component) ): :plasma membrane,GO:0004930(molecular_function) ): :G protein-coupled receptor activity,GO:0007165(biological_process) ): :signal transduction,GO:0007186(biological_process) ): :G protein-coupled receptor signaling pathway,GO:0007188(biological…
ENSDARG00000070425	2.96	3.14	3.26	3.77	3.27	1.88	116.627	0.014476	0.194685	0.905141	0.968493	dll4	563920		delta-like 4 (Drosophila) [Source:ZFIN	Acc:ZDB-GENE-041014-73]	dll4	20	() ): :
ENSDARG00000099710	1.89	3.61	7.52	8.02	1.43	4.28	184.252	-0.00753301	0.234664	0.905299	0.968493						7	() ): :
ENSDARG00000101345	1.04	0.97	0.47	0.97	0	1.36	5.71814	0.00577859	0.23998	0.905238	0.968493						7	() ): :
ENSDARG00000103337	3.12	2.61	5.59	2.86	4.33	4.26	72.2079	-0.0131653	0.204224	0.905296	0.968493	rrp1	321059				9	() ): :
ENSDARG00000104974	10.64	5.37	8.54	4.11	8.8	10.53	42.7982	0.0122949	0.216535	0.905165	0.968493	slain1b	100151758		SLAIN motif family, member 1b [Source:ZFIN	Acc:ZDB-GENE-080516-6]	slain1b	6	() ): :
ENSDARG00000027687	4.27	3.27	4.78	5.64	3.11	2.99	61.3267	0.0135494	0.205987	0.904941	0.968479	tmem230a	445502		transmembrane protein 230a [Source:ZFIN	Acc:ZDB-GENE-040822-20]	tmem230a	10	GO:0016020(cellular_component) ): :membrane,GO:0008021(cellular_component) ): :synaptic vesicle,GO:0012505(cellular_component) ): :endomembrane system,GO:0003674(molecular_function) ): :molecular_function,GO:0005794(cellular_component) ): :Golgi apparatus,GO:0045202(cellular_component) ): :synapse,GO:0031410(cellular_component) ): :cytoplasmic vesicle,GO:0048489(biological_process) ): :synaptic v…
ENSDARG00000114451	0.41	0.12	0.68	0.47	0.46	0.15	9.51836	0.00765374	0.236242	0.90491	0.968479						10	() ): :
ENSDARG00000055754	14.71	16.93	22.39	0.03	26.39	35.82	718.328	-0.00365018	0.242143	0.904772	0.968456	smc1a	559665		structural maintenance of chromosomes 1A [Source:ZFIN	Acc:ZDB-GENE-090506-9]	smc1a	23	GO:0005634(cellular_component) ): :nucleus,GO:0005524(molecular_function) ): :ATP binding,GO:0003677(molecular_function) ): :DNA binding,GO:0007049(biological_process) ): :cell cycle,GO:0005694(cellular_component) ): :chromosome,GO:0016887(molecular_function) ): :ATP hydrolysis activity,GO:0051276(biological_process) ): :chromosome organization,GO:0007417(biological_process) ): :central nervous s…
ENSDARG00000058962	7.35	7.81	8.41	6.82	8.29	7.43	57.0253	0.0135661	0.195048	0.90483	0.968456	txnl4b	641329		thioredoxin-like 4B [Source:ZFIN	Acc:ZDB-GENE-051030-63]	txnl4b	1	() ): :
ENSDARG00000068400	10.07	11.03	12.15	10.57	9.15	12.84	196.818	0.0145429	0.154425	0.90476	0.968456	znf131	393477		zinc finger protein 131 [Source:ZFIN	Acc:ZDB-GENE-040426-1563]	znf131	8	() ): :
ENSDARG00000097657	2.33	3.63	4.28	3.1	3.73	2.77	17.7583	0.0107889	0.225581	0.9048	0.968456	LOC108179274	108179274				15	() ): :
ENSDARG00000012144	33.77	32.65	39.69	39.65	35.66	26.81	602.735	0.0146389	0.154256	0.904644	0.968448	emc7b	561549		ER membrane protein complex subunit 7b [Source:ZFIN	Acc:ZDB-GENE-041001-170]	emc7b	20	() ): :
ENSDARG00000067646	0.55	0.49	0.55	0.76	0.38	0.33	9.46957	0.00865048	0.233452	0.904514	0.968448	tmem232	793774		transmembrane protein 232 [Source:ZFIN	Acc:ZDB-GENE-070705-434]	tmem232	5	() ): :
ENSDARG00000076439	29.01	23.2	22.06	29.31	22.37	20.12	427.632	0.0147543	0.162008	0.904628	0.968448	ppp4cb	562705		protein phosphatase 4, catalytic subunit b [Source:ZFIN	Acc:ZDB-GENE-080219-32]	ppp4cb	12	() ): :
ENSDARG00000079860	13.14	13.14	11.44	9.58	12.73	15.92	256.912	-0.0143607	0.162663	0.90452	0.968448	ppp1r16b	799771		protein phosphatase 1 regulatory subunit 16B [Source:HGNC Symbol	Acc:HGNC:15850]	PPP1R16B	6	() ): :
ENSDARG00000099729	190.98	157.46	177.96	136.75	170.04	224.28	3681.04	-0.0133108	0.135326	0.904382	0.968448	pcdh10a	259186		protocadherin 10a [Source:ZFIN	Acc:ZDB-GENE-020731-1]	pcdh10a	1	() ): :
ENSDARG00000112575	0.37	0.22	0.43	0.33	0.35	0.42	6.22843	-0.00726201	0.236306	0.904584	0.968448	casp17	101886133				10	() ): :
ENSDARG00000117130	5.23	4.9	4.4	5.36	4.24	5.06	216.538	-0.0140066	0.155248	0.904428	0.968448	arl10	560654		ADP-ribosylation factor-like 10 [Source:NCBI gene (formerly Entrezgene)	Acc:560654]		21	() ): :
ENSDARG00000042114	111.87	111.66	115	111.43	108	111.41	752.13	0.0121008	0.111818	0.904231	0.968342	LOC563561	563561		bridging integrator 1 [Source:HGNC Symbol	Acc:HGNC:1052]	BIN1	9	() ): :
ENSDARG00000003998	50.47	49.6	53.78	46.46	47.43	60.45	1328.12	-0.0115847	0.108497	0.904092	0.968242	phyhipla	790943		phytanoyl-CoA 2-hydroxylase interacting protein-like a [Source:ZFIN	Acc:ZDB-GENE-061215-64]	phyhipla	17	() ): :
ENSDARG00000030092	0.76	0.69	0.85	0.29	0.72	1.19	11.3577	0.0089892	0.232581	0.903941	0.968127	tram2	406344		translocation associated membrane protein 2 [Source:ZFIN	Acc:ZDB-GENE-040426-2024]	tram2	20	() ): :
ENSDARG00000074266	2.83	3.03	3.31	1.56	3.21	4.07	68.8836	0.013884	0.20465	0.903866	0.968095	si:ch1073-314i13.4	100330660				3	GO:0005739(cellular_component) ): :mitochondrion
ENSDARG00000103667	11.65	10.96	14.31	11.7	11.82	12.35	262.755	0.0142669	0.144288	0.903847	0.968095	gga3a	492643		golgi associated, gamma adaptin ear containing, ARF binding protein 3a [Source:ZFIN	Acc:ZDB-GENE-041111-218]	gga3a	6	() ): :
ENSDARG00000021082	5.62	4.78	4.3	4.28	4.45	6.19	267.837	-0.0144055	0.158026	0.90375	0.968083	sec31a	266638		SEC31 homolog A, COPII coat complex component [Source:NCBI gene (formerly Entrezgene)	Acc:266638]	sec31a	10	() ): :
ENSDARG00000099556	4.19	8.1	7.23	4.35	2.84	11.26	8.04667	0.00781147	0.235934	0.903766	0.968083						19	() ): :
ENSDARG00000003872	27.33	27.23	25.31	27.6	23.9	26.68	795.49	0.0128728	0.119268	0.903327	0.96804	ccdc102a	325319		coiled-coil domain containing 102A [Source:NCBI gene (formerly Entrezgene)	Acc:325319]	ccdc102a	7	() ): :
ENSDARG00000004697	1.19	0.71	1.22	1.48	0.94	0.8	19.1516	-0.0105438	0.225365	0.902842	0.96804	rxrgb	436617		retinoid X receptor, gamma b [Source:NCBI gene (formerly Entrezgene)	Acc:436617]	rxrgb	20	() ): :
ENSDARG00000007657	7.92	9.5	10.18	9.34	9.55	8.84	104.612	-0.0146059	0.176503	0.903556	0.96804	ccnh	541325		cyclin H [Source:ZFIN	Acc:ZDB-GENE-050320-13]	ccnh	5	() ): :
ENSDARG00000008010	1.95	0.44	1.01	1.04	0.39	2.38	7.94138	-0.00682887	0.237483	0.903253	0.96804	foxl2l	100004081		forkhead box L2-like [Source:ZFIN	Acc:ZDB-GENE-081022-71]	foxl2l	23	() ): :
ENSDARG00000013457	21.45	21.41	25.13	22.05	21.96	22.24	570.357	0.0130192	0.120955	0.903485	0.96804	mtrex	406795		Mtr4 exosome RNA helicase [Source:ZFIN	Acc:ZDB-GENE-040426-2854]	mtrex	10	() ): :
ENSDARG00000027584	1.18	3.25	2.33	1.58	3.45	1.89	16.0013	-0.00920309	0.230505	0.903291	0.96804	ttpa	325906		tocopherol (alpha) transfer protein [Source:ZFIN	Acc:ZDB-GENE-030131-4631]	ttpa	2	() ): :
ENSDARG00000034270	65.31	58.09	58.61	52.05	54.89	72.17	2252.34	0.012848	0.118265	0.903216	0.96804	ogdha	564552		oxoglutarate dehydrogenase a [Source:ZFIN	Acc:ZDB-GENE-030131-2143]	ogdha	8	() ): :
ENSDARG00000042025	6.47	6.3	7.14	7.34	6.51	5.19	83.6001	0.0149008	0.18756	0.90334	0.96804	si:dkeyp-118h3.6	553393		si:dkeyp-118h3.6 [Source:NCBI gene (formerly Entrezgene)	Acc:553393]	C9H2orf49	9	GO:0005634(cellular_component) ): :nucleus,GO:0003674(molecular_function) ): :molecular_function,GO:0048598(biological_process) ): :embryonic morphogenesis,GO:0072669(cellular_component) ): :tRNA-splicing ligase complex
ENSDARG00000043301	16.45	24.19	23.23	23.53	19.59	21.31	153.434	-0.0144132	0.172447	0.903607	0.96804	gtf3c6	393232		general transcription factor IIIC, polypeptide 6, alpha [Source:ZFIN	Acc:ZDB-GENE-040426-1009]	gtf3c6	16	() ): :
ENSDARG00000052624	31.7	33.09	38.51	39.45	29.64	31.17	339.354	0.0145676	0.149197	0.90333	0.96804	spryd7a	407615		SPRY domain containing 7a [Source:ZFIN	Acc:ZDB-GENE-040426-2713]	spryd7a	1	() ): :
ENSDARG00000056764	1.88	2.17	1.69	1.99	1.66	2.16	288.405	-0.0142548	0.151758	0.903338	0.96804	hydin	557988		HYDIN axonemal central pair apparatus protein [Source:ZFIN	Acc:ZDB-GENE-050419-219]	hydin	18	() ): :
ENSDARG00000058345	3.5	3.22	4.71	3.77	4.09	3.83	24.8844	-0.0119649	0.217473	0.903524	0.96804	si:dkey-5i3.5	565091		si:dkey-5i3.5 [Source:ZFIN	Acc:ZDB-GENE-070424-162]	si:dkey-5i3.5	18	() ): :
ENSDARG00000075956	54.69	55.12	53.74	48.42	50.79	61.48	1113.95	0.0121071	0.110824	0.90349	0.96804	faxca	797483		failed axon connections homolog, metaxin like GST domain containing [Source:HGNC Symbol	Acc:HGNC:20742]	FAXC	4	GO:0005737(cellular_component) ): :cytoplasm
ENSDARG00000076499	14.98	16.54	17.61	12.3	15.85	19.8	280.608	0.0147586	0.155242	0.903552	0.96804				ubiquitin specific peptidase 53 [Source:HGNC Symbol	Acc:HGNC:29255]	USP53	1	() ): :
ENSDARG00000078187	84.92	72.62	70.31	71.14	73.37	78.84	5281.58	0.0121289	0.110672	0.903558	0.96804	slc12a5b	797331		solute carrier family 12 member 5b [Source:ZFIN	Acc:ZDB-GENE-080707-1]	slc12a5b	8	() ): :
ENSDARG00000091977	1.15	1.02	1.74	3.56	0.18	0.5	6.67534	-0.00585302	0.239487	0.903218	0.96804						5	() ): :
ENSDARG00000091994	0.17	0.67	0.27	0.86	0.24	0.07	7.81923	-0.00609466	0.238828	0.903493	0.96804	LOC108183928	108183928		zgc:173713 [Source:ZFIN	Acc:ZDB-GENE-080215-19]	zgc:173713	4	() ): :
ENSDARG00000093999	3.56	4.35	4.81	5.62	2.18	5.57	59.0343	-0.012784	0.210731	0.902955	0.96804	ttf1.2	100334190		transcription termination factor 1, tandem duplicate 2 [Source:ZFIN	Acc:ZDB-GENE-100921-87]	ttf1.2	5	() ): :
ENSDARG00000101380	9.83	8.27	7.41	0.52	13.96	8.44	93.6393	0.00684366	0.238709	0.90349	0.96804	cryabb	436943		crystallin, alpha B, b [Source:ZFIN	Acc:ZDB-GENE-040718-419]	cryabb	5	() ): :
ENSDARG00000114879	0.44	0.12	0.54	0.34	0.1	0.79	6.49481	-0.0063739	0.238547	0.902922	0.96804	dok3	100333972				KN150642.1	() ): :
ENSDARG00000117308	6.54	9.01	11.17	13.14	3.6	8.98	100.154	0.0131676	0.212123	0.903635	0.96804				zgc:194629 [Source:ZFIN	Acc:ZDB-GENE-081022-133]	zgc:194629	21	() ): :
ENSDARG00000100908	29.1	28.96	28.01	26.76	21.08	37	548.479	0.0144127	0.14852	0.902642	0.967983	lcor	558560				22	() ): :
ENSDARG00000099406	1.01	0.45	0.73	0.61	0.33	1.43	19.9775	-0.00906074	0.229612	0.902527	0.967908	lrit1b	553432		leucine-rich repeat, immunoglobulin-like and transmembrane domains 1b [Source:ZFIN	Acc:ZDB-GENE-060616-45]	lrit1b	12	() ): :
ENSDARG00000005015	20.13	18.47	22.88	21.23	18.48	21.81	693.021	-0.011157	0.118335	0.902098	0.967847	tspy	337214		testis specific protein Y-linked [Source:ZFIN	Acc:ZDB-GENE-030131-9158]	tspy	8	() ): :
ENSDARG00000014910	1.71	0.92	2.01	1.52	1.78	1.4	43.9849	-0.0129182	0.211288	0.902308	0.967847	panx1b	567417		pannexin 1b [Source:ZFIN	Acc:ZDB-GENE-070705-192]	panx1b	5	() ): :
ENSDARG00000021945	24.68	22.36	21.15	21.34	21.77	25.36	706.248	-0.0128727	0.122141	0.902214	0.967847	ddx23	334283		DEAD (Asp-Glu-Ala-Asp) box polypeptide 23 [Source:ZFIN	Acc:ZDB-GENE-030131-6215]	ddx23	23	() ): :
ENSDARG00000032117	18.28	19.17	22.3	20.23	20.31	19.07	430.76	-0.0136187	0.133694	0.902425	0.967847	ddx1	556790		DEAD (Asp-Glu-Ala-Asp) box helicase 1 [Source:ZFIN	Acc:ZDB-GENE-041001-215]	ddx1	20	() ): :
ENSDARG00000035506	1.56	2.33	1.47	1.79	1.41	2.41	35.9558	-0.0125718	0.213482	0.902333	0.967847	entpd2a.1	447905		ectonucleoside triphosphate diphosphohydrolase 2a, tandem duplicate 1 [Source:ZFIN	Acc:ZDB-GENE-040724-187]	entpd2a.1	5	() ): :
ENSDARG00000039208	13.06	12.33	13.4	11.46	16.11	11.15	155.474	-0.0150495	0.175481	0.902405	0.967847	nasp	799570		nuclear autoantigenic sperm protein (histone-binding) [Source:ZFIN	Acc:ZDB-GENE-030131-5511]	nasp	6	() ): :
ENSDARG00000044900	1.04	2.47	1.5	2.84	1	1.46	32.0015	-0.0107028	0.224549	0.902358	0.967847	prlhr2a	654782		prolactin releasing hormone receptor 2a [Source:ZFIN	Acc:ZDB-GENE-060209-1]	prlhr2a	8	() ): :
ENSDARG00000058039	17.5	52.26	41.34	76.71	11.75	11.27	608.103	0.00762312	0.237622	0.902044	0.967847	bhlhe22	393930		basic helix-loop-helix family, member e22 [Source:ZFIN	Acc:ZDB-GENE-040426-1411]	bhlhe22	24	() ): :,GO:0046983(molecular_function) ): :protein dimerization activity,GO:0003700(molecular_function) ): :DNA-binding transcription factor activity,GO:0005634(cellular_component) ): :nucleus,GO:0045944(biological_process) ): :positive regulation of transcription by RNA polymerase II,GO:0005515(molecular_function) ): :protein binding,GO:0030154(biological_process) ): :cell differentiation,GO:000…
ENSDARG00000092088	4.5	6.01	5.01	2.6	5.03	8.92	18.4543	-0.0101552	0.227377	0.902253	0.967847	LOC103909508	103909508				22	() ): :
ENSDARG00000101752	3.29	3.13	3.41	2.68	2.6	4.83	123.135	-0.0147453	0.183455	0.902191	0.967847	plekhg5b	796404		pleckstrin homology and RhoGEF domain containing G5 [Source:HGNC Symbol	Acc:HGNC:29105]	PLEKHG5	23	GO:0005886(cellular_component) ): :plasma membrane,GO:0005085(molecular_function) ): :guanyl-nucleotide exchange factor activity,GO:0007266(biological_process) ): :Rho protein signal transduction,GO:0030424(cellular_component) ): :axon,GO:0001525(biological_process) ): :angiogenesis,GO:0043534(biological_process) ): :blood vessel endothelial cell migration,GO:0030139(cellular_component) ): :endoc…
ENSDARG00000102433	0.59	0.39	0.98	0.55	0.52	0.77	14.7861	0.0102645	0.228791	0.902179	0.967847	sytl4	553322		synaptotagmin-like 4 [Source:ZFIN	Acc:ZDB-GENE-070209-217]	sytl4	14	() ): :
ENSDARG00000058964	1.88	2.19	1.81	1.42	1.56	3.18	40.5506	-0.0127274	0.212882	0.901885	0.967796	themis2	100535600				16	() ): :,GO:0005737(cellular_component) ): :cytoplasm,GO:0005634(cellular_component) ): :nucleus,GO:0050852(biological_process) ): :T cell receptor signaling pathway
ENSDARG00000076144	10.72	6	5.36	11.43	8.25	2.69	98.3145	-0.0118171	0.219198	0.901858	0.967796	icam3	100334824				3	() ): :
ENSDARG00000114424	0.11	0.78	0.85	0.28	0.45	0.83	4.89456	0.0062823	0.239442	0.901654	0.967644						KN150505.1	() ): :
ENSDARG00000097231	1.1	0.55	0.66	0.98	0.8	0.47	11.116	-0.00885007	0.232477	0.901588	0.967621	ugt1b2	100384893		UDP glucuronosyltransferase 1 family, polypeptide B2 [Source:ZFIN	Acc:ZDB-GENE-080227-11]	ugt1b2	11	() ): :
ENSDARG00000098115	0.38	0.41	0.28	0.53	0.38	0.22	12.2186	-0.00921101	0.23128	0.901566	0.967621	si:dkey-178j11.5	103910482				4	() ): :
ENSDARG00000104177	18.32	19.17	24.57	24.01	18.77	19.32	368.891	-0.0144736	0.150524	0.901558	0.967621	cpne3	393136		copine III [Source:ZFIN	Acc:ZDB-GENE-040426-763]	cpne3	24	() ): :
ENSDARG00000008811	0.77	1.42	0.65	0.59	0.95	1.1	14.0099	0.00993964	0.23021	0.901449	0.967616	cmtm3	445074		CKLF-like MARVEL transmembrane domain containing 3 [Source:ZFIN	Acc:ZDB-GENE-040801-206]	cmtm3	7	() ): :
ENSDARG00000042409	45.59	24.78	26.89	28.02	35.42	34.76	769.175	-0.0150095	0.17022	0.901377	0.967587	ralgds	799483		ral guanine nucleotide dissociation stimulator [Source:ZFIN	Acc:ZDB-GENE-081105-110]	ralgds	8	() ): :
ENSDARG00000004336	43.5	45.38	35.95	40.6	33.81	48.43	973.251	0.0147127	0.137399	0.901283	0.967534	exoc4	559866		exocyst complex component 4 [Source:ZFIN	Acc:ZDB-GENE-041210-112]	exoc4	4	() ): :
ENSDARG00000014916	0.33	0.23	0.15	0.48	0.16	0.14	4.26996	-0.00601094	0.239485	0.901279	0.967534	slc10a2	393329		solute carrier family 10 member 2 [Source:ZFIN	Acc:ZDB-GENE-040426-1328]	slc10a2	9	() ): :
ENSDARG00000054818	451.07	458.63	372.8	420.66	441.8	385.45	1281.42	0.01428	0.135814	0.901224	0.967534	rpl32	556556		ribosomal protein L32 [Source:ZFIN	Acc:ZDB-GENE-060331-105]	rpl32	22	() ): :
ENSDARG00000075092	0.18	0.88	0.25	0.34	0.26	0.6	4.27882	0.00611528	0.239772	0.901257	0.967534	si:dkey-52l18.4	560708		si:dkey-52l18.4 [Source:NCBI gene (formerly Entrezgene)	Acc:560708]		15	() ): :,GO:0019815(cellular_component) ): :B cell receptor complex,GO:0016020(cellular_component) ): :membrane,GO:0005886(cellular_component) ): :plasma membrane,GO:0050853(biological_process) ): :B cell receptor signaling pathway
ENSDARG00000045696	20.52	20.96	24.29	17.81	27.56	20.3	208.098	-0.014854	0.171098	0.901079	0.967507	mrpl23	415142		mitochondrial ribosomal protein L23 [Source:ZFIN	Acc:ZDB-GENE-040625-12]	mrpl23	25	GO:0003735(molecular_function) ): :structural constituent of ribosome,GO:0006412(biological_process) ): :translation,GO:0005840(cellular_component) ): :ribosome,GO:1990904(cellular_component) ): :ribonucleoprotein complex,GO:0044391(cellular_component) ): :ribosomal subunit
ENSDARG00000076317	5.57	7.57	7.5	4.38	8.96	7.59	136.611	-0.0145207	0.192288	0.901048	0.967507	plod3	556077		procollagen-lysine, 2-oxoglutarate 5-dioxygenase 3 [Source:ZFIN	Acc:ZDB-GENE-021031-4]	plod3	23	() ): :
ENSDARG00000002771	1.07	0.64	0.95	1.19	0.5	0.87	54.9228	0.013614	0.211008	0.900959	0.967475	slc4a5a	559268		solute carrier family 4 member 5 [Source:HGNC Symbol	Acc:HGNC:18168]	SLC4A5	5	() ): :
ENSDARG00000003706	0.08	0.19	0.12	0.16	0.08	0.18	27.857	-0.0113689	0.222386	0.90066	0.967471	ryr2b	568463		ryanodine receptor 2 [Source:HGNC Symbol	Acc:HGNC:10484]	RYR2	17	() ): :
ENSDARG00000003973	12.48	12.04	14.46	9.67	13.41	14.68	156.557	0.0155062	0.168304	0.900545	0.967471	chordc1a	573996		cysteine and histidine-rich domain (CHORD) containing 1a [Source:ZFIN	Acc:ZDB-GENE-050626-79]	chordc1a	15	GO:0005575(cellular_component) ): :cellular_component,GO:0046872(molecular_function) ): :metal ion binding,GO:0051298(biological_process) ): :centrosome duplication,GO:0008270(molecular_function) ): :zinc ion binding
ENSDARG00000023771	31.82	66.59	57.07	89.55	26	28.48	961.34	0.0104931	0.229819	0.900599	0.967471	gabrb3	566922				6	() ): :,GO:0016020(cellular_component) ): :membrane,GO:0006811(biological_process) ): :monoatomic ion transport,GO:0004890(molecular_function) ): :GABA-A receptor activity,GO:0004888(molecular_function) ): :transmembrane signaling receptor activity,GO:0005216(molecular_function) ): :monoatomic ion channel activity,GO:0005230(molecular_function) ): :extracellular ligand-gated monoatomic ion channe…
ENSDARG00000025500	5.78	5.32	5.2	4.52	4.52	6.94	164.055	0.0154541	0.167426	0.900805	0.967471	mtx1a	556917		metaxin 1a [Source:ZFIN	Acc:ZDB-GENE-060606-2]	mtx1a	16	GO:0016020(cellular_component) ): :membrane,GO:0005737(cellular_component) ): :cytoplasm,GO:0005739(cellular_component) ): :mitochondrion,GO:0015031(biological_process) ): :protein transport,GO:0007005(biological_process) ): :mitochondrion organization,GO:0005741(cellular_component) ): :mitochondrial outer membrane,GO:0001401(cellular_component) ): :SAM complex
ENSDARG00000053215	0.45	0.45	0.98	0.2	0.77	0.59	5.6293	0.00715732	0.238045	0.900911	0.967471	me1	768196		malic enzyme 1, NADP(+)-dependent, cytosolic [Source:ZFIN	Acc:ZDB-GENE-061013-438]	me1	16	() ): :
ENSDARG00000060679	81.26	87.96	92.93	83.36	80	93.83	1702.11	0.011521	0.0999304	0.900911	0.967471	kdm1a	558450		lysine (K)-specific demethylase 1a [Source:ZFIN	Acc:ZDB-GENE-030131-7828]	kdm1a	17	() ): :
ENSDARG00000077985	1.96	1.63	1.68	0.95	1.84	2.15	14.5725	0.0105341	0.228278	0.900885	0.967471	kiss2	100216472		kisspeptin 2 [Source:ZFIN	Acc:ZDB-GENE-090526-1]	kiss2	4	() ): :
ENSDARG00000079064	28.58	37.2	30.56	38.73	29.5	28.84	183.656	-0.0146435	0.171184	0.900839	0.967471						15	() ): :
ENSDARG00000094324	2.18	1.52	1.84	1.1	2.14	2.07	91.6039	0.0148731	0.197038	0.900906	0.967471	efemp2a	494044		EGF containing fibulin extracellular matrix protein 2a [Source:ZFIN	Acc:ZDB-GENE-041212-8]	efemp2a	14	() ): :
ENSDARG00000104058	6.01	4.66	8.56	5.87	7.62	5.92	54.9811	-0.013847	0.204063	0.900794	0.967471	si:dkey-31c13.1	100002197		si:dkey-31c13.1 [Source:ZFIN	Acc:ZDB-GENE-141222-57]	si:dkey-31c13.1	15	GO:0003700(molecular_function) ): :DNA-binding transcription factor activity,GO:0006355(biological_process) ): :regulation of DNA-templated transcription,() ): :
ENSDARG00000060687	23.54	24.76	24.33	23.24	21.02	28.84	1472.06	-0.012526	0.112467	0.900361	0.967373	chd2	569795		chromodomain helicase DNA binding protein 2 [Source:ZFIN	Acc:ZDB-GENE-050419-256]	chd2	18	() ): :
ENSDARG00000062106	15.05	12.42	18.24	13.02	14.81	16.45	167.018	0.0154808	0.164509	0.900344	0.967373	klf5b	560043		KLF transcription factor 5 [Source:HGNC Symbol	Acc:HGNC:6349]	KLF5	9	GO:0005634(cellular_component) ): :nucleus,GO:0000978(molecular_function) ): :RNA polymerase II cis-regulatory region sequence-specific DNA binding,GO:0006357(biological_process) ): :regulation of transcription by RNA polymerase II,GO:0000981(molecular_function) ): :DNA-binding transcription factor activity, RNA polymerase II-specific,GO:0009653(biological_process) ): :anatomical structure morpho…
ENSDARG00000068729	11.71	8.89	12.98	12.78	11.69	7.47	215.571	0.0155919	0.181858	0.900372	0.967373	eif2ak2	100001092		eukaryotic translation initiation factor 2-alpha kinase 2 [Source:ZFIN	Acc:ZDB-GENE-080422-1]	eif2ak2	13	() ): :
ENSDARG00000010658	23.84	16.88	23.24	18.89	23.24	19.58	549.745	0.0150819	0.14965	0.900193	0.967349	insig1	334189		insulin induced gene 1 [Source:ZFIN	Acc:ZDB-GENE-030131-6121]	insig1	7	GO:0016020(cellular_component) ): :membrane,GO:0006629(biological_process) ): :lipid metabolic process,GO:0005783(cellular_component) ): :endoplasmic reticulum,GO:0005789(cellular_component) ): :endoplasmic reticulum membrane,GO:0008202(biological_process) ): :steroid metabolic process,GO:0008203(biological_process) ): :cholesterol metabolic process,() ): :
ENSDARG00000053194	20.98	22.12	21.52	19.94	25.56	16.3	226.293	0.0149714	0.171716	0.900212	0.967349	pdzd11	405893		PDZ domain containing 11 [Source:ZFIN	Acc:ZDB-GENE-040426-2544]	pdzd11	14	GO:0005737(cellular_component) ): :cytoplasm
ENSDARG00000092073	5.03	4.02	4.36	1.82	5.75	4.61	13.0559	0.00986849	0.230978	0.900215	0.967349						22	() ): :
ENSDARG00000027676	6.31	6.15	7.63	6.2	6.16	6.92	46.6832	0.0147774	0.199949	0.899954	0.96733	LOC100005423	100005423				8	() ): :
ENSDARG00000070545	49.59	39.99	47.4	47.95	44.08	41.04	1609.36	0.0136157	0.125161	0.900026	0.96733	top1a	553496		DNA topoisomerase Ia [Source:ZFIN	Acc:ZDB-GENE-060616-217]	top1a	11	() ): :
ENSDARG00000087191	0.89	0.77	0.42	0.78	0.89	0.45	19.4871	-0.0102644	0.227674	0.899941	0.96733	wdr93	100149569				7	GO:0022900(biological_process) ): :electron transport chain,() ): :
ENSDARG00000087545	4.34	3.94	4.29	3.49	2.88	6.89	31.249	-0.0123684	0.217243	0.899982	0.96733				F-box protein 42 [Source:HGNC Symbol	Acc:HGNC:29249]	FBXO42	22	() ): :
ENSDARG00000094171	21.25	21.94	16.23	19.36	20.53	19.84	547.314	-0.0144107	0.146785	0.899983	0.96733						22	() ): :
ENSDARG00000111946	1.41	4.07	0.64	1.74	1.95	1.83	5.25994	0.00677064	0.238945	0.899947	0.96733						22	() ): :
ENSDARG00000113301	1.29	1.37	0.88	0.8	1.66	1.27	7.0837	-0.0078572	0.235772	0.900063	0.96733						4	() ): :
ENSDARG00000074796	1.27	1.49	1.44	1.41	1.03	1.94	35.279	-0.0132296	0.211365	0.899703	0.967314	dbf4	799015		DBF4-CDC7 kinase regulatory subunit [Source:ZFIN	Acc:ZDB-GENE-091020-13]	dbf4	16	GO:0005634(cellular_component) ): :nucleus,GO:0046872(molecular_function) ): :metal ion binding,GO:0003676(molecular_function) ): :nucleic acid binding,GO:0008270(molecular_function) ): :zinc ion binding,GO:0007049(biological_process) ): :cell cycle,GO:0043539(molecular_function) ): :protein serine/threonine kinase activator activity,GO:0010571(biological_process) ): :positive regulation of nucle…
ENSDARG00000088298	3.37	4.66	6.52	3.16	5	6.71	139.843	-0.0145932	0.19528	0.899736	0.967314						17	() ): :
ENSDARG00000079457	1.13	1.05	1.31	1.37	0.92	1.31	33.7301	-0.0133123	0.210833	0.899623	0.967289	faap100	100001169				12	() ): :
ENSDARG00000055792	16.22	16.13	20.19	17.55	15.9	19.22	504.884	-0.0136486	0.126607	0.899411	0.967163	foxo4	563719		forkhead box O4 [Source:HGNC Symbol	Acc:HGNC:7139]	FOXO4	14	GO:0003677(molecular_function) ): :DNA binding,GO:0003700(molecular_function) ): :DNA-binding transcription factor activity,GO:0006355(biological_process) ): :regulation of DNA-templated transcription,GO:0005634(cellular_component) ): :nucleus,GO:0000978(molecular_function) ): :RNA polymerase II cis-regulatory region sequence-specific DNA binding,GO:0006357(biological_process) ): :regulation of t…
ENSDARG00000069594	8.08	6.9	6.1	5.94	6.1	8.65	406.259	0.0152673	0.15227	0.899461	0.967163	kif13a	100331282		kinesin family member 13A [Source:HGNC Symbol	Acc:HGNC:14566]	KIF13A	16	() ): :
ENSDARG00000088124	3.85	3.72	4.81	3.95	4.98	3.39	211.883	-0.0152379	0.170973	0.899444	0.967163	adrb2a	565838		adrenoceptor beta 2, surface a [Source:ZFIN	Acc:ZDB-GENE-100414-3]	adrb2a	14	() ): :
ENSDARG00000031875	0.23	0.34	0.35	0.08	0.42	0.38	13.7543	0.00928606	0.23306	0.899225	0.967054	trpa1b	474353		transient receptor potential cation channel, subfamily A, member 1b [Source:ZFIN	Acc:ZDB-GENE-050106-1]	trpa1b	24	() ): :
ENSDARG00000036592	3.83	4.81	4.74	4.22	5.05	3.43	78.3661	0.0153151	0.193243	0.89918	0.967054	setd4	564058		SET domain containing 4 [Source:ZFIN	Acc:ZDB-GENE-050808-2]	setd4	1	() ): :
ENSDARG00000098353	9.88	11.55	9.59	15.03	6.78	10.06	70.6596	-0.0141008	0.203486	0.899156	0.967054						3	() ): :
ENSDARG00000022905	8.52	9.36	7.54	4.03	9.89	10.32	57.2196	0.0141064	0.210466	0.898732	0.967044	LOC794515	794515				22	() ): :
ENSDARG00000031533	2.31	2.08	2.48	1.84	2.18	2.57	39.74	0.0144755	0.205417	0.898981	0.967044	ap5m1	553681		adaptor related protein complex 5 subunit mu 1 [Source:ZFIN	Acc:ZDB-GENE-050522-231]	ap5m1	17	() ): :
ENSDARG00000034211	0.04	0.95	0.27	0.05	0.59	0.49	10.1082	0.00657265	0.239395	0.898999	0.967044	capn2l	445091		calpain 2, (m/II) large subunit, like [Source:ZFIN	Acc:ZDB-GENE-050417-341]	capn2l	22	GO:0016787(molecular_function) ): :hydrolase activity,GO:0006508(biological_process) ): :proteolysis,GO:0016020(cellular_component) ): :membrane,GO:0005737(cellular_component) ): :cytoplasm,GO:0005886(cellular_component) ): :plasma membrane,GO:0046872(molecular_function) ): :metal ion binding,GO:0005509(molecular_function) ): :calcium ion binding,GO:0008233(molecular_function) ): :peptidase activ…
ENSDARG00000043976	60.11	61.98	80.71	77.41	64.47	53.36	987.093	0.0153328	0.151238	0.89902	0.967044	etf1b	266989		eukaryotic translation termination factor 1b [Source:ZFIN	Acc:ZDB-GENE-021029-1]	etf1b	10	() ): :
ENSDARG00000044767	1.12	1.15	1.12	1.2	0.3	1.77	19.1206	0.0103508	0.2298	0.898833	0.967044	LOC799194	799194		tetraspanin 10 [Source:HGNC Symbol	Acc:HGNC:29942]	TSPAN10	3	() ): :
ENSDARG00000058349	10.53	13.86	17.19	10.1	14.62	14.85	43.5324	0.0142792	0.207688	0.89907	0.967044	polr2l	553705		RNA polymerase II, I and III subunit L [Source:ZFIN	Acc:ZDB-GENE-050522-181]	polr2l	7	GO:0003677(molecular_function) ): :DNA binding,GO:0046872(molecular_function) ): :metal ion binding,GO:0008270(molecular_function) ): :zinc ion binding,GO:0003899(molecular_function) ): :DNA-directed 5'-3' RNA polymerase activity,GO:0006351(biological_process) ): :DNA-templated transcription,GO:0001054(molecular_function) ): :RNA polymerase I activity,GO:0005736(cellular_component) ): :RNA polyme…
ENSDARG00000059855	0.54	0.39	0.43	0.29	0.6	0.35	11.1564	0.00971868	0.231884	0.898751	0.967044	cfap251	569257				5	() ): :
ENSDARG00000075332	2.58	3.36	2.15	2.21	1.85	3.63	12.4182	0.0100637	0.230325	0.899081	0.967044						8	() ): :
ENSDARG00000087556	0.83	0.63	1.07	1.03	0.77	0.47	6.35778	0.00793223	0.236583	0.89882	0.967044	pacrg	492757		PARK2 co-regulated [Source:ZFIN	Acc:ZDB-GENE-041114-100]	pacrg	17	() ): :
ENSDARG00000096939	0.83	0.48	0.64	0.81	0.57	0.69	11.2931	-0.00958379	0.230976	0.898768	0.967044						11	() ): :
ENSDARG00000104126	35.01	29.14	36.11	33.31	35.71	31.18	222.061	-0.0150384	0.154248	0.898875	0.967044	ccpg1	103908643		cell cycle progression 1 [Source:ZFIN	Acc:ZDB-GENE-041114-136]	ccpg1	18	() ): :
ENSDARG00000007480	4.69	2.96	0.95	6.95	0.05	0.28	48.0311	0.00482362	0.24222	0.898313	0.966992	rpe65a	393724		retinoid isomerohydrolase RPE65 a [Source:NCBI gene (formerly Entrezgene)	Acc:393724]	rpe65a	2	() ): :
ENSDARG00000014138	6.29	4.58	6.66	6.55	5.15	5.12	77.2943	0.0155179	0.190725	0.898541	0.966992	acot8	450052		acyl-CoA thioesterase 8 [Source:ZFIN	Acc:ZDB-GENE-041010-174]	acot8	11	() ): :
ENSDARG00000018478	0.98	0.69	0.42	0.4	1.27	0.08	8.31289	0.00726478	0.238137	0.898519	0.966992	agxtb	79378		alanine--glyoxylate and serine--pyruvate aminotransferase b [Source:ZFIN	Acc:ZDB-GENE-010302-3]	agxtb	2	() ): :
ENSDARG00000036158	6.83	7.27	8.93	7.79	7.61	6.77	155.383	0.0158738	0.166144	0.898429	0.966992	nudcd1	553654		NudC domain containing 1 [Source:ZFIN	Acc:ZDB-GENE-050522-483]	nudcd1	19	() ): :
ENSDARG00000067593	14.34	15.11	17.48	12.9	16.45	17.94	158.362	-0.0153299	0.164243	0.898533	0.966992	sco1	796572		synthesis of cytochrome C oxidase 1 [Source:ZFIN	Acc:ZDB-GENE-140909-1]	sco1	3	GO:0046872(molecular_function) ): :metal ion binding,GO:0005739(cellular_component) ): :mitochondrion,GO:0033617(biological_process) ): :mitochondrial cytochrome c oxidase assembly
ENSDARG00000094172	4.7	2.79	0	0	6.84	1.22	6.90012	-0.00478689	0.241601	0.898354	0.966992						5	() ): :
ENSDARG00000111856	0	18.79	0	0	14.55	12.2	23.9881	-0.00177767	0.244184	0.898443	0.966992	LOC101886973	101886973				22	() ): :
ENSDARG00000021288	13.39	14.64	16.38	14.6	13.33	16.83	245.767	-0.0146945	0.1442	0.898214	0.966977	mier3b	567247		mesoderm induction early response 1, family member 3 b [Source:ZFIN	Acc:ZDB-GENE-070424-65]	mier3b	8	() ): :
ENSDARG00000099515	12.91	13.13	13.68	14.74	12.12	13	279.754	-0.0146663	0.142711	0.898154	0.966961	ephx4	100331939		epoxide hydrolase 4 [Source:HGNC Symbol	Acc:HGNC:23758]	EPHX4	6	GO:0004301(molecular_function) ): :epoxide hydrolase activity,GO:0016787(molecular_function) ): :hydrolase activity,GO:0016020(cellular_component) ): :membrane,GO:0003824(molecular_function) ): :catalytic activity
ENSDARG00000074663	2.48	2.72	3.36	3.28	2.73	2.14	74.745	0.0154393	0.194538	0.897981	0.966823	samd8	100037314		sterile alpha motif domain containing 8 [Source:ZFIN	Acc:ZDB-GENE-070410-30]	samd8	17	GO:0016020(cellular_component) ): :membrane,GO:0016740(molecular_function) ): :transferase activity,GO:0033188(molecular_function) ): :sphingomyelin synthase activity,GO:0047493(molecular_function) ): :ceramide cholinephosphotransferase activity,GO:0046513(biological_process) ): :ceramide biosynthetic process,GO:0016780(molecular_function) ): :phosphotransferase activity, for other substituted ph…
ENSDARG00000087585	1.56	3.77	2.44	1.76	1.59	4.1	16.6319	0.0104492	0.229756	0.897903	0.966787				family with sequence similarity 222 member A [Source:HGNC Symbol	Acc:HGNC:25915]	FAM222A	10	() ): :
ENSDARG00000011818	0.25	6.18	2.27	6.6	0.47	0.66	10.3104	0.00626634	0.24002	0.897811	0.966765	batf	564589		basic leucine zipper transcription factor, ATF-like [Source:NCBI gene (formerly Entrezgene)	Acc:564589]	batf	20	() ): :
ENSDARG00000020235	5.5	4.08	3.66	3.28	4.96	4.43	110.087	0.015687	0.188977	0.897839	0.966765	septin9a	337243		septin 9a [Source:ZFIN	Acc:ZDB-GENE-030131-9187]	septin9a	3	() ): :
ENSDARG00000041569	0.45	0.92	0.36	0.35	0.82	0.67	8.75647	-0.00817024	0.235278	0.897717	0.966749	ces2a	566132		carboxylesterase 2a [Source:ZFIN	Acc:ZDB-GENE-061013-99]	ces2a	18	() ): :
ENSDARG00000054946	1.32	1.06	1.28	0.51	1.63	1.2	13.2186	0.0101693	0.230881	0.897627	0.966749	mc5rb	286835		melanocortin 5b receptor [Source:ZFIN	Acc:ZDB-GENE-021223-4]	mc5rb	16	() ): :
ENSDARG00000069415	0.12	0.1	0.05	0.17	0	0.08	4.16491	0.00561749	0.240882	0.897734	0.966749	col17a1a	557257		collagen, type XVII, alpha 1a [Source:ZFIN	Acc:ZDB-GENE-090313-107]	col17a1a	1	() ): :
ENSDARG00000078536	46.5	46.66	49.92	46.31	44.84	52.05	805.866	-0.0122421	0.106489	0.897653	0.966749	si:ch211-158d24.2	560805				8	() ): :
ENSDARG00000105433	0.49	0.74	0.27	0.94	0.35	0.4	5.09933	-0.00652603	0.238802	0.897724	0.966749	zgc:172143	568775		zgc:172143 [Source:ZFIN	Acc:ZDB-GENE-080219-22]	zgc:172143	7	GO:0005575(cellular_component) ): :cellular_component,GO:0008150(biological_process) ): :biological_process,GO:0003674(molecular_function) ): :molecular_function,() ): :
ENSDARG00000105075	3.2	2.71	3.74	2.85	3.49	3.41	72.5183	-0.0152795	0.188883	0.897471	0.966707	LOC108181150	108181150				22	() ): :
ENSDARG00000056680	19.82	22.07	18.36	21.38	21.19	15.45	396.639	0.0158913	0.161005	0.897318	0.96659	stc2a	544665		stanniocalcin 2a [Source:ZFIN	Acc:ZDB-GENE-041008-14]	stc2a	14	() ): :
ENSDARG00000019763	1.07	1.12	0.45	1.04	0.71	1.08	7.54871	-0.00793697	0.23596	0.897086	0.966523	acp5a	406801		acid phosphatase 5a, tartrate resistant [Source:ZFIN	Acc:ZDB-GENE-040426-2864]	acp5a	6	() ): :
ENSDARG00000022623	10.42	11.69	13.69	15.4	10.02	8.78	127.698	0.0158312	0.18796	0.89709	0.966523	fbxo44.1	494034		F-box protein 44, tandem duplicate 1 [Source:ZFIN	Acc:ZDB-GENE-041212-85]	fbxo44.1	23	() ): :
ENSDARG00000091144	0.15	0.91	0.67	0.73	0.11	1.34	6.20063	-0.00637318	0.239267	0.897181	0.966523						16	() ): :
ENSDARG00000100119	58.91	49.33	55.77	39.33	44.94	76.96	713.705	0.0159537	0.161239	0.897142	0.966523	caskb	100148073		calcium/calmodulin-dependent serine protein kinase b [Source:ZFIN	Acc:ZDB-GENE-030131-4473]	caskb	6	() ): :
ENSDARG00000100452	40.21	36.37	47.16	33.61	49.64	40.3	439.892	-0.0152177	0.155126	0.897211	0.966523	nop53	322404		NOP53 ribosome biogenesis factor [Source:ZFIN	Acc:ZDB-GENE-051120-21]	nop53	15	() ): :
ENSDARG00000058357	1.13	0.71	0.84	0.41	0.51	1.65	12.1422	0.00945753	0.233207	0.896971	0.966505	ankrd33ba	568270		ankyrin repeat domain 33B [Source:HGNC Symbol	Acc:HGNC:35240]	ANKRD33B	24	() ): :
ENSDARG00000058574	4.77	3.14	4.89	3.22	3.74	5.53	45.427	0.0145575	0.207409	0.896919	0.966505	abcg2c	569858		ATP-binding cassette, sub-family G (WHITE), member 2c [Source:ZFIN	Acc:ZDB-GENE-050517-37]	abcg2c	13	() ): :
ENSDARG00000062650	13.04	13.4	18.29	14.32	15.42	14.86	1153.29	-0.0141696	0.131319	0.896861	0.966505	rif1	567001		replication timing regulatory factor 1 [Source:ZFIN	Acc:ZDB-GENE-030131-3406]	rif1	9	() ): :
ENSDARG00000063713	35.99	40.53	39.03	36.39	30.09	47.3	1617	0.0140681	0.129252	0.896968	0.966505	syngap1a	100034485		synaptic Ras GTPase activating protein 1 [Source:HGNC Symbol	Acc:HGNC:11497]	SYNGAP1	19	() ): :
ENSDARG00000007018	0.48	1.15	0.54	0.45	0.68	1.3	5.78714	-0.00718497	0.237808	0.896617	0.966429	ms4a17a.6	100009643		membrane-spanning 4-domains, subfamily A, member 17A.6 [Source:ZFIN	Acc:ZDB-GENE-070209-265]	ms4a17a.6	4	() ): :
ENSDARG00000040959	4.78	6.46	8.15	8.27	5.26	4.77	53.0943	0.0145301	0.208207	0.896687	0.966429	rabl3	403048		RAB, member of RAS oncogene family-like 3 [Source:ZFIN	Acc:ZDB-GENE-040808-11]	rabl3	9	() ): :
ENSDARG00000055548	12.04	10.61	13.31	9.57	11.06	14.58	487.987	0.0151629	0.14124	0.896721	0.966429	npat	552973				15	GO:0005634(cellular_component) ): :nucleus,GO:0003712(molecular_function) ): :transcription coregulator activity,() ): :
ENSDARG00000100265	1.74	1.03	1.09	0.9	2.37	0.63	20.4219	-0.0100752	0.229917	0.896699	0.966429	rhcgb	792274		Rh family, C glycoprotein b [Source:ZFIN	Acc:ZDB-GENE-040426-2595]	rhcgb	25	() ): :
ENSDARG00000003827	3.51	2.29	2.21	4.78	1.96	1.48	44.512	-0.0120019	0.221553	0.896442	0.96636	snapc1b	393224		small nuclear RNA activating complex, polypeptide 1b [Source:ZFIN	Acc:ZDB-GENE-040426-716]	snapc1b	13	() ): :
ENSDARG00000020600	6.71	5.97	6.58	7.64	5.42	6.36	173.781	-0.0156153	0.163374	0.896479	0.96636	rnf144aa	570968		ring finger protein 144aa [Source:ZFIN	Acc:ZDB-GENE-041001-88]	rnf144aa	17	() ): :
ENSDARG00000078676	51.45	30.9	29.02	20.12	46.68	39.05	1492.16	0.0139901	0.214921	0.896331	0.966297	myrf	570792		myelin regulatory factor [Source:HGNC Symbol	Acc:HGNC:1181]	MYRF	25	() ): :
ENSDARG00000000476	3.93	5.31	5.15	3.4	5.77	5.37	131.148	-0.0155965	0.185029	0.896233	0.96624	pms1	368631		PMS1 homolog 1, mismatch repair system component [Source:ZFIN	Acc:ZDB-GENE-030616-528]	pms1	9	() ): :
ENSDARG00000038559	118.73	67.62	136.91	106.28	112.75	89.88	1236.08	0.0161034	0.168542	0.896173	0.966223	h1-0	321618		H1.0 linker histone [Source:ZFIN	Acc:ZDB-GENE-030131-337]	h1-0	24	() ): :
ENSDARG00000008772	0.15	0.26	0.03	0.19	0.08	0.23	5.3902	-0.00651825	0.239182	0.896032	0.966166	cacng1a	322013		calcium channel, voltage-dependent, gamma subunit 1a [Source:ZFIN	Acc:ZDB-GENE-030131-732]	cacng1a	6	() ): :
ENSDARG00000009733	17.68	15.88	14.69	11.26	14.16	22.01	725.992	0.0161083	0.161153	0.895926	0.966166	kif21b	570502		kinesin family member 21B [Source:HGNC Symbol	Acc:HGNC:29442]	KIF21B	11	() ): :
ENSDARG00000036105	18.2	15	20.59	14.78	17.88	19.33	135.673	0.0163151	0.169495	0.896075	0.966166	si:dkeyp-92c9.2	571482		si:dkeyp-92c9.2 [Source:ZFIN	Acc:ZDB-GENE-060503-468]	si:dkeyp-92c9.2	19	GO:0005737(cellular_component) ): :cytoplasm,GO:0019901(molecular_function) ): :protein kinase binding,GO:0007411(biological_process) ): :axon guidance,GO:0061575(molecular_function) ): :cyclin-dependent protein serine/threonine kinase activator activity,GO:0030426(cellular_component) ): :growth cone,GO:0007420(biological_process) ): :brain development,GO:0016533(cellular_component) ): :protein k…
ENSDARG00000037652	4.78	3.96	4.71	4.4	3.33	5.36	72.1402	0.0159411	0.190249	0.896005	0.966166	ints15	393295		integrator complex subunit 15 [Source:ZFIN	Acc:ZDB-GENE-040426-1019]	ints15	1	() ): :
ENSDARG00000057484	173.74	192.73	204.28	184.13	175.3	199.63	1814.59	0.0122338	0.101911	0.895746	0.966166	srsf2a	406691		serine and arginine rich splicing factor 2a [Source:ZFIN	Acc:ZDB-GENE-040426-2706]	srsf2a	12	() ): :
ENSDARG00000074565	1.72	2.59	1.89	1.91	1.89	2.61	38.3663	-0.0139212	0.209721	0.896037	0.966166	pusl1	555828				11	() ): :,GO:0003723(molecular_function) ): :RNA binding,GO:0016853(molecular_function) ): :isomerase activity,GO:0009982(molecular_function) ): :pseudouridine synthase activity,GO:0106029(molecular_function) ): :tRNA pseudouridine synthase activity,GO:0001522(biological_process) ): :pseudouridine synthesis,GO:0008033(biological_process) ): :tRNA processing,GO:0009451(biological_process) ): :RNA mo…
ENSDARG00000075542	32.55	27.09	24.95	22.61	26.72	33.72	4158.31	0.0143824	0.135579	0.89601	0.966166	zfhx4	556453		zinc finger homeobox 4 [Source:HGNC Symbol	Acc:HGNC:30939]	ZFHX4	24	GO:0003677(molecular_function) ): :DNA binding,GO:0006355(biological_process) ): :regulation of DNA-templated transcription,GO:0005634(cellular_component) ): :nucleus,GO:0000978(molecular_function) ): :RNA polymerase II cis-regulatory region sequence-specific DNA binding,GO:0003676(molecular_function) ): :nucleic acid binding,GO:0008270(molecular_function) ): :zinc ion binding,GO:0006357(biologic…
ENSDARG00000096312	0.28	0.76	1.01	0.12	0.99	0.8	5.57961	0.00669767	0.239315	0.896062	0.966166						19	() ): :
ENSDARG00000097333	0.16	0.21	0.25	0.2	0.11	0.26	4.64761	0.00722517	0.238411	0.896065	0.966166	si:ch211-213d14.3	101884714				15	() ): :
ENSDARG00000012030	0.36	0.87	0.38	0.81	0.51	0.38	11.9778	-0.00917073	0.232892	0.895551	0.966166	dnaaf1	386722		dynein axonemal assembly factor 1 [Source:ZFIN	Acc:ZDB-GENE-031114-4]	dnaaf1	7	() ): :
ENSDARG00000030872	0.67	0.24	0.77	0.35	0.69	0.74	9.52053	-0.0087736	0.234355	0.895453	0.966166	cetp	492488		cholesteryl ester transfer protein, plasma [Source:ZFIN	Acc:ZDB-GENE-041114-54]	cetp	18	() ): :
ENSDARG00000062753	6.85	9.73	8.07	7.62	7.78	9.81	64.6667	-0.0152917	0.1941	0.895673	0.966166	naif1	562755		nuclear apoptosis inducing factor 1 [Source:ZFIN	Acc:ZDB-GENE-081104-236]	naif1	8	() ): :
ENSDARG00000075952	10.96	8.75	10.84	6.51	11.13	13.54	110.2	-0.0154866	0.190373	0.89551	0.966166	mbd2	337105		methyl-CpG binding domain protein 2 [Source:ZFIN	Acc:ZDB-GENE-030131-9049]	mbd2	5	() ): :
ENSDARG00000078311	16.59	17.29	15.27	14.82	14.81	18.57	527.774	0.0145537	0.129194	0.895628	0.966166	dcaf6	564498		ddb1 and cul4 associated factor 6 [Source:ZFIN	Acc:ZDB-GENE-090206-2]	dcaf6	9	() ): :
ENSDARG00000099766	89.3	114.08	146.18	132.26	105.54	98.84	1221.9	0.0163929	0.154985	0.895333	0.966166	myl12.1	326719		myosin, light chain 12, genome duplicate 1 [Source:ZFIN	Acc:ZDB-GENE-030131-4918]	myl12.1	7	() ): :
ENSDARG00000104292	2.65	1.04	1.76	2.09	1.28	1.81	22.1395	0.0121525	0.224523	0.895622	0.966166	ccn2b	100124530		cellular communication network factor 2b [Source:ZFIN	Acc:ZDB-GENE-070705-82]	ccn2b	19	() ): :
ENSDARG00000105012	8.86	8.31	7.85	7.44	6.82	11.54	73.8485	-0.015408	0.191872	0.895599	0.966166	utp23	550514		UTP23 small subunit processome component [Source:ZFIN	Acc:ZDB-GENE-050417-353]	utp23	19	() ): :
ENSDARG00000115301	42.27	47.81	42.79	40.68	41.47	51.52	1277.38	-0.0133446	0.11712	0.895637	0.966166	lurap1	100126029		leucine rich adaptor protein 1 [Source:ZFIN	Acc:ZDB-GENE-070928-35]	lurap1	6	() ): :
ENSDARG00000061013	11.81	15.04	15.34	12.65	14.15	15.57	610.042	-0.0146637	0.133749	0.895095	0.965976	ankfy1	568480		ankyrin repeat and FYVE domain containing 1 [Source:ZFIN	Acc:ZDB-GENE-041222-1]	ankfy1	5	() ): :
ENSDARG00000068370	43.07	45.13	47.07	50.36	40.61	40.57	1208.83	0.0144885	0.126711	0.894981	0.965976	ralgps1	100101642		Ral GEF with PH domain and SH3 binding motif 1 [Source:ZFIN	Acc:ZDB-GENE-070720-16]	ralgps1	8	() ): :
ENSDARG00000102538	13.85	12.96	12.77	10.17	14.88	14.76	354.235	-0.0155409	0.153182	0.895078	0.965976	mccc1	777632		methylcrotonyl-CoA carboxylase subunit [Source:ZFIN	Acc:ZDB-GENE-050208-450]	mccc1	22	() ): :
ENSDARG00000103623	2.77	2.07	3.1	2.3	2.43	2.8	26.0251	0.0136614	0.216478	0.895009	0.965976	npy7r	449010		neuropeptide Y receptor Y7 [Source:ZFIN	Acc:ZDB-GENE-040924-9]	npy7r	14	() ): :
ENSDARG00000101980	2.75	2.02	1.82	2.96	1.21	2.16	42.7421	0.0139506	0.214851	0.894902	0.965962	bmper	338246		BMP binding endothelial regulator [Source:ZFIN	Acc:ZDB-GENE-030219-146]	bmper	16	() ): :
ENSDARG00000007869	50.75	45.78	50.02	50.46	45.14	47.5	1261.54	0.0131049	0.109524	0.894834	0.965939	ehd3	562949		EH-domain containing 3 [Source:ZFIN	Acc:ZDB-GENE-041014-352]	ehd3	20	() ): :
ENSDARG00000013168	3.05	2.63	3.75	3.49	2.38	3.69	219.25	-0.0158915	0.165225	0.894837	0.965939	jag1b	140423		jagged canonical Notch ligand 1b [Source:ZFIN	Acc:ZDB-GENE-011128-4]	jag1b	13	() ): :
ENSDARG00000043341	0.8	0.85	0.73	0.7	0.75	0.74	8.91431	0.00967862	0.232989	0.894702	0.96589	npy4r	30717		neuropeptide Y receptor Y4 [Source:ZFIN	Acc:ZDB-GENE-980526-393]	npy4r	17	() ): :
ENSDARG00000111350	46.45	59.32	35.39	52.35	45.79	37.14	40.7012	0.0144181	0.211455	0.894647	0.965879				Metazoan signal recognition particle RNA [Source:RFAM	Acc:RF00017]	Metazoa_SRP	11	GO:0006617(biological_process) ): :SRP-dependent cotranslational protein targeting to membrane, signal sequence recognition,GO:0005786(cellular_component) ): :signal recognition particle, endoplasmic reticulum targeting
ENSDARG00000062220	17.94	20.74	15.19	14.12	20.7	19.54	698.08	-0.0157098	0.156527	0.894503	0.965772	plekha7b	100005106		pleckstrin homology domain containing A7 [Source:HGNC Symbol	Acc:HGNC:27049]	PLEKHA7	7	() ): :
ENSDARG00000093608	17.53	27.01	15.72	12.22	26.5	18.41	69.186	0.0146127	0.209703	0.894421	0.965731	ccl34b.1	563952		chemokine (C-C motif) ligand 34b, duplicate 1 [Source:ZFIN	Acc:ZDB-GENE-091204-276]	ccl34b.1	24	() ): :
ENSDARG00000017128	0.23	0.92	0.59	0.87	0.43	0.32	34.7995	0.0115668	0.227245	0.894356	0.96571	myofl	559066		myoferlin [Source:HGNC Symbol	Acc:HGNC:3656]	MYOF	13	() ): :
ENSDARG00000041391	64.75	54.37	65.4	69.97	55.51	53.29	979.916	0.0154569	0.13734	0.894337	0.96571	tmed10	326716		transmembrane p24 trafficking protein 10 [Source:ZFIN	Acc:ZDB-GENE-030131-4915]	tmed10	20	() ): :
ENSDARG00000034528	7.45	6.75	7.74	7.39	8.96	5.63	90.34	-0.0156873	0.190585	0.89423	0.965685	chodl	550240		chondrolectin [Source:NCBI gene (formerly Entrezgene)	Acc:550240]	chodl	24	() ): :
ENSDARG00000068125	12.28	10.57	11.9	11.49	11.54	11.91	147.94	-0.0159059	0.159936	0.894243	0.965685	nfu1	403053		NFU1 iron-sulfur cluster scaffold homolog (S. cerevisiae) [Source:ZFIN	Acc:ZDB-GENE-050417-365]	nfu1	8	() ): :
ENSDARG00000000068	6.44	7.16	8.74	6.25	8.39	7.84	122.777	-0.0162062	0.176136	0.893281	0.965608	slc9a3r1a	327272		NHERF family PDZ scaffold protein 1a [Source:ZFIN	Acc:ZDB-GENE-031006-7]	nherf1a	12	() ): :
ENSDARG00000003952	112.22	112.5	121.85	125.73	104.59	107.16	1386.44	0.014047	0.118222	0.893619	0.965608	pfn2b	394235		profilin 2b [Source:ZFIN	Acc:ZDB-GENE-040115-4]	pfn2b	22	() ): :
ENSDARG00000007186	10.5	8.37	9.92	8.92	9.18	9.68	105.653	0.0169313	0.173459	0.893764	0.965608	ppp1r8a	566830		protein phosphatase 1, regulatory subunit 8a [Source:ZFIN	Acc:ZDB-GENE-060503-681]	ppp1r8a	19	() ): :
ENSDARG00000013681	17.76	17.89	23.37	18.04	21.78	16.89	402.405	0.0162037	0.153352	0.893732	0.965608	shisa10.1	558619		shisa family member 10, tandem duplicate 1 [Source:ZFIN	Acc:ZDB-GENE-030131-6596]	shisa10.1	22	() ): :
ENSDARG00000016122	2.12	1.36	3.09	1.45	2.7	2.66	19.5335	-0.0114721	0.225763	0.89406	0.965608	ptrhd1	563207		peptidyl-tRNA hydrolase domain containing 1 [Source:ZFIN	Acc:ZDB-GENE-081110-2]	ptrhd1	20	() ): :
ENSDARG00000024693	9.49	7.33	11.09	8.5	8.62	9.82	142.862	0.0163595	0.168662	0.893812	0.965608	lysmd3	415194		LysM, putative peptidoglycan-binding, domain containing 3 [Source:ZFIN	Acc:ZDB-GENE-040625-88]	lysmd3	5	() ): :
ENSDARG00000025576	30.56	30.75	41.32	30.89	30.2	42.48	627.879	-0.0150763	0.139982	0.894083	0.965608	mkln1	325217		muskelin 1, intracellular mediator containing kelch motifs [Source:ZFIN	Acc:ZDB-GENE-030131-3942]	mkln1	4	() ): :
ENSDARG00000041141	1.26	1.79	2.72	0.83	1.59	3.82	13.9035	-0.00959126	0.232431	0.893567	0.965608	cryba1a	436683		crystallin, beta A1a [Source:ZFIN	Acc:ZDB-GENE-040718-107]	cryba1a	15	() ): :
ENSDARG00000053646	1.49	1.77	1.03	0.97	1.26	2.32	25.6045	-0.0121586	0.222472	0.89395	0.965608	adrb3a	558248		adrenoceptor beta 3a [Source:ZFIN	Acc:ZDB-GENE-080917-21]	adrb3a	8	() ): :
ENSDARG00000054181	1.07	1.05	0.82	0.92	0.93	0.87	10.761	0.0104614	0.231094	0.893567	0.965608	valopb	560921		vertebrate ancient long opsin b [Source:ZFIN	Acc:ZDB-GENE-040724-41]	valopb	12	() ): :
ENSDARG00000059925	17.41	17.91	18.27	16.21	14.81	21.71	1270.07	0.0141239	0.12114	0.893436	0.965608	usp24	325631				20	() ): :,GO:0016787(molecular_function) ): :hydrolase activity,GO:0005829(cellular_component) ): :cytosol,GO:0005634(cellular_component) ): :nucleus,GO:0008233(molecular_function) ): :peptidase activity,GO:0006508(biological_process) ): :proteolysis,GO:0008234(molecular_function) ): :cysteine-type peptidase activity,GO:0004843(molecular_function) ): :cysteine-type deubiquitinase activity,GO:190488…
ENSDARG00000067564	12.32	11.58	12.24	15.5	11.3	9.89	57.6016	-0.0152591	0.1998	0.893561	0.965608	zgc:153044	751678		zgc:153044 [Source:ZFIN	Acc:ZDB-GENE-060825-247]	zgc:153044	5	() ): :
ENSDARG00000070781	6.11	4.49	6.27	5.3	4.5	6.65	178.489	0.0166069	0.165725	0.89366	0.965608	gjd2b	378444		gap junction protein delta 2b [Source:ZFIN	Acc:ZDB-GENE-030911-1]	gjd2b	20	() ): :
ENSDARG00000071683	9.21	12.16	11.41	11.39	10.59	10.91	464.088	-0.0151046	0.139724	0.893956	0.965608	zfr2	567465		zinc finger RNA binding protein 2 [Source:HGNC Symbol	Acc:HGNC:29189]	ZFR2	22	() ): :
ENSDARG00000089794	1.84	0	1.35	0	2.17	0	8.4151	0.00266276	0.24403	0.893635	0.965608						24	() ): :
ENSDARG00000092478	27.42	30.88	24.04	17.89	18.34	46.05	87.1826	0.0150859	0.206135	0.894015	0.965608	sdhaf1	606612				21	GO:0005739(cellular_component) ): :mitochondrion,GO:0003674(molecular_function) ): :molecular_function,GO:0034553(biological_process) ): :mitochondrial respiratory chain complex II assembly,() ): :
ENSDARG00000092872	0.39	1.66	0.88	1.61	0.31	1.28	14.706	-0.00876353	0.234519	0.893891	0.965608	upk3b	798916		uroplakin 3b [Source:ZFIN	Acc:ZDB-GENE-060526-348]	upk3b	5	() ): :
ENSDARG00000101722	8.31	8.67	7.89	6.76	7.16	10.46	233.739	0.0162917	0.158244	0.893988	0.965608	larp1	327175		La ribonucleoprotein 1, translational regulator [Source:HGNC Symbol	Acc:HGNC:29531]	LARP1	21	() ): :
ENSDARG00000101888	3.73	3.62	4.37	3.94	3.85	3.98	194.338	-0.0157027	0.150687	0.893634	0.965608	oscp1b	100334608		organic solute carrier partner 1 [Source:HGNC Symbol	Acc:HGNC:29971]	OSCP1	16	() ): :
ENSDARG00000042613	0.17	2.86	0.45	0.21	2.09	0.68	6.0616	0.00616901	0.240537	0.893165	0.965533	crp3	100141350		C-reactive protein 3 [Source:ZFIN	Acc:ZDB-GENE-060503-220]	crp3	24	() ): :
ENSDARG00000003903	14.45	10.25	11.2	9.06	14.92	12.26	111.463	-0.0160556	0.188828	0.892883	0.965487	hapln2	558291		hyaluronan and proteoglycan link protein 2 [Source:ZFIN	Acc:ZDB-GENE-030131-8089]	hapln2	16	() ): :
ENSDARG00000014506	7.08	6.43	11.62	9.77	7.57	6.38	57.7538	0.0153495	0.205674	0.893077	0.965487	tmem126a	393771		transmembrane protein 126A [Source:ZFIN	Acc:ZDB-GENE-040426-1770]	tmem126a	10	() ): :
ENSDARG00000020123	22.78	22.4	20.87	22.86	19.09	22.69	700.292	0.0134518	0.122375	0.89302	0.965487	coq8aa	437001		coenzyme Q8A, genome duplicate a [Source:ZFIN	Acc:ZDB-GENE-040718-487]	coq8aa	20	() ): :
ENSDARG00000061108	19.75	20.56	19.85	15.79	17.46	25.95	1970.65	0.0157305	0.136264	0.892945	0.965487	ep300b	565612		E1A binding protein p300 [Source:HGNC Symbol	Acc:HGNC:3373]	EP300	3	() ): :
ENSDARG00000082753	64574.6	80575.3	77506.9	73991.6	76815.6	71554.1	571654	-0.0135728	0.117501	0.893053	0.965487						MT	() ): :
ENSDARG00000101717	0.23	0.25	0.18	0.25	0.06	0.31	5.94909	0.00779574	0.23774	0.893014	0.965487	sox17	30544		SRY-box transcription factor 17 [Source:ZFIN	Acc:ZDB-GENE-991213-1]	sox17	7	GO:0003677(molecular_function) ): :DNA binding,GO:0005634(cellular_component) ): :nucleus,GO:0000978(molecular_function) ): :RNA polymerase II cis-regulatory region sequence-specific DNA binding,GO:0001228(molecular_function) ): :DNA-binding transcription activator activity, RNA polymerase II-specific,GO:0045944(biological_process) ): :positive regulation of transcription by RNA polymerase II,GO:…
ENSDARG00000003531	21.55	18.85	24.24	16.01	24.98	21.28	394.961	0.0165461	0.158423	0.892624	0.965286	tcea1	336105		transcription elongation factor A (SII), 1 [Source:ZFIN	Acc:ZDB-GENE-030131-8049]	tcea1	2	() ): :
ENSDARG00000057497	50.58	41.31	62.72	52.38	48.94	48.12	801.648	0.0154265	0.138779	0.892591	0.965286	stk35l	494084		serine/threonine kinase 35, like [Source:ZFIN	Acc:ZDB-GENE-041212-52]	stk35l	6	() ): :
ENSDARG00000058451	522.95	513.84	557.15	473.86	634.05	480.54	3659.07	-0.0124763	0.135248	0.8925	0.965249	rpl6	336727		ribosomal protein L6 [Source:ZFIN	Acc:ZDB-GENE-030131-8671]	rpl6	8	() ): :
ENSDARG00000001969	14	10.92	13.63	14	10.49	14.5	241.376	-0.0162489	0.154651	0.892385	0.965173	txlng	324984		taxilin gamma [Source:ZFIN	Acc:ZDB-GENE-060616-122]	txlng	11	() ): :
ENSDARG00000027586	4.9	4.92	4.52	4.16	4.82	4.93	213.586	0.0163254	0.151457	0.892303	0.965133	top3b	793414		DNA topoisomerase III beta [Source:HGNC Symbol	Acc:HGNC:11993]	TOP3B	5	GO:0003677(molecular_function) ): :DNA binding,GO:0005634(cellular_component) ): :nucleus,GO:0016853(molecular_function) ): :isomerase activity,GO:0003917(molecular_function) ): :DNA topoisomerase type I (single strand cut, ATP-independent) activity,GO:0006265(biological_process) ): :DNA topological change,GO:0003916(molecular_function) ): :DNA topoisomerase activity
ENSDARG00000110147	1.31	1.53	1.32	0.98	1.66	1.31	79.0867	0.0163366	0.194792	0.89196	0.96481	zgc:85789	322350		zgc:85789 [Source:NCBI gene (formerly Entrezgene)	Acc:322350]	C5H11orf54	5	GO:0005634(cellular_component) ): :nucleus,GO:0016787(molecular_function) ): :hydrolase activity,GO:0046872(molecular_function) ): :metal ion binding,GO:0008270(molecular_function) ): :zinc ion binding,GO:0016788(molecular_function) ): :hydrolase activity, acting on ester bonds
ENSDARG00000006383	94.02	95.34	93.84	91.45	81.66	111.86	3318.63	-0.0129346	0.106539	0.891466	0.964632	stxbp5l	567605		syntaxin binding protein 5L [Source:NCBI gene (formerly Entrezgene)	Acc:567605]	stxbp5l	9	() ): :
ENSDARG00000014274	4.5	4.81	5.7	4.23	4.2	6.11	63.6401	0.0164803	0.193155	0.891474	0.964632	rfc2	503748		replication factor C (activator 1) 2 [Source:ZFIN	Acc:ZDB-GENE-050306-29]	rfc2	21	() ): :
ENSDARG00000022952	16.77	16.82	19.66	20.01	14.96	18.48	763.056	-0.0146808	0.128067	0.891751	0.964632	zgc:66448	327401		zgc:66448 [Source:ZFIN	Acc:ZDB-GENE-030131-5612]	zgc:66448	16	() ): :
ENSDARG00000030215	0.1	0.66	0.13	0.53	0.05	0.44	6.23263	-0.00633278	0.239922	0.891319	0.964632	matn1	403023		matrilin 1 [Source:ZFIN	Acc:ZDB-GENE-050307-3]	matn1	19	GO:0005509(molecular_function) ): :calcium ion binding,GO:0062023(cellular_component) ): :collagen-containing extracellular matrix,GO:0051216(biological_process) ): :cartilage development,GO:0048856(biological_process) ): :anatomical structure development,() ): :
ENSDARG00000030949	11.6	16.34	16.3	16.13	13.82	12.5	137.815	0.0169528	0.177754	0.891599	0.964632	srprb	436845		SRP receptor subunit beta [Source:ZFIN	Acc:ZDB-GENE-040718-311]	srprb	15	() ): :
ENSDARG00000053082	4.42	4.64	5.06	4.29	4.63	4.82	285.585	0.0156014	0.137624	0.891732	0.964632	thada	541356		THADA armadillo repeat containing [Source:ZFIN	Acc:ZDB-GENE-050320-49]	thada	13	() ): :
ENSDARG00000073858	7.71	4.95	6.04	6.73	6.16	4.94	96.0779	0.0166416	0.190035	0.891399	0.964632	pex26	334644		peroxisomal biogenesis factor 26 [Source:ZFIN	Acc:ZDB-GENE-030131-6584]	pex26	4	() ): :
ENSDARG00000074599	14.47	9.92	11.91	11.65	14.14	10.53	375.437	-0.0169764	0.162819	0.891562	0.964632	frmd4ba	100333566		FERM domain containing 4B [Source:HGNC Symbol	Acc:HGNC:24886]	FRMD4B	6	() ): :
ENSDARG00000089563	0.4	0.41	0.27	0.29	0.09	0.84	18.1428	-0.00944942	0.233334	0.891271	0.964632	sfrp2l	100538205				15	() ): :
ENSDARG00000101352	0.08	0.32	0.15	0.05	0.12	0.38	5.13463	0.00680061	0.239642	0.891698	0.964632	LOC799644	799644				16	() ): :
ENSDARG00000104344	9.88	13.51	13.38	9.14	9.69	17.13	171.692	0.0164048	0.181977	0.891669	0.964632	ccdc127a	751722		coiled-coil domain containing 127a [Source:ZFIN	Acc:ZDB-GENE-060825-61]	ccdc127a	16	() ): :
ENSDARG00000115982	4.74	3.52	10.4	5.8	5.55	8.7	8.96319	-0.00908814	0.234426	0.891493	0.964632						KN149749.1	() ): :
ENSDARG00000040179	1.41	1.17	1.57	1.17	1.18	1.56	15.9328	0.0123264	0.225442	0.891131	0.96454	zgc:101562	792098		zgc:101562 [Source:ZFIN	Acc:ZDB-GENE-041010-74]	zgc:101562	20	() ): :
ENSDARG00000041006	4.71	5.1	4.95	4.18	5.24	5.54	88.2463	-0.0164731	0.181206	0.891111	0.96454	st3gal4	504044		ST3 beta-galactoside alpha-2,3-sialyltransferase 4 [Source:ZFIN	Acc:ZDB-GENE-050309-174]	st3gal4	18	() ): :
ENSDARG00000076913	0.45	1.03	1.64	0.49	0.12	2.99	14.2282	-0.00724469	0.23821	0.890838	0.96432	eme1	558350				12	() ): :,GO:0003677(molecular_function) ): :DNA binding,GO:0005634(cellular_component) ): :nucleus,GO:0016787(molecular_function) ): :hydrolase activity,GO:0006281(biological_process) ): :DNA repair,GO:0004518(molecular_function) ): :nuclease activity,GO:0006974(biological_process) ): :cellular response to DNA damage stimulus,GO:0004519(molecular_function) ): :endonuclease activity,GO:0008821(mole…
ENSDARG00000079364	0.61	1.31	0.93	0.89	0.67	1.08	8.35607	0.00949834	0.23446	0.890789	0.964316	LOC103910036	103910036				2	() ): :
ENSDARG00000018312	4.62	5.26	4.63	5.01	5.66	3.89	126.765	-0.0165491	0.180997	0.890591	0.964149	rell1	799556		RELT like 1 [Source:ZFIN	Acc:ZDB-GENE-161213-2]	rell1	7	GO:0016020(cellular_component) ): :membrane,GO:0005886(cellular_component) ): :plasma membrane,GO:1900745(biological_process) ): :positive regulation of p38MAPK cascade
ENSDARG00000058062	5.33	6.62	8.27	5.75	6.14	7.58	83.9923	0.0168649	0.187265	0.89055	0.964149	magt1	324944		magnesium transporter 1 [Source:ZFIN	Acc:ZDB-GENE-030131-3667]	magt1	14	() ): :
ENSDARG00000061216	4.83	5.57	4.78	4.9	4.96	5.55	89.6341	-0.0165617	0.179698	0.890566	0.964149	hexdc	565372		hexosaminidase d [Source:ZFIN	Acc:ZDB-GENE-060929-448]	hexd	12	() ): :
ENSDARG00000027564	8.2	7.93	8.46	7.39	6.91	9.74	197.571	0.0166608	0.153028	0.890358	0.964129	LOC100536197	100536197		p21 (RAC1) activated kinase 6 [Source:HGNC Symbol	Acc:HGNC:16061]	PAK6	17	() ): :
ENSDARG00000061021	1.95	3.04	2.36	3.12	1.16	2.86	131.53	0.0159801	0.202943	0.890322	0.964129	fhip1aa	100000787		FHF complex subunit HOOK interacting protein 1A [Source:HGNC Symbol	Acc:HGNC:34237]	FHIP1A	1	() ): :
ENSDARG00000075209	12.75	15.34	13.71	10.92	13.97	17.48	459.675	-0.0161527	0.150196	0.890439	0.964129	p4htmb	799930		prolyl 4-hydroxylase, transmembrane [Source:HGNC Symbol	Acc:HGNC:28858]	P4HTM	6	() ): :
ENSDARG00000117695	2.76	2.9	2.86	3.96	1.73	2.5	94.981	0.016322	0.19867	0.89043	0.964129						13	() ): :
ENSDARG00000002304	0.71	0.45	1.15	0.7	0.93	0.37	4.77901	0.00754705	0.238645	0.890113	0.963989	gins2	554146		GINS complex subunit 2 [Source:ZFIN	Acc:ZDB-GENE-050419-19]	gins2	18	() ): :
ENSDARG00000098984	16.14	18.12	16.62	23	12.72	15.83	305.283	-0.0166488	0.171206	0.890131	0.963989	pid1	541377		phosphotyrosine interaction domain containing 1 [Source:ZFIN	Acc:ZDB-GENE-050320-72]	pid1	18	() ): :
ENSDARG00000004956	14.79	16.77	19.54	15.03	16.49	17.97	172.327	0.0169351	0.158945	0.889994	0.963958	zmat2	324476		zinc finger, matrin-type 2 [Source:ZFIN	Acc:ZDB-GENE-030131-3197]	zmat2	21	() ): :
ENSDARG00000057166	1.5	1.17	1.07	1.02	1.29	1.17	16.4556	0.0124338	0.225557	0.889965	0.963958	lrmda	553730		leucine rich melanocyte differentiation associated [Source:ZFIN	Acc:ZDB-GENE-050522-285]	lrmda	13	() ): :
ENSDARG00000099487	48.17	42.81	51.43	39.11	42.61	57.88	1102.45	0.0152561	0.12765	0.889883	0.963958						14	() ): :
ENSDARG00000101094	6.72	6.78	5.7	5.55	5.49	8.56	430.445	-0.0163013	0.153221	0.890013	0.963958	si:dkey-211e20.10	100329583		ATPase phospholipid transporting 11B (putative) [Source:HGNC Symbol	Acc:HGNC:13553]	ATP11B	22	() ): :
ENSDARG00000000489	8.93	8.68	9.99	9.21	8.1	9.45	137.064	0.0170493	0.161806	0.889657	0.963765	upf3b	393929		UPF3B regulator of nonsense mediated mRNA decay [Source:ZFIN	Acc:ZDB-GENE-040426-1630]	upf3b	14	() ): :
ENSDARG00000101434	1.76	1.01	1.6	1.68	1.65	1.25	10.341	-0.0101545	0.232023	0.889508	0.963652	slc39a3	792986		solute carrier family 39 member 3 [Source:ZFIN	Acc:ZDB-GENE-060315-9]	slc39a3	KN149816.1	() ): :
ENSDARG00000079664	1.95	1.96	1.63	2.78	1.04	1.98	44.9277	-0.0141954	0.214169	0.889378	0.963559	ddo	565385		D-aspartate oxidase [Source:ZFIN	Acc:ZDB-GENE-080204-116]	ddo	17	() ): :
ENSDARG00000087601	10.37	10.88	10.5	8.54	7.42	15.22	181.572	0.0172539	0.179756	0.889328	0.963554	gpr153	101883998		G protein-coupled receptor 153 [Source:HGNC Symbol	Acc:HGNC:23618]	GPR153	8	() ): :
ENSDARG00000076650	0.91	0.98	1.25	0.93	1.13	1.21	17.4017	-0.0124168	0.224125	0.889197	0.963509	pde9ac	564389				15	() ): :
ENSDARG00000091090	0.3	3.42	0.25	1.13	0.79	1.74	100.004	0.00725281	0.239647	0.889129	0.963509	xirp2b	100535904		xin actin binding repeat containing 2 [Source:HGNC Symbol	Acc:HGNC:14303]	XIRP2	9	() ): :,GO:0003779(molecular_function) ): :actin binding,GO:0051015(molecular_function) ): :actin filament binding,GO:0030036(biological_process) ): :actin cytoskeleton organization,GO:0007015(biological_process) ): :actin filament organization,GO:0005925(cellular_component) ): :focal adhesion,GO:0001725(cellular_component) ): :stress fiber,GO:0030054(cellular_component) ): :cell junction
ENSDARG00000093137	0.16	2.73	2.49	2.41	1.33	2.18	9.42482	-0.00781083	0.237519	0.889242	0.963509						9	() ): :
ENSDARG00000102923	11.81	15.11	14.85	12.77	11.55	16.43	190.799	0.0171113	0.161128	0.889194	0.963509						20	() ): :
ENSDARG00000025478	5.89	5.28	8.15	7.29	6.43	5.71	132.81	-0.016115	0.178737	0.888814	0.963239	gipr	101885360				15	GO:0016519(molecular_function) ): :gastric inhibitory peptide receptor activity,GO:0016020(cellular_component) ): :membrane,GO:0004888(molecular_function) ): :transmembrane signaling receptor activity,GO:0005886(cellular_component) ): :plasma membrane,GO:0004930(molecular_function) ): :G protein-coupled receptor activity,GO:0007165(biological_process) ): :signal transduction,GO:0007186(biological…
ENSDARG00000004931	14.78	16.92	15.06	16.79	12.35	16.59	448.393	0.0163354	0.141444	0.888764	0.963233	slc8a3	560561		solute carrier family 8 member 3 [Source:ZFIN	Acc:ZDB-GENE-050810-1]	slc8a3	13	GO:0016020(cellular_component) ): :membrane,GO:0006811(biological_process) ): :monoatomic ion transport,GO:0055085(biological_process) ): :transmembrane transport,GO:0005886(cellular_component) ): :plasma membrane,GO:0046872(molecular_function) ): :metal ion binding,GO:0006814(biological_process) ): :sodium ion transport,GO:0035725(biological_process) ): :sodium ion transmembrane transport,GO:000…
ENSDARG00000017739	7.27	7.85	9.16	10	8.62	5.76	122.308	-0.0165755	0.188016	0.888684	0.963233	ak5l	548336		adenylate kinase 5, like [Source:ZFIN	Acc:ZDB-GENE-050410-2]	ak5l	5	() ): :
ENSDARG00000070504	9.07	8.46	7.49	7.72	6.34	10.51	308.782	0.0170897	0.157709	0.888753	0.963233	trpc5a	557456		transient receptor potential cation channel, subfamily C, member 5a [Source:ZFIN	Acc:ZDB-GENE-040812-1]	trpc5a	1	() ): :
ENSDARG00000090751	8.08	8.31	7.84	6.85	7.86	8.84	228.685	0.0167301	0.148356	0.888608	0.963208	zc3h3	561182				6	() ): :,GO:0046872(molecular_function) ): :metal ion binding,GO:0005634(cellular_component) ): :nucleus
ENSDARG00000044357	20.78	21.19	28.92	26.07	22.06	22.76	766.014	-0.0158229	0.138412	0.888513	0.963154	tbc1d23	798995		TBC1 domain family, member 23 [Source:NCBI gene (formerly Entrezgene)	Acc:798995]	tbc1d23	6	() ): :
ENSDARG00000104924	0.61	0.79	0.86	0.57	0.59	1	16.7112	0.0125302	0.22579	0.888488	0.963154	LOC100536537	100536537				21	() ): :
ENSDARG00000010137	25.75	25.82	30.7	30.93	23.86	25.02	784.991	0.0149773	0.134101	0.888258	0.963037	ldb1a	30579		LIM domain binding 1a [Source:ZFIN	Acc:ZDB-GENE-990415-138]	ldb1a	13	() ): :
ENSDARG00000019371	7.56	8.45	8.94	6.13	8.66	9.42	283.189	0.0171725	0.156572	0.888316	0.963037	flt1	544667		fms related receptor tyrosine kinase 1 [Source:ZFIN	Acc:ZDB-GENE-050407-1]	flt1	24	() ): :
ENSDARG00000097736	3.23	2.98	4.02	4	3.2	3.46	18.9889	-0.0128332	0.222741	0.888253	0.963037						11	() ): :
ENSDARG00000105185	2.17	1.84	2.77	1.43	1.84	3.33	46.3041	0.0153116	0.211102	0.888316	0.963037	snx7	431776		sorting nexin 7 [Source:ZFIN	Acc:ZDB-GENE-040704-77]	snx7	24	() ): :
ENSDARG00000008880	0.15	0.97	0.15	0.19	0.29	0.74	18.4184	0.00941924	0.235533	0.887979	0.962967	usp28	567050		ubiquitin specific peptidase 28 [Source:HGNC Symbol	Acc:HGNC:12625]	USP28	21	() ): :
ENSDARG00000010785	2.07	3.03	2.39	2.74	2.21	2.26	138.515	0.0174592	0.177929	0.887954	0.962967	thbs1b	561901		thrombospondin 1 [Source:HGNC Symbol	Acc:HGNC:11785]	THBS1	20	() ): :,GO:0005576(cellular_component) ): :extracellular region,GO:0005509(molecular_function) ): :calcium ion binding,GO:0007155(biological_process) ): :cell adhesion,GO:0062023(cellular_component) ): :collagen-containing extracellular matrix,GO:0016525(biological_process) ): :negative regulation of angiogenesis,GO:0008201(molecular_function) ): :heparin binding,GO:0048856(biological_process) ):…
ENSDARG00000013976	28.89	22.24	25.3	27.4	27.6	18.18	911.033	0.0174159	0.161	0.887796	0.962967	anxa13	81880		annexin A13 [Source:ZFIN	Acc:ZDB-GENE-010406-1]	anxa13	24	() ): :
ENSDARG00000028614	9.3	9.95	11.03	10.67	9.74	10.14	125.891	-0.017062	0.166519	0.887748	0.962967	mospd1	406678		motile sperm domain containing 1 [Source:ZFIN	Acc:ZDB-GENE-040426-2691]	mospd1	14	() ): :
ENSDARG00000033871	4.92	5.89	6.9	5.63	6.34	5.9	95.5621	-0.0169587	0.181095	0.887999	0.962967	derl3	393877		derlin 3 [Source:ZFIN	Acc:ZDB-GENE-040426-1324]	derl3	8	() ): :
ENSDARG00000037845	0.61	0.68	0.63	0.45	0.46	0.92	19.1132	0.0129516	0.224393	0.887941	0.962967	col9a3	567110		collagen, type IX, alpha 3 [Source:ZFIN	Acc:ZDB-GENE-030131-9799]	col9a3	23	() ): :
ENSDARG00000045518	1.44	1.51	1.51	1.48	1.89	1.21	19.3156	-0.0127142	0.223407	0.888057	0.962967	tmem110l	393166		transmembrane protein 110, like [Source:ZFIN	Acc:ZDB-GENE-040426-912]	tmem110l	4	() ): :
ENSDARG00000075891	1.93	1.29	1.28	1	1.87	1.73	70.3863	-0.0157213	0.203185	0.887925	0.962967	sall1b	100149526		spalt like transcription factor 1 [Source:HGNC Symbol	Acc:HGNC:10524]	SALL1	25	GO:0005634(cellular_component) ): :nucleus,GO:0046872(molecular_function) ): :metal ion binding,GO:0000978(molecular_function) ): :RNA polymerase II cis-regulatory region sequence-specific DNA binding,GO:0006357(biological_process) ): :regulation of transcription by RNA polymerase II,GO:0000981(molecular_function) ): :DNA-binding transcription factor activity, RNA polymerase II-specific
ENSDARG00000077385	19.71	17.15	15.45	17.57	14.03	19.12	85.4547	0.0173981	0.184781	0.888073	0.962967	rgs19	100170801		regulator of G protein signaling 19 [Source:ZFIN	Acc:ZDB-GENE-080723-72]	rgs19	23	() ): :
ENSDARG00000079183	0.53	0.38	0.24	0.44	0.08	0.82	4.32218	-0.00662321	0.239867	0.887827	0.962967	sod3b	794006		superoxide dismutase 3 [Source:HGNC Symbol	Acc:HGNC:11181]	SOD3	1	GO:0008201(molecular_function) ): :heparin binding,GO:0046872(molecular_function) ): :metal ion binding,GO:0016491(molecular_function) ): :oxidoreductase activity,GO:0005507(molecular_function) ): :copper ion binding,GO:0006801(biological_process) ): :superoxide metabolic process,GO:0019430(biological_process) ): :removal of superoxide radicals,GO:0004784(molecular_function) ): :superoxide dismut…
ENSDARG00000025436	2.48	1.56	3.5	3.63	1.5	2.7	35.8728	-0.0136265	0.219511	0.887389	0.962899	msrb1a	352916		methionine sulfoxide reductase B1a [Source:ZFIN	Acc:ZDB-GENE-030411-3]	msrb1a	3	() ): :
ENSDARG00000037069	13.29	12.03	17.41	16.54	9.99	17.03	214.46	-0.0170648	0.173262	0.887551	0.962899	zdhhc14	569667		zinc finger DHHC-type palmitoyltransferase 14 [Source:ZFIN	Acc:ZDB-GENE-040724-21]	zdhhc14	20	() ): :
ENSDARG00000057209	1.73	1.51	2.18	1.76	1.27	2.21	51.3557	0.016403	0.202545	0.887497	0.962899	plppr5a	100006660		phospholipid phosphatase related 5a [Source:ZFIN	Acc:ZDB-GENE-070705-281]	plppr5a	2	() ): :
ENSDARG00000058208	4.71	4.59	4.35	4.34	4.58	5.02	52.1553	-0.0163619	0.196607	0.887375	0.962899	slc25a26	560478		solute carrier family 25 member 26 [Source:NCBI gene (formerly Entrezgene)	Acc:560478]	slc25a26	11	GO:0016020(cellular_component) ): :membrane,() ): :
ENSDARG00000059705	8.16	7.25	5.73	7.02	5.6	7.65	38.8852	0.0157525	0.208522	0.88748	0.962899						23	() ): :
ENSDARG00000070686	33.16	45.6	50.4	49.7	40.33	33.95	600.963	0.0174832	0.162715	0.887473	0.962899	cdipt	404620		CDP-diacylglycerol--inositol 3-phosphatidyltransferase (phosphatidylinositol synthase) [Source:ZFIN	Acc:ZDB-GENE-040426-2536]	cdipt	3	() ): :
ENSDARG00000074356	3.49	3.2	3.46	3.04	2.98	3.81	90.361	0.0175448	0.177777	0.887419	0.962899	fxn	556389		frataxin [Source:ZFIN	Acc:ZDB-GENE-070209-286]	fxn	8	() ): :
ENSDARG00000079469	2.13	2.04	2.81	2	2.38	2.27	55.4977	0.0168494	0.197274	0.887532	0.962899				transient receptor potential cation channel subfamily C member 7 [Source:HGNC Symbol	Acc:HGNC:20754]	TRPC7	14	() ): :
ENSDARG00000094010	3.7	3.23	3.4	3.86	2.92	3.2	117.26	0.0175817	0.174076	0.887355	0.962899	swt1	559432		SWT1 RNA endoribonuclease homolog [Source:HGNC Symbol	Acc:HGNC:16785]	SWT1	20	() ): :
ENSDARG00000098951	1.34	0.59	0.85	0.95	0.85	0.73	10.778	0.010657	0.232195	0.887564	0.962899						7	() ): :
ENSDARG00000100403	0.89	2.04	1.21	1.28	1.25	1.94	9.08373	-0.0095933	0.233966	0.887566	0.962899						13	() ): :
ENSDARG00000115704	187.16	135.03	77.78	135.23	66.2	229.76	36.2488	-0.0127659	0.223226	0.887272	0.962899				Small nucleolar RNA U3 [Source:RFAM	Acc:RF00012]	U3	1	GO:0006396(biological_process) ): :RNA processing,GO:0005730(cellular_component) ): :nucleolus
ENSDARG00000022968	17.26	19.04	13.38	16.83	14.24	17.33	356.346	0.0173212	0.155309	0.886959	0.962821	fxr1	327220		FMR1 autosomal homolog 1 [Source:ZFIN	Acc:ZDB-GENE-030131-5431]	fxr1	22	() ): :
ENSDARG00000031783	40.98	39.73	43.98	42.39	37.79	44.86	676.276	-0.0140457	0.112141	0.886919	0.962821	adcy8	100148976		adenylate cyclase 8 (brain) [Source:ZFIN	Acc:ZDB-GENE-070912-197]	adcy8	2	() ): :
ENSDARG00000061351	0.37	0.39	0.5	0.15	0.63	0.56	6.63135	-0.0083914	0.236914	0.886866	0.962817	tfpi2	560339		tissue factor pathway inhibitor 2 [Source:ZFIN	Acc:ZDB-GENE-060503-38]	tfpi2	19	() ): :
ENSDARG00000002355	1.1	1.78	1.46	1.92	1.18	1.46	18.9385	-0.0125658	0.224457	0.886813	0.962808	shpk	100001676		sedoheptulokinase [Source:HGNC Symbol	Acc:HGNC:1492]	SHPK	5	() ): :,GO:0016740(molecular_function) ): :transferase activity,GO:0005829(cellular_component) ): :cytosol,GO:0016301(molecular_function) ): :kinase activity,GO:0016310(biological_process) ): :phosphorylation,GO:0005975(biological_process) ): :carbohydrate metabolic process,GO:0071222(biological_process) ): :cellular response to lipopolysaccharide,GO:0050277(molecular_function) ): :sedoheptulokin…
ENSDARG00000062370	18.22	14.7	18.13	20.95	14.85	15.59	305.022	-0.0169713	0.158419	0.886798	0.962808	bcl2l13	559355		BCL2 like 13 [Source:ZFIN	Acc:ZDB-GENE-050419-215]	bcl2l13	18	() ): :
ENSDARG00000093449	0.44	2.25	0.9	0.79	1.07	1.52	11.7641	0.00980401	0.234552	0.886729	0.962808						21	() ): :
ENSDARG00000037266	2.86	1.52	1.87	2.71	1.9	1.88	21.534	-0.0128801	0.223266	0.886629	0.962753	myoz2b	393828		myozenin 2b [Source:ZFIN	Acc:ZDB-GENE-040426-1853]	myoz2b	1	() ): :
ENSDARG00000044685	0.18	0.26	0.17	0.31	0.03	0.37	6.59135	-0.00758863	0.238365	0.88658	0.962749	nr0b2a	403010		nuclear receptor subfamily 0, group B, member 2a [Source:ZFIN	Acc:ZDB-GENE-080403-1]	nr0b2a	16	() ): :
ENSDARG00000000175	1.31	1.64	1.34	0.95	1.19	1.95	23.7295	0.0139741	0.220711	0.88627	0.96261	hoxb2a	30338		homeobox B2a [Source:ZFIN	Acc:ZDB-GENE-990415-103]	hoxb2a	3	() ): :
ENSDARG00000052000	1.36	0.57	0.38	0.67	0.62	0.86	11.689	0.0103812	0.233298	0.886334	0.96261	cav2	415240		caveolin 2 [Source:ZFIN	Acc:ZDB-GENE-040625-164]	cav2	25	() ): :
ENSDARG00000053326	61.11	52.93	55.28	60.17	48.18	61.96	1296.57	-0.0150122	0.11796	0.88622	0.96261	gna11b	493613		guanine nucleotide binding protein (G protein), alpha 11b (Gq class) [Source:ZFIN	Acc:ZDB-GENE-041121-9]	gna11b	2	() ): :
ENSDARG00000070658	9.85	8.59	10.32	8.35	9.31	11.4	210.103	-0.016839	0.15197	0.886374	0.96261	zbtb12.2	559081		zinc finger and BTB domain containing 12, tandem duplicate 2 [Source:ZFIN	Acc:ZDB-GENE-060503-27]	zbtb12.2	19	() ): :
ENSDARG00000079636	13.13	9.88	13.25	13.23	10.55	11.23	193.156	0.0142496	0.162268	0.886303	0.96261	fam177a1	100126028		family with sequence similarity 177 member A1 [Source:ZFIN	Acc:ZDB-GENE-070928-21]	fam177a1	17	() ): :
ENSDARG00000088307	22.03	22.52	21.62	21.27	20.31	24.92	919.551	-0.0136883	0.110344	0.886408	0.96261	mrtfba	793956		myocardin related transcription factor B [Source:HGNC Symbol	Acc:HGNC:29819]	MRTFB	12	() ): :
ENSDARG00000094874	2.32	4.23	4.06	2.06	3.72	5.44	20.4477	-0.0123127	0.225808	0.886314	0.96261						8	() ): :
ENSDARG00000099245	2.07	1.78	1.78	1.43	1.84	2.12	60.0211	0.0171602	0.195409	0.886212	0.96261	LOC100330167	100330167				KN150703.1	() ): :
ENSDARG00000100889	4.09	4.23	3.09	3.91	3.49	4.25	97.2317	-0.0169439	0.182929	0.886302	0.96261	galnt18a	100170813		UDP-N-acetyl-alpha-D-galactosamine:polypeptide N-acetylgalactosaminyltransferase 18a [Source:ZFIN	Acc:ZDB-GENE-080723-30]	galnt18a	25	() ): :
ENSDARG00000102733	0.41	0.44	0.19	1.06	0.07	0	5.11188	-0.00571691	0.241283	0.88587	0.962461	LOC110438456	110438456				KN150334.1	() ): :
ENSDARG00000011410	3.76	5.3	4.71	3.99	5.07	3.97	55.3951	0.0168058	0.200879	0.885796	0.962459	aadat	557979		aminoadipate aminotransferase [Source:HGNC Symbol	Acc:HGNC:17929]	AADAT	7	() ): :
ENSDARG00000013009	7.82	7.58	8.86	9.1	6.69	7.69	169.737	0.0176649	0.162436	0.885824	0.962459	ubiad1	558410		UbiA prenyltransferase domain containing 1 [Source:ZFIN	Acc:ZDB-GENE-030131-3205]	ubiad1	8	() ): :
ENSDARG00000015404	0.41	0.88	1.83	1.72	0.38	0.67	7.74509	0.0083846	0.237696	0.885803	0.962459	arl3l2	393692		ADP ribosylation factor like GTPase 3, like 2 [Source:ZFIN	Acc:ZDB-GENE-040426-1678]	arl3l2	14	() ): :
ENSDARG00000038030	43.03	37.91	44.61	50.25	44.5	31.28	140.205	-0.0173094	0.181218	0.885682	0.962459	rbx1	449846		ring-box 1, E3 ubiquitin protein ligase [Source:ZFIN	Acc:ZDB-GENE-041008-106]	rbx1	3	() ): :
ENSDARG00000059424	7.35	6.81	7.16	7.16	7.23	7.23	75.6627	-0.017268	0.183873	0.885598	0.962459	rnf215	101882431				5	() ): :
ENSDARG00000070391	3.02	3.07	4.18	2.64	3.18	4.02	43.925	0.0164411	0.205013	0.885613	0.962459	tspan4b	556934		tetraspanin 4b [Source:ZFIN	Acc:ZDB-GENE-070410-127]	tspan4b	3	() ): :
ENSDARG00000076611	21.26	20.73	25.21	22.14	20.33	25.17	338.544	-0.0157387	0.133719	0.885709	0.962459	fbxo21	567738		F-box protein 21 [Source:HGNC Symbol	Acc:HGNC:13592]	FBXO21	5	() ): :
ENSDARG00000103266	3.52	3.76	3.98	4.28	3.07	4.16	104.826	-0.00319597	0.176514	0.885533	0.962459	ogal	571547				11	() ): :
ENSDARG00000012672	31.97	31.56	30.53	32.28	29.3	29.68	382.536	0.0162978	0.133641	0.885432	0.96242	gtf2e2	334854		general transcription factor IIE, polypeptide 2, beta [Source:ZFIN	Acc:ZDB-GENE-030131-6794]	gtf2e2	1	() ): :
ENSDARG00000102898	16.54	18.04	16.99	12.47	16.19	21.75	462.197	0.0174728	0.153099	0.885222	0.96224	mtf1	195821		metal-regulatory transcription factor 1 [Source:ZFIN	Acc:ZDB-GENE-020424-1]	mtf1	16	() ): :
ENSDARG00000102722	0.06	0.35	0.15	0.12	0.34	0	5.00739	0.00647235	0.240762	0.885068	0.962121	itih3b.1	613141		inter-alpha-trypsin inhibitor heavy chain 3b, tandem duplicate 1 [Source:ZFIN	Acc:ZDB-GENE-040426-2716]	itih3b.1	11	() ): :
ENSDARG00000035023	39.93	36.45	38.01	33.35	33.02	49.79	509.255	-0.0164326	0.140815	0.884915	0.962081	khdc4	321686		KH domain containing 4, pre-mRNA splicing factor [Source:ZFIN	Acc:ZDB-GENE-030131-405]	khdc4	16	() ): :
ENSDARG00000040200	6.87	0	6.55	0	9.05	7.63	26.5192	-0.00330296	0.24347	0.884878	0.962081	LOC100005907	100005907				3	() ): :
ENSDARG00000076380	5.36	6.01	6.4	5.79	5.95	6.5	39.8097	-0.0160463	0.204666	0.884986	0.962081						20	() ): :
ENSDARG00000089889	21.28	19.18	23.35	23.51	19.06	21.72	234.171	-0.0169006	0.148344	0.884848	0.962081	rpz6	100000883		rapunzel 6 [Source:ZFIN	Acc:ZDB-GENE-170530-5]	rpz6	16	() ): :
ENSDARG00000101903	22.22	20.31	20.58	17.93	18.64	25.38	1008.45	0.0157228	0.124966	0.884987	0.962081	zfyve9a	100005449		zinc finger FYVE-type containing 9 [Source:HGNC Symbol	Acc:HGNC:6775]	ZFYVE9	2	GO:0046872(molecular_function) ): :metal ion binding,GO:0005768(cellular_component) ): :endosome,GO:0001889(biological_process) ): :liver development,GO:0048699(biological_process) ): :generation of neurons,GO:0031901(cellular_component) ): :early endosome membrane,GO:0016197(biological_process) ): :endosomal transport,GO:0072574(biological_process) ): :hepatocyte proliferation
ENSDARG00000102963	11.06	12.93	10.59	10.75	8.62	14.42	143.792	0.0179499	0.175056	0.88494	0.962081	sirt6	415161		sirtuin 6 [Source:ZFIN	Acc:ZDB-GENE-031007-2]	sirt6	2	() ): :
ENSDARG00000096932	0.45	0.6	0.68	0.6	0.4	0.63	19.5543	0.0136417	0.223092	0.884633	0.961987	nell3	101886867				24	() ): :
[truncated: 30,781 more rows]
