# Supplementary material for: Long-Term Benefits of TUDCA Supplement in ARSACS Zebrafish Model
Source: Research Square preprint supplement (doi:10.21203/rs.3.rs-5957432/v1), 2025-04-16
Supplement: Supplementary file 3 [file ee9a07eddaff604692b76182.xlsx]

## Sheet: Foglio1
Table 1: differentially expressed gene transcripts (DEGs)
Row names	log2 Fold Change	Fold change	padj	"- LOG10 padj "
ENSDARG00000100614	13.2448	3.1601	6.30442e-20	19.2004
ENSDARG00000092938	6.89177	2.57182	9.79936e-05	4.0088
ENSDARG00000071644	6.73581	0.619431	8.08122e-25	24.0925
ENSDARG00000038248	6.32577	2.76728	0.00359337	2.4445
ENSDARG00000095144	6.11358	0.925218	1.24712e-08	7.90409
ENSDARG00000092527	5.85277	2.59548	0.0034463	2.46265
ENSDARG00000117742	5.81189	1.40776	0.000211068	3.67558
ENSDARG00000099829	5.57238	0.423105	6.63479e-37	36.1782
ENSDARG00000103091	5.54818	2.63492	0.00785372	2.10492
ENSDARG00000076981	5.52961	1.19567	6.79152e-05	4.16803
ENSDARG00000039687	5.4969	0.807867	3.0668e-09	8.51331
ENSDARG00000089179	5.4103	0.380328	2.09876e-43	42.678
ENSDARG00000071553	5.38315	2.60986	0.00940691	2.02655
ENSDARG00000112719	5.35484	2.57649	0.00851182	2.06998
ENSDARG00000114577	5.34366	0.329415	2.03669e-56	55.6911
ENSDARG00000094694	5.27444	2.5971	0.0106586	1.9723
ENSDARG00000090600	4.75918	0.729777	1.79147e-09	8.74679
ENSDARG00000113896	4.75362	0.31401	2.14911e-49	48.6677
ENSDARG00000094658	4.64533	1.11535	0.00115635	2.93691
ENSDARG00000114317	4.25858	0.389112	8.02859e-26	25.0954
ENSDARG00000098585	4.2219	1.15205	0.00408745	2.38855
ENSDARG00000074191	4.11394	0.604517	9.65006e-10	9.01547
ENSDARG00000071643	4.10425	1.30662	0.00271904	2.56558
ENSDARG00000095643	4.0946	1.21566	0.00359337	2.4445
ENSDARG00000068127	3.70492	1.17596	0.0042501	2.3716
ENSDARG00000094433	3.69755	1.02719	0.0034463	2.46265
ENSDARG00000075248	3.61388	0.901145	0.000780697	3.10752
ENSDARG00000104412	3.57086	0.448393	8.9225e-14	13.0495
ENSDARG00000077068	3.50975	0.461921	8.57875e-13	12.0666
ENSDARG00000113065	3.42781	0.949849	0.00177341	2.75119
ENSDARG00000079992	3.31939	1.34956	0.0254843	1.59373
ENSDARG00000092920	3.31609	1.21822	0.0166665	1.77815
ENSDARG00000101598	3.28314	0.251921	1.32659e-36	35.8773
ENSDARG00000086130	3.22139	0.630649	6.83749e-06	5.1651
ENSDARG00000089079	3.20624	0.693933	2.62507e-05	4.58086
ENSDARG00000097662	3.17072	1.13863	0.0209021	1.67981
ENSDARG00000029848	3.16397	1.30442	0.0263802	1.57872
ENSDARG00000097060	3.09638	0.713459	7.99825e-05	4.09701
ENSDARG00000103597	3.04516	0.539775	5.77511e-07	6.23844
ENSDARG00000101930	2.94179	1.13699	0.026855	1.57097
ENSDARG00000115894	2.88397	0.694191	0.000265891	3.5753
ENSDARG00000104899	2.8298	1.23889	0.0195103	1.70974
ENSDARG00000101206	2.81419	0.5123	5.99831e-07	6.22197
ENSDARG00000086569	2.61011	0.471619	5.48335e-07	6.26095
ENSDARG00000069833	2.60605	1.04545	0.017592	1.75469
ENSDARG00000097536	2.58233	0.510691	5.48123e-06	5.26112
ENSDARG00000111465	2.56224	0.580221	7.68739e-05	4.11422
ENSDARG00000023302	2.5358	0.556787	4.40492e-05	4.35606
ENSDARG00000001818	2.5335	0.494126	3.49596e-06	5.45643
ENSDARG00000101312	2.49402	0.427668	1.21941e-07	6.91385
ENSDARG00000093165	2.47238	0.388602	8.71608e-09	8.05968
ENSDARG00000103229	2.46689	0.304514	4.57593e-14	13.3395
ENSDARG00000105511	2.45981	0.481555	4.86238e-06	5.31315
ENSDARG00000101212	2.3399	0.291764	7.15941e-14	13.1451
ENSDARG00000104083	2.33002	0.942298	0.0263162	1.57978
ENSDARG00000092569	2.32795	0.653365	0.0016369	2.78598
ENSDARG00000086925	2.32262	0.642269	0.00161848	2.79089
ENSDARG00000055100	2.31374	0.329452	9.14506e-11	10.0388
ENSDARG00000100257	2.27	0.560971	0.000363287	3.43975
ENSDARG00000014057	2.23679	0.847396	0.0191946	1.71682
ENSDARG00000098279	2.1679	0.734775	0.00786923	2.10407
ENSDARG00000100061	2.12004	0.26537	8.9225e-14	13.0495
ENSDARG00000014208	2.10381	0.752202	0.00781863	2.10687
ENSDARG00000090612	2.09193	0.986941	0.0323988	1.48947
ENSDARG00000104064	2.06396	0.423026	1.06969e-05	4.97074
ENSDARG00000115299	2.03643	0.367952	5.77511e-07	6.23844
ENSDARG00000068161	1.95104	0.57528	0.00262035	2.58164
ENSDARG00000087645	1.90616	0.834107	0.0247049	1.60722
ENSDARG00000087306	1.86309	0.183377	3.58718e-22	21.4452
ENSDARG00000026820	1.80202	0.572468	0.0042501	2.3716
ENSDARG00000071025	1.79136	0.309799	1.86707e-07	6.72884
ENSDARG00000104875	1.76725	0.674219	0.0177825	1.75001
ENSDARG00000110637	1.76529	0.37098	2.23417e-05	4.65088
ENSDARG00000105561	1.74963	0.453184	0.00064096	3.19317
ENSDARG00000094423	1.70973	0.713889	0.0236364	1.62642
ENSDARG00000105651	1.69293	0.439549	0.000544658	3.26388
ENSDARG00000012422	1.68258	0.633265	0.0147995	1.82975
ENSDARG00000098653	1.65991	0.849818	0.0410311	1.38689
ENSDARG00000113022	1.65949	0.791231	0.0375985	1.42483
ENSDARG00000035809	1.59869	0.389522	0.000235329	3.62832
ENSDARG00000068374	1.58614	0.302505	2.35616e-06	5.62779
ENSDARG00000104476	1.56322	0.55848	0.0113477	1.94509
ENSDARG00000094683	1.53751	0.438992	0.00178694	2.74789
ENSDARG00000116211	1.52908	0.688406	0.0311208	1.50695
ENSDARG00000113431	1.52357	0.529068	0.00851182	2.06998
ENSDARG00000074844	1.51514	0.28104	1.29008e-06	5.88938
ENSDARG00000095719	1.50163	0.525018	0.0101576	1.99321
ENSDARG00000075397	1.48686	0.418927	0.00152223	2.81752
ENSDARG00000113243	1.45396	0.252778	2.08323e-07	6.68126
ENSDARG00000102873	1.44509	0.334462	0.000112024	3.95069
ENSDARG00000105176	1.42002	0.511552	0.012736	1.89497
ENSDARG00000074852	1.41757	0.363464	0.000564893	3.24803
ENSDARG00000089852	1.4152	0.620894	0.0265114	1.57657
ENSDARG00000033160	1.40472	0.301036	2.87067e-05	4.54202
ENSDARG00000103143	1.38789	0.493095	0.0106586	1.9723
ENSDARG00000027088	1.37707	0.234911	1.26467e-07	6.89802
ENSDARG00000116915	1.35361	0.523903	0.0157869	1.8017
ENSDARG00000088493	1.29239	0.223961	1.91162e-07	6.7186
ENSDARG00000092445	1.28352	0.654192	0.0423749	1.37289
ENSDARG00000080987	1.28001	0.395062	0.00359337	2.4445
ENSDARG00000098777	1.26123	0.340766	0.00107291	2.96944
ENSDARG00000105046	1.26029	0.44202	0.0101658	1.99286
ENSDARG00000103381	1.2587	0.561726	0.0313585	1.50365
ENSDARG00000058011	1.24998	0.526862	0.0244149	1.61235
ENSDARG00000079762	1.24778	0.509085	0.0209021	1.67981
ENSDARG00000115017	1.23745	0.654559	0.0475519	1.32283
ENSDARG00000113192	1.20419	0.542945	0.0334857	1.47514
ENSDARG00000010266	1.19704	0.374356	0.00418431	2.37838
ENSDARG00000038557	1.17472	0.34579	0.00270383	2.56802
ENSDARG00000103420	1.17034	0.278183	0.000194413	3.71128
ENSDARG00000100996	1.11457	0.541616	0.0409893	1.38733
ENSDARG00000026400	1.11392	0.527883	0.0409887	1.38734
ENSDARG00000076420	1.11318	0.358958	0.00588226	2.23046
ENSDARG00000058094	1.1113	0.338234	0.0034136	2.46679
ENSDARG00000012499	1.10633	0.22156	6.38729e-06	5.19468
ENSDARG00000028878	1.10613	0.476431	0.02841	1.54653
ENSDARG00000117545	1.09462	0.455005	0.0239828	1.6201
ENSDARG00000100227	1.06867	0.263772	0.000327883	3.48428
ENSDARG00000095512	1.05574	0.429241	0.0223032	1.65163
ENSDARG00000004539	1.04453	0.453739	0.0305187	1.51543
ENSDARG00000024195	1.04162	0.174776	8.22279e-08	7.08498
ENSDARG00000070845	1.02131	0.310029	0.00357321	2.44694
ENSDARG00000067672	1.01434	0.513972	0.0481408	1.31749
ENSDARG00000098899	1.01349	0.397992	0.0195531	1.70878
ENSDARG00000102798	1.00159	0.400323	0.0215295	1.66697
ENSDARG00000052190	0.998253	0.327943	0.00727406	2.13822
ENSDARG00000062893	0.983535	0.353577	0.012736	1.89497
ENSDARG00000114166	0.965029	0.458856	0.0398931	1.3991
ENSDARG00000116814	0.961606	0.224018	0.000145007	3.83861
ENSDARG00000102403	0.958758	0.15421	1.80365e-08	7.74385
ENSDARG00000092448	0.950891	0.379222	0.0218396	1.66075
ENSDARG00000051962	0.947476	0.270497	0.00212727	2.67218
ENSDARG00000071670	0.922627	0.210016	0.000104669	3.98018
ENSDARG00000101667	0.90852	0.255057	0.00173024	2.76189
ENSDARG00000061414	0.90315	0.211217	0.000154031	3.81239
ENSDARG00000100439	0.890687	0.406115	0.0357463	1.44677
ENSDARG00000038476	0.867058	0.366876	0.0271783	1.56578
ENSDARG00000022650	0.85759	0.395862	0.0382886	1.41693
ENSDARG00000021664	0.84942	0.171207	9.88233e-06	5.00514
ENSDARG00000095059	0.847814	0.380266	0.0348118	1.45827
ENSDARG00000102254	0.846276	0.330917	0.0209022	1.67981
ENSDARG00000056885	0.845672	0.354835	0.0267258	1.57307
ENSDARG00000105190	0.843552	0.190697	9.4231e-05	4.02581
ENSDARG00000053097	0.830917	0.192628	0.000138883	3.85735
ENSDARG00000014652	0.829336	0.206966	0.000425377	3.37123
ENSDARG00000010519	0.816547	0.216207	0.000780697	3.10752
ENSDARG00000076529	0.807572	0.180923	8.28059e-05	4.08194
ENSDARG00000041691	0.805319	0.213941	0.000983291	3.00732
ENSDARG00000034048	0.799704	0.191104	0.000235329	3.62832
ENSDARG00000078301	0.797222	0.189572	0.000225108	3.64761
ENSDARG00000057652	0.796608	0.17018	3.5446e-05	4.45043
ENSDARG00000075334	0.796067	0.308323	0.0201035	1.69673
ENSDARG00000033029	0.784942	0.311407	0.0221476	1.65467
ENSDARG00000075597	0.77757	0.259343	0.00851182	2.06998
ENSDARG00000018146	0.771866	0.19473	0.000535677	3.2711
ENSDARG00000099099	0.768623	0.282766	0.0161179	1.79269
ENSDARG00000088549	0.764581	0.234337	0.00428551	2.368
ENSDARG00000030905	0.754092	0.181247	0.000265891	3.5753
ENSDARG00000043856	0.75358	0.160906	3.62616e-05	4.44055
ENSDARG00000090164	0.745909	0.169313	0.000104669	3.98018
ENSDARG00000113690	0.743585	0.333184	0.0381697	1.41828
ENSDARG00000069029	0.743328	0.348493	0.0430792	1.36573
ENSDARG00000013125	0.735157	0.314954	0.0323988	1.48947
ENSDARG00000079625	0.73294	0.197528	0.00126046	2.89947
ENSDARG00000042835	0.731404	0.327828	0.0394884	1.40353
ENSDARG00000090429	0.721884	0.349916	0.0481408	1.31749
ENSDARG00000037159	0.720025	0.278994	0.021654	1.66446
ENSDARG00000069139	0.715914	0.254686	0.0134567	1.87106
ENSDARG00000091574	0.71405	0.294353	0.0276179	1.55881
ENSDARG00000103684	0.704933	0.237907	0.0101477	1.99363
ENSDARG00000020191	0.697781	0.242091	0.0117882	1.92855
ENSDARG00000002365	0.693623	0.289999	0.0311025	1.50721
ENSDARG00000002396	0.691241	0.288624	0.0298914	1.52445
ENSDARG00000061409	0.689666	0.174321	0.000573597	3.24139
ENSDARG00000089296	0.68346	0.232619	0.0106586	1.9723
ENSDARG00000104269	0.682086	0.316205	0.0444758	1.35188
ENSDARG00000069755	0.680611	0.120435	4.94329e-07	6.30598
ENSDARG00000101178	0.676244	0.242297	0.0148929	1.82702
ENSDARG00000114529	0.667765	0.219265	0.00851182	2.06998
ENSDARG00000055722	0.667501	0.248031	0.0181889	1.74019
ENSDARG00000100075	0.667205	0.245268	0.0176407	1.75348
ENSDARG00000021097	0.659062	0.227776	0.0121674	1.9148
ENSDARG00000006978	0.657696	0.264597	0.0269414	1.56958
ENSDARG00000010144	0.655827	0.169926	0.000833707	3.07899
ENSDARG00000062465	0.652023	0.197059	0.0042849	2.36806
ENSDARG00000061051	0.648122	0.194142	0.00394805	2.40362
ENSDARG00000061948	0.645271	0.291677	0.0424563	1.37206
ENSDARG00000043821	0.645129	0.10935	1.41749e-07	6.84848
ENSDARG00000010010	0.644518	0.124456	3.49596e-06	5.45643
ENSDARG00000093024	0.641898	0.304045	0.0491557	1.30843
ENSDARG00000042322	0.628003	0.137586	6.75336e-05	4.17048
ENSDARG00000031222	0.620897	0.200845	0.00795059	2.0996
ENSDARG00000025797	0.620863	0.222239	0.015575	1.80757
ENSDARG00000006837	0.619429	0.195973	0.00668237	2.17507
ENSDARG00000074676	0.613617	0.234278	0.021796	1.66162
ENSDARG00000010770	0.61134	0.254575	0.0330538	1.48078
ENSDARG00000078155	0.606259	0.267407	0.0415038	1.38191
ENSDARG00000097281	0.593268	0.261073	0.0413386	1.38364
ENSDARG00000019498	0.582657	0.253807	0.0409923	1.3873
ENSDARG00000008097	0.580646	0.17444	0.00451718	2.34513
ENSDARG00000023028	0.571524	0.221649	0.0251411	1.59962
ENSDARG00000041140	0.551014	0.241996	0.0429568	1.36697
ENSDARG00000040779	0.54401	0.202534	0.021654	1.66446
ENSDARG00000073704	0.543283	0.184873	0.0126905	1.89652
ENSDARG00000045768	0.539151	0.15598	0.00339313	2.4694
ENSDARG00000073857	0.535334	0.16621	0.00642854	2.19189
ENSDARG00000100708	0.526805	0.179411	0.0130543	1.88425
ENSDARG00000103071	0.519953	0.137631	0.00134017	2.87284
ENSDARG00000078966	0.519128	0.130892	0.000712653	3.14712
ENSDARG00000078095	0.509536	0.127002	0.0006056	3.21781
ENSDARG00000010936	0.503781	0.205691	0.035224	1.45316
ENSDARG00000035821	0.500823	0.143021	0.00311742	2.50621
ENSDARG00000075376	0.494529	0.117056	0.00029642	3.52809
STRI	-0.492119	0.205691	0.0417206	1.37965
ENSDARG00000079440	-0.493468	0.174629	0.0183701	1.73589
ENSDARG00000074023	-0.501277	0.211601	0.0423749	1.37289
ENSDARG00000099624	-0.502662	0.170883	0.0144255	1.84087
ENSDARG00000034210	-0.51193	0.142999	0.00263444	2.57931
ENSDARG00000010956	-0.514449	0.184756	0.0194404	1.71129
ENSDARG00000100869	-0.522636	0.172969	0.0114945	1.93951
ENSDARG00000095192	-0.528681	0.162472	0.00637243	2.19569
ENSDARG00000038121	-0.531361	0.19648	0.0218571	1.66041
ENSDARG00000012426	-0.532349	0.230405	0.0444833	1.3518
ENSDARG00000021147	-0.533434	0.231735	0.0444833	1.3518
ENSDARG00000069808	-0.53358	0.227017	0.0414868	1.38209
ENSDARG00000030537	-0.533666	0.12379	0.000213542	3.67052
ENSDARG00000093549	-0.539604	0.241799	0.0498948	1.30194
ENSDARG00000077788	-0.542869	0.221838	0.0345644	1.46137
ENSDARG00000099186	-0.545381	0.21006	0.0263802	1.57872
ENSDARG00000077523	-0.554854	0.164276	0.0042849	2.36806
ENSDARG00000079369	-0.560348	0.223742	0.0308319	1.511
ENSDARG00000099389	-0.562892	0.208158	0.0213158	1.6713
ENSDARG00000069074	-0.56946	0.248112	0.0433197	1.36331
ENSDARG00000043932	-0.573353	0.195483	0.0131208	1.88204
ENSDARG00000006900	-0.574329	0.258213	0.0481408	1.31749
ENSDARG00000062054	-0.577303	0.216622	0.0221476	1.65467
ENSDARG00000071697	-0.577687	0.260344	0.0481408	1.31749
ENSDARG00000045036	-0.580145	0.194262	0.0114599	1.94082
ENSDARG00000006791	-0.580949	0.257989	0.0463518	1.33393
ENSDARG00000100020	-0.582498	0.180879	0.00637243	2.19569
ENSDARG00000013730	-0.588414	0.194574	0.0106355	1.97324
ENSDARG00000074341	-0.592111	0.264003	0.0456488	1.34057
ENSDARG00000043009	-0.598041	0.192255	0.00841223	2.07509
ENSDARG00000062501	-0.598265	0.263471	0.0434417	1.36209
ENSDARG00000102986	-0.60076	0.241017	0.0299743	1.52325
ENSDARG00000078527	-0.600943	0.226179	0.0220159	1.65726
ENSDARG00000074544	-0.603102	0.209001	0.0140044	1.85374
ENSDARG00000004017	-0.605955	0.196539	0.00876375	2.05731
ENSDARG00000061602	-0.612578	0.180007	0.00375988	2.42483
ENSDARG00000099954	-0.613118	0.211558	0.0134567	1.87106
ENSDARG00000009480	-0.613126	0.237246	0.0257281	1.58959
ENSDARG00000014577	-0.613355	0.219432	0.0171248	1.76637
ENSDARG00000045074	-0.613461	0.23131	0.021796	1.66162
ENSDARG00000063631	-0.61724	0.276083	0.045013	1.34666
ENSDARG00000011488	-0.622288	0.202023	0.00875572	2.05771
ENSDARG00000019191	-0.629125	0.222272	0.015575	1.80757
ENSDARG00000016011	-0.631147	0.180725	0.00289215	2.53878
ENSDARG00000037012	-0.640023	0.241161	0.021796	1.66162
ENSDARG00000075230	-0.645718	0.213864	0.010068	1.99706
ENSDARG00000097869	-0.649177	0.248123	0.0227562	1.6429
ENSDARG00000112931	-0.649652	0.257642	0.0269763	1.56902
ENSDARG00000062830	-0.655421	0.302434	0.0481408	1.31749
ENSDARG00000005232	-0.658443	0.260651	0.0265114	1.57657
ENSDARG00000088630	-0.658596	0.178999	0.0016415	2.78476
ENSDARG00000008032	-0.661359	0.112848	1.86707e-07	6.72884
ENSDARG00000099532	-0.661926	0.271587	0.0313585	1.50365
ENSDARG00000016132	-0.668159	0.288928	0.0386043	1.41336
ENSDARG00000031618	-0.668765	0.293904	0.0409893	1.38733
ENSDARG00000102356	-0.669544	0.248394	0.0196311	1.70706
ENSDARG00000011890	-0.673338	0.199707	0.00382925	2.41689
ENSDARG00000016536	-0.677632	0.237991	0.0141797	1.84833
ENSDARG00000033307	-0.677988	0.301566	0.0420785	1.37594
ENSDARG00000060319	-0.679032	0.228086	0.0106586	1.9723
ENSDARG00000067545	-0.68	0.258534	0.0216475	1.66459
ENSDARG00000044332	-0.680901	0.207944	0.00495259	2.30517
ENSDARG00000102115	-0.684947	0.195347	0.00263444	2.57931
ENSDARG00000044925	-0.689342	0.233787	0.0112891	1.94734
ENSDARG00000090081	-0.691493	0.258369	0.0198734	1.70173
ENSDARG00000060036	-0.693114	0.260323	0.0202621	1.69332
ENSDARG00000068401	-0.693135	0.271487	0.0247954	1.60563
ENSDARG00000059646	-0.694457	0.177707	0.000734407	3.13406
ENSDARG00000025301	-0.695734	0.233808	0.0106823	1.97134
ENSDARG00000043342	-0.695939	0.294615	0.0345644	1.46137
ENSDARG00000102599	-0.696603	0.26832	0.0227974	1.64211
ENSDARG00000011170	-0.70043	0.208768	0.00375988	2.42483
ENSDARG00000061235	-0.702671	0.201574	0.00275546	2.55981
ENSDARG00000045416	-0.704193	0.277085	0.0247954	1.60563
ENSDARG00000103720	-0.711704	0.310994	0.0386885	1.41242
ENSDARG00000068208	-0.712115	0.135116	3.14945e-06	5.50176
ENSDARG00000077207	-0.714315	0.22217	0.00558715	2.25281
ENSDARG00000020107	-0.717128	0.227803	0.00671402	2.17302
ENSDARG00000002013	-0.720153	0.219716	0.00462134	2.33523
ENSDARG00000045959	-0.720677	0.325261	0.0423749	1.37289
ENSDARG00000002745	-0.721838	0.271888	0.0202621	1.69332
ENSDARG00000101199	-0.755634	0.232605	0.0049657	2.30402
ENSDARG00000096319	-0.757757	0.184592	0.00035128	3.45435
ENSDARG00000101849	-0.767133	0.180326	0.000204321	3.68969
ENSDARG00000006353	-0.767372	0.259694	0.010381	1.98376
ENSDARG00000100003	-0.768599	0.253454	0.00875572	2.05771
ENSDARG00000058256	-0.768906	0.22669	0.00342382	2.46549
ENSDARG00000032820	-0.771812	0.346403	0.0409893	1.38733
ENSDARG00000062460	-0.772059	0.204723	0.00111498	2.95273
ENSDARG00000102736	-0.77808	0.287383	0.0177825	1.75001
ENSDARG00000010312	-0.788311	0.249011	0.00617418	2.20942
ENSDARG00000100479	-0.792282	0.377229	0.0481753	1.31718
ENSDARG00000018898	-0.793346	0.295614	0.01834	1.7366
ENSDARG00000086302	-0.794551	0.269421	0.0103363	1.98563
ENSDARG00000055129	-0.797545	0.285867	0.0147995	1.82975
ENSDARG00000095556	-0.798109	0.296342	0.0181889	1.74019
ENSDARG00000094300	-0.798696	0.283694	0.0140906	1.85107
ENSDARG00000026383	-0.800791	0.248982	0.0051995	2.28404
ENSDARG00000035732	-0.804681	0.171905	3.88716e-05	4.41037
ENSDARG00000100693	-0.808043	0.390918	0.0498998	1.3019
ENSDARG00000095767	-0.82451	0.281174	0.0106823	1.97134
ENSDARG00000018593	-0.826388	0.271323	0.00814532	2.08909
ENSDARG00000098171	-0.84152	0.246808	0.00311742	2.50621
ENSDARG00000097208	-0.842523	0.357903	0.0318396	1.49703
ENSDARG00000008859	-0.84314	0.382979	0.0413386	1.38364
ENSDARG00000090623	-0.843314	0.304516	0.0151372	1.81996
ENSDARG00000040526	-0.843541	0.324792	0.0210434	1.67688
ENSDARG00000007184	-0.845558	0.204533	0.000301978	3.52002
ENSDARG00000088929	-0.847893	0.246672	0.00293126	2.53295
ENSDARG00000003820	-0.850571	0.380356	0.0393509	1.40505
ENSDARG00000055991	-0.851351	0.404243	0.0463518	1.33393
ENSDARG00000019130	-0.853114	0.308451	0.0152628	1.81637
ENSDARG00000103333	-0.861308	0.248166	0.00263444	2.57931
ENSDARG00000077249	-0.869755	0.397983	0.0416357	1.38053
ENSDARG00000062000	-0.870195	0.3246	0.017792	1.74978
ENSDARG00000016514	-0.872301	0.400199	0.0420785	1.37594
ENSDARG00000104396	-0.875632	0.308079	0.012736	1.89497
ENSDARG00000041586	-0.877732	0.304971	0.0117882	1.92855
ENSDARG00000017780	-0.881301	0.217619	0.000410927	3.38623
ENSDARG00000101794	-0.883298	0.328285	0.0171378	1.76604
ENSDARG00000077726	-0.884207	0.431171	0.0491467	1.30851
ENSDARG00000076667	-0.887445	0.139665	9.56682e-09	8.01923
ENSDARG00000010434	-0.895734	0.182956	1.53992e-05	4.8125
ENSDARG00000100167	-0.895793	0.205852	0.000131091	3.88243
ENSDARG00000017386	-0.906468	0.342371	0.0187106	1.72791
ENSDARG00000083760	-0.906964	0.225193	0.00042435	3.37228
ENSDARG00000078983	-0.909089	0.32685	0.0141797	1.84833
ENSDARG00000029695	-0.909183	0.25636	0.00202243	2.69413
ENSDARG00000038429	-0.91094	0.262578	0.00262388	2.58106
ENSDARG00000061841	-0.9116	0.168202	1.40833e-06	5.85129
ENSDARG00000092945	-0.913596	0.316581	0.0114306	1.94193
ENSDARG00000074120	-0.914856	0.31832	0.0116623	1.93321
ENSDARG00000054942	-0.915195	0.321181	0.0125957	1.89978
ENSDARG00000020239	-0.915209	0.191907	2.61325e-05	4.58282
ENSDARG00000070717	-0.917373	0.378743	0.0274306	1.56176
ENSDARG00000055712	-0.918239	0.299504	0.00748692	2.1257
ENSDARG00000074819	-0.918426	0.295136	0.00648161	2.18832
ENSDARG00000075666	-0.919457	0.197481	4.09111e-05	4.38816
ENSDARG00000087303	-0.921048	0.284461	0.00467024	2.33066
ENSDARG00000035810	-0.925453	0.40614	0.0350025	1.4559
ENSDARG00000098954	-0.926114	0.201121	4.90687e-05	4.3092
ENSDARG00000010752	-0.933717	0.343897	0.0162863	1.78818
ENSDARG00000096368	-0.937591	0.416254	0.0366251	1.43622
ENSDARG00000027744	-0.937742	0.215475	0.000131091	3.88243
ENSDARG00000018399	-0.940346	0.285404	0.00400857	2.39701
ENSDARG00000040469	-0.941244	0.441857	0.0428941	1.3676
ENSDARG00000074168	-0.941742	0.196993	2.47143e-05	4.60705
ENSDARG00000061761	-0.945218	0.256295	0.00132953	2.8763
ENSDARG00000052690	-0.948961	0.210349	7.15866e-05	4.14517
ENSDARG00000034227	-0.953471	0.179807	2.4205e-06	5.61609
ENSDARG00000102777	-0.95463	0.400318	0.0290075	1.53749
ENSDARG00000036295	-0.957187	0.122821	5.23186e-13	12.2813
ENSDARG00000071437	-0.958584	0.325758	0.0101555	1.9933
ENSDARG00000055276	-0.961194	0.367812	0.0198734	1.70173
ENSDARG00000011373	-0.96148	0.177404	1.39707e-06	5.85478
ENSDARG00000028389	-0.963346	0.404322	0.0290837	1.53635
ENSDARG00000019503	-0.967101	0.470761	0.0481408	1.31749
ENSDARG00000060120	-0.970904	0.443043	0.0403118	1.39457
ENSDARG00000087186	-0.972063	0.170311	3.37543e-07	6.47167
ENSDARG00000095464	-0.97962	0.479194	0.0481753	1.31718
ENSDARG00000103498	-0.991737	0.227835	0.000129749	3.8869
ENSDARG00000007743	-0.991792	0.311248	0.00503681	2.29784
ENSDARG00000074850	-0.992418	0.461719	0.0421087	1.37563
ENSDARG00000075282	-0.993611	0.176822	5.24232e-07	6.28048
ENSDARG00000097137	-0.995722	0.343752	0.0110132	1.95809
ENSDARG00000088091	-1.00425	0.44193	0.0348746	1.45749
ENSDARG00000117609	-1.00661	0.469191	0.0420785	1.37594
ENSDARG00000099336	-1.00905	0.355729	0.0123189	1.90943
ENSDARG00000017982	-1.02041	0.351273	0.0106823	1.97134
ENSDARG00000109678	-1.02424	0.421676	0.0265114	1.57657
ENSDARG00000097879	-1.02514	0.277051	0.00125598	2.90102
ENSDARG00000036848	-1.02891	0.380515	0.0162332	1.7896
ENSDARG00000025428	-1.03591	0.493949	0.0440095	1.35645
ENSDARG00000110963	-1.04318	0.295224	0.00202243	2.69413
ENSDARG00000076830	-1.04873	0.431405	0.0263917	1.57853
ENSDARG00000003584	-1.05329	0.293802	0.00170105	2.76928
ENSDARG00000074721	-1.06737	0.306785	0.00238592	2.62234
ENSDARG00000007693	-1.0684	0.312258	0.00283369	2.54765
ENSDARG00000000796	-1.06865	0.468915	0.0336675	1.47279
ENSDARG00000040033	-1.07003	0.278615	0.000778495	3.10874
ENSDARG00000095051	-1.07319	0.423108	0.021654	1.66446
ENSDARG00000101135	-1.07435	0.431124	0.0235967	1.62715
ENSDARG00000029075	-1.08168	0.339871	0.0051995	2.28404
ENSDARG00000099306	-1.10357	0.440223	0.0227562	1.6429
ENSDARG00000055530	-1.10459	0.325436	0.00299924	2.52299
ENSDARG00000078829	-1.10654	0.409003	0.0158798	1.79916
ENSDARG00000005085	-1.11632	0.232022	2.06664e-05	4.68474
ENSDARG00000024759	-1.12479	0.422286	0.0171378	1.76604
ENSDARG00000038643	-1.13853	0.46418	0.025194	1.5987
ENSDARG00000057661	-1.14151	0.254216	7.49553e-05	4.1252
ENSDARG00000071304	-1.1419	0.328519	0.00237647	2.62407
ENSDARG00000089227	-1.14657	0.404763	0.0121685	1.91476
ENSDARG00000092608	-1.15846	0.251617	4.60301e-05	4.33696
ENSDARG00000002986	-1.1805	0.445632	0.0173784	1.75999
ENSDARG00000061368	-1.18287	0.327691	0.00161848	2.79089
ENSDARG00000099376	-1.18937	0.487251	0.0255832	1.59205
ENSDARG00000104478	-1.18943	0.289455	0.000284681	3.54564
ENSDARG00000035551	-1.19547	0.47413	0.021654	1.66446
ENSDARG00000013082	-1.19993	0.450627	0.017447	1.75828
ENSDARG00000094857	-1.19995	0.37051	0.00438676	2.35786
ENSDARG00000101791	-1.21456	0.553991	0.0380178	1.42001
ENSDARG00000092354	-1.22217	0.244767	8.77282e-06	5.05686
ENSDARG00000089921	-1.22421	0.340762	0.00168165	2.77427
ENSDARG00000109371	-1.22497	0.513719	0.0273208	1.56351
ENSDARG00000037618	-1.22684	0.265834	4.40492e-05	4.35606
ENSDARG00000099148	-1.22749	0.246631	9.45885e-06	5.02416
ENSDARG00000097456	-1.2289	0.47756	0.0202621	1.69332
ENSDARG00000035859	-1.23426	0.526234	0.0290837	1.53635
ENSDARG00000059053	-1.24359	0.323413	0.000722694	3.14105
ENSDARG00000043475	-1.24371	0.374471	0.0034463	2.46265
ENSDARG00000038938	-1.25297	0.324712	0.000712653	3.14712
ENSDARG00000101996	-1.25619	0.234812	1.90635e-06	5.7198
ENSDARG00000105409	-1.26055	0.356407	0.00197458	2.70453
ENSDARG00000099359	-1.27201	0.315863	0.000398367	3.39972
ENSDARG00000094965	-1.27387	0.240821	2.4205e-06	5.61609
ENSDARG00000078770	-1.27929	0.300491	0.000173393	3.76097
ENSDARG00000104770	-1.29605	0.358221	0.0015551	2.80824
ENSDARG00000097169	-1.29806	0.525191	0.0235232	1.6285
ENSDARG00000079501	-1.30141	0.440829	0.0090401	2.04383
ENSDARG00000013946	-1.30506	0.254921	5.13261e-06	5.28966
ENSDARG00000093463	-1.30536	0.532759	0.0239828	1.6201
ENSDARG00000055159	-1.31107	0.354155	0.00122194	2.91295
ENSDARG00000097696	-1.32969	0.331071	0.000412616	3.38445
ENSDARG00000096917	-1.33493	0.618982	0.0379322	1.42099
ENSDARG00000073789	-1.34424	0.415382	0.0043784	2.35869
ENSDARG00000036107	-1.35465	0.269435	7.45465e-06	5.12757
ENSDARG00000074094	-1.36047	0.587637	0.0299743	1.52325
ENSDARG00000020114	-1.36527	0.380741	0.00170464	2.76837
ENSDARG00000105393	-1.37357	0.540976	0.0215295	1.66697
ENSDARG00000070059	-1.37766	0.57037	0.0259257	1.58627
ENSDARG00000071095	-1.38766	0.417363	0.0034463	2.46265
ENSDARG00000087241	-1.38814	0.212867	3.0668e-09	8.51331
ENSDARG00000099719	-1.38899	0.210912	2.22185e-09	8.65329
ENSDARG00000052045	-1.39015	0.276498	7.2241e-06	5.14122
ENSDARG00000060246	-1.40401	0.41524	0.00296899	2.52739
ENSDARG00000042496	-1.41607	0.337008	0.000216283	3.66498
ENSDARG00000098821	-1.42084	0.293218	1.63401e-05	4.78675
ENSDARG00000013926	-1.43566	0.252067	3.37543e-07	6.47167
ENSDARG00000099351	-1.4364	0.383704	0.00101504	2.99352
ENSDARG00000017173	-1.4633	0.649348	0.0333856	1.47644
ENSDARG00000098108	-1.49409	0.410548	0.00144838	2.83912
ENSDARG00000075504	-1.49992	0.509645	0.00945566	2.02431
ENSDARG00000104038	-1.5076	0.53992	0.0126379	1.89833
ENSDARG00000098444	-1.52901	0.685963	0.0345644	1.46137
ENSDARG00000054848	-1.55916	0.44172	0.00191114	2.71871
ENSDARG00000097369	-1.56159	0.456501	0.00266923	2.57361
ENSDARG00000112049	-1.57482	0.532987	0.00875572	2.05771
ENSDARG00000117311	-1.59104	0.696666	0.0293092	1.533
ENSDARG00000069734	-1.60897	0.682706	0.0273208	1.56351
ENSDARG00000089094	-1.61491	0.485853	0.0034136	2.46679
ENSDARG00000061941	-1.61728	0.516122	0.0057192	2.24266
ENSDARG00000105352	-1.6428	0.426642	0.000712653	3.14712
ENSDARG00000099177	-1.66004	0.260958	8.71608e-09	8.05968
ENSDARG00000111619	-1.67959	0.699885	0.0263542	1.57915
ENSDARG00000010962	-1.7069	0.627039	0.0148043	1.82961
ENSDARG00000062397	-1.73976	0.259607	1.16106e-09	8.93515
ENSDARG00000110670	-1.744	0.529519	0.00382925	2.41689
ENSDARG00000044550	-1.75448	0.349565	7.6716e-06	5.11511
ENSDARG00000026505	-1.76571	0.673329	0.0176798	1.75252
ENSDARG00000001975	-1.77232	0.374462	2.62507e-05	4.58086
ENSDARG00000068858	-1.77313	0.719676	0.0240097	1.61961
ENSDARG00000078731	-1.85336	0.362587	5.27941e-06	5.27741
ENSDARG00000074869	-1.85396	0.433654	0.000144198	3.84104
ENSDARG00000097292	-1.86	0.697521	0.017515	1.75659
ENSDARG00000043135	-1.89858	0.738532	0.0202621	1.69332
ENSDARG00000105507	-1.9145	0.725071	0.0181119	1.74203
ENSDARG00000113320	-1.91721	0.705881	0.0146205	1.83504
ENSDARG00000099006	-1.91824	0.685082	0.012736	1.89497
ENSDARG00000101362	-1.93655	0.329011	1.31988e-07	6.87947
ENSDARG00000104600	-1.94317	0.545719	0.00148622	2.82792
ENSDARG00000035610	-1.95607	0.215594	1.19716e-17	16.9218
ENSDARG00000031426	-1.97527	0.314769	1.24712e-08	7.90409
ENSDARG00000059923	-1.9816	0.450573	0.00010025	3.99891
ENSDARG00000098892	-2.04403	0.769713	0.0176407	1.75348
ENSDARG00000096859	-2.0441	0.554704	0.00128006	2.89277
ENSDARG00000094466	-2.05976	0.560545	0.00126046	2.89947
ENSDARG00000105382	-2.073	0.650725	0.00497254	2.30342
ENSDARG00000108505	-2.1253	0.541306	0.000563788	3.24888
ENSDARG00000096857	-2.12883	0.549357	0.000712653	3.14712
ENSDARG00000105431	-2.13245	0.474786	7.01419e-05	4.15402
ENSDARG00000034852	-2.16678	0.418632	3.74683e-06	5.42634
ENSDARG00000105344	-2.17404	0.420438	4.38151e-06	5.35838
ENSDARG00000060196	-2.29664	0.4503	5.31132e-06	5.2748
ENSDARG00000086305	-2.3211	0.653834	0.00186879	2.72844
ENSDARG00000102856	-2.34577	0.505701	3.76606e-05	4.42411
ENSDARG00000098879	-2.37603	0.532952	8.8629e-05	4.05242
ENSDARG00000023587	-2.43656	0.73052	0.00328634	2.48329
ENSDARG00000080016	-2.53423	0.588889	0.000138883	3.85735
ENSDARG00000115843	-2.54576	0.660732	0.000466987	3.3307
ENSDARG00000086495	-2.57856	0.477067	1.39707e-06	5.85478
ENSDARG00000095448	-2.6097	0.803946	0.00418431	2.37838
ENSDARG00000056477	-2.71007	0.538687	7.96379e-06	5.09888
ENSDARG00000098610	-2.72294	0.658463	0.000237077	3.62511
ENSDARG00000002831	-2.74427	0.606794	4.40492e-05	4.35606
ENSDARG00000090119	-2.8713	0.892181	0.0045914	2.33805
ENSDARG00000098179	-2.91906	0.563582	3.8178e-06	5.41819
ENSDARG00000104635	-2.98743	0.909546	0.00395154	2.40323
ENSDARG00000036888	-2.99205	0.355347	5.64607e-15	14.2483
ENSDARG00000059054	-3.06529	0.586169	3.14945e-06	5.50176
ENSDARG00000112648	-3.06945	0.857504	0.00197458	2.70453
ENSDARG00000113971	-3.45591	0.856669	0.000437163	3.35936
ENSDARG00000097878	-3.47558	0.975591	0.00274369	2.56167
ENSDARG00000102475	-3.65889	0.73627	1.17479e-05	4.93004
ENSDARG00000026704	-3.92887	0.976399	0.000322446	3.49154
ENSDARG00000094175	-4.24468	0.932458	0.000104669	3.98018
ENSDARG00000092003	-4.76759	0.832745	3.77161e-07	6.42347
ENSDARG00000104407	-5.64054	1.52944	0.000343656	3.46388
ENSDARG00000106267	-6.11803	0.581783	2.01452e-23	22.6958
ENSDARG00000077252	-6.26647	1.10135	1.92882e-06	5.71471
ENSDARG00000098011	-6.89756	2.72725	0.000294143	3.53144
ENSDARG00000097018	-7.71248	2.80134	2.62507e-05	4.58086
ENSDARG00000097433	-8.73915	2.93653	2.34818e-06	5.62927
ENSDARG00000105219	-9.5296	2.94142	3.0668e-09	8.51331
ENSDARG00000092228	-9.90856	2.93237	5.54817e-12	11.2559
